# Supplementary material for: Towards high-performance polyesters from carbon dioxide: novel polyhydroxyarylates from engineered Cupriavidus necator
Source: Research Square preprint supplement (doi:10.21203/rs.3.rs-2719603/v1), 2023-04-27
Supplement: Supplementary file 1 [file d463bfb78581a43494a06181.xlsx]

## Sheet: P2HE
	C. necator on Fructose + CO2				C. necator on Glycerol + CO2				C. necator on Acetate + CO2				C. necator on Formate + CO2				C. necator on CO2 + H2
RxN		Equation	Function / Enzyme	RxN		Equation	Function / Enzyme	RxN		Equation	Function / Enzyme	RxN		Equation	Function / Enzyme	RxN		Equation	Function / Enzyme
R1	ReactionFormulas = {	'--> CO2[e]'	Carbondioxide in	R1	ReactionFormulas = {	'--> CO2[e]'	Carbondioxide in	R1	ReactionFormulas = {	'--> CO2[e]'	Carbondioxide in	R1	ReactionFormulas = {	'--> CO2[e]'	Carbondioxide in	R1	ReactionFormulas = {	'--> CO2[e]'	Carbondioxide in
R2		'--> FRC[e]'	Fructose in	R2		'--> GLY[e]'	Fructose in	R2		'--> AC[e]'	Fructose in	R2		'--> FOR[e]'	Fructose in	R2		'--> H2[e]'	Hydrogen in
R3		'--> NH3[e]'	Ammonia in	R3		'--> NH3[e]'	Ammonia in	R3		'--> NH3[e]'	Ammonia in	R3		'--> NH3[e]'	Ammonia in	R3		'--> NH3[e]'	Ammonia in
R4		'--> O2[e]'	Oxygen in	R4		'--> O2[e]'	Oxygen in	R4		'--> O2[e]'	Oxygen in	R4		'--> O2[e]'	Oxygen in	R4		'--> O2[e]'	Oxygen in
R5		'CO2[e] -->'	Carbondioxide out	R5		'CO2[e] -->'	Carbondioxide out	R5		'CO2[e] -->'	Carbondioxide out	R5		'CO2[e] -->'	Carbondioxide out	R5		'CO2[e] -->'	Carbondioxide out
R6		'FOR[e] -->'	Formate out	R6		'FOR[e] -->'	Formate out	R6		'FOR[e] -->'	Formate out	R6		'FOR[e] -->'	Formate out	R6		'FOR[e] -->'	Formate out
R7		'AC[e] -->'	Acetate out	R7		'AC[e] -->'	Acetate out	R7		'AC[e] -->'	Acetate out	R7		'AC[e] -->'	Acetate out	R7		'AC[e] -->'	Acetate out
R8		'ETOH[e] -->'	Ethanol out	R8		'ETOH[e] -->'	Ethanol out	R8		'ETOH[e] -->'	Ethanol out	R8		'ETOH[e] -->'	Ethanol out	R8		'ETOH[e] -->'	Ethanol out
R9		'LAC[e] -->'	Lactate out	R9		'LAC[e] -->'	Lactate out	R9		'LAC[e] -->'	Lactate out	R9		'LAC[e] -->'	Lactate out	R9		'LAC[e] -->'	Lactate out
R10		'ACETONE[e] -->'	Acetone out	R10		'ACETONE[e] -->'	Acetone out	R10		'ACETONE[e] -->'	Acetone out	R10		'ACETONE[e] -->'	Acetone out	R10		'ACETONE[e] -->'	Acetone out
R11		'SUC[e] -->'	Succinate out	R11		'SUC[e] -->'	Succinate out	R11		'SUC[e] -->'	Succinate out	R11		'SUC[e] -->'	Succinate out	R11		'SUC[e] -->'	Succinate out
R12		'PHB[e] -->'	Polyhydroxybutyrate out	R12		'PHB[e] -->'	Polyhydroxybutyrate out	R12		'PHB[e] -->'	Polyhydroxybutyrate out	R12		'PHB[e] -->'	Polyhydroxybutyrate out	R12		'PHB[e] -->'	Polyhydroxybutyrate out
R13		'BIOMASS[e] -->'	Biomass out	R13		'BIOMASS[e] -->'	Biomass out	R13		'BIOMASS[e] -->'	Biomass out	R13		'BIOMASS[e] -->'	Biomass out	R13		'BIOMASS[e] -->'	Biomass out
R14		'PRODUCT[e] -->'	Product out	R14		'PRODUCT[e] -->'	Product out	R14		'PRODUCT[e] -->'	Product out	R14		'PRODUCT[e] -->'	Product out	R14		'PRODUCT[e] -->'	Product out
R15		'FOR[c] + H[c] + 0.3 ATP[c] --> FOR[e] + H[e] + 0.3 ADP[c] + 0.3 Pi[c]'	Formate export by ABC transporter	R15		'FOR[c] + H[c] + 0.3 ATP[c] --> FOR[e] + H[e] + 0.3 ADP[c] + 0.3 Pi[c]'	Formate export by ABC transporter	R15		'FOR[c] + H[c] + 0.3 ATP[c] --> FOR[e] + H[e] + 0.3 ADP[c] + 0.3 Pi[c]'	Formate export by ABC transporter	R15		'FOR[c] + H[c] <-- FOR[e] + H[e]'	Formate export by ABC transporter	R15		'FOR[c] + H[c] + 0.3 ATP[c] --> FOR[e] + H[e] + 0.3 ADP[c] + 0.3 Pi[c]'	Formate export by ABC transporter
R16		'AC[c] + H[c] + 0.3 ATP[c] --> AC[e] + H[e] + 0.3 ADP[c] + 0.3 Pi[c]'	Acetate export by ABC transporter	R16		'AC[c] + H[c] + 0.3 ATP[c] --> AC[e] + H[e] + 0.3 ADP[c] + 0.3 Pi[c]'	Acetate export by ABC transporter	R16		'AC[c] + H[c] <-- AC[e] + H[e]'	Acetate import by proton gradient	R16		'AC[c] + H[c] + 0.3 ATP[c] --> AC[e] + H[e] + 0.3 ADP[c] + 0.3 Pi[c]'	Acetate export by ABC transporter	R16		'AC[c] + H[c] + 0.3 ATP[c] --> AC[e] + H[e] + 0.3 ADP[c] + 0.3 Pi[c]'	Acetate export by ABC transporter
R17		'ETOH[c] --> ETOH[e]'	Ethanol export by diffusion	R17		'ETOH[c] --> ETOH[e]'	Ethanol export by diffusion	R17		'ETOH[c] --> ETOH[e]'	Ethanol export by diffusion	R17		'ETOH[c] --> ETOH[e]'	Ethanol export by diffusion	R17		'ETOH[c] --> ETOH[e]'	Ethanol export by diffusion
R18		'LAC[c] + H[c] + 0.3 ATP[c] --> LAC[e] + H[e] + 0.3 ADP[c] + 0.3 Pi[c]'	Lactate export by ABC transporter	R18		'LAC[c] + H[c] + 0.3 ATP[c] --> LAC[e] + H[e] + 0.3 ADP[c] + 0.3 Pi[c]'	Lactate export by ABC transporter	R18		'LAC[c] + H[c] + 0.3 ATP[c] --> LAC[e] + H[e] + 0.3 ADP[c] + 0.3 Pi[c]'	Lactate export by ABC transporter	R18		'LAC[c] + H[c] + 0.3 ATP[c] --> LAC[e] + H[e] + 0.3 ADP[c] + 0.3 Pi[c]'	Lactate export by ABC transporter	R18		'LAC[c] + H[c] + 0.3 ATP[c] --> LAC[e] + H[e] + 0.3 ADP[c] + 0.3 Pi[c]'	Lactate export by ABC transporter
R19		'ACETONE[c] --> ACETONE[e]'	Acetone export by diffusion	R19		'ACETONE[c] --> ACETONE[e]'	Acetone export by diffusion	R19		'ACETONE[c] --> ACETONE[e]'	Acetone export by diffusion	R19		'ACETONE[c] --> ACETONE[e]'	Acetone export by diffusion	R19		'ACETONE[c] --> ACETONE[e]'	Acetone export by diffusion
R20		'SUC[c] + 2 H[c] + 0.6 ATP[c] --> SUC[e] + 2 H[e] + 0.6 ADP[c] + 0.6 Pi[c]'	Succinate export by ABC transporter	R20		'SUC[c] + 2 H[c] + 0.6 ATP[c] --> SUC[e] + 2 H[e] + 0.6 ADP[c] + 0.6 Pi[c]'	Succinate export by ABC transporter	R20		'SUC[c] + 2 H[c] + 0.6 ATP[c] --> SUC[e] + 2 H[e] + 0.6 ADP[c] + 0.6 Pi[c]'	Succinate export by ABC transporter	R20		'SUC[c] + 2 H[c] + 0.6 ATP[c] --> SUC[e] + 2 H[e] + 0.6 ADP[c] + 0.6 Pi[c]'	Succinate export by ABC transporter	R20		'SUC[c] + 2 H[c] + 0.6 ATP[c] --> SUC[e] + 2 H[e] + 0.6 ADP[c] + 0.6 Pi[c]'	Succinate export by ABC transporter
R21		'BIOMASS[c] --> BIOMASS[e]'	Growth	R21		'BIOMASS[c] --> BIOMASS[e]'	Growth	R21		'BIOMASS[c] --> BIOMASS[e]'	Growth	R21		'BIOMASS[c] --> BIOMASS[e]'	Growth	R21		'BIOMASS[c] --> BIOMASS[e]'	Growth
R22		'P-G[c] --> PRODUCT[e]'	Product formation	R22		'P-G[c] --> PRODUCT[e]'	Product formation	R22		'P-G[c] --> PRODUCT[e]'	Product formation	R22		'P-G[c] --> PRODUCT[e]'	Product formation	R22		'P-G[c] --> PRODUCT[e]'	Product formation
R23		'O2[e] --> O2[c]'	Oxygen import by diffusion	R23		'O2[e] --> O2[c]'	Oxygen import by diffusion	R23		'O2[e] --> O2[c]'	Oxygen import by diffusion	R23		'O2[e] --> O2[c]'	Oxygen import by diffusion	R23		'O2[e] --> O2[c]'	Oxygen import by diffusion
R24		'NH3[e] --> NH3[c]'	Ammonia import by diffusion	R24		'NH3[e] --> NH3[c]'	Ammonia import by diffusion	R24		'NH3[e] --> NH3[c]'	Ammonia import by diffusion	R24		'NH3[e] --> NH3[c]'	Ammonia import by diffusion	R24		'NH3[e] --> NH3[c]'	Ammonia import by diffusion
R25		'H2[e] --> H2[c]'	Hydrogen import by diffusion	R25		'H2[e] --> H2[c]'	Hydrogen import by diffusion	R25		'H2[e] --> H2[c]'	Hydrogen import by diffusion	R25		'H2[e] --> H2[c]'	Hydrogen import by diffusion	R25		'H2[e] --> H2[c]'	Hydrogen import by diffusion
R26		'CO2[e] <--> CO2[c]'	Carbondioxide import by diffusion	R26		'CO2[e] <--> CO2[c]'	Carbondioxide import by diffusion	R26		'CO2[e] <--> CO2[c]'	Carbondioxide import by diffusion	R26		'CO2[e] <--> CO2[c]'	Carbondioxide import by diffusion	R26		'CO2[e] <--> CO2[c]'	Carbondioxide exchange by diffusion
R27		'FRC[e] + PEP[c] --> F6P[c] + PYR[c]'	PTS [ec:2.7.1.69]	R27		'FRC[e] + PEP[c] --> F6P[c] + PYR[c]'	PTS [ec:2.7.1.69]	R27		'FRC[e] + PEP[c] --> F6P[c] + PYR[c]'	PTS [ec:2.7.1.69]	R27		'FRC[e] + PEP[c] --> F6P[c] + PYR[c]'	PTS [ec:2.7.1.69]	R27		'FRC[e] + PEP[c] --> F6P[c] + PYR[c]'	PTS [ec:2.7.1.69]
R28		'GLY[e] + ATP[c] --> ADP[c] + GLY3P[c]'	Glycerol kinase [ec:2.7.1.30]	R28		'GLY[e] + ATP[c] --> ADP[c] + GLY3P[c]'	Glycerol kinase [ec:2.7.1.30]	R28		'GLY[e] + ATP[c] --> ADP[c] + GLY3P[c]'	Glycerol kinase [ec:2.7.1.30]	R28		'GLY[e] + ATP[c] --> ADP[c] + GLY3P[c]'	Glycerol kinase [ec:2.7.1.30]	R28		'GLY[e] + ATP[c] --> ADP[c] + GLY3P[c]'	Glycerol kinase [ec:2.7.1.30]
R29		'G6P[c] + NADP[c] --> 6-PG-lac[c] + NADPH[c]'	Glucose-6-phosphate dehydrogenase [ec:1.1.1.49]	R29		'G6P[c] + NADP[c] --> 6-PG-lac[c] + NADPH[c]'	Glucose-6-phosphate dehydrogenase [ec:1.1.1.49]	R29		'G6P[c] + NADP[c] --> 6-PG-lac[c] + NADPH[c]'	Glucose-6-phosphate dehydrogenase [ec:1.1.1.49]	R29		'G6P[c] + NADP[c] --> 6-PG-lac[c] + NADPH[c]'	Glucose-6-phosphate dehydrogenase [ec:1.1.1.49]	R29		'G6P[c] + NADP[c] --> 6-PG-lac[c] + NADPH[c]'	Glucose-6-phosphate dehydrogenase [ec:1.1.1.49]
R30		'6-PG-lac[c] --> 6-PG[c]'	6-phosphogluconolactonase [ec:3.1.1.31]	R30		'6-PG-lac[c] --> 6-PG[c]'	6-phosphogluconolactonase [ec:3.1.1.31]	R30		'6-PG-lac[c] --> 6-PG[c]'	6-phosphogluconolactonase [ec:3.1.1.31]	R30		'6-PG-lac[c] --> 6-PG[c]'	6-phosphogluconolactonase [ec:3.1.1.31]	R30		'6-PG-lac[c] --> 6-PG[c]'	6-phosphogluconolactonase [ec:3.1.1.31]
R31		'6-PG[c] --> KDPG[c]'	6-phosphogluconate dehydratase [ec:4.2.1.12]	R31		'6-PG[c] --> KDPG[c]'	6-phosphogluconate dehydratase [ec:4.2.1.12]	R31		'6-PG[c] --> KDPG[c]'	6-phosphogluconate dehydratase [ec:4.2.1.12]	R31		'6-PG[c] --> KDPG[c]'	6-phosphogluconate dehydratase [ec:4.2.1.12]	R31		'6-PG[c] --> KDPG[c]'	6-phosphogluconate dehydratase [ec:4.2.1.12]
R32		'KDPG[c] --> G3P[c] + PYR[c]'	2-keto-3-deoxy-6-phosphogluconate aldolase [ec:4.1.2.14]	R32		'KDPG[c] --> G3P[c] + PYR[c]'	2-keto-3-deoxy-6-phosphogluconate aldolase [ec:4.1.2.14]	R32		'KDPG[c] --> G3P[c] + PYR[c]'	2-keto-3-deoxy-6-phosphogluconate aldolase [ec:4.1.2.14]	R32		'KDPG[c] --> G3P[c] + PYR[c]'	2-keto-3-deoxy-6-phosphogluconate aldolase [ec:4.1.2.14]	R32		'KDPG[c] --> G3P[c] + PYR[c]'	2-keto-3-deoxy-6-phosphogluconate aldolase [ec:4.1.2.14]
R33		'6-PG[c] + NADP[c] --> Ril5P[c] + NADPH[c] + CO2[c]'	6-phosphogluconate dehydrogenase [ec:1.1.1.44]	R33		'6-PG[c] + NADP[c] --> Ril5P[c] + NADPH[c] + CO2[c]'	6-phosphogluconate dehydrogenase [ec:1.1.1.44]	R33		'6-PG[c] + NADP[c] --> Ril5P[c] + NADPH[c] + CO2[c]'	6-phosphogluconate dehydrogenase [ec:1.1.1.44]	R33		'6-PG[c] + NADP[c] --> Ril5P[c] + NADPH[c] + CO2[c]'	6-phosphogluconate dehydrogenase [ec:1.1.1.44]	R33		'6-PG[c] + NADP[c] --> Ril5P[c] + NADPH[c] + CO2[c]'	6-phosphogluconate dehydrogenase [ec:1.1.1.44]
R34		'Ril5P[c] + ATP[c] --> Ril15BP[c] + ADP[c]'	Phosphoribulokinase [ec:2.7.1.19]	R34		'Ril5P[c] + ATP[c] --> Ril15BP[c] + ADP[c]'	Phosphoribulokinase [ec:2.7.1.19]	R34		'Ril5P[c] + ATP[c] --> Ril15BP[c] + ADP[c]'	Phosphoribulokinase [ec:2.7.1.19]	R34		'Ril5P[c] + ATP[c] --> Ril15BP[c] + ADP[c]'	Phosphoribulokinase [ec:2.7.1.19]	R34		'Ril5P[c] + ATP[c] --> Ril15BP[c] + ADP[c]'	Phosphoribulokinase [ec:2.7.1.19]
R35		'5 Ril15BP[c] + 4 CO2[c] + 1 O2[c] --> 9 3-PG[c] + 1 PG[c]'	Ribulose-1,5-bisphosphate carboxylase/oxygenase (RuBisCO) "best case" [ec:4.1.1.39]	R35		'5 Ril15BP[c] + 4 CO2[c] + 1 O2[c] --> 9 3-PG[c] + 1 PG[c]'	Ribulose-1,5-bisphosphate carboxylase/oxygenase (RuBisCO) "best case" [ec:4.1.1.39]	R35		'5 Ril15BP[c] + 4 CO2[c] + 1 O2[c] --> 9 3-PG[c] + 1 PG[c]'	Ribulose-1,5-bisphosphate carboxylase/oxygenase (RuBisCO) "best case" [ec:4.1.1.39]	R35		'5 Ril15BP[c] + 4 CO2[c] + 1 O2[c] --> 9 3-PG[c] + 1 PG[c]'	Ribulose-1,5-bisphosphate carboxylase/oxygenase (RuBisCO) "best case" [ec:4.1.1.39]	R35		'5 Ril15BP[c] + 4 CO2[c] + 1 O2[c] --> 9 3-PG[c] + 1 PG[c]'	Ribulose-1,5-bisphosphate carboxylase/oxygenase (RuBisCO) "best case" [ec:4.1.1.39]
R36		'4 Ril15BP[c] + 3 CO2[c] + 1 O2[c] --> 7 3-PG[c] + 1 PG[c]'	Ribulose-1,5-bisphosphate carboxylase/oxygenase (RuBisCO) "worst case" [ec:4.1.1.39]	R36		'4 Ril15BP[c] + 3 CO2[c] + 1 O2[c] --> 7 3-PG[c] + 1 PG[c]'	Ribulose-1,5-bisphosphate carboxylase/oxygenase (RuBisCO) "worst case" [ec:4.1.1.39]	R36		'4 Ril15BP[c] + 3 CO2[c] + 1 O2[c] --> 7 3-PG[c] + 1 PG[c]'	Ribulose-1,5-bisphosphate carboxylase/oxygenase (RuBisCO) "worst case" [ec:4.1.1.39]	R36		'4 Ril15BP[c] + 3 CO2[c] + 1 O2[c] --> 7 3-PG[c] + 1 PG[c]'	Ribulose-1,5-bisphosphate carboxylase/oxygenase (RuBisCO) "worst case" [ec:4.1.1.39]	R36		'4 Ril15BP[c] + 3 CO2[c] + 1 O2[c] --> 7 3-PG[c] + 1 PG[c]'	Ribulose-1,5-bisphosphate carboxylase/oxygenase (RuBisCO) "worst case" [ec:4.1.1.39]
R37		'PG[c] --> GA[c] + Pi[c]'	2-phosphoglycolate phosphohydrolase [ec:3.1.3.18]	R37		'PG[c] --> GA[c] + Pi[c]'	2-phosphoglycolate phosphohydrolase [ec:3.1.3.18]	R37		'PG[c] --> GA[c] + Pi[c]'	2-phosphoglycolate phosphohydrolase [ec:3.1.3.18]	R37		'PG[c] --> GA[c] + Pi[c]'	2-phosphoglycolate phosphohydrolase [ec:3.1.3.18]	R37		'PG[c] --> GA[c] + Pi[c]'	2-phosphoglycolate phosphohydrolase [ec:3.1.3.18]
R38		'2 GA[c] + O2[c] --> 2 GLYOX[c]'	Glycolate dehydrogenase [ec:1.1.99.14]	R38		'2 GA[c] + O2[c] --> 2 GLYOX[c]'	Glycolate dehydrogenase [ec:1.1.99.14]	R38		'2 GA[c] + O2[c] --> 2 GLYOX[c]'	Glycolate dehydrogenase [ec:1.1.99.14]	R38		'2 GA[c] + O2[c] --> 2 GLYOX[c]'	Glycolate dehydrogenase [ec:1.1.99.14]	R38		'2 GA[c] + O2[c] --> 2 GLYOX[c]'	Glycolate dehydrogenase [ec:1.1.99.14]
R39		'2 GLYOX[c] --> TS[c] + CO2[c]'	Tartronate-semialdehyde synthase [ec:4.1.1.47]	R39		'2 GLYOX[c] --> TS[c] + CO2[c]'	Tartronate-semialdehyde synthase [ec:4.1.1.47]	R39		'2 GLYOX[c] --> TS[c] + CO2[c]'	Tartronate-semialdehyde synthase [ec:4.1.1.47]	R39		'2 GLYOX[c] --> TS[c] + CO2[c]'	Tartronate-semialdehyde synthase [ec:4.1.1.47]	R39		'2 GLYOX[c] --> TS[c] + CO2[c]'	Tartronate-semialdehyde synthase [ec:4.1.1.47]
R40		'TS[c] + NADH[c] --> Glycerate[c] + NAD[c]'	2-hydroxy-3-oxopropionate reductase [ec:1.1.1.60]	R40		'TS[c] + NADH[c] --> Glycerate[c] + NAD[c]'	2-hydroxy-3-oxopropionate reductase [ec:1.1.1.60]	R40		'TS[c] + NADH[c] --> Glycerate[c] + NAD[c]'	2-hydroxy-3-oxopropionate reductase [ec:1.1.1.60]	R40		'TS[c] + NADH[c] --> Glycerate[c] + NAD[c]'	2-hydroxy-3-oxopropionate reductase [ec:1.1.1.60]	R40		'TS[c] + NADH[c] --> Glycerate[c] + NAD[c]'	2-hydroxy-3-oxopropionate reductase [ec:1.1.1.60]
R41		'Glycerate[c] + ATP[c] --> 2-PG[c] + ADP[c]'	Glycerate 2-kinase [ec:2.7.1.165]	R41		'Glycerate[c] + ATP[c] --> 2-PG[c] + ADP[c]'	Glycerate 2-kinase [ec:2.7.1.165]	R41		'Glycerate[c] + ATP[c] --> 2-PG[c] + ADP[c]'	Glycerate 2-kinase [ec:2.7.1.165]	R41		'Glycerate[c] + ATP[c] --> 2-PG[c] + ADP[c]'	Glycerate 2-kinase [ec:2.7.1.165]	R41		'Glycerate[c] + ATP[c] --> 2-PG[c] + ADP[c]'	Glycerate 2-kinase [ec:2.7.1.165]
R42		'Ril5P[c] <--> R5P[c]'	Ribose-5-phosphate isomerase [ec:5.3.1.6]	R42		'Ril5P[c] <--> R5P[c]'	Ribose-5-phosphate isomerase [ec:5.3.1.6]	R42		'Ril5P[c] <--> R5P[c]'	Ribose-5-phosphate isomerase [ec:5.3.1.6]	R42		'Ril5P[c] <--> R5P[c]'	Ribose-5-phosphate isomerase [ec:5.3.1.6]	R42		'Ril5P[c] <--> R5P[c]'	Ribose-5-phosphate isomerase [ec:5.3.1.6]
R43		'Ril5P[c] <--> X5P[c]'	Ribulose-phosphate 3-epimerase [ec:5.1.3.1]	R43		'Ril5P[c] <--> X5P[c]'	Ribulose-phosphate 3-epimerase [ec:5.1.3.1]	R43		'Ril5P[c] <--> X5P[c]'	Ribulose-phosphate 3-epimerase [ec:5.1.3.1]	R43		'Ril5P[c] <--> X5P[c]'	Ribulose-phosphate 3-epimerase [ec:5.1.3.1]	R43		'Ril5P[c] <--> X5P[c]'	Ribulose-phosphate 3-epimerase [ec:5.1.3.1]
R44		'R5P[c] + X5P[c] <--> G3P[c] + S7P[c]'	Transketolase [ec:2.2.1.1]	R44		'R5P[c] + X5P[c] <--> G3P[c] + S7P[c]'	Transketolase [ec:2.2.1.1]	R44		'R5P[c] + X5P[c] <--> G3P[c] + S7P[c]'	Transketolase [ec:2.2.1.1]	R44		'R5P[c] + X5P[c] <--> G3P[c] + S7P[c]'	Transketolase [ec:2.2.1.1]	R44		'R5P[c] + X5P[c] <--> G3P[c] + S7P[c]'	Transketolase [ec:2.2.1.1]
R45		'G3P[c] + S7P[c] <--> E4P[c] + F6P[c]'	Transaldolase [ec:2.2.1.2]	R45		'G3P[c] + S7P[c] <--> E4P[c] + F6P[c]'	Transaldolase [ec:2.2.1.2]	R45		'G3P[c] + S7P[c] <--> E4P[c] + F6P[c]'	Transaldolase [ec:2.2.1.2]	R45		'G3P[c] + S7P[c] <--> E4P[c] + F6P[c]'	Transaldolase [ec:2.2.1.2]	R45		'G3P[c] + S7P[c] <--> E4P[c] + F6P[c]'	Transaldolase [ec:2.2.1.2]
R46		'X5P[c] + E4P[c] <--> F6P[c] + G3P[c]'	Transketolase [ec:2.2.1.1]	R46		'X5P[c] + E4P[c] <--> F6P[c] + G3P[c]'	Transketolase [ec:2.2.1.1]	R46		'X5P[c] + E4P[c] <--> F6P[c] + G3P[c]'	Transketolase [ec:2.2.1.1]	R46		'X5P[c] + E4P[c] <--> F6P[c] + G3P[c]'	Transketolase [ec:2.2.1.1]	R46		'X5P[c] + E4P[c] <--> F6P[c] + G3P[c]'	Transketolase [ec:2.2.1.1]
R47		'G6P[c] <--> F6P[c]'	Glucose-6-phosphate isomerase [ec:5.3.1.9]	R47		'G6P[c] <--> F6P[c]'	Glucose-6-phosphate isomerase [ec:5.3.1.9]	R47		'G6P[c] <--> F6P[c]'	Glucose-6-phosphate isomerase [ec:5.3.1.9]	R47		'G6P[c] <--> F6P[c]'	Glucose-6-phosphate isomerase [ec:5.3.1.9]	R47		'G6P[c] <--> F6P[c]'	Glucose-6-phosphate isomerase [ec:5.3.1.9]
R48		'F16BP[c] --> F6P[c] + Pi[c]'	Fructose-bisphosphatase [ec:3.1.3.11]	R48		'F16BP[c] --> F6P[c] + Pi[c]'	Fructose-bisphosphatase [ec:3.1.3.11]	R48		'F16BP[c] --> F6P[c] + Pi[c]'	Fructose-bisphosphatase [ec:3.1.3.11]	R48		'F16BP[c] --> F6P[c] + Pi[c]'	Fructose-bisphosphatase [ec:3.1.3.11]	R48		'F16BP[c] --> F6P[c] + Pi[c]'	Fructose-bisphosphatase [ec:3.1.3.11]
R49		'F16BP[c] <--> G3P[c] + DHAP[c]'	Fructose-bisphosphate aldolase [ec:4.1.2.13]	R49		'F16BP[c] <--> G3P[c] + DHAP[c]'	Fructose-bisphosphate aldolase [ec:4.1.2.13]	R49		'F16BP[c] <--> G3P[c] + DHAP[c]'	Fructose-bisphosphate aldolase [ec:4.1.2.13]	R49		'F16BP[c] <--> G3P[c] + DHAP[c]'	Fructose-bisphosphate aldolase [ec:4.1.2.13]	R49		'F16BP[c] <--> G3P[c] + DHAP[c]'	Fructose-bisphosphate aldolase [ec:4.1.2.13]
R50		'GLY3P[c] + NAD[c] --> DHAP[c] + NADH[c]'	Glycerol-3-phosphate dehydrogenase [ec:1.1.1.8]	R50		'GLY3P[c] + NAD[c] --> DHAP[c] + NADH[c]'	Glycerol-3-phosphate dehydrogenase [ec:1.1.1.8]	R50		'GLY3P[c] + NAD[c] --> DHAP[c] + NADH[c]'	Glycerol-3-phosphate dehydrogenase [ec:1.1.1.8]	R50		'GLY3P[c] + NAD[c] --> DHAP[c] + NADH[c]'	Glycerol-3-phosphate dehydrogenase [ec:1.1.1.8]	R50		'GLY3P[c] + NAD[c] --> DHAP[c] + NADH[c]'	Glycerol-3-phosphate dehydrogenase [ec:1.1.1.8]
R51		'DHAP[c] <--> G3P[c]'	Triose-phosphate isomerase [ec:5.3.1.1]	R51		'DHAP[c] <--> G3P[c]'	Triose-phosphate isomerase [ec:5.3.1.1]	R51		'DHAP[c] <--> G3P[c]'	Triose-phosphate isomerase [ec:5.3.1.1]	R51		'DHAP[c] <--> G3P[c]'	Triose-phosphate isomerase [ec:5.3.1.1]	R51		'DHAP[c] <--> G3P[c]'	Triose-phosphate isomerase [ec:5.3.1.1]
R52		'G3P[c] + NAD[c] + Pi[c] <--> BPG[c] + NADH[c]'	Glyceraldehyde 3-phosphate dehydrogenase [ec:1.2.1.12]	R52		'G3P[c] + NAD[c] + Pi[c] <--> BPG[c] + NADH[c]'	Glyceraldehyde 3-phosphate dehydrogenase [ec:1.2.1.12]	R52		'G3P[c] + NAD[c] + Pi[c] <--> BPG[c] + NADH[c]'	Glyceraldehyde 3-phosphate dehydrogenase [ec:1.2.1.12]	R52		'G3P[c] + NAD[c] + Pi[c] <--> BPG[c] + NADH[c]'	Glyceraldehyde 3-phosphate dehydrogenase [ec:1.2.1.12]	R52		'G3P[c] + NAD[c] + Pi[c] <--> BPG[c] + NADH[c]'	Glyceraldehyde 3-phosphate dehydrogenase [ec:1.2.1.12]
R53		'BPG[c] + ADP[c] <--> 3-PG[c] + ATP[c]'	Phosphoglycerate kinase [ec:2.7.2.3]	R53		'BPG[c] + ADP[c] <--> 3-PG[c] + ATP[c]'	Phosphoglycerate kinase [ec:2.7.2.3]	R53		'BPG[c] + ADP[c] <--> 3-PG[c] + ATP[c]'	Phosphoglycerate kinase [ec:2.7.2.3]	R53		'BPG[c] + ADP[c] <--> 3-PG[c] + ATP[c]'	Phosphoglycerate kinase [ec:2.7.2.3]	R53		'BPG[c] + ADP[c] <--> 3-PG[c] + ATP[c]'	Phosphoglycerate kinase [ec:2.7.2.3]
R54		'3-PG[c] <--> 2-PG[c]'	Phosphoglycerate mutase [ec:5.4.2.1]	R54		'3-PG[c] <--> 2-PG[c]'	Phosphoglycerate mutase [ec:5.4.2.1]	R54		'3-PG[c] <--> 2-PG[c]'	Phosphoglycerate mutase [ec:5.4.2.1]	R54		'3-PG[c] <--> 2-PG[c]'	Phosphoglycerate mutase [ec:5.4.2.1]	R54		'3-PG[c] <--> 2-PG[c]'	Phosphoglycerate mutase [ec:5.4.2.1]
R55		'2-PG[c] <--> PEP[c]'	Phosphopyruvate hydratase [ec:4.2.1.11]	R55		'2-PG[c] <--> PEP[c]'	Phosphopyruvate hydratase [ec:4.2.1.11]	R55		'2-PG[c] <--> PEP[c]'	Phosphopyruvate hydratase [ec:4.2.1.11]	R55		'2-PG[c] <--> PEP[c]'	Phosphopyruvate hydratase [ec:4.2.1.11]	R55		'2-PG[c] <--> PEP[c]'	Phosphopyruvate hydratase [ec:4.2.1.11]
R56		'PEP[c] + ADP[c] --> PYR[c] + ATP[c]'	Pyruvate kinase [ec:2.7.1.40]	R56		'PEP[c] + ADP[c] --> PYR[c] + ATP[c]'	Pyruvate kinase [ec:2.7.1.40]	R56		'PEP[c] + ADP[c] --> PYR[c] + ATP[c]'	Pyruvate kinase [ec:2.7.1.40]	R56		'PEP[c] + ADP[c] --> PYR[c] + ATP[c]'	Pyruvate kinase [ec:2.7.1.40]	R56		'PEP[c] + ADP[c] --> PYR[c] + ATP[c]'	Pyruvate kinase [ec:2.7.1.40]
R57		'PYR[c] + ATP[c] --> PEP[c] + AMP[c] + Pi[c]'	Phosphoenolpyruvate synthase [ec:2.7.9.2]	R57		'PYR[c] + ATP[c] --> PEP[c] + AMP[c] + Pi[c]'	Phosphoenolpyruvate synthase [ec:2.7.9.2]	R57		'PYR[c] + ATP[c] --> PEP[c] + AMP[c] + Pi[c]'	Phosphoenolpyruvate synthase [ec:2.7.9.2]	R57		'PYR[c] + ATP[c] --> PEP[c] + AMP[c] + Pi[c]'	Phosphoenolpyruvate synthase [ec:2.7.9.2]	R57		'PYR[c] + ATP[c] --> PEP[c] + AMP[c] + Pi[c]'	Phosphoenolpyruvate synthase [ec:2.7.9.2]
R58		'PYR[c] + NAD[c] + H-CoA[c] --> AC-CoA[c] + NADH[c] + CO2[c]'	Pyruvate dehydrogenase complex [ec:1.2.4.1&ec:2.3.1.12&ec:1.8.1.4]	R58		'PYR[c] + NAD[c] + H-CoA[c] --> AC-CoA[c] + NADH[c] + CO2[c]'	Pyruvate dehydrogenase complex [ec:1.2.4.1&ec:2.3.1.12&ec:1.8.1.4]	R58		'PYR[c] + NAD[c] + H-CoA[c] --> AC-CoA[c] + NADH[c] + CO2[c]'	Pyruvate dehydrogenase complex [ec:1.2.4.1&ec:2.3.1.12&ec:1.8.1.4]	R58		'PYR[c] + NAD[c] + H-CoA[c] --> AC-CoA[c] + NADH[c] + CO2[c]'	Pyruvate dehydrogenase complex [ec:1.2.4.1&ec:2.3.1.12&ec:1.8.1.4]	R58		'PYR[c] + NAD[c] + H-CoA[c] --> AC-CoA[c] + NADH[c] + CO2[c]'	Pyruvate dehydrogenase complex [ec:1.2.4.1&ec:2.3.1.12&ec:1.8.1.4]
R59		'PEP[c] + CO2[c] --> OXA[c] + Pi[c]'	Phosphoenolpyruvate carboxylase [ec:4.1.1.31]	R59		'PEP[c] + CO2[c] --> OXA[c] + Pi[c]'	Phosphoenolpyruvate carboxylase [ec:4.1.1.31]	R59		'PEP[c] + CO2[c] --> OXA[c] + Pi[c]'	Phosphoenolpyruvate carboxylase [ec:4.1.1.31]	R59		'PEP[c] + CO2[c] --> OXA[c] + Pi[c]'	Phosphoenolpyruvate carboxylase [ec:4.1.1.31]	R59		'PEP[c] + CO2[c] --> OXA[c] + Pi[c]'	Phosphoenolpyruvate carboxylase [ec:4.1.1.31]
R60		'PYR[c] + ATP[c] + CO2[c] <--> OXA[c] + ADP[c] + Pi[c]'	Pyruvate carboxylase [ec:6.4.1.1]	R60		'PYR[c] + ATP[c] + CO2[c] <--> OXA[c] + ADP[c] + Pi[c]'	Pyruvate carboxylase [ec:6.4.1.1]	R60		'PYR[c] + ATP[c] + CO2[c] <--> OXA[c] + ADP[c] + Pi[c]'	Pyruvate carboxylase [ec:6.4.1.1]	R60		'PYR[c] + ATP[c] + CO2[c] <--> OXA[c] + ADP[c] + Pi[c]'	Pyruvate carboxylase [ec:6.4.1.1]	R60		'PYR[c] + ATP[c] + CO2[c] <--> OXA[c] + ADP[c] + Pi[c]'	Pyruvate carboxylase [ec:6.4.1.1]
R61		'OXA[c] + ATP[c] --> PEP[c] + ADP[c] + CO2[c]'	Phosphoenolpyruvate carboxykinase [ec:4.1.1.49]	R61		'OXA[c] + ATP[c] --> PEP[c] + ADP[c] + CO2[c]'	Phosphoenolpyruvate carboxykinase [ec:4.1.1.49]	R61		'OXA[c] + ATP[c] --> PEP[c] + ADP[c] + CO2[c]'	Phosphoenolpyruvate carboxykinase [ec:4.1.1.49]	R61		'OXA[c] + ATP[c] --> PEP[c] + ADP[c] + CO2[c]'	Phosphoenolpyruvate carboxykinase [ec:4.1.1.49]	R61		'OXA[c] + ATP[c] --> PEP[c] + ADP[c] + CO2[c]'	Phosphoenolpyruvate carboxykinase [ec:4.1.1.49]
R62		'OXA[c] + AC-CoA[c] --> CIT[c] + H-CoA[c]'	Citrate synthase [ec:2.3.3.1]	R62		'OXA[c] + AC-CoA[c] --> CIT[c] + H-CoA[c]'	Citrate synthase [ec:2.3.3.1]	R62		'OXA[c] + AC-CoA[c] --> CIT[c] + H-CoA[c]'	Citrate synthase [ec:2.3.3.1]	R62		'OXA[c] + AC-CoA[c] --> CIT[c] + H-CoA[c]'	Citrate synthase [ec:2.3.3.1]	R62		'OXA[c] + AC-CoA[c] --> CIT[c] + H-CoA[c]'	Citrate synthase [ec:2.3.3.1]
R63		'CIT[c] <--> ISC[c]'	Aconitase [ec:4.2.1.3]	R63		'CIT[c] <--> ISC[c]'	Aconitase [ec:4.2.1.3]	R63		'CIT[c] <--> ISC[c]'	Aconitase [ec:4.2.1.3]	R63		'CIT[c] <--> ISC[c]'	Aconitase [ec:4.2.1.3]	R63		'CIT[c] <--> ISC[c]'	Aconitase [ec:4.2.1.3]
R64		'ISC[c] + NAD[c] --> aKG[c] + NADH[c] + CO2[c]'	Isocitrate dehydrogenase (NAD dependent) [ec:1.1.1.41]	R64		'ISC[c] + NAD[c] --> aKG[c] + NADH[c] + CO2[c]'	Isocitrate dehydrogenase (NAD dependent) [ec:1.1.1.41]	R64		'ISC[c] + NAD[c] --> aKG[c] + NADH[c] + CO2[c]'	Isocitrate dehydrogenase (NAD dependent) [ec:1.1.1.41]	R64		'ISC[c] + NAD[c] --> aKG[c] + NADH[c] + CO2[c]'	Isocitrate dehydrogenase (NAD dependent) [ec:1.1.1.41]	R64		'ISC[c] + NAD[c] --> aKG[c] + NADH[c] + CO2[c]'	Isocitrate dehydrogenase (NAD dependent) [ec:1.1.1.41]
R65		'aKG[c] + H-CoA[c] + NAD[c] --> SUC-CoA[c] + CO2[c] + NADH[c]'	α-ketoglutarate dehydrogenase [ec:1.2.4.2&2.3.1.61]	R65		'aKG[c] + H-CoA[c] + NAD[c] --> SUC-CoA[c] + CO2[c] + NADH[c]'	α-ketoglutarate dehydrogenase [ec:1.2.4.2&2.3.1.61]	R65		'aKG[c] + H-CoA[c] + NAD[c] --> SUC-CoA[c] + CO2[c] + NADH[c]'	α-ketoglutarate dehydrogenase [ec:1.2.4.2&2.3.1.61]	R65		'aKG[c] + H-CoA[c] + NAD[c] --> SUC-CoA[c] + CO2[c] + NADH[c]'	α-ketoglutarate dehydrogenase [ec:1.2.4.2&2.3.1.61]	R65		'aKG[c] + H-CoA[c] + NAD[c] --> SUC-CoA[c] + CO2[c] + NADH[c]'	α-ketoglutarate dehydrogenase [ec:1.2.4.2&2.3.1.61]
R66		'SUC-CoA[c] + ADP[c] + Pi[c] <--> SUC[c] + H-CoA[c] + ATP[c]'	Succinyl-CoA synthetase [ec:6.2.1.5]	R66		'SUC-CoA[c] + ADP[c] + Pi[c] <--> SUC[c] + H-CoA[c] + ATP[c]'	Succinyl-CoA synthetase [ec:6.2.1.5]	R66		'SUC-CoA[c] + ADP[c] + Pi[c] <--> SUC[c] + H-CoA[c] + ATP[c]'	Succinyl-CoA synthetase [ec:6.2.1.5]	R66		'SUC-CoA[c] + ADP[c] + Pi[c] <--> SUC[c] + H-CoA[c] + ATP[c]'	Succinyl-CoA synthetase [ec:6.2.1.5]	R66		'SUC-CoA[c] + ADP[c] + Pi[c] <--> SUC[c] + H-CoA[c] + ATP[c]'	Succinyl-CoA synthetase [ec:6.2.1.5]
R67		'SUC[c] + FAD[c] <--> FUM[c] + FADH2[c]'	Fumarate reductase [ec:1.3.5.4]	R67		'SUC[c] + FAD[c] <--> FUM[c] + FADH2[c]'	Fumarate reductase [ec:1.3.5.4]	R67		'SUC[c] + FAD[c] <--> FUM[c] + FADH2[c]'	Fumarate reductase [ec:1.3.5.4]	R67		'SUC[c] + FAD[c] <--> FUM[c] + FADH2[c]'	Fumarate reductase [ec:1.3.5.4]	R67		'SUC[c] + FAD[c] <--> FUM[c] + FADH2[c]'	Fumarate reductase [ec:1.3.5.4]
R68		'SUC[c] + UQ[c] --> FUM[c] + UQH2[c]'	Succinate dehydrogenase [ec:1.3.5.1]	R68		'SUC[c] + UQ[c] --> FUM[c] + UQH2[c]'	Succinate dehydrogenase [ec:1.3.5.1]	R68		'SUC[c] + UQ[c] --> FUM[c] + UQH2[c]'	Succinate dehydrogenase [ec:1.3.5.1]	R68		'SUC[c] + UQ[c] --> FUM[c] + UQH2[c]'	Succinate dehydrogenase [ec:1.3.5.1]	R68		'SUC[c] + UQ[c] --> FUM[c] + UQH2[c]'	Succinate dehydrogenase [ec:1.3.5.1]
R69		'FUM[c] <--> MAL[c]'	Fumarase [ec:4.2.1.2]	R69		'FUM[c] <--> MAL[c]'	Fumarase [ec:4.2.1.2]	R69		'FUM[c] <--> MAL[c]'	Fumarase [ec:4.2.1.2]	R69		'FUM[c] <--> MAL[c]'	Fumarase [ec:4.2.1.2]	R69		'FUM[c] <--> MAL[c]'	Fumarase [ec:4.2.1.2]
R70		'MAL[c] + NAD[c] <--> OXA[c] + NADH[c]'	Malate dehydrogenase [ec:1.1.1.37]	R70		'MAL[c] + NAD[c] <--> OXA[c] + NADH[c]'	Malate dehydrogenase [ec:1.1.1.37]	R70		'MAL[c] + NAD[c] <--> OXA[c] + NADH[c]'	Malate dehydrogenase [ec:1.1.1.37]	R70		'MAL[c] + NAD[c] <--> OXA[c] + NADH[c]'	Malate dehydrogenase [ec:1.1.1.37]	R70		'MAL[c] + NAD[c] <--> OXA[c] + NADH[c]'	Malate dehydrogenase [ec:1.1.1.37]
R71		'MAL[c] + NADP[c] --> PYR[c] + CO2[c] + NADPH[c]'	Malic enzyme (NADP dependent) [ec:1.1.1.40]	R71		'MAL[c] + NADP[c] --> PYR[c] + CO2[c] + NADPH[c]'	Malic enzyme (NADP dependent) [ec:1.1.1.40]	R71		'MAL[c] + NADP[c] --> PYR[c] + CO2[c] + NADPH[c]'	Malic enzyme (NADP dependent) [ec:1.1.1.40]	R71		'MAL[c] + NADP[c] --> PYR[c] + CO2[c] + NADPH[c]'	Malic enzyme (NADP dependent) [ec:1.1.1.40]	R71		'MAL[c] + NADP[c] --> PYR[c] + CO2[c] + NADPH[c]'	Malic enzyme (NADP dependent) [ec:1.1.1.40]
R72		'ISC[c] --> GLYOX[c] + SUC[c]'	Isocitrate lyase [ec:4.1.3.1]	R72		'ISC[c] --> GLYOX[c] + SUC[c]'	Isocitrate lyase [ec:4.1.3.1]	R72		'ISC[c] --> GLYOX[c] + SUC[c]'	Isocitrate lyase [ec:4.1.3.1]	R72		'ISC[c] --> GLYOX[c] + SUC[c]'	Isocitrate lyase [ec:4.1.3.1]	R72		'ISC[c] --> GLYOX[c] + SUC[c]'	Isocitrate lyase [ec:4.1.3.1]
R73		'GLYOX[c] + AC-CoA[c] --> MAL[c] + H-CoA[c]'	Malate synthase [ec:2.3.3.9]	R73		'GLYOX[c] + AC-CoA[c] --> MAL[c] + H-CoA[c]'	Malate synthase [ec:2.3.3.9]	R73		'GLYOX[c] + AC-CoA[c] --> MAL[c] + H-CoA[c]'	Malate synthase [ec:2.3.3.9]	R73		'GLYOX[c] + AC-CoA[c] --> MAL[c] + H-CoA[c]'	Malate synthase [ec:2.3.3.9]	R73		'GLYOX[c] + AC-CoA[c] --> MAL[c] + H-CoA[c]'	Malate synthase [ec:2.3.3.9]
R74		'AC[c] + H-CoA[c] + ATP[c] --> AC-CoA[c] + AMP[c] + 2 Pi[c]'	Acetyl-CoA synthetase [ec:6.2.1.1]	R74		'AC[c] + H-CoA[c] + ATP[c] --> AC-CoA[c] + AMP[c] + 2 Pi[c]'	Acetyl-CoA synthetase [ec:6.2.1.1]	R74		'AC[c] + H-CoA[c] + ATP[c] --> AC-CoA[c] + AMP[c] + 2 Pi[c]'	Acetyl-CoA synthetase [ec:6.2.1.1]	R74		'AC[c] + H-CoA[c] + ATP[c] --> AC-CoA[c] + AMP[c] + 2 Pi[c]'	Acetyl-CoA synthetase [ec:6.2.1.1]	R74		'AC[c] + H-CoA[c] + ATP[c] --> AC-CoA[c] + AMP[c] + 2 Pi[c]'	Acetyl-CoA synthetase [ec:6.2.1.1]
R75		'2 AC-CoA[c] <--> ACAC-CoA[c] + H-CoA[c]'	Acetoacetyl-CoA thiolase [ec:2.3.1.9]	R75		'2 AC-CoA[c] <--> ACAC-CoA[c] + H-CoA[c]'	Acetoacetyl-CoA thiolase [ec:2.3.1.9]	R75		'2 AC-CoA[c] <--> ACAC-CoA[c] + H-CoA[c]'	Acetoacetyl-CoA thiolase [ec:2.3.1.9]	R75		'2 AC-CoA[c] <--> ACAC-CoA[c] + H-CoA[c]'	Acetoacetyl-CoA thiolase [ec:2.3.1.9]	R75		'2 AC-CoA[c] <--> ACAC-CoA[c] + H-CoA[c]'	Acetoacetyl-CoA thiolase [ec:2.3.1.9]
R76		'AC-CoA[c] + SUC[c] --> AC[c] + SUC-CoA[c]'	Succinyl-CoA:acetate CoA-transferase [ec:2.8.3.18]	R76		'AC-CoA[c] + SUC[c] --> AC[c] + SUC-CoA[c]'	Succinyl-CoA:acetate CoA-transferase [ec:2.8.3.18]	R76		'AC-CoA[c] + SUC[c] --> AC[c] + SUC-CoA[c]'	Succinyl-CoA:acetate CoA-transferase [ec:2.8.3.18]	R76		'AC-CoA[c] + SUC[c] --> AC[c] + SUC-CoA[c]'	Succinyl-CoA:acetate CoA-transferase [ec:2.8.3.18]	R76		'AC-CoA[c] + SUC[c] --> AC[c] + SUC-CoA[c]'	Succinyl-CoA:acetate CoA-transferase [ec:2.8.3.18]
R77		'ACAC[c] + SUC-CoA[c] <--> ACAC-CoA[c] + SUC[c]'	3-Oxoacid CoA-transferase [ec:2.8.3.5]	R77		'ACAC[c] + SUC-CoA[c] <--> ACAC-CoA[c] + SUC[c]'	3-Oxoacid CoA-transferase [ec:2.8.3.5]	R77		'ACAC[c] + SUC-CoA[c] <--> ACAC-CoA[c] + SUC[c]'	3-Oxoacid CoA-transferase [ec:2.8.3.5]	R77		'ACAC[c] + SUC-CoA[c] <--> ACAC-CoA[c] + SUC[c]'	3-Oxoacid CoA-transferase [ec:2.8.3.5]	R77		'ACAC[c] + SUC-CoA[c] <--> ACAC-CoA[c] + SUC[c]'	3-Oxoacid CoA-transferase [ec:2.8.3.5]
R78		'PYR[c] + H-CoA[c] --> AC-CoA[c] + FOR[c]'	Pyruvate formate lyase [ec:2.3.1.54]	R78		'PYR[c] + H-CoA[c] --> AC-CoA[c] + FOR[c]'	Pyruvate formate lyase [ec:2.3.1.54]	R78		'PYR[c] + H-CoA[c] --> AC-CoA[c] + FOR[c]'	Pyruvate formate lyase [ec:2.3.1.54]	R78		'PYR[c] + H-CoA[c] --> AC-CoA[c] + FOR[c]'	Pyruvate formate lyase [ec:2.3.1.54]	R78		'PYR[c] + H-CoA[c] --> AC-CoA[c] + FOR[c]'	Pyruvate formate lyase [ec:2.3.1.54]
R79		'FOR[c] + NAD[c] --> CO2[c] + NADH[c]'	Formate dehydrogenase [ec:1.17.1.9]	R79		'FOR[c] + NAD[c] --> CO2[c] + NADH[c]'	Formate dehydrogenase [ec:1.17.1.9]	R79		'FOR[c] + NAD[c] --> CO2[c] + NADH[c]'	Formate dehydrogenase [ec:1.17.1.9]	R79		'FOR[c] + NAD[c] --> CO2[c] + NADH[c]'	Formate dehydrogenase [ec:1.17.1.9]	R79		'FOR[c] + NAD[c] --> CO2[c] + NADH[c]'	Formate dehydrogenase [ec:1.17.1.9]
R80		'H-CoA[c] + ACP[c] --> AC-CoA[c] + Pi[c]'	Phosphate acetyltransferase [ec:2.3.1.8]	R80		'H-CoA[c] + ACP[c] --> AC-CoA[c] + Pi[c]'	Phosphate acetyltransferase [ec:2.3.1.8]	R80		'H-CoA[c] + ACP[c] --> AC-CoA[c] + Pi[c]'	Phosphate acetyltransferase [ec:2.3.1.8]	R80		'H-CoA[c] + ACP[c] --> AC-CoA[c] + Pi[c]'	Phosphate acetyltransferase [ec:2.3.1.8]	R80		'H-CoA[c] + ACP[c] --> AC-CoA[c] + Pi[c]'	Phosphate acetyltransferase [ec:2.3.1.8]
R81		'ACP[c] + ADP[c] --> AC[c] + ATP[c]'	Acetate kinase [ec:2.7.2.1]	R81		'ACP[c] + ADP[c] --> AC[c] + ATP[c]'	Acetate kinase [ec:2.7.2.1]	R81		'ACP[c] + ADP[c] --> AC[c] + ATP[c]'	Acetate kinase [ec:2.7.2.1]	R81		'ACP[c] + ADP[c] --> AC[c] + ATP[c]'	Acetate kinase [ec:2.7.2.1]	R81		'ACP[c] + ADP[c] --> AC[c] + ATP[c]'	Acetate kinase [ec:2.7.2.1]
R82		'AC-CoA[c] + NADH[c] <--> ACA[c] + NAD[c] + H-CoA[c]'	Acetaldehyde dehydrogenase [ec:1.2.1.10]	R82		'AC-CoA[c] + NADH[c] <--> ACA[c] + NAD[c] + H-CoA[c]'	Acetaldehyde dehydrogenase [ec:1.2.1.10]	R82		'AC-CoA[c] + NADH[c] <--> ACA[c] + NAD[c] + H-CoA[c]'	Acetaldehyde dehydrogenase [ec:1.2.1.10]	R82		'AC-CoA[c] + NADH[c] <--> ACA[c] + NAD[c] + H-CoA[c]'	Acetaldehyde dehydrogenase [ec:1.2.1.10]	R82		'AC-CoA[c] + NADH[c] <--> ACA[c] + NAD[c] + H-CoA[c]'	Acetaldehyde dehydrogenase [ec:1.2.1.10]
R83		'ACA[c] + NAD[c] --> AC[c] + NADH[c]'	Aldehyde dehydrogenase (NAD dependent) [ec:1.2.1.3]	R83		'ACA[c] + NAD[c] --> AC[c] + NADH[c]'	Aldehyde dehydrogenase (NAD dependent) [ec:1.2.1.3]	R83		'ACA[c] + NAD[c] --> AC[c] + NADH[c]'	Aldehyde dehydrogenase (NAD dependent) [ec:1.2.1.3]	R83		'ACA[c] + NAD[c] --> AC[c] + NADH[c]'	Aldehyde dehydrogenase (NAD dependent) [ec:1.2.1.3]	R83		'ACA[c] + NAD[c] --> AC[c] + NADH[c]'	Aldehyde dehydrogenase (NAD dependent) [ec:1.2.1.3]
R84		'ACA[c] + NADH[c] --> ETOH[c] + NAD[c]'	Alcohol dehydrogenase [ec:1.1.1.1]	R84		'ACA[c] + NADH[c] --> ETOH[c] + NAD[c]'	Alcohol dehydrogenase [ec:1.1.1.1]	R84		'ACA[c] + NADH[c] --> ETOH[c] + NAD[c]'	Alcohol dehydrogenase [ec:1.1.1.1]	R84		'ACA[c] + NADH[c] --> ETOH[c] + NAD[c]'	Alcohol dehydrogenase [ec:1.1.1.1]	R84		'ACA[c] + NADH[c] --> ETOH[c] + NAD[c]'	Alcohol dehydrogenase [ec:1.1.1.1]
R85		'PYR[c] + NADH[c] --> LAC[c] + NAD[c]'	Lactate dehydrogenase [ec:1.1.1.27]	R85		'PYR[c] + NADH[c] --> LAC[c] + NAD[c]'	Lactate dehydrogenase [ec:1.1.1.27]	R85		'PYR[c] + NADH[c] --> LAC[c] + NAD[c]'	Lactate dehydrogenase [ec:1.1.1.27]	R85		'PYR[c] + NADH[c] --> LAC[c] + NAD[c]'	Lactate dehydrogenase [ec:1.1.1.27]	R85		'PYR[c] + NADH[c] --> LAC[c] + NAD[c]'	Lactate dehydrogenase [ec:1.1.1.27]
R86		'ACAC[c] --> ACETONE[c] + CO2[c]'	Acetoacetate decarboxylase [ec:4.1.1.4]	R86		'ACAC[c] --> ACETONE[c] + CO2[c]'	Acetoacetate decarboxylase [ec:4.1.1.4]	R86		'ACAC[c] --> ACETONE[c] + CO2[c]'	Acetoacetate decarboxylase [ec:4.1.1.4]	R86		'ACAC[c] --> ACETONE[c] + CO2[c]'	Acetoacetate decarboxylase [ec:4.1.1.4]	R86		'ACAC[c] --> ACETONE[c] + CO2[c]'	Acetoacetate decarboxylase [ec:4.1.1.4]
R87		'ACAC-CoA[c] + NADPH[c] <--> 3-HBut-CoA[c] + NADP[c]'	3-Hydroxyacyl-CoA dehydrogenase [ec:1.1.1.35]	R87		'ACAC-CoA[c] + NADPH[c] <--> 3-HBut-CoA[c] + NADP[c]'	3-Hydroxyacyl-CoA dehydrogenase [ec:1.1.1.35]	R87		'ACAC-CoA[c] + NADPH[c] <--> 3-HBut-CoA[c] + NADP[c]'	3-Hydroxyacyl-CoA dehydrogenase [ec:1.1.1.35]	R87		'ACAC-CoA[c] + NADPH[c] <--> 3-HBut-CoA[c] + NADP[c]'	3-Hydroxyacyl-CoA dehydrogenase [ec:1.1.1.35]	R87		'ACAC-CoA[c] + NADPH[c] <--> 3-HBut-CoA[c] + NADP[c]'	3-Hydroxyacyl-CoA dehydrogenase [ec:1.1.1.35]
R88		'3-HBut-CoA[c] --> PHB[c] + H-CoA[c]'	Poly(3-hydroxybutyrate) synthase [ec:2.3.1.-]	R88		'3-HBut-CoA[c] --> PHB[c] + H-CoA[c]'	Poly(3-hydroxybutyrate) synthase [ec:2.3.1.-]	R88		'3-HBut-CoA[c] --> PHB[c] + H-CoA[c]'	Poly(3-hydroxybutyrate) synthase [ec:2.3.1.-]	R88		'3-HBut-CoA[c] --> PHB[c] + H-CoA[c]'	Poly(3-hydroxybutyrate) synthase [ec:2.3.1.-]	R88		'3-HBut-CoA[c] --> PHB[c] + H-CoA[c]'	Poly(3-hydroxybutyrate) synthase [ec:2.3.1.-]
R89		'PHB[c] + NAD[c] --> ACAC[c] + NADH[c]'	PHA depolymerase [ec:3.1.1.75]	R89		'PHB[c] + NAD[c] --> ACAC[c] + NADH[c]'	PHA depolymerase [ec:3.1.1.75]	R89		'PHB[c] + NAD[c] --> ACAC[c] + NADH[c]'	PHA depolymerase [ec:3.1.1.75]	R89		'PHB[c] + NAD[c] --> ACAC[c] + NADH[c]'	PHA depolymerase [ec:3.1.1.75]	R89		'PHB[c] + NAD[c] --> ACAC[c] + NADH[c]'	PHA depolymerase [ec:3.1.1.75]
R90		'aKG[c] + NADPH[c] + NH3[c] <--> GLU[c] + NADP[c]'	Glutamate dehydrogenase [ec:1.4.1.2]	R90		'aKG[c] + NADPH[c] + NH3[c] <--> GLU[c] + NADP[c]'	Glutamate dehydrogenase [ec:1.4.1.2]	R90		'aKG[c] + NADPH[c] + NH3[c] <--> GLU[c] + NADP[c]'	Glutamate dehydrogenase [ec:1.4.1.2]	R90		'aKG[c] + NADPH[c] + NH3[c] <--> GLU[c] + NADP[c]'	Glutamate dehydrogenase [ec:1.4.1.2]	R90		'aKG[c] + NADPH[c] + NH3[c] <--> GLU[c] + NADP[c]'	Glutamate dehydrogenase [ec:1.4.1.2]
R91		'GLU[c] + NH3[c] + ATP[c] <--> GLN[c] + ADP[c] + Pi[c]'	Glutamine synthase [ec:6.3.1.2]	R91		'GLU[c] + NH3[c] + ATP[c] <--> GLN[c] + ADP[c] + Pi[c]'	Glutamine synthase [ec:6.3.1.2]	R91		'GLU[c] + NH3[c] + ATP[c] <--> GLN[c] + ADP[c] + Pi[c]'	Glutamine synthase [ec:6.3.1.2]	R91		'GLU[c] + NH3[c] + ATP[c] <--> GLN[c] + ADP[c] + Pi[c]'	Glutamine synthase [ec:6.3.1.2]	R91		'GLU[c] + NH3[c] + ATP[c] <--> GLN[c] + ADP[c] + Pi[c]'	Glutamine synthase [ec:6.3.1.2]
R92		'0.021 G6P[c] + 0.007 F6P[c] + 0.09 R5P[c] + 0.036 E4P[c] + 0.013 G3P[c] + 0.15 3-PG[c] + 0.052 PEP[c] + 0.283 PYR[c] + 0.374 AC-CoA[c] + 0.179 OXA[c] + 0.832 GLU[c] + 0.025 GLN[c] + 4.11 ATP[c] + 0.826 NADPH[c] + 0.312 NAD[c] --> BIOMASS[c] + 0.751 aKG[c] + 0.261 CO2[c] + 0.374 H-CoA[c] + 4.11 ADP[c] + 4.479 Pi[c] + 0.826 NADP[c] + 0.312 NADH[c]'	Biomass formation	R92		'0.021 G6P[c] + 0.007 F6P[c] + 0.09 R5P[c] + 0.036 E4P[c] + 0.013 G3P[c] + 0.15 3-PG[c] + 0.052 PEP[c] + 0.283 PYR[c] + 0.374 AC-CoA[c] + 0.179 OXA[c] + 0.832 GLU[c] + 0.025 GLN[c] + 4.11 ATP[c] + 0.826 NADPH[c] + 0.312 NAD[c] --> BIOMASS[c] + 0.751 aKG[c] + 0.261 CO2[c] + 0.374 H-CoA[c] + 4.11 ADP[c] + 4.479 Pi[c] + 0.826 NADP[c] + 0.312 NADH[c]'	Biomass formation	R92		'0.021 G6P[c] + 0.007 F6P[c] + 0.09 R5P[c] + 0.036 E4P[c] + 0.013 G3P[c] + 0.15 3-PG[c] + 0.052 PEP[c] + 0.283 PYR[c] + 0.374 AC-CoA[c] + 0.179 OXA[c] + 0.832 GLU[c] + 0.025 GLN[c] + 4.11 ATP[c] + 0.826 NADPH[c] + 0.312 NAD[c] --> BIOMASS[c] + 0.751 aKG[c] + 0.261 CO2[c] + 0.374 H-CoA[c] + 4.11 ADP[c] + 4.479 Pi[c] + 0.826 NADP[c] + 0.312 NADH[c]'	Biomass formation	R92		'0.021 G6P[c] + 0.007 F6P[c] + 0.09 R5P[c] + 0.036 E4P[c] + 0.013 G3P[c] + 0.15 3-PG[c] + 0.052 PEP[c] + 0.283 PYR[c] + 0.374 AC-CoA[c] + 0.179 OXA[c] + 0.832 GLU[c] + 0.025 GLN[c] + 4.11 ATP[c] + 0.826 NADPH[c] + 0.312 NAD[c] --> BIOMASS[c] + 0.751 aKG[c] + 0.261 CO2[c] + 0.374 H-CoA[c] + 4.11 ADP[c] + 4.479 Pi[c] + 0.826 NADP[c] + 0.312 NADH[c]'	Biomass formation	R92		'0.021 G6P[c] + 0.007 F6P[c] + 0.09 R5P[c] + 0.036 E4P[c] + 0.013 G3P[c] + 0.15 3-PG[c] + 0.052 PEP[c] + 0.283 PYR[c] + 0.374 AC-CoA[c] + 0.179 OXA[c] + 0.832 GLU[c] + 0.025 GLN[c] + 4.11 ATP[c] + 0.826 NADPH[c] + 0.312 NAD[c] --> BIOMASS[c] + 0.751 aKG[c] + 0.261 CO2[c] + 0.374 H-CoA[c] + 4.11 ADP[c] + 4.479 Pi[c] + 0.826 NADP[c] + 0.312 NADH[c]'	Biomass formation
R93		'NADH[c] + FAD[c] --> NAD[c] + FADH2[c]'	Flavin reductase (NAD dependent) [ec:1.5.1.36]	R93		'NADH[c] + FAD[c] --> NAD[c] + FADH2[c]'	Flavin reductase (NAD dependent) [ec:1.5.1.36]	R93		'NADH[c] + FAD[c] --> NAD[c] + FADH2[c]'	Flavin reductase (NAD dependent) [ec:1.5.1.36]	R93		'NADH[c] + FAD[c] --> NAD[c] + FADH2[c]'	Flavin reductase (NAD dependent) [ec:1.5.1.36]	R93		'NADH[c] + FAD[c] --> NAD[c] + FADH2[c]'	Flavin reductase (NAD dependent) [ec:1.5.1.36]
R94		'NADPH[c] + NAD[c] --> NADP[c] + NADH[c]'	NAD(P) transhydrogenase [ec:1.6.1.3]	R94		'NADPH[c] + NAD[c] --> NADP[c] + NADH[c]'	NAD(P) transhydrogenase [ec:1.6.1.3]	R94		'NADPH[c] + NAD[c] --> NADP[c] + NADH[c]'	NAD(P) transhydrogenase [ec:1.6.1.3]	R94		'NADPH[c] + NAD[c] --> NADP[c] + NADH[c]'	NAD(P) transhydrogenase [ec:1.6.1.3]	R94		'NADPH[c] + NAD[c] --> NADP[c] + NADH[c]'	NAD(P) transhydrogenase [ec:1.6.1.3]
R95		'NADH[c] + NADP[c] + H[e] --> NAD[c] + NADPH[c] + H[c]'	NAD(P) transhydrogenase (Re/Si-specific) [ec:1.6.1.2]	R95		'NADH[c] + NADP[c] + H[e] --> NAD[c] + NADPH[c] + H[c]'	NAD(P) transhydrogenase (Re/Si-specific) [ec:1.6.1.2]	R95		'NADH[c] + NADP[c] + H[e] --> NAD[c] + NADPH[c] + H[c]'	NAD(P) transhydrogenase (Re/Si-specific) [ec:1.6.1.2]	R95		'NADH[c] + NADP[c] + H[e] --> NAD[c] + NADPH[c] + H[c]'	NAD(P) transhydrogenase (Re/Si-specific) [ec:1.6.1.2]	R95		'NADH[c] + NADP[c] + H[e] --> NAD[c] + NADPH[c] + H[c]'	NAD(P) transhydrogenase (Re/Si-specific) [ec:1.6.1.2]
R96		'H2[c] + NAD[c] --> NADH[c]'	Hydrogen dehydrogenase [ec:1.12.1.2]	R96		'H2[c] + NAD[c] --> NADH[c]'	Hydrogen dehydrogenase [ec:1.12.1.2]	R96		'H2[c] + NAD[c] --> NADH[c]'	Hydrogen dehydrogenase [ec:1.12.1.2]	R96		'H2[c] + NAD[c] --> NADH[c]'	Hydrogen dehydrogenase [ec:1.12.1.2]	R96		'H2[c] + NAD[c] --> NADH[c]'	Hydrogen dehydrogenase [ec:1.12.1.2]
R97		'UQ[c] + H2[c] --> UQH2[c]'	Hydrogen dehydrogenase [ec:1.12.99.6]	R97		'UQ[c] + H2[c] --> UQH2[c]'	Hydrogen dehydrogenase [ec:1.12.99.6]	R97		'UQ[c] + H2[c] --> UQH2[c]'	Hydrogen dehydrogenase [ec:1.12.99.6]	R97		'UQ[c] + H2[c] --> UQH2[c]'	Hydrogen dehydrogenase [ec:1.12.99.6]	R97		'UQ[c] + H2[c] --> UQH2[c]'	Hydrogen dehydrogenase [ec:1.12.99.6]
R98		'NADH[c] + UQ[c] --> NAD[c] + UQH2[c]'	NADH-quinone oxidoreductase [ec:1.6.5.9]	R98		'NADH[c] + UQ[c] --> NAD[c] + UQH2[c]'	NADH-quinone oxidoreductase [ec:1.6.5.9]	R98		'NADH[c] + UQ[c] --> NAD[c] + UQH2[c]'	NADH-quinone oxidoreductase [ec:1.6.5.9]	R98		'NADH[c] + UQ[c] --> NAD[c] + UQH2[c]'	NADH-quinone oxidoreductase [ec:1.6.5.9]	R98		'NADH[c] + UQ[c] --> NAD[c] + UQH2[c]'	NADH-quinone oxidoreductase [ec:1.6.5.9]
R99		'NADH[c] + UQ[c] + 4 H[c] --> NAD[c] + UQH2[c] + 4 H[e]'	NADH-quinone oxidoreductase [ec:7.1.1.2]	R99		'NADH[c] + UQ[c] + 4 H[c] --> NAD[c] + UQH2[c] + 4 H[e]'	NADH-quinone oxidoreductase [ec:7.1.1.2]	R99		'NADH[c] + UQ[c] + 4 H[c] --> NAD[c] + UQH2[c] + 4 H[e]'	NADH-quinone oxidoreductase [ec:7.1.1.2]	R99		'NADH[c] + UQ[c] + 4 H[c] --> NAD[c] + UQH2[c] + 4 H[e]'	NADH-quinone oxidoreductase [ec:7.1.1.2]	R99		'NADH[c] + UQ[c] + 4 H[c] --> NAD[c] + UQH2[c] + 4 H[e]'	NADH-quinone oxidoreductase [ec:7.1.1.2]
R100		'UQH2[c] + 4 H[c] + 0.5 O2[c] --> UQ[c] + 4 H[e]'	Cytochrome bd oxidase [ec:7.1.1.7]	R100		'UQH2[c] + 4 H[c] + 0.5 O2[c] --> UQ[c] + 4 H[e]'	Cytochrome bd oxidase [ec:7.1.1.7]	R100		'UQH2[c] + 4 H[c] + 0.5 O2[c] --> UQ[c] + 4 H[e]'	Cytochrome bd oxidase [ec:7.1.1.7]	R100		'UQH2[c] + 4 H[c] + 0.5 O2[c] --> UQ[c] + 4 H[e]'	Cytochrome bd oxidase [ec:7.1.1.7]	R100		'UQH2[c] + 4 H[c] + 0.5 O2[c] --> UQ[c] + 4 H[e]'	Cytochrome bd oxidase [ec:7.1.1.7]
R101		'UQH2[c] + 2 H[c] + 0.5 O2[c] --> UQ[c] + 2 H[e]'	Cytochrome bo oxidase [ec:7.1.1.3]	R101		'UQH2[c] + 2 H[c] + 0.5 O2[c] --> UQ[c] + 2 H[e]'	Cytochrome bo oxidase [ec:7.1.1.3]	R101		'UQH2[c] + 2 H[c] + 0.5 O2[c] --> UQ[c] + 2 H[e]'	Cytochrome bo oxidase [ec:7.1.1.3]	R101		'UQH2[c] + 2 H[c] + 0.5 O2[c] --> UQ[c] + 2 H[e]'	Cytochrome bo oxidase [ec:7.1.1.3]	R101		'UQH2[c] + 2 H[c] + 0.5 O2[c] --> UQ[c] + 2 H[e]'	Cytochrome bo oxidase [ec:7.1.1.3]
R102		'ADP[c] + 4 H[e] + Pi[c] --> ATP[c] + 4 H[c]'	ATP synthase [ec:3.6.3.14]	R102		'ADP[c] + 4 H[e] + Pi[c] --> ATP[c] + 4 H[c]'	ATP synthase [ec:3.6.3.14]	R102		'ADP[c] + 4 H[e] + Pi[c] --> ATP[c] + 4 H[c]'	ATP synthase [ec:3.6.3.14]	R102		'ADP[c] + 4 H[e] + Pi[c] --> ATP[c] + 4 H[c]'	ATP synthase [ec:3.6.3.14]	R102		'ADP[c] + 4 H[e] + Pi[c] --> ATP[c] + 4 H[c]'	ATP synthase [ec:3.6.3.14]
R103		'ADP[c] + 3 H[e] + Pi[c] <-- ATP[c] + 3 H[c]'	reverse ATP synthase (proton pump) [ec:3.6.3.14]	R103		'ADP[c] + 3 H[e] + Pi[c] <-- ATP[c] + 3 H[c]'	reverse ATP synthase (proton pump) [ec:3.6.3.14]	R103		'ADP[c] + 3 H[e] + Pi[c] <-- ATP[c] + 3 H[c]'	reverse ATP synthase (proton pump) [ec:3.6.3.14]	R103		'ADP[c] + 3 H[e] + Pi[c] <-- ATP[c] + 3 H[c]'	reverse ATP synthase (proton pump) [ec:3.6.3.14]	R103		'ADP[c] + 3 H[e] + Pi[c] <-- ATP[c] + 3 H[c]'	reverse ATP synthase (proton pump) [ec:3.6.3.14]
R104		'AMP[c] + ATP[c] --> 2 ADP[c]'	Adenylate kinase [ec:2.7.4.3]	R104		'AMP[c] + ATP[c] --> 2 ADP[c]'	Adenylate kinase [ec:2.7.4.3]	R104		'AMP[c] + ATP[c] --> 2 ADP[c]'	Adenylate kinase [ec:2.7.4.3]	R104		'AMP[c] + ATP[c] --> 2 ADP[c]'	Adenylate kinase [ec:2.7.4.3]	R104		'AMP[c] + ATP[c] --> 2 ADP[c]'	Adenylate kinase [ec:2.7.4.3]
R105		'GLYOX[c] + NADH[c] --> GA[c] + NAD[c]'	Glyoxylate reductase [ec:1.1.1.26]	R105		'GLYOX[c] + NADH[c] --> GA[c] + NAD[c]'	Glyoxylate reductase [ec:1.1.1.26]	R105		'GLYOX[c] + NADH[c] --> GA[c] + NAD[c]'	Glyoxylate reductase [ec:1.1.1.26]	R105		'GLYOX[c] + NADH[c] --> GA[c] + NAD[c]'	Glyoxylate reductase [ec:1.1.1.26]	R105		'GLYOX[c] + NADH[c] --> GA[c] + NAD[c]'	Glyoxylate reductase [ec:1.1.1.26]
R106		'GLYOX[c] + NADPH[c] --> GA[c] + NADP[c]'	Glyoxylate reductase [ec:1.1.1.79]	R106		'GLYOX[c] + NADPH[c] --> GA[c] + NADP[c]'	Glyoxylate reductase [ec:1.1.1.79]	R106		'GLYOX[c] + NADPH[c] --> GA[c] + NADP[c]'	Glyoxylate reductase [ec:1.1.1.79]	R106		'GLYOX[c] + NADPH[c] --> GA[c] + NADP[c]'	Glyoxylate reductase [ec:1.1.1.79]	R106		'GLYOX[c] + NADPH[c] --> GA[c] + NADP[c]'	Glyoxylate reductase [ec:1.1.1.79]
R107		'GA[c] + AC-CoA[c] <--> Glycolyl-CoA[c] + AC[c]'	Propionate CoA-transferase [ec:2.8.3.1]	R107		'GA[c] + AC-CoA[c] <--> Glycolyl-CoA[c] + AC[c]'	Propionate CoA-transferase [ec:2.8.3.1]	R107		'GA[c] + AC-CoA[c] <--> Glycolyl-CoA[c] + AC[c]'	Propionate CoA-transferase [ec:2.8.3.1]	R107		'GA[c] + AC-CoA[c] <--> Glycolyl-CoA[c] + AC[c]'	Propionate CoA-transferase [ec:2.8.3.1]	R107		'GA[c] + AC-CoA[c] <--> Glycolyl-CoA[c] + AC[c]'	Propionate CoA-transferase [ec:2.8.3.1]
R108		'Glycolyl-CoA[c] --> P-G[c] + H-CoA[c]'	Poly(hydroxyalkanoate) synthase [ec:2.3.1.-]	R108		'Glycolyl-CoA[c] --> P-G[c] + H-CoA[c]'	Poly(hydroxyalkanoate) synthase [ec:2.3.1.-]	R108		'Glycolyl-CoA[c] --> P-G[c] + H-CoA[c]'	Poly(hydroxyalkanoate) synthase [ec:2.3.1.-]	R108		'Glycolyl-CoA[c] --> P-G[c] + H-CoA[c]'	Poly(hydroxyalkanoate) synthase [ec:2.3.1.-]	R108		'Glycolyl-CoA[c] --> P-G[c] + H-CoA[c]'	Poly(hydroxyalkanoate) synthase [ec:2.3.1.-]
	};				};				};				};				};
	mnet = CalculateFluxModes(ReactionFormulas,CreateFluxModeOpts('parse-only',true));				mnet = CalculateFluxModes(ReactionFormulas,CreateFluxModeOpts('parse-only',true));				mnet = CalculateFluxModes(ReactionFormulas,CreateFluxModeOpts('parse-only',true));				mnet = CalculateFluxModes(ReactionFormulas,CreateFluxModeOpts('parse-only',true));				mnet = CalculateFluxModes(ReactionFormulas,CreateFluxModeOpts('parse-only',true));

## Sheet: P2HP
	C. necator on Fructose + CO2				C. necator on Glycerol + CO2				C. necator on Acetate + CO2				C. necator on Formate + CO2				C. necator on CO2 + H2
RxN		Equation	Function / Enzyme	RxN		Equation	Function / Enzyme	RxN		Equation	Function / Enzyme	RxN		Equation	Function / Enzyme	RxN		Equation	Function / Enzyme
R1	ReactionFormulas = {	'--> CO2[e]'	Carbondioxide in	R1	ReactionFormulas = {	'--> CO2[e]'	Carbondioxide in	R1	ReactionFormulas = {	'--> CO2[e]'	Carbondioxide in	R1	ReactionFormulas = {	'--> CO2[e]'	Carbondioxide in	R1	ReactionFormulas = {	'--> CO2[e]'	Carbondioxide in
R2		'--> FRC[e]'	Fructose in	R2		'--> GLY[e]'	Fructose in	R2		'--> AC[e]'	Fructose in	R2		'--> FOR[e]'	Fructose in	R2		'--> H2[e]'	Hydrogen in
R3		'--> NH3[e]'	Ammonia in	R3		'--> NH3[e]'	Ammonia in	R3		'--> NH3[e]'	Ammonia in	R3		'--> NH3[e]'	Ammonia in	R3		'--> NH3[e]'	Ammonia in
R4		'--> O2[e]'	Oxygen in	R4		'--> O2[e]'	Oxygen in	R4		'--> O2[e]'	Oxygen in	R4		'--> O2[e]'	Oxygen in	R4		'--> O2[e]'	Oxygen in
R5		'CO2[e] -->'	Carbondioxide out	R5		'CO2[e] -->'	Carbondioxide out	R5		'CO2[e] -->'	Carbondioxide out	R5		'CO2[e] -->'	Carbondioxide out	R5		'CO2[e] -->'	Carbondioxide out
R6		'FOR[e] -->'	Formate out	R6		'FOR[e] -->'	Formate out	R6		'FOR[e] -->'	Formate out	R6		'FOR[e] -->'	Formate out	R6		'FOR[e] -->'	Formate out
R7		'AC[e] -->'	Acetate out	R7		'AC[e] -->'	Acetate out	R7		'AC[e] -->'	Acetate out	R7		'AC[e] -->'	Acetate out	R7		'AC[e] -->'	Acetate out
R8		'ETOH[e] -->'	Ethanol out	R8		'ETOH[e] -->'	Ethanol out	R8		'ETOH[e] -->'	Ethanol out	R8		'ETOH[e] -->'	Ethanol out	R8		'ETOH[e] -->'	Ethanol out
R9		'LAC[e] -->'	Lactate out	R9		'LAC[e] -->'	Lactate out	R9		'LAC[e] -->'	Lactate out	R9		'LAC[e] -->'	Lactate out	R9		'LAC[e] -->'	Lactate out
R10		'ACETONE[e] -->'	Acetone out	R10		'ACETONE[e] -->'	Acetone out	R10		'ACETONE[e] -->'	Acetone out	R10		'ACETONE[e] -->'	Acetone out	R10		'ACETONE[e] -->'	Acetone out
R11		'SUC[e] -->'	Succinate out	R11		'SUC[e] -->'	Succinate out	R11		'SUC[e] -->'	Succinate out	R11		'SUC[e] -->'	Succinate out	R11		'SUC[e] -->'	Succinate out
R12		'PHB[e] -->'	Polyhydroxybutyrate out	R12		'PHB[e] -->'	Polyhydroxybutyrate out	R12		'PHB[e] -->'	Polyhydroxybutyrate out	R12		'PHB[e] -->'	Polyhydroxybutyrate out	R12		'PHB[e] -->'	Polyhydroxybutyrate out
R13		'BIOMASS[e] -->'	Biomass out	R13		'BIOMASS[e] -->'	Biomass out	R13		'BIOMASS[e] -->'	Biomass out	R13		'BIOMASS[e] -->'	Biomass out	R13		'BIOMASS[e] -->'	Biomass out
R14		'PRODUCT[e] -->'	Product out	R14		'PRODUCT[e] -->'	Product out	R14		'PRODUCT[e] -->'	Product out	R14		'PRODUCT[e] -->'	Product out	R14		'PRODUCT[e] -->'	Product out
R15		'FOR[c] + H[c] + 0.3 ATP[c] --> FOR[e] + H[e] + 0.3 ADP[c] + 0.3 Pi[c]'	Formate export by ABC transporter	R15		'FOR[c] + H[c] + 0.3 ATP[c] --> FOR[e] + H[e] + 0.3 ADP[c] + 0.3 Pi[c]'	Formate export by ABC transporter	R15		'FOR[c] + H[c] + 0.3 ATP[c] --> FOR[e] + H[e] + 0.3 ADP[c] + 0.3 Pi[c]'	Formate export by ABC transporter	R15		'FOR[c] + H[c] <-- FOR[e] + H[e]'	Formate export by ABC transporter	R15		'FOR[c] + H[c] + 0.3 ATP[c] --> FOR[e] + H[e] + 0.3 ADP[c] + 0.3 Pi[c]'	Formate export by ABC transporter
R16		'AC[c] + H[c] + 0.3 ATP[c] --> AC[e] + H[e] + 0.3 ADP[c] + 0.3 Pi[c]'	Acetate export by ABC transporter	R16		'AC[c] + H[c] + 0.3 ATP[c] --> AC[e] + H[e] + 0.3 ADP[c] + 0.3 Pi[c]'	Acetate export by ABC transporter	R16		'AC[c] + H[c] <-- AC[e] + H[e]'	Acetate export by ABC transporter	R16		'AC[c] + H[c] + 0.3 ATP[c] --> AC[e] + H[e] + 0.3 ADP[c] + 0.3 Pi[c]'	Acetate export by ABC transporter	R16		'AC[c] + H[c] + 0.3 ATP[c] --> AC[e] + H[e] + 0.3 ADP[c] + 0.3 Pi[c]'	Acetate export by ABC transporter
R17		'ETOH[c] --> ETOH[e]'	Ethanol export by diffusion	R17		'ETOH[c] --> ETOH[e]'	Ethanol export by diffusion	R17		'ETOH[c] --> ETOH[e]'	Ethanol export by diffusion	R17		'ETOH[c] --> ETOH[e]'	Ethanol export by diffusion	R17		'ETOH[c] --> ETOH[e]'	Ethanol export by diffusion
R18		'LAC[c] + H[c] + 0.3 ATP[c] --> LAC[e] + H[e] + 0.3 ADP[c] + 0.3 Pi[c]'	Lactate export by ABC transporter	R18		'LAC[c] + H[c] + 0.3 ATP[c] --> LAC[e] + H[e] + 0.3 ADP[c] + 0.3 Pi[c]'	Lactate export by ABC transporter	R18		'LAC[c] + H[c] + 0.3 ATP[c] --> LAC[e] + H[e] + 0.3 ADP[c] + 0.3 Pi[c]'	Lactate export by ABC transporter	R18		'LAC[c] + H[c] + 0.3 ATP[c] --> LAC[e] + H[e] + 0.3 ADP[c] + 0.3 Pi[c]'	Lactate export by ABC transporter	R18		'LAC[c] + H[c] + 0.3 ATP[c] --> LAC[e] + H[e] + 0.3 ADP[c] + 0.3 Pi[c]'	Lactate export by ABC transporter
R19		'ACETONE[c] --> ACETONE[e]'	Acetone export by diffusion	R19		'ACETONE[c] --> ACETONE[e]'	Acetone export by diffusion	R19		'ACETONE[c] --> ACETONE[e]'	Acetone export by diffusion	R19		'ACETONE[c] --> ACETONE[e]'	Acetone export by diffusion	R19		'ACETONE[c] --> ACETONE[e]'	Acetone export by diffusion
R20		'SUC[c] + 2 H[c] + 0.6 ATP[c] --> SUC[e] + 2 H[e] + 0.6 ADP[c] + 0.6 Pi[c]'	Succinate export by ABC transporter	R20		'SUC[c] + 2 H[c] + 0.6 ATP[c] --> SUC[e] + 2 H[e] + 0.6 ADP[c] + 0.6 Pi[c]'	Succinate export by ABC transporter	R20		'SUC[c] + 2 H[c] + 0.6 ATP[c] --> SUC[e] + 2 H[e] + 0.6 ADP[c] + 0.6 Pi[c]'	Succinate export by ABC transporter	R20		'SUC[c] + 2 H[c] + 0.6 ATP[c] --> SUC[e] + 2 H[e] + 0.6 ADP[c] + 0.6 Pi[c]'	Succinate export by ABC transporter	R20		'SUC[c] + 2 H[c] + 0.6 ATP[c] --> SUC[e] + 2 H[e] + 0.6 ADP[c] + 0.6 Pi[c]'	Succinate export by ABC transporter
R21		'BIOMASS[c] --> BIOMASS[e]'	Growth	R21		'BIOMASS[c] --> BIOMASS[e]'	Growth	R21		'BIOMASS[c] --> BIOMASS[e]'	Growth	R21		'BIOMASS[c] --> BIOMASS[e]'	Growth	R21		'BIOMASS[c] --> BIOMASS[e]'	Growth
R22		'P-L[c] --> PRODUCT[e]'	Product formation	R22		'P-L[c] --> PRODUCT[e]'	Product formation	R22		'P-L[c] --> PRODUCT[e]'	Product formation	R22		'P-L[c] --> PRODUCT[e]'	Product formation	R22		'P-L[c] --> PRODUCT[e]'	Product formation
R23		'O2[e] --> O2[c]'	Oxygen import by diffusion	R23		'O2[e] --> O2[c]'	Oxygen import by diffusion	R23		'O2[e] --> O2[c]'	Oxygen import by diffusion	R23		'O2[e] --> O2[c]'	Oxygen import by diffusion	R23		'O2[e] --> O2[c]'	Oxygen import by diffusion
R24		'NH3[e] --> NH3[c]'	Ammonia import by diffusion	R24		'NH3[e] --> NH3[c]'	Ammonia import by diffusion	R24		'NH3[e] --> NH3[c]'	Ammonia import by diffusion	R24		'NH3[e] --> NH3[c]'	Ammonia import by diffusion	R24		'NH3[e] --> NH3[c]'	Ammonia import by diffusion
R25		'H2[e] --> H2[c]'	Hydrogen import by diffusion	R25		'H2[e] --> H2[c]'	Hydrogen import by diffusion	R25		'H2[e] --> H2[c]'	Hydrogen import by diffusion	R25		'H2[e] --> H2[c]'	Hydrogen import by diffusion	R25		'H2[e] --> H2[c]'	Hydrogen import by diffusion
R26		'CO2[e] <--> CO2[c]'	Carbondioxide import by diffusion	R26		'CO2[e] <--> CO2[c]'	Carbondioxide import by diffusion	R26		'CO2[e] <--> CO2[c]'	Carbondioxide import by diffusion	R26		'CO2[e] <--> CO2[c]'	Carbondioxide import by diffusion	R26		'CO2[e] <--> CO2[c]'	Carbondioxide exchange by diffusion
R27		'FRC[e] + PEP[c] --> F6P[c] + PYR[c]'	PTS [ec:2.7.1.69]	R27		'FRC[e] + PEP[c] --> F6P[c] + PYR[c]'	PTS [ec:2.7.1.69]	R27		'FRC[e] + PEP[c] --> F6P[c] + PYR[c]'	PTS [ec:2.7.1.69]	R27		'FRC[e] + PEP[c] --> F6P[c] + PYR[c]'	PTS [ec:2.7.1.69]	R27		'FRC[e] + PEP[c] --> F6P[c] + PYR[c]'	PTS [ec:2.7.1.69]
R28		'GLY[e] + ATP[c] --> ADP[c] + GLY3P[c]'	Glycerol kinase [ec:2.7.1.30]	R28		'GLY[e] + ATP[c] --> ADP[c] + GLY3P[c]'	Glycerol kinase [ec:2.7.1.30]	R28		'GLY[e] + ATP[c] --> ADP[c] + GLY3P[c]'	Glycerol kinase [ec:2.7.1.30]	R28		'GLY[e] + ATP[c] --> ADP[c] + GLY3P[c]'	Glycerol kinase [ec:2.7.1.30]	R28		'GLY[e] + ATP[c] --> ADP[c] + GLY3P[c]'	Glycerol kinase [ec:2.7.1.30]
R29		'G6P[c] + NADP[c] --> 6-PG-lac[c] + NADPH[c]'	Glucose-6-phosphate dehydrogenase [ec:1.1.1.49]	R29		'G6P[c] + NADP[c] --> 6-PG-lac[c] + NADPH[c]'	Glucose-6-phosphate dehydrogenase [ec:1.1.1.49]	R29		'G6P[c] + NADP[c] --> 6-PG-lac[c] + NADPH[c]'	Glucose-6-phosphate dehydrogenase [ec:1.1.1.49]	R29		'G6P[c] + NADP[c] --> 6-PG-lac[c] + NADPH[c]'	Glucose-6-phosphate dehydrogenase [ec:1.1.1.49]	R29		'G6P[c] + NADP[c] --> 6-PG-lac[c] + NADPH[c]'	Glucose-6-phosphate dehydrogenase [ec:1.1.1.49]
R30		'6-PG-lac[c] --> 6-PG[c]'	6-phosphogluconolactonase [ec:3.1.1.31]	R30		'6-PG-lac[c] --> 6-PG[c]'	6-phosphogluconolactonase [ec:3.1.1.31]	R30		'6-PG-lac[c] --> 6-PG[c]'	6-phosphogluconolactonase [ec:3.1.1.31]	R30		'6-PG-lac[c] --> 6-PG[c]'	6-phosphogluconolactonase [ec:3.1.1.31]	R30		'6-PG-lac[c] --> 6-PG[c]'	6-phosphogluconolactonase [ec:3.1.1.31]
R31		'6-PG[c] --> KDPG[c]'	6-phosphogluconate dehydratase [ec:4.2.1.12]	R31		'6-PG[c] --> KDPG[c]'	6-phosphogluconate dehydratase [ec:4.2.1.12]	R31		'6-PG[c] --> KDPG[c]'	6-phosphogluconate dehydratase [ec:4.2.1.12]	R31		'6-PG[c] --> KDPG[c]'	6-phosphogluconate dehydratase [ec:4.2.1.12]	R31		'6-PG[c] --> KDPG[c]'	6-phosphogluconate dehydratase [ec:4.2.1.12]
R32		'KDPG[c] --> G3P[c] + PYR[c]'	2-keto-3-deoxy-6-phosphogluconate aldolase [ec:4.1.2.14]	R32		'KDPG[c] --> G3P[c] + PYR[c]'	2-keto-3-deoxy-6-phosphogluconate aldolase [ec:4.1.2.14]	R32		'KDPG[c] --> G3P[c] + PYR[c]'	2-keto-3-deoxy-6-phosphogluconate aldolase [ec:4.1.2.14]	R32		'KDPG[c] --> G3P[c] + PYR[c]'	2-keto-3-deoxy-6-phosphogluconate aldolase [ec:4.1.2.14]	R32		'KDPG[c] --> G3P[c] + PYR[c]'	2-keto-3-deoxy-6-phosphogluconate aldolase [ec:4.1.2.14]
R33		'6-PG[c] + NADP[c] --> Ril5P[c] + NADPH[c] + CO2[c]'	6-phosphogluconate dehydrogenase [ec:1.1.1.44]	R33		'6-PG[c] + NADP[c] --> Ril5P[c] + NADPH[c] + CO2[c]'	6-phosphogluconate dehydrogenase [ec:1.1.1.44]	R33		'6-PG[c] + NADP[c] --> Ril5P[c] + NADPH[c] + CO2[c]'	6-phosphogluconate dehydrogenase [ec:1.1.1.44]	R33		'6-PG[c] + NADP[c] --> Ril5P[c] + NADPH[c] + CO2[c]'	6-phosphogluconate dehydrogenase [ec:1.1.1.44]	R33		'6-PG[c] + NADP[c] --> Ril5P[c] + NADPH[c] + CO2[c]'	6-phosphogluconate dehydrogenase [ec:1.1.1.44]
R34		'Ril5P[c] + ATP[c] --> Ril15BP[c] + ADP[c]'	Phosphoribulokinase [ec:2.7.1.19]	R34		'Ril5P[c] + ATP[c] --> Ril15BP[c] + ADP[c]'	Phosphoribulokinase [ec:2.7.1.19]	R34		'Ril5P[c] + ATP[c] --> Ril15BP[c] + ADP[c]'	Phosphoribulokinase [ec:2.7.1.19]	R34		'Ril5P[c] + ATP[c] --> Ril15BP[c] + ADP[c]'	Phosphoribulokinase [ec:2.7.1.19]	R34		'Ril5P[c] + ATP[c] --> Ril15BP[c] + ADP[c]'	Phosphoribulokinase [ec:2.7.1.19]
R35		'5 Ril15BP[c] + 4 CO2[c] + 1 O2[c] --> 9 3-PG[c] + 1 PG[c]'	Ribulose-1,5-bisphosphate carboxylase/oxygenase (RuBisCO) "best case" [ec:4.1.1.39]	R35		'5 Ril15BP[c] + 4 CO2[c] + 1 O2[c] --> 9 3-PG[c] + 1 PG[c]'	Ribulose-1,5-bisphosphate carboxylase/oxygenase (RuBisCO) "best case" [ec:4.1.1.39]	R35		'5 Ril15BP[c] + 4 CO2[c] + 1 O2[c] --> 9 3-PG[c] + 1 PG[c]'	Ribulose-1,5-bisphosphate carboxylase/oxygenase (RuBisCO) "best case" [ec:4.1.1.39]	R35		'5 Ril15BP[c] + 4 CO2[c] + 1 O2[c] --> 9 3-PG[c] + 1 PG[c]'	Ribulose-1,5-bisphosphate carboxylase/oxygenase (RuBisCO) "best case" [ec:4.1.1.39]	R35		'5 Ril15BP[c] + 4 CO2[c] + 1 O2[c] --> 9 3-PG[c] + 1 PG[c]'	Ribulose-1,5-bisphosphate carboxylase/oxygenase (RuBisCO) "best case" [ec:4.1.1.39]
R36		'4 Ril15BP[c] + 3 CO2[c] + 1 O2[c] --> 7 3-PG[c] + 1 PG[c]'	Ribulose-1,5-bisphosphate carboxylase/oxygenase (RuBisCO) "worst case" [ec:4.1.1.39]	R36		'4 Ril15BP[c] + 3 CO2[c] + 1 O2[c] --> 7 3-PG[c] + 1 PG[c]'	Ribulose-1,5-bisphosphate carboxylase/oxygenase (RuBisCO) "worst case" [ec:4.1.1.39]	R36		'4 Ril15BP[c] + 3 CO2[c] + 1 O2[c] --> 7 3-PG[c] + 1 PG[c]'	Ribulose-1,5-bisphosphate carboxylase/oxygenase (RuBisCO) "worst case" [ec:4.1.1.39]	R36		'4 Ril15BP[c] + 3 CO2[c] + 1 O2[c] --> 7 3-PG[c] + 1 PG[c]'	Ribulose-1,5-bisphosphate carboxylase/oxygenase (RuBisCO) "worst case" [ec:4.1.1.39]	R36		'4 Ril15BP[c] + 3 CO2[c] + 1 O2[c] --> 7 3-PG[c] + 1 PG[c]'	Ribulose-1,5-bisphosphate carboxylase/oxygenase (RuBisCO) "worst case" [ec:4.1.1.39]
R37		'PG[c] --> GA[c] + Pi[c]'	2-phosphoglycolate phosphohydrolase [ec:3.1.3.18]	R37		'PG[c] --> GA[c] + Pi[c]'	2-phosphoglycolate phosphohydrolase [ec:3.1.3.18]	R37		'PG[c] --> GA[c] + Pi[c]'	2-phosphoglycolate phosphohydrolase [ec:3.1.3.18]	R37		'PG[c] --> GA[c] + Pi[c]'	2-phosphoglycolate phosphohydrolase [ec:3.1.3.18]	R37		'PG[c] --> GA[c] + Pi[c]'	2-phosphoglycolate phosphohydrolase [ec:3.1.3.18]
R38		'2 GA[c] + O2[c] --> 2 GLYOX[c]'	Glycolate dehydrogenase [ec:1.1.99.14]	R38		'2 GA[c] + O2[c] --> 2 GLYOX[c]'	Glycolate dehydrogenase [ec:1.1.99.14]	R38		'2 GA[c] + O2[c] --> 2 GLYOX[c]'	Glycolate dehydrogenase [ec:1.1.99.14]	R38		'2 GA[c] + O2[c] --> 2 GLYOX[c]'	Glycolate dehydrogenase [ec:1.1.99.14]	R38		'2 GA[c] + O2[c] --> 2 GLYOX[c]'	Glycolate dehydrogenase [ec:1.1.99.14]
R39		'2 GLYOX[c] --> TS[c] + CO2[c]'	Tartronate-semialdehyde synthase [ec:4.1.1.47]	R39		'2 GLYOX[c] --> TS[c] + CO2[c]'	Tartronate-semialdehyde synthase [ec:4.1.1.47]	R39		'2 GLYOX[c] --> TS[c] + CO2[c]'	Tartronate-semialdehyde synthase [ec:4.1.1.47]	R39		'2 GLYOX[c] --> TS[c] + CO2[c]'	Tartronate-semialdehyde synthase [ec:4.1.1.47]	R39		'2 GLYOX[c] --> TS[c] + CO2[c]'	Tartronate-semialdehyde synthase [ec:4.1.1.47]
R40		'TS[c] + NADH[c] --> Glycerate[c] + NAD[c]'	2-hydroxy-3-oxopropionate reductase [ec:1.1.1.60]	R40		'TS[c] + NADH[c] --> Glycerate[c] + NAD[c]'	2-hydroxy-3-oxopropionate reductase [ec:1.1.1.60]	R40		'TS[c] + NADH[c] --> Glycerate[c] + NAD[c]'	2-hydroxy-3-oxopropionate reductase [ec:1.1.1.60]	R40		'TS[c] + NADH[c] --> Glycerate[c] + NAD[c]'	2-hydroxy-3-oxopropionate reductase [ec:1.1.1.60]	R40		'TS[c] + NADH[c] --> Glycerate[c] + NAD[c]'	2-hydroxy-3-oxopropionate reductase [ec:1.1.1.60]
R41		'Glycerate[c] + ATP[c] --> 2-PG[c] + ADP[c]'	Glycerate 2-kinase [ec:2.7.1.165]	R41		'Glycerate[c] + ATP[c] --> 2-PG[c] + ADP[c]'	Glycerate 2-kinase [ec:2.7.1.165]	R41		'Glycerate[c] + ATP[c] --> 2-PG[c] + ADP[c]'	Glycerate 2-kinase [ec:2.7.1.165]	R41		'Glycerate[c] + ATP[c] --> 2-PG[c] + ADP[c]'	Glycerate 2-kinase [ec:2.7.1.165]	R41		'Glycerate[c] + ATP[c] --> 2-PG[c] + ADP[c]'	Glycerate 2-kinase [ec:2.7.1.165]
R42		'Ril5P[c] <--> R5P[c]'	Ribose-5-phosphate isomerase [ec:5.3.1.6]	R42		'Ril5P[c] <--> R5P[c]'	Ribose-5-phosphate isomerase [ec:5.3.1.6]	R42		'Ril5P[c] <--> R5P[c]'	Ribose-5-phosphate isomerase [ec:5.3.1.6]	R42		'Ril5P[c] <--> R5P[c]'	Ribose-5-phosphate isomerase [ec:5.3.1.6]	R42		'Ril5P[c] <--> R5P[c]'	Ribose-5-phosphate isomerase [ec:5.3.1.6]
R43		'Ril5P[c] <--> X5P[c]'	Ribulose-phosphate 3-epimerase [ec:5.1.3.1]	R43		'Ril5P[c] <--> X5P[c]'	Ribulose-phosphate 3-epimerase [ec:5.1.3.1]	R43		'Ril5P[c] <--> X5P[c]'	Ribulose-phosphate 3-epimerase [ec:5.1.3.1]	R43		'Ril5P[c] <--> X5P[c]'	Ribulose-phosphate 3-epimerase [ec:5.1.3.1]	R43		'Ril5P[c] <--> X5P[c]'	Ribulose-phosphate 3-epimerase [ec:5.1.3.1]
R44		'R5P[c] + X5P[c] <--> G3P[c] + S7P[c]'	Transketolase [ec:2.2.1.1]	R44		'R5P[c] + X5P[c] <--> G3P[c] + S7P[c]'	Transketolase [ec:2.2.1.1]	R44		'R5P[c] + X5P[c] <--> G3P[c] + S7P[c]'	Transketolase [ec:2.2.1.1]	R44		'R5P[c] + X5P[c] <--> G3P[c] + S7P[c]'	Transketolase [ec:2.2.1.1]	R44		'R5P[c] + X5P[c] <--> G3P[c] + S7P[c]'	Transketolase [ec:2.2.1.1]
R45		'G3P[c] + S7P[c] <--> E4P[c] + F6P[c]'	Transaldolase [ec:2.2.1.2]	R45		'G3P[c] + S7P[c] <--> E4P[c] + F6P[c]'	Transaldolase [ec:2.2.1.2]	R45		'G3P[c] + S7P[c] <--> E4P[c] + F6P[c]'	Transaldolase [ec:2.2.1.2]	R45		'G3P[c] + S7P[c] <--> E4P[c] + F6P[c]'	Transaldolase [ec:2.2.1.2]	R45		'G3P[c] + S7P[c] <--> E4P[c] + F6P[c]'	Transaldolase [ec:2.2.1.2]
R46		'X5P[c] + E4P[c] <--> F6P[c] + G3P[c]'	Transketolase [ec:2.2.1.1]	R46		'X5P[c] + E4P[c] <--> F6P[c] + G3P[c]'	Transketolase [ec:2.2.1.1]	R46		'X5P[c] + E4P[c] <--> F6P[c] + G3P[c]'	Transketolase [ec:2.2.1.1]	R46		'X5P[c] + E4P[c] <--> F6P[c] + G3P[c]'	Transketolase [ec:2.2.1.1]	R46		'X5P[c] + E4P[c] <--> F6P[c] + G3P[c]'	Transketolase [ec:2.2.1.1]
R47		'G6P[c] <--> F6P[c]'	Glucose-6-phosphate isomerase [ec:5.3.1.9]	R47		'G6P[c] <--> F6P[c]'	Glucose-6-phosphate isomerase [ec:5.3.1.9]	R47		'G6P[c] <--> F6P[c]'	Glucose-6-phosphate isomerase [ec:5.3.1.9]	R47		'G6P[c] <--> F6P[c]'	Glucose-6-phosphate isomerase [ec:5.3.1.9]	R47		'G6P[c] <--> F6P[c]'	Glucose-6-phosphate isomerase [ec:5.3.1.9]
R48		'F16BP[c] --> F6P[c] + Pi[c]'	Fructose-bisphosphatase [ec:3.1.3.11]	R48		'F16BP[c] --> F6P[c] + Pi[c]'	Fructose-bisphosphatase [ec:3.1.3.11]	R48		'F16BP[c] --> F6P[c] + Pi[c]'	Fructose-bisphosphatase [ec:3.1.3.11]	R48		'F16BP[c] --> F6P[c] + Pi[c]'	Fructose-bisphosphatase [ec:3.1.3.11]	R48		'F16BP[c] --> F6P[c] + Pi[c]'	Fructose-bisphosphatase [ec:3.1.3.11]
R49		'F16BP[c] <--> G3P[c] + DHAP[c]'	Fructose-bisphosphate aldolase [ec:4.1.2.13]	R49		'F16BP[c] <--> G3P[c] + DHAP[c]'	Fructose-bisphosphate aldolase [ec:4.1.2.13]	R49		'F16BP[c] <--> G3P[c] + DHAP[c]'	Fructose-bisphosphate aldolase [ec:4.1.2.13]	R49		'F16BP[c] <--> G3P[c] + DHAP[c]'	Fructose-bisphosphate aldolase [ec:4.1.2.13]	R49		'F16BP[c] <--> G3P[c] + DHAP[c]'	Fructose-bisphosphate aldolase [ec:4.1.2.13]
R50		'GLY3P[c] + NAD[c] --> DHAP[c] + NADH[c]'	Glycerol-3-phosphate dehydrogenase [ec:1.1.1.8]	R50		'GLY3P[c] + NAD[c] --> DHAP[c] + NADH[c]'	Glycerol-3-phosphate dehydrogenase [ec:1.1.1.8]	R50		'GLY3P[c] + NAD[c] --> DHAP[c] + NADH[c]'	Glycerol-3-phosphate dehydrogenase [ec:1.1.1.8]	R50		'GLY3P[c] + NAD[c] --> DHAP[c] + NADH[c]'	Glycerol-3-phosphate dehydrogenase [ec:1.1.1.8]	R50		'GLY3P[c] + NAD[c] --> DHAP[c] + NADH[c]'	Glycerol-3-phosphate dehydrogenase [ec:1.1.1.8]
R51		'DHAP[c] <--> G3P[c]'	Triose-phosphate isomerase [ec:5.3.1.1]	R51		'DHAP[c] <--> G3P[c]'	Triose-phosphate isomerase [ec:5.3.1.1]	R51		'DHAP[c] <--> G3P[c]'	Triose-phosphate isomerase [ec:5.3.1.1]	R51		'DHAP[c] <--> G3P[c]'	Triose-phosphate isomerase [ec:5.3.1.1]	R51		'DHAP[c] <--> G3P[c]'	Triose-phosphate isomerase [ec:5.3.1.1]
R52		'G3P[c] + NAD[c] + Pi[c] <--> BPG[c] + NADH[c]'	Glyceraldehyde 3-phosphate dehydrogenase [ec:1.2.1.12]	R52		'G3P[c] + NAD[c] + Pi[c] <--> BPG[c] + NADH[c]'	Glyceraldehyde 3-phosphate dehydrogenase [ec:1.2.1.12]	R52		'G3P[c] + NAD[c] + Pi[c] <--> BPG[c] + NADH[c]'	Glyceraldehyde 3-phosphate dehydrogenase [ec:1.2.1.12]	R52		'G3P[c] + NAD[c] + Pi[c] <--> BPG[c] + NADH[c]'	Glyceraldehyde 3-phosphate dehydrogenase [ec:1.2.1.12]	R52		'G3P[c] + NAD[c] + Pi[c] <--> BPG[c] + NADH[c]'	Glyceraldehyde 3-phosphate dehydrogenase [ec:1.2.1.12]
R53		'BPG[c] + ADP[c] <--> 3-PG[c] + ATP[c]'	Phosphoglycerate kinase [ec:2.7.2.3]	R53		'BPG[c] + ADP[c] <--> 3-PG[c] + ATP[c]'	Phosphoglycerate kinase [ec:2.7.2.3]	R53		'BPG[c] + ADP[c] <--> 3-PG[c] + ATP[c]'	Phosphoglycerate kinase [ec:2.7.2.3]	R53		'BPG[c] + ADP[c] <--> 3-PG[c] + ATP[c]'	Phosphoglycerate kinase [ec:2.7.2.3]	R53		'BPG[c] + ADP[c] <--> 3-PG[c] + ATP[c]'	Phosphoglycerate kinase [ec:2.7.2.3]
R54		'3-PG[c] <--> 2-PG[c]'	Phosphoglycerate mutase [ec:5.4.2.1]	R54		'3-PG[c] <--> 2-PG[c]'	Phosphoglycerate mutase [ec:5.4.2.1]	R54		'3-PG[c] <--> 2-PG[c]'	Phosphoglycerate mutase [ec:5.4.2.1]	R54		'3-PG[c] <--> 2-PG[c]'	Phosphoglycerate mutase [ec:5.4.2.1]	R54		'3-PG[c] <--> 2-PG[c]'	Phosphoglycerate mutase [ec:5.4.2.1]
R55		'2-PG[c] <--> PEP[c]'	Phosphopyruvate hydratase [ec:4.2.1.11]	R55		'2-PG[c] <--> PEP[c]'	Phosphopyruvate hydratase [ec:4.2.1.11]	R55		'2-PG[c] <--> PEP[c]'	Phosphopyruvate hydratase [ec:4.2.1.11]	R55		'2-PG[c] <--> PEP[c]'	Phosphopyruvate hydratase [ec:4.2.1.11]	R55		'2-PG[c] <--> PEP[c]'	Phosphopyruvate hydratase [ec:4.2.1.11]
R56		'PEP[c] + ADP[c] --> PYR[c] + ATP[c]'	Pyruvate kinase [ec:2.7.1.40]	R56		'PEP[c] + ADP[c] --> PYR[c] + ATP[c]'	Pyruvate kinase [ec:2.7.1.40]	R56		'PEP[c] + ADP[c] --> PYR[c] + ATP[c]'	Pyruvate kinase [ec:2.7.1.40]	R56		'PEP[c] + ADP[c] --> PYR[c] + ATP[c]'	Pyruvate kinase [ec:2.7.1.40]	R56		'PEP[c] + ADP[c] --> PYR[c] + ATP[c]'	Pyruvate kinase [ec:2.7.1.40]
R57		'PYR[c] + ATP[c] --> PEP[c] + AMP[c] + Pi[c]'	Phosphoenolpyruvate synthase [ec:2.7.9.2]	R57		'PYR[c] + ATP[c] --> PEP[c] + AMP[c] + Pi[c]'	Phosphoenolpyruvate synthase [ec:2.7.9.2]	R57		'PYR[c] + ATP[c] --> PEP[c] + AMP[c] + Pi[c]'	Phosphoenolpyruvate synthase [ec:2.7.9.2]	R57		'PYR[c] + ATP[c] --> PEP[c] + AMP[c] + Pi[c]'	Phosphoenolpyruvate synthase [ec:2.7.9.2]	R57		'PYR[c] + ATP[c] --> PEP[c] + AMP[c] + Pi[c]'	Phosphoenolpyruvate synthase [ec:2.7.9.2]
R58		'PYR[c] + NAD[c] + H-CoA[c] --> AC-CoA[c] + NADH[c] + CO2[c]'	Pyruvate dehydrogenase complex [ec:1.2.4.1&ec:2.3.1.12&ec:1.8.1.4]	R58		'PYR[c] + NAD[c] + H-CoA[c] --> AC-CoA[c] + NADH[c] + CO2[c]'	Pyruvate dehydrogenase complex [ec:1.2.4.1&ec:2.3.1.12&ec:1.8.1.4]	R58		'PYR[c] + NAD[c] + H-CoA[c] --> AC-CoA[c] + NADH[c] + CO2[c]'	Pyruvate dehydrogenase complex [ec:1.2.4.1&ec:2.3.1.12&ec:1.8.1.4]	R58		'PYR[c] + NAD[c] + H-CoA[c] --> AC-CoA[c] + NADH[c] + CO2[c]'	Pyruvate dehydrogenase complex [ec:1.2.4.1&ec:2.3.1.12&ec:1.8.1.4]	R58		'PYR[c] + NAD[c] + H-CoA[c] --> AC-CoA[c] + NADH[c] + CO2[c]'	Pyruvate dehydrogenase complex [ec:1.2.4.1&ec:2.3.1.12&ec:1.8.1.4]
R59		'PEP[c] + CO2[c] --> OXA[c] + Pi[c]'	Phosphoenolpyruvate carboxylase [ec:4.1.1.31]	R59		'PEP[c] + CO2[c] --> OXA[c] + Pi[c]'	Phosphoenolpyruvate carboxylase [ec:4.1.1.31]	R59		'PEP[c] + CO2[c] --> OXA[c] + Pi[c]'	Phosphoenolpyruvate carboxylase [ec:4.1.1.31]	R59		'PEP[c] + CO2[c] --> OXA[c] + Pi[c]'	Phosphoenolpyruvate carboxylase [ec:4.1.1.31]	R59		'PEP[c] + CO2[c] --> OXA[c] + Pi[c]'	Phosphoenolpyruvate carboxylase [ec:4.1.1.31]
R60		'PYR[c] + ATP[c] + CO2[c] <--> OXA[c] + ADP[c] + Pi[c]'	Pyruvate carboxylase [ec:6.4.1.1]	R60		'PYR[c] + ATP[c] + CO2[c] <--> OXA[c] + ADP[c] + Pi[c]'	Pyruvate carboxylase [ec:6.4.1.1]	R60		'PYR[c] + ATP[c] + CO2[c] <--> OXA[c] + ADP[c] + Pi[c]'	Pyruvate carboxylase [ec:6.4.1.1]	R60		'PYR[c] + ATP[c] + CO2[c] <--> OXA[c] + ADP[c] + Pi[c]'	Pyruvate carboxylase [ec:6.4.1.1]	R60		'PYR[c] + ATP[c] + CO2[c] <--> OXA[c] + ADP[c] + Pi[c]'	Pyruvate carboxylase [ec:6.4.1.1]
R61		'OXA[c] + ATP[c] --> PEP[c] + ADP[c] + CO2[c]'	Phosphoenolpyruvate carboxykinase [ec:4.1.1.49]	R61		'OXA[c] + ATP[c] --> PEP[c] + ADP[c] + CO2[c]'	Phosphoenolpyruvate carboxykinase [ec:4.1.1.49]	R61		'OXA[c] + ATP[c] --> PEP[c] + ADP[c] + CO2[c]'	Phosphoenolpyruvate carboxykinase [ec:4.1.1.49]	R61		'OXA[c] + ATP[c] --> PEP[c] + ADP[c] + CO2[c]'	Phosphoenolpyruvate carboxykinase [ec:4.1.1.49]	R61		'OXA[c] + ATP[c] --> PEP[c] + ADP[c] + CO2[c]'	Phosphoenolpyruvate carboxykinase [ec:4.1.1.49]
R62		'OXA[c] + AC-CoA[c] --> CIT[c] + H-CoA[c]'	Citrate synthase [ec:2.3.3.1]	R62		'OXA[c] + AC-CoA[c] --> CIT[c] + H-CoA[c]'	Citrate synthase [ec:2.3.3.1]	R62		'OXA[c] + AC-CoA[c] --> CIT[c] + H-CoA[c]'	Citrate synthase [ec:2.3.3.1]	R62		'OXA[c] + AC-CoA[c] --> CIT[c] + H-CoA[c]'	Citrate synthase [ec:2.3.3.1]	R62		'OXA[c] + AC-CoA[c] --> CIT[c] + H-CoA[c]'	Citrate synthase [ec:2.3.3.1]
R63		'CIT[c] <--> ISC[c]'	Aconitase [ec:4.2.1.3]	R63		'CIT[c] <--> ISC[c]'	Aconitase [ec:4.2.1.3]	R63		'CIT[c] <--> ISC[c]'	Aconitase [ec:4.2.1.3]	R63		'CIT[c] <--> ISC[c]'	Aconitase [ec:4.2.1.3]	R63		'CIT[c] <--> ISC[c]'	Aconitase [ec:4.2.1.3]
R64		'ISC[c] + NAD[c] --> aKG[c] + NADH[c] + CO2[c]'	Isocitrate dehydrogenase (NAD dependent) [ec:1.1.1.41]	R64		'ISC[c] + NAD[c] --> aKG[c] + NADH[c] + CO2[c]'	Isocitrate dehydrogenase (NAD dependent) [ec:1.1.1.41]	R64		'ISC[c] + NAD[c] --> aKG[c] + NADH[c] + CO2[c]'	Isocitrate dehydrogenase (NAD dependent) [ec:1.1.1.41]	R64		'ISC[c] + NAD[c] --> aKG[c] + NADH[c] + CO2[c]'	Isocitrate dehydrogenase (NAD dependent) [ec:1.1.1.41]	R64		'ISC[c] + NAD[c] --> aKG[c] + NADH[c] + CO2[c]'	Isocitrate dehydrogenase (NAD dependent) [ec:1.1.1.41]
R65		'aKG[c] + H-CoA[c] + NAD[c] --> SUC-CoA[c] + CO2[c] + NADH[c]'	α-ketoglutarate dehydrogenase [ec:1.2.4.2&2.3.1.61]	R65		'aKG[c] + H-CoA[c] + NAD[c] --> SUC-CoA[c] + CO2[c] + NADH[c]'	α-ketoglutarate dehydrogenase [ec:1.2.4.2&2.3.1.61]	R65		'aKG[c] + H-CoA[c] + NAD[c] --> SUC-CoA[c] + CO2[c] + NADH[c]'	α-ketoglutarate dehydrogenase [ec:1.2.4.2&2.3.1.61]	R65		'aKG[c] + H-CoA[c] + NAD[c] --> SUC-CoA[c] + CO2[c] + NADH[c]'	α-ketoglutarate dehydrogenase [ec:1.2.4.2&2.3.1.61]	R65		'aKG[c] + H-CoA[c] + NAD[c] --> SUC-CoA[c] + CO2[c] + NADH[c]'	α-ketoglutarate dehydrogenase [ec:1.2.4.2&2.3.1.61]
R66		'SUC-CoA[c] + ADP[c] + Pi[c] <--> SUC[c] + H-CoA[c] + ATP[c]'	Succinyl-CoA synthetase [ec:6.2.1.5]	R66		'SUC-CoA[c] + ADP[c] + Pi[c] <--> SUC[c] + H-CoA[c] + ATP[c]'	Succinyl-CoA synthetase [ec:6.2.1.5]	R66		'SUC-CoA[c] + ADP[c] + Pi[c] <--> SUC[c] + H-CoA[c] + ATP[c]'	Succinyl-CoA synthetase [ec:6.2.1.5]	R66		'SUC-CoA[c] + ADP[c] + Pi[c] <--> SUC[c] + H-CoA[c] + ATP[c]'	Succinyl-CoA synthetase [ec:6.2.1.5]	R66		'SUC-CoA[c] + ADP[c] + Pi[c] <--> SUC[c] + H-CoA[c] + ATP[c]'	Succinyl-CoA synthetase [ec:6.2.1.5]
R67		'SUC[c] + FAD[c] <--> FUM[c] + FADH2[c]'	Fumarate reductase [ec:1.3.5.4]	R67		'SUC[c] + FAD[c] <--> FUM[c] + FADH2[c]'	Fumarate reductase [ec:1.3.5.4]	R67		'SUC[c] + FAD[c] <--> FUM[c] + FADH2[c]'	Fumarate reductase [ec:1.3.5.4]	R67		'SUC[c] + FAD[c] <--> FUM[c] + FADH2[c]'	Fumarate reductase [ec:1.3.5.4]	R67		'SUC[c] + FAD[c] <--> FUM[c] + FADH2[c]'	Fumarate reductase [ec:1.3.5.4]
R68		'SUC[c] + UQ[c] --> FUM[c] + UQH2[c]'	Succinate dehydrogenase [ec:1.3.5.1]	R68		'SUC[c] + UQ[c] --> FUM[c] + UQH2[c]'	Succinate dehydrogenase [ec:1.3.5.1]	R68		'SUC[c] + UQ[c] --> FUM[c] + UQH2[c]'	Succinate dehydrogenase [ec:1.3.5.1]	R68		'SUC[c] + UQ[c] --> FUM[c] + UQH2[c]'	Succinate dehydrogenase [ec:1.3.5.1]	R68		'SUC[c] + UQ[c] --> FUM[c] + UQH2[c]'	Succinate dehydrogenase [ec:1.3.5.1]
R69		'FUM[c] <--> MAL[c]'	Fumarase [ec:4.2.1.2]	R69		'FUM[c] <--> MAL[c]'	Fumarase [ec:4.2.1.2]	R69		'FUM[c] <--> MAL[c]'	Fumarase [ec:4.2.1.2]	R69		'FUM[c] <--> MAL[c]'	Fumarase [ec:4.2.1.2]	R69		'FUM[c] <--> MAL[c]'	Fumarase [ec:4.2.1.2]
R70		'MAL[c] + NAD[c] <--> OXA[c] + NADH[c]'	Malate dehydrogenase [ec:1.1.1.37]	R70		'MAL[c] + NAD[c] <--> OXA[c] + NADH[c]'	Malate dehydrogenase [ec:1.1.1.37]	R70		'MAL[c] + NAD[c] <--> OXA[c] + NADH[c]'	Malate dehydrogenase [ec:1.1.1.37]	R70		'MAL[c] + NAD[c] <--> OXA[c] + NADH[c]'	Malate dehydrogenase [ec:1.1.1.37]	R70		'MAL[c] + NAD[c] <--> OXA[c] + NADH[c]'	Malate dehydrogenase [ec:1.1.1.37]
R71		'MAL[c] + NADP[c] --> PYR[c] + CO2[c] + NADPH[c]'	Malic enzyme (NADP dependent) [ec:1.1.1.40]	R71		'MAL[c] + NADP[c] --> PYR[c] + CO2[c] + NADPH[c]'	Malic enzyme (NADP dependent) [ec:1.1.1.40]	R71		'MAL[c] + NADP[c] --> PYR[c] + CO2[c] + NADPH[c]'	Malic enzyme (NADP dependent) [ec:1.1.1.40]	R71		'MAL[c] + NADP[c] --> PYR[c] + CO2[c] + NADPH[c]'	Malic enzyme (NADP dependent) [ec:1.1.1.40]	R71		'MAL[c] + NADP[c] --> PYR[c] + CO2[c] + NADPH[c]'	Malic enzyme (NADP dependent) [ec:1.1.1.40]
R72		'ISC[c] --> GLYOX[c] + SUC[c]'	Isocitrate lyase [ec:4.1.3.1]	R72		'ISC[c] --> GLYOX[c] + SUC[c]'	Isocitrate lyase [ec:4.1.3.1]	R72		'ISC[c] --> GLYOX[c] + SUC[c]'	Isocitrate lyase [ec:4.1.3.1]	R72		'ISC[c] --> GLYOX[c] + SUC[c]'	Isocitrate lyase [ec:4.1.3.1]	R72		'ISC[c] --> GLYOX[c] + SUC[c]'	Isocitrate lyase [ec:4.1.3.1]
R73		'GLYOX[c] + AC-CoA[c] --> MAL[c] + H-CoA[c]'	Malate synthase [ec:2.3.3.9]	R73		'GLYOX[c] + AC-CoA[c] --> MAL[c] + H-CoA[c]'	Malate synthase [ec:2.3.3.9]	R73		'GLYOX[c] + AC-CoA[c] --> MAL[c] + H-CoA[c]'	Malate synthase [ec:2.3.3.9]	R73		'GLYOX[c] + AC-CoA[c] --> MAL[c] + H-CoA[c]'	Malate synthase [ec:2.3.3.9]	R73		'GLYOX[c] + AC-CoA[c] --> MAL[c] + H-CoA[c]'	Malate synthase [ec:2.3.3.9]
R74		'AC[c] + H-CoA[c] + ATP[c] --> AC-CoA[c] + AMP[c] + 2 Pi[c]'	Acetyl-CoA synthetase [ec:6.2.1.1]	R74		'AC[c] + H-CoA[c] + ATP[c] --> AC-CoA[c] + AMP[c] + 2 Pi[c]'	Acetyl-CoA synthetase [ec:6.2.1.1]	R74		'AC[c] + H-CoA[c] + ATP[c] --> AC-CoA[c] + AMP[c] + 2 Pi[c]'	Acetyl-CoA synthetase [ec:6.2.1.1]	R74		'AC[c] + H-CoA[c] + ATP[c] --> AC-CoA[c] + AMP[c] + 2 Pi[c]'	Acetyl-CoA synthetase [ec:6.2.1.1]	R74		'AC[c] + H-CoA[c] + ATP[c] --> AC-CoA[c] + AMP[c] + 2 Pi[c]'	Acetyl-CoA synthetase [ec:6.2.1.1]
R75		'2 AC-CoA[c] <--> ACAC-CoA[c] + H-CoA[c]'	Acetoacetyl-CoA thiolase [ec:2.3.1.9]	R75		'2 AC-CoA[c] <--> ACAC-CoA[c] + H-CoA[c]'	Acetoacetyl-CoA thiolase [ec:2.3.1.9]	R75		'2 AC-CoA[c] <--> ACAC-CoA[c] + H-CoA[c]'	Acetoacetyl-CoA thiolase [ec:2.3.1.9]	R75		'2 AC-CoA[c] <--> ACAC-CoA[c] + H-CoA[c]'	Acetoacetyl-CoA thiolase [ec:2.3.1.9]	R75		'2 AC-CoA[c] <--> ACAC-CoA[c] + H-CoA[c]'	Acetoacetyl-CoA thiolase [ec:2.3.1.9]
R76		'AC-CoA[c] + SUC[c] --> AC[c] + SUC-CoA[c]'	Succinyl-CoA:acetate CoA-transferase [ec:2.8.3.18]	R76		'AC-CoA[c] + SUC[c] --> AC[c] + SUC-CoA[c]'	Succinyl-CoA:acetate CoA-transferase [ec:2.8.3.18]	R76		'AC-CoA[c] + SUC[c] --> AC[c] + SUC-CoA[c]'	Succinyl-CoA:acetate CoA-transferase [ec:2.8.3.18]	R76		'AC-CoA[c] + SUC[c] --> AC[c] + SUC-CoA[c]'	Succinyl-CoA:acetate CoA-transferase [ec:2.8.3.18]	R76		'AC-CoA[c] + SUC[c] --> AC[c] + SUC-CoA[c]'	Succinyl-CoA:acetate CoA-transferase [ec:2.8.3.18]
R77		'ACAC[c] + SUC-CoA[c] <--> ACAC-CoA[c] + SUC[c]'	3-Oxoacid CoA-transferase [ec:2.8.3.5]	R77		'ACAC[c] + SUC-CoA[c] <--> ACAC-CoA[c] + SUC[c]'	3-Oxoacid CoA-transferase [ec:2.8.3.5]	R77		'ACAC[c] + SUC-CoA[c] <--> ACAC-CoA[c] + SUC[c]'	3-Oxoacid CoA-transferase [ec:2.8.3.5]	R77		'ACAC[c] + SUC-CoA[c] <--> ACAC-CoA[c] + SUC[c]'	3-Oxoacid CoA-transferase [ec:2.8.3.5]	R77		'ACAC[c] + SUC-CoA[c] <--> ACAC-CoA[c] + SUC[c]'	3-Oxoacid CoA-transferase [ec:2.8.3.5]
R78		'PYR[c] + H-CoA[c] --> AC-CoA[c] + FOR[c]'	Pyruvate formate lyase [ec:2.3.1.54]	R78		'PYR[c] + H-CoA[c] --> AC-CoA[c] + FOR[c]'	Pyruvate formate lyase [ec:2.3.1.54]	R78		'PYR[c] + H-CoA[c] --> AC-CoA[c] + FOR[c]'	Pyruvate formate lyase [ec:2.3.1.54]	R78		'PYR[c] + H-CoA[c] --> AC-CoA[c] + FOR[c]'	Pyruvate formate lyase [ec:2.3.1.54]	R78		'PYR[c] + H-CoA[c] --> AC-CoA[c] + FOR[c]'	Pyruvate formate lyase [ec:2.3.1.54]
R79		'FOR[c] + NAD[c] --> CO2[c] + NADH[c]'	Formate dehydrogenase [ec:1.17.1.9]	R79		'FOR[c] + NAD[c] --> CO2[c] + NADH[c]'	Formate dehydrogenase [ec:1.17.1.9]	R79		'FOR[c] + NAD[c] --> CO2[c] + NADH[c]'	Formate dehydrogenase [ec:1.17.1.9]	R79		'FOR[c] + NAD[c] --> CO2[c] + NADH[c]'	Formate dehydrogenase [ec:1.17.1.9]	R79		'FOR[c] + NAD[c] --> CO2[c] + NADH[c]'	Formate dehydrogenase [ec:1.17.1.9]
R80		'H-CoA[c] + ACP[c] --> AC-CoA[c] + Pi[c]'	Phosphate acetyltransferase [ec:2.3.1.8]	R80		'H-CoA[c] + ACP[c] --> AC-CoA[c] + Pi[c]'	Phosphate acetyltransferase [ec:2.3.1.8]	R80		'H-CoA[c] + ACP[c] --> AC-CoA[c] + Pi[c]'	Phosphate acetyltransferase [ec:2.3.1.8]	R80		'H-CoA[c] + ACP[c] --> AC-CoA[c] + Pi[c]'	Phosphate acetyltransferase [ec:2.3.1.8]	R80		'H-CoA[c] + ACP[c] --> AC-CoA[c] + Pi[c]'	Phosphate acetyltransferase [ec:2.3.1.8]
R81		'ACP[c] + ADP[c] --> AC[c] + ATP[c]'	Acetate kinase [ec:2.7.2.1]	R81		'ACP[c] + ADP[c] --> AC[c] + ATP[c]'	Acetate kinase [ec:2.7.2.1]	R81		'ACP[c] + ADP[c] --> AC[c] + ATP[c]'	Acetate kinase [ec:2.7.2.1]	R81		'ACP[c] + ADP[c] --> AC[c] + ATP[c]'	Acetate kinase [ec:2.7.2.1]	R81		'ACP[c] + ADP[c] --> AC[c] + ATP[c]'	Acetate kinase [ec:2.7.2.1]
R82		'AC-CoA[c] + NADH[c] <--> ACA[c] + NAD[c] + H-CoA[c]'	Acetaldehyde dehydrogenase [ec:1.2.1.10]	R82		'AC-CoA[c] + NADH[c] <--> ACA[c] + NAD[c] + H-CoA[c]'	Acetaldehyde dehydrogenase [ec:1.2.1.10]	R82		'AC-CoA[c] + NADH[c] <--> ACA[c] + NAD[c] + H-CoA[c]'	Acetaldehyde dehydrogenase [ec:1.2.1.10]	R82		'AC-CoA[c] + NADH[c] <--> ACA[c] + NAD[c] + H-CoA[c]'	Acetaldehyde dehydrogenase [ec:1.2.1.10]	R82		'AC-CoA[c] + NADH[c] <--> ACA[c] + NAD[c] + H-CoA[c]'	Acetaldehyde dehydrogenase [ec:1.2.1.10]
R83		'ACA[c] + NAD[c] --> AC[c] + NADH[c]'	Aldehyde dehydrogenase (NAD dependent) [ec:1.2.1.3]	R83		'ACA[c] + NAD[c] --> AC[c] + NADH[c]'	Aldehyde dehydrogenase (NAD dependent) [ec:1.2.1.3]	R83		'ACA[c] + NAD[c] --> AC[c] + NADH[c]'	Aldehyde dehydrogenase (NAD dependent) [ec:1.2.1.3]	R83		'ACA[c] + NAD[c] --> AC[c] + NADH[c]'	Aldehyde dehydrogenase (NAD dependent) [ec:1.2.1.3]	R83		'ACA[c] + NAD[c] --> AC[c] + NADH[c]'	Aldehyde dehydrogenase (NAD dependent) [ec:1.2.1.3]
R84		'ACA[c] + NADH[c] --> ETOH[c] + NAD[c]'	Alcohol dehydrogenase [ec:1.1.1.1]	R84		'ACA[c] + NADH[c] --> ETOH[c] + NAD[c]'	Alcohol dehydrogenase [ec:1.1.1.1]	R84		'ACA[c] + NADH[c] --> ETOH[c] + NAD[c]'	Alcohol dehydrogenase [ec:1.1.1.1]	R84		'ACA[c] + NADH[c] --> ETOH[c] + NAD[c]'	Alcohol dehydrogenase [ec:1.1.1.1]	R84		'ACA[c] + NADH[c] --> ETOH[c] + NAD[c]'	Alcohol dehydrogenase [ec:1.1.1.1]
R85		'PYR[c] + NADH[c] --> LAC[c] + NAD[c]'	Lactate dehydrogenase [ec:1.1.1.27]	R85		'PYR[c] + NADH[c] --> LAC[c] + NAD[c]'	Lactate dehydrogenase [ec:1.1.1.27]	R85		'PYR[c] + NADH[c] --> LAC[c] + NAD[c]'	Lactate dehydrogenase [ec:1.1.1.27]	R85		'PYR[c] + NADH[c] --> LAC[c] + NAD[c]'	Lactate dehydrogenase [ec:1.1.1.27]	R85		'PYR[c] + NADH[c] --> LAC[c] + NAD[c]'	Lactate dehydrogenase [ec:1.1.1.27]
R86		'ACAC[c] --> ACETONE[c] + CO2[c]'	Acetoacetate decarboxylase [ec:4.1.1.4]	R86		'ACAC[c] --> ACETONE[c] + CO2[c]'	Acetoacetate decarboxylase [ec:4.1.1.4]	R86		'ACAC[c] --> ACETONE[c] + CO2[c]'	Acetoacetate decarboxylase [ec:4.1.1.4]	R86		'ACAC[c] --> ACETONE[c] + CO2[c]'	Acetoacetate decarboxylase [ec:4.1.1.4]	R86		'ACAC[c] --> ACETONE[c] + CO2[c]'	Acetoacetate decarboxylase [ec:4.1.1.4]
R87		'ACAC-CoA[c] + NADPH[c] <--> 3-HBut-CoA[c] + NADP[c]'	3-Hydroxyacyl-CoA dehydrogenase [ec:1.1.1.35]	R87		'ACAC-CoA[c] + NADPH[c] <--> 3-HBut-CoA[c] + NADP[c]'	3-Hydroxyacyl-CoA dehydrogenase [ec:1.1.1.35]	R87		'ACAC-CoA[c] + NADPH[c] <--> 3-HBut-CoA[c] + NADP[c]'	3-Hydroxyacyl-CoA dehydrogenase [ec:1.1.1.35]	R87		'ACAC-CoA[c] + NADPH[c] <--> 3-HBut-CoA[c] + NADP[c]'	3-Hydroxyacyl-CoA dehydrogenase [ec:1.1.1.35]	R87		'ACAC-CoA[c] + NADPH[c] <--> 3-HBut-CoA[c] + NADP[c]'	3-Hydroxyacyl-CoA dehydrogenase [ec:1.1.1.35]
R88		'3-HBut-CoA[c] --> PHB[c] + H-CoA[c]'	Poly(3-hydroxybutyrate) synthase [ec:2.3.1.-]	R88		'3-HBut-CoA[c] --> PHB[c] + H-CoA[c]'	Poly(3-hydroxybutyrate) synthase [ec:2.3.1.-]	R88		'3-HBut-CoA[c] --> PHB[c] + H-CoA[c]'	Poly(3-hydroxybutyrate) synthase [ec:2.3.1.-]	R88		'3-HBut-CoA[c] --> PHB[c] + H-CoA[c]'	Poly(3-hydroxybutyrate) synthase [ec:2.3.1.-]	R88		'3-HBut-CoA[c] --> PHB[c] + H-CoA[c]'	Poly(3-hydroxybutyrate) synthase [ec:2.3.1.-]
R89		'PHB[c] + NAD[c] --> ACAC[c] + NADH[c]'	PHA depolymerase [ec:3.1.1.75]	R89		'PHB[c] + NAD[c] --> ACAC[c] + NADH[c]'	PHA depolymerase [ec:3.1.1.75]	R89		'PHB[c] + NAD[c] --> ACAC[c] + NADH[c]'	PHA depolymerase [ec:3.1.1.75]	R89		'PHB[c] + NAD[c] --> ACAC[c] + NADH[c]'	PHA depolymerase [ec:3.1.1.75]	R89		'PHB[c] + NAD[c] --> ACAC[c] + NADH[c]'	PHA depolymerase [ec:3.1.1.75]
R90		'aKG[c] + NADPH[c] + NH3[c] <--> GLU[c] + NADP[c]'	Glutamate dehydrogenase [ec:1.4.1.2]	R90		'aKG[c] + NADPH[c] + NH3[c] <--> GLU[c] + NADP[c]'	Glutamate dehydrogenase [ec:1.4.1.2]	R90		'aKG[c] + NADPH[c] + NH3[c] <--> GLU[c] + NADP[c]'	Glutamate dehydrogenase [ec:1.4.1.2]	R90		'aKG[c] + NADPH[c] + NH3[c] <--> GLU[c] + NADP[c]'	Glutamate dehydrogenase [ec:1.4.1.2]	R90		'aKG[c] + NADPH[c] + NH3[c] <--> GLU[c] + NADP[c]'	Glutamate dehydrogenase [ec:1.4.1.2]
R91		'GLU[c] + NH3[c] + ATP[c] <--> GLN[c] + ADP[c] + Pi[c]'	Glutamine synthase [ec:6.3.1.2]	R91		'GLU[c] + NH3[c] + ATP[c] <--> GLN[c] + ADP[c] + Pi[c]'	Glutamine synthase [ec:6.3.1.2]	R91		'GLU[c] + NH3[c] + ATP[c] <--> GLN[c] + ADP[c] + Pi[c]'	Glutamine synthase [ec:6.3.1.2]	R91		'GLU[c] + NH3[c] + ATP[c] <--> GLN[c] + ADP[c] + Pi[c]'	Glutamine synthase [ec:6.3.1.2]	R91		'GLU[c] + NH3[c] + ATP[c] <--> GLN[c] + ADP[c] + Pi[c]'	Glutamine synthase [ec:6.3.1.2]
R92		'0.021 G6P[c] + 0.007 F6P[c] + 0.09 R5P[c] + 0.036 E4P[c] + 0.013 G3P[c] + 0.15 3-PG[c] + 0.052 PEP[c] + 0.283 PYR[c] + 0.374 AC-CoA[c] + 0.179 OXA[c] + 0.832 GLU[c] + 0.025 GLN[c] + 4.11 ATP[c] + 0.826 NADPH[c] + 0.312 NAD[c] --> BIOMASS[c] + 0.751 aKG[c] + 0.261 CO2[c] + 0.374 H-CoA[c] + 4.11 ADP[c] + 4.479 Pi[c] + 0.826 NADP[c] + 0.312 NADH[c]'	Biomass formation	R92		'0.021 G6P[c] + 0.007 F6P[c] + 0.09 R5P[c] + 0.036 E4P[c] + 0.013 G3P[c] + 0.15 3-PG[c] + 0.052 PEP[c] + 0.283 PYR[c] + 0.374 AC-CoA[c] + 0.179 OXA[c] + 0.832 GLU[c] + 0.025 GLN[c] + 4.11 ATP[c] + 0.826 NADPH[c] + 0.312 NAD[c] --> BIOMASS[c] + 0.751 aKG[c] + 0.261 CO2[c] + 0.374 H-CoA[c] + 4.11 ADP[c] + 4.479 Pi[c] + 0.826 NADP[c] + 0.312 NADH[c]'	Biomass formation	R92		'0.021 G6P[c] + 0.007 F6P[c] + 0.09 R5P[c] + 0.036 E4P[c] + 0.013 G3P[c] + 0.15 3-PG[c] + 0.052 PEP[c] + 0.283 PYR[c] + 0.374 AC-CoA[c] + 0.179 OXA[c] + 0.832 GLU[c] + 0.025 GLN[c] + 4.11 ATP[c] + 0.826 NADPH[c] + 0.312 NAD[c] --> BIOMASS[c] + 0.751 aKG[c] + 0.261 CO2[c] + 0.374 H-CoA[c] + 4.11 ADP[c] + 4.479 Pi[c] + 0.826 NADP[c] + 0.312 NADH[c]'	Biomass formation	R92		'0.021 G6P[c] + 0.007 F6P[c] + 0.09 R5P[c] + 0.036 E4P[c] + 0.013 G3P[c] + 0.15 3-PG[c] + 0.052 PEP[c] + 0.283 PYR[c] + 0.374 AC-CoA[c] + 0.179 OXA[c] + 0.832 GLU[c] + 0.025 GLN[c] + 4.11 ATP[c] + 0.826 NADPH[c] + 0.312 NAD[c] --> BIOMASS[c] + 0.751 aKG[c] + 0.261 CO2[c] + 0.374 H-CoA[c] + 4.11 ADP[c] + 4.479 Pi[c] + 0.826 NADP[c] + 0.312 NADH[c]'	Biomass formation	R92		'0.021 G6P[c] + 0.007 F6P[c] + 0.09 R5P[c] + 0.036 E4P[c] + 0.013 G3P[c] + 0.15 3-PG[c] + 0.052 PEP[c] + 0.283 PYR[c] + 0.374 AC-CoA[c] + 0.179 OXA[c] + 0.832 GLU[c] + 0.025 GLN[c] + 4.11 ATP[c] + 0.826 NADPH[c] + 0.312 NAD[c] --> BIOMASS[c] + 0.751 aKG[c] + 0.261 CO2[c] + 0.374 H-CoA[c] + 4.11 ADP[c] + 4.479 Pi[c] + 0.826 NADP[c] + 0.312 NADH[c]'	Biomass formation
R93		'NADH[c] + FAD[c] --> NAD[c] + FADH2[c]'	Flavin reductase (NAD dependent) [ec:1.5.1.36]	R93		'NADH[c] + FAD[c] --> NAD[c] + FADH2[c]'	Flavin reductase (NAD dependent) [ec:1.5.1.36]	R93		'NADH[c] + FAD[c] --> NAD[c] + FADH2[c]'	Flavin reductase (NAD dependent) [ec:1.5.1.36]	R93		'NADH[c] + FAD[c] --> NAD[c] + FADH2[c]'	Flavin reductase (NAD dependent) [ec:1.5.1.36]	R93		'NADH[c] + FAD[c] --> NAD[c] + FADH2[c]'	Flavin reductase (NAD dependent) [ec:1.5.1.36]
R94		'NADPH[c] + NAD[c] --> NADP[c] + NADH[c]'	NAD(P) transhydrogenase [ec:1.6.1.3]	R94		'NADPH[c] + NAD[c] --> NADP[c] + NADH[c]'	NAD(P) transhydrogenase [ec:1.6.1.3]	R94		'NADPH[c] + NAD[c] --> NADP[c] + NADH[c]'	NAD(P) transhydrogenase [ec:1.6.1.3]	R94		'NADPH[c] + NAD[c] --> NADP[c] + NADH[c]'	NAD(P) transhydrogenase [ec:1.6.1.3]	R94		'NADPH[c] + NAD[c] --> NADP[c] + NADH[c]'	NAD(P) transhydrogenase [ec:1.6.1.3]
R95		'NADH[c] + NADP[c] + H[e] --> NAD[c] + NADPH[c] + H[c]'	NAD(P) transhydrogenase (Re/Si-specific) [ec:1.6.1.2]	R95		'NADH[c] + NADP[c] + H[e] --> NAD[c] + NADPH[c] + H[c]'	NAD(P) transhydrogenase (Re/Si-specific) [ec:1.6.1.2]	R95		'NADH[c] + NADP[c] + H[e] --> NAD[c] + NADPH[c] + H[c]'	NAD(P) transhydrogenase (Re/Si-specific) [ec:1.6.1.2]	R95		'NADH[c] + NADP[c] + H[e] --> NAD[c] + NADPH[c] + H[c]'	NAD(P) transhydrogenase (Re/Si-specific) [ec:1.6.1.2]	R95		'NADH[c] + NADP[c] + H[e] --> NAD[c] + NADPH[c] + H[c]'	NAD(P) transhydrogenase (Re/Si-specific) [ec:1.6.1.2]
R96		'H2[c] + NAD[c] --> NADH[c]'	Hydrogen dehydrogenase [ec:1.12.1.2]	R96		'H2[c] + NAD[c] --> NADH[c]'	Hydrogen dehydrogenase [ec:1.12.1.2]	R96		'H2[c] + NAD[c] --> NADH[c]'	Hydrogen dehydrogenase [ec:1.12.1.2]	R96		'H2[c] + NAD[c] --> NADH[c]'	Hydrogen dehydrogenase [ec:1.12.1.2]	R96		'H2[c] + NAD[c] --> NADH[c]'	Hydrogen dehydrogenase [ec:1.12.1.2]
R97		'UQ[c] + H2[c] --> UQH2[c]'	Hydrogen dehydrogenase [ec:1.12.99.6]	R97		'UQ[c] + H2[c] --> UQH2[c]'	Hydrogen dehydrogenase [ec:1.12.99.6]	R97		'UQ[c] + H2[c] --> UQH2[c]'	Hydrogen dehydrogenase [ec:1.12.99.6]	R97		'UQ[c] + H2[c] --> UQH2[c]'	Hydrogen dehydrogenase [ec:1.12.99.6]	R97		'UQ[c] + H2[c] --> UQH2[c]'	Hydrogen dehydrogenase [ec:1.12.99.6]
R98		'NADH[c] + UQ[c] --> NAD[c] + UQH2[c]'	NADH-quinone oxidoreductase [ec:1.6.5.9]	R98		'NADH[c] + UQ[c] --> NAD[c] + UQH2[c]'	NADH-quinone oxidoreductase [ec:1.6.5.9]	R98		'NADH[c] + UQ[c] --> NAD[c] + UQH2[c]'	NADH-quinone oxidoreductase [ec:1.6.5.9]	R98		'NADH[c] + UQ[c] --> NAD[c] + UQH2[c]'	NADH-quinone oxidoreductase [ec:1.6.5.9]	R98		'NADH[c] + UQ[c] --> NAD[c] + UQH2[c]'	NADH-quinone oxidoreductase [ec:1.6.5.9]
R99		'NADH[c] + UQ[c] + 4 H[c] --> NAD[c] + UQH2[c] + 4 H[e]'	NADH-quinone oxidoreductase [ec:7.1.1.2]	R99		'NADH[c] + UQ[c] + 4 H[c] --> NAD[c] + UQH2[c] + 4 H[e]'	NADH-quinone oxidoreductase [ec:7.1.1.2]	R99		'NADH[c] + UQ[c] + 4 H[c] --> NAD[c] + UQH2[c] + 4 H[e]'	NADH-quinone oxidoreductase [ec:7.1.1.2]	R99		'NADH[c] + UQ[c] + 4 H[c] --> NAD[c] + UQH2[c] + 4 H[e]'	NADH-quinone oxidoreductase [ec:7.1.1.2]	R99		'NADH[c] + UQ[c] + 4 H[c] --> NAD[c] + UQH2[c] + 4 H[e]'	NADH-quinone oxidoreductase [ec:7.1.1.2]
R100		'UQH2[c] + 4 H[c] + 0.5 O2[c] --> UQ[c] + 4 H[e]'	Cytochrome bd oxidase [ec:7.1.1.7]	R100		'UQH2[c] + 4 H[c] + 0.5 O2[c] --> UQ[c] + 4 H[e]'	Cytochrome bd oxidase [ec:7.1.1.7]	R100		'UQH2[c] + 4 H[c] + 0.5 O2[c] --> UQ[c] + 4 H[e]'	Cytochrome bd oxidase [ec:7.1.1.7]	R100		'UQH2[c] + 4 H[c] + 0.5 O2[c] --> UQ[c] + 4 H[e]'	Cytochrome bd oxidase [ec:7.1.1.7]	R100		'UQH2[c] + 4 H[c] + 0.5 O2[c] --> UQ[c] + 4 H[e]'	Cytochrome bd oxidase [ec:7.1.1.7]
R101		'UQH2[c] + 2 H[c] + 0.5 O2[c] --> UQ[c] + 2 H[e]'	Cytochrome bo oxidase [ec:7.1.1.3]	R101		'UQH2[c] + 2 H[c] + 0.5 O2[c] --> UQ[c] + 2 H[e]'	Cytochrome bo oxidase [ec:7.1.1.3]	R101		'UQH2[c] + 2 H[c] + 0.5 O2[c] --> UQ[c] + 2 H[e]'	Cytochrome bo oxidase [ec:7.1.1.3]	R101		'UQH2[c] + 2 H[c] + 0.5 O2[c] --> UQ[c] + 2 H[e]'	Cytochrome bo oxidase [ec:7.1.1.3]	R101		'UQH2[c] + 2 H[c] + 0.5 O2[c] --> UQ[c] + 2 H[e]'	Cytochrome bo oxidase [ec:7.1.1.3]
R102		'ADP[c] + 4 H[e] + Pi[c] --> ATP[c] + 4 H[c]'	ATP synthase [ec:3.6.3.14]	R102		'ADP[c] + 4 H[e] + Pi[c] --> ATP[c] + 4 H[c]'	ATP synthase [ec:3.6.3.14]	R102		'ADP[c] + 4 H[e] + Pi[c] --> ATP[c] + 4 H[c]'	ATP synthase [ec:3.6.3.14]	R102		'ADP[c] + 4 H[e] + Pi[c] --> ATP[c] + 4 H[c]'	ATP synthase [ec:3.6.3.14]	R102		'ADP[c] + 4 H[e] + Pi[c] --> ATP[c] + 4 H[c]'	ATP synthase [ec:3.6.3.14]
R103		'ADP[c] + 3 H[e] + Pi[c] <-- ATP[c] + 3 H[c]'	reverse ATP synthase (proton pump) [ec:3.6.3.14]	R103		'ADP[c] + 3 H[e] + Pi[c] <-- ATP[c] + 3 H[c]'	reverse ATP synthase (proton pump) [ec:3.6.3.14]	R103		'ADP[c] + 3 H[e] + Pi[c] <-- ATP[c] + 3 H[c]'	reverse ATP synthase (proton pump) [ec:3.6.3.14]	R103		'ADP[c] + 3 H[e] + Pi[c] <-- ATP[c] + 3 H[c]'	reverse ATP synthase (proton pump) [ec:3.6.3.14]	R103		'ADP[c] + 3 H[e] + Pi[c] <-- ATP[c] + 3 H[c]'	reverse ATP synthase (proton pump) [ec:3.6.3.14]
R104		'AMP[c] + ATP[c] --> 2 ADP[c]'	Adenylate kinase [ec:2.7.4.3]	R104		'AMP[c] + ATP[c] --> 2 ADP[c]'	Adenylate kinase [ec:2.7.4.3]	R104		'AMP[c] + ATP[c] --> 2 ADP[c]'	Adenylate kinase [ec:2.7.4.3]	R104		'AMP[c] + ATP[c] --> 2 ADP[c]'	Adenylate kinase [ec:2.7.4.3]	R104		'AMP[c] + ATP[c] --> 2 ADP[c]'	Adenylate kinase [ec:2.7.4.3]
R105		'LAC[c] + AC-CoA[c] <--> LAC-CoA[c] + AC[c]'	Propionate CoA-transferase [ec:2.8.3.1]	R105		'LAC[c] + AC-CoA[c] <--> LAC-CoA[c] + AC[c]'	Propionate CoA-transferase [ec:2.8.3.1]	R105		'LAC[c] + AC-CoA[c] <--> LAC-CoA[c] + AC[c]'	Propionate CoA-transferase [ec:2.8.3.1]	R105		'LAC[c] + AC-CoA[c] <--> LAC-CoA[c] + AC[c]'	Propionate CoA-transferase [ec:2.8.3.1]	R105		'LAC[c] + AC-CoA[c] <--> LAC-CoA[c] + AC[c]'	Propionate CoA-transferase [ec:2.8.3.1]
R106		'LAC-CoA[c] --> P-L[c] + H-CoA[c]'	Poly(hydroxyalkanoate) synthase [ec:2.3.1.-]	R106		'LAC-CoA[c] --> P-L[c] + H-CoA[c]'	Poly(hydroxyalkanoate) synthase [ec:2.3.1.-]	R106		'LAC-CoA[c] --> P-L[c] + H-CoA[c]'	Poly(hydroxyalkanoate) synthase [ec:2.3.1.-]	R106		'LAC-CoA[c] --> P-L[c] + H-CoA[c]'	Poly(hydroxyalkanoate) synthase [ec:2.3.1.-]	R106		'LAC-CoA[c] --> P-L[c] + H-CoA[c]'	Poly(hydroxyalkanoate) synthase [ec:2.3.1.-]
	};				};				};				};				};
	mnet = CalculateFluxModes(ReactionFormulas,CreateFluxModeOpts('parse-only',true));				mnet = CalculateFluxModes(ReactionFormulas,CreateFluxModeOpts('parse-only',true));				mnet = CalculateFluxModes(ReactionFormulas,CreateFluxModeOpts('parse-only',true));				mnet = CalculateFluxModes(ReactionFormulas,CreateFluxModeOpts('parse-only',true));				mnet = CalculateFluxModes(ReactionFormulas,CreateFluxModeOpts('parse-only',true));

## Sheet: P3HP
	C. necator on Fructose + CO2				C. necator on Glycerol + CO2				C. necator on Acetate + CO2				C. necator on Formate + CO2				C. necator on CO2 + H2
RxN		Equation	Function / Enzyme	RxN		Equation	Function / Enzyme	RxN		Equation	Function / Enzyme	RxN		Equation	Function / Enzyme	RxN		Equation	Function / Enzyme
R1	ReactionFormulas = {	'--> CO2[e]'	Carbondioxide in	R1	ReactionFormulas = {	'--> CO2[e]'	Carbondioxide in	R1	ReactionFormulas = {	'--> CO2[e]'	Carbondioxide in	R1	ReactionFormulas = {	'--> CO2[e]'	Carbondioxide in	R1	ReactionFormulas = {	'--> CO2[e]'	Carbondioxide in
R2		'--> FRC[e]'	Fructose in	R2		'--> GLY[e]'	Fructose in	R2		'--> AC[e]'	Fructose in	R2		'--> FOR[e]'	Fructose in	R2		'--> H2[e]'	Hydrogen in
R3		'--> NH3[e]'	Ammonia in	R3		'--> NH3[e]'	Ammonia in	R3		'--> NH3[e]'	Ammonia in	R3		'--> NH3[e]'	Ammonia in	R3		'--> NH3[e]'	Ammonia in
R4		'--> O2[e]'	Oxygen in	R4		'--> O2[e]'	Oxygen in	R4		'--> O2[e]'	Oxygen in	R4		'--> O2[e]'	Oxygen in	R4		'--> O2[e]'	Oxygen in
R5		'CO2[e] -->'	Carbondioxide out	R5		'CO2[e] -->'	Carbondioxide out	R5		'CO2[e] -->'	Carbondioxide out	R5		'CO2[e] -->'	Carbondioxide out	R5		'CO2[e] -->'	Carbondioxide out
R6		'FOR[e] -->'	Formate out	R6		'FOR[e] -->'	Formate out	R6		'FOR[e] -->'	Formate out	R6		'FOR[e] -->'	Formate out	R6		'FOR[e] -->'	Formate out
R7		'AC[e] -->'	Acetate out	R7		'AC[e] -->'	Acetate out	R7		'AC[e] -->'	Acetate out	R7		'AC[e] -->'	Acetate out	R7		'AC[e] -->'	Acetate out
R8		'ETOH[e] -->'	Ethanol out	R8		'ETOH[e] -->'	Ethanol out	R8		'ETOH[e] -->'	Ethanol out	R8		'ETOH[e] -->'	Ethanol out	R8		'ETOH[e] -->'	Ethanol out
R9		'LAC[e] -->'	Lactate out	R9		'LAC[e] -->'	Lactate out	R9		'LAC[e] -->'	Lactate out	R9		'LAC[e] -->'	Lactate out	R9		'LAC[e] -->'	Lactate out
R10		'ACETONE[e] -->'	Acetone out	R10		'ACETONE[e] -->'	Acetone out	R10		'ACETONE[e] -->'	Acetone out	R10		'ACETONE[e] -->'	Acetone out	R10		'ACETONE[e] -->'	Acetone out
R11		'SUC[e] -->'	Succinate out	R11		'SUC[e] -->'	Succinate out	R11		'SUC[e] -->'	Succinate out	R11		'SUC[e] -->'	Succinate out	R11		'SUC[e] -->'	Succinate out
R12		'PHB[e] -->'	Polyhydroxybutyrate out	R12		'PHB[e] -->'	Polyhydroxybutyrate out	R12		'PHB[e] -->'	Polyhydroxybutyrate out	R12		'PHB[e] -->'	Polyhydroxybutyrate out	R12		'PHB[e] -->'	Polyhydroxybutyrate out
R13		'BIOMASS[e] -->'	Biomass out	R13		'BIOMASS[e] -->'	Biomass out	R13		'BIOMASS[e] -->'	Biomass out	R13		'BIOMASS[e] -->'	Biomass out	R13		'BIOMASS[e] -->'	Biomass out
R14		'PRODUCT[e] -->'	Product out	R14		'PRODUCT[e] -->'	Product out	R14		'PRODUCT[e] -->'	Product out	R14		'PRODUCT[e] -->'	Product out	R14		'PRODUCT[e] -->'	Product out
R15		'FOR[c] + H[c] + 0.3 ATP[c] --> FOR[e] + H[e] + 0.3 ADP[c] + 0.3 Pi[c]'	Formate export by ABC transporter	R15		'FOR[c] + H[c] + 0.3 ATP[c] --> FOR[e] + H[e] + 0.3 ADP[c] + 0.3 Pi[c]'	Formate export by ABC transporter	R15		'FOR[c] + H[c] + 0.3 ATP[c] --> FOR[e] + H[e] + 0.3 ADP[c] + 0.3 Pi[c]'	Formate export by ABC transporter	R15		'FOR[c] + H[c] <-- FOR[e] + H[e]'	Formate export by ABC transporter	R15		'FOR[c] + H[c] + 0.3 ATP[c] --> FOR[e] + H[e] + 0.3 ADP[c] + 0.3 Pi[c]'	Formate export by ABC transporter
R16		'AC[c] + H[c] + 0.3 ATP[c] --> AC[e] + H[e] + 0.3 ADP[c] + 0.3 Pi[c]'	Acetate export by ABC transporter	R16		'AC[c] + H[c] + 0.3 ATP[c] --> AC[e] + H[e] + 0.3 ADP[c] + 0.3 Pi[c]'	Acetate export by ABC transporter	R16		'AC[c] + H[c] <-- AC[e] + H[e]'	Acetate export by ABC transporter	R16		'AC[c] + H[c] + 0.3 ATP[c] --> AC[e] + H[e] + 0.3 ADP[c] + 0.3 Pi[c]'	Acetate export by ABC transporter	R16		'AC[c] + H[c] + 0.3 ATP[c] --> AC[e] + H[e] + 0.3 ADP[c] + 0.3 Pi[c]'	Acetate export by ABC transporter
R17		'ETOH[c] --> ETOH[e]'	Ethanol export by diffusion	R17		'ETOH[c] --> ETOH[e]'	Ethanol export by diffusion	R17		'ETOH[c] --> ETOH[e]'	Ethanol export by diffusion	R17		'ETOH[c] --> ETOH[e]'	Ethanol export by diffusion	R17		'ETOH[c] --> ETOH[e]'	Ethanol export by diffusion
R18		'LAC[c] + H[c] + 0.3 ATP[c] --> LAC[e] + H[e] + 0.3 ADP[c] + 0.3 Pi[c]'	Lactate export by ABC transporter	R18		'LAC[c] + H[c] + 0.3 ATP[c] --> LAC[e] + H[e] + 0.3 ADP[c] + 0.3 Pi[c]'	Lactate export by ABC transporter	R18		'LAC[c] + H[c] + 0.3 ATP[c] --> LAC[e] + H[e] + 0.3 ADP[c] + 0.3 Pi[c]'	Lactate export by ABC transporter	R18		'LAC[c] + H[c] + 0.3 ATP[c] --> LAC[e] + H[e] + 0.3 ADP[c] + 0.3 Pi[c]'	Lactate export by ABC transporter	R18		'LAC[c] + H[c] + 0.3 ATP[c] --> LAC[e] + H[e] + 0.3 ADP[c] + 0.3 Pi[c]'	Lactate export by ABC transporter
R19		'ACETONE[c] --> ACETONE[e]'	Acetone export by diffusion	R19		'ACETONE[c] --> ACETONE[e]'	Acetone export by diffusion	R19		'ACETONE[c] --> ACETONE[e]'	Acetone export by diffusion	R19		'ACETONE[c] --> ACETONE[e]'	Acetone export by diffusion	R19		'ACETONE[c] --> ACETONE[e]'	Acetone export by diffusion
R20		'SUC[c] + 2 H[c] + 0.6 ATP[c] --> SUC[e] + 2 H[e] + 0.6 ADP[c] + 0.6 Pi[c]'	Succinate export by ABC transporter	R20		'SUC[c] + 2 H[c] + 0.6 ATP[c] --> SUC[e] + 2 H[e] + 0.6 ADP[c] + 0.6 Pi[c]'	Succinate export by ABC transporter	R20		'SUC[c] + 2 H[c] + 0.6 ATP[c] --> SUC[e] + 2 H[e] + 0.6 ADP[c] + 0.6 Pi[c]'	Succinate export by ABC transporter	R20		'SUC[c] + 2 H[c] + 0.6 ATP[c] --> SUC[e] + 2 H[e] + 0.6 ADP[c] + 0.6 Pi[c]'	Succinate export by ABC transporter	R20		'SUC[c] + 2 H[c] + 0.6 ATP[c] --> SUC[e] + 2 H[e] + 0.6 ADP[c] + 0.6 Pi[c]'	Succinate export by ABC transporter
R21		'BIOMASS[c] --> BIOMASS[e]'	Growth	R21		'BIOMASS[c] --> BIOMASS[e]'	Growth	R21		'BIOMASS[c] --> BIOMASS[e]'	Growth	R21		'BIOMASS[c] --> BIOMASS[e]'	Growth	R21		'BIOMASS[c] --> BIOMASS[e]'	Growth
R22		'P-3HP[c] --> PRODUCT[e]'	Product formation	R22		'P-3HP[c] --> PRODUCT[e]'	Product formation	R22		'P-3HP[c] --> PRODUCT[e]'	Product formation	R22		'P-3HP[c] --> PRODUCT[e]'	Product formation	R22		'P-3HP[c] --> PRODUCT[e]'	Product formation
R23		'O2[e] --> O2[c]'	Oxygen import by diffusion	R23		'O2[e] --> O2[c]'	Oxygen import by diffusion	R23		'O2[e] --> O2[c]'	Oxygen import by diffusion	R23		'O2[e] --> O2[c]'	Oxygen import by diffusion	R23		'O2[e] --> O2[c]'	Oxygen import by diffusion
R24		'NH3[e] --> NH3[c]'	Ammonia import by diffusion	R24		'NH3[e] --> NH3[c]'	Ammonia import by diffusion	R24		'NH3[e] --> NH3[c]'	Ammonia import by diffusion	R24		'NH3[e] --> NH3[c]'	Ammonia import by diffusion	R24		'NH3[e] --> NH3[c]'	Ammonia import by diffusion
R25		'H2[e] --> H2[c]'	Hydrogen import by diffusion	R25		'H2[e] --> H2[c]'	Hydrogen import by diffusion	R25		'H2[e] --> H2[c]'	Hydrogen import by diffusion	R25		'H2[e] --> H2[c]'	Hydrogen import by diffusion	R25		'H2[e] --> H2[c]'	Hydrogen import by diffusion
R26		'CO2[e] <--> CO2[c]'	Carbondioxide import by diffusion	R26		'CO2[e] <--> CO2[c]'	Carbondioxide import by diffusion	R26		'CO2[e] <--> CO2[c]'	Carbondioxide import by diffusion	R26		'CO2[e] <--> CO2[c]'	Carbondioxide import by diffusion	R26		'CO2[e] <--> CO2[c]'	Carbondioxide exchange by diffusion
R27		'FRC[e] + PEP[c] --> F6P[c] + PYR[c]'	PTS [ec:2.7.1.69]	R27		'FRC[e] + PEP[c] --> F6P[c] + PYR[c]'	PTS [ec:2.7.1.69]	R27		'FRC[e] + PEP[c] --> F6P[c] + PYR[c]'	PTS [ec:2.7.1.69]	R27		'FRC[e] + PEP[c] --> F6P[c] + PYR[c]'	PTS [ec:2.7.1.69]	R27		'FRC[e] + PEP[c] --> F6P[c] + PYR[c]'	PTS [ec:2.7.1.69]
R28		'GLY[e] + ATP[c] --> ADP[c] + GLY3P[c]'	Glycerol kinase [ec:2.7.1.30]	R28		'GLY[e] + ATP[c] --> ADP[c] + GLY3P[c]'	Glycerol kinase [ec:2.7.1.30]	R28		'GLY[e] + ATP[c] --> ADP[c] + GLY3P[c]'	Glycerol kinase [ec:2.7.1.30]	R28		'GLY[e] + ATP[c] --> ADP[c] + GLY3P[c]'	Glycerol kinase [ec:2.7.1.30]	R28		'GLY[e] + ATP[c] --> ADP[c] + GLY3P[c]'	Glycerol kinase [ec:2.7.1.30]
R29		'G6P[c] + NADP[c] --> 6-PG-lac[c] + NADPH[c]'	Glucose-6-phosphate dehydrogenase [ec:1.1.1.49]	R29		'G6P[c] + NADP[c] --> 6-PG-lac[c] + NADPH[c]'	Glucose-6-phosphate dehydrogenase [ec:1.1.1.49]	R29		'G6P[c] + NADP[c] --> 6-PG-lac[c] + NADPH[c]'	Glucose-6-phosphate dehydrogenase [ec:1.1.1.49]	R29		'G6P[c] + NADP[c] --> 6-PG-lac[c] + NADPH[c]'	Glucose-6-phosphate dehydrogenase [ec:1.1.1.49]	R29		'G6P[c] + NADP[c] --> 6-PG-lac[c] + NADPH[c]'	Glucose-6-phosphate dehydrogenase [ec:1.1.1.49]
R30		'6-PG-lac[c] --> 6-PG[c]'	6-phosphogluconolactonase [ec:3.1.1.31]	R30		'6-PG-lac[c] --> 6-PG[c]'	6-phosphogluconolactonase [ec:3.1.1.31]	R30		'6-PG-lac[c] --> 6-PG[c]'	6-phosphogluconolactonase [ec:3.1.1.31]	R30		'6-PG-lac[c] --> 6-PG[c]'	6-phosphogluconolactonase [ec:3.1.1.31]	R30		'6-PG-lac[c] --> 6-PG[c]'	6-phosphogluconolactonase [ec:3.1.1.31]
R31		'6-PG[c] --> KDPG[c]'	6-phosphogluconate dehydratase [ec:4.2.1.12]	R31		'6-PG[c] --> KDPG[c]'	6-phosphogluconate dehydratase [ec:4.2.1.12]	R31		'6-PG[c] --> KDPG[c]'	6-phosphogluconate dehydratase [ec:4.2.1.12]	R31		'6-PG[c] --> KDPG[c]'	6-phosphogluconate dehydratase [ec:4.2.1.12]	R31		'6-PG[c] --> KDPG[c]'	6-phosphogluconate dehydratase [ec:4.2.1.12]
R32		'KDPG[c] --> G3P[c] + PYR[c]'	2-keto-3-deoxy-6-phosphogluconate aldolase [ec:4.1.2.14]	R32		'KDPG[c] --> G3P[c] + PYR[c]'	2-keto-3-deoxy-6-phosphogluconate aldolase [ec:4.1.2.14]	R32		'KDPG[c] --> G3P[c] + PYR[c]'	2-keto-3-deoxy-6-phosphogluconate aldolase [ec:4.1.2.14]	R32		'KDPG[c] --> G3P[c] + PYR[c]'	2-keto-3-deoxy-6-phosphogluconate aldolase [ec:4.1.2.14]	R32		'KDPG[c] --> G3P[c] + PYR[c]'	2-keto-3-deoxy-6-phosphogluconate aldolase [ec:4.1.2.14]
R33		'6-PG[c] + NADP[c] --> Ril5P[c] + NADPH[c] + CO2[c]'	6-phosphogluconate dehydrogenase [ec:1.1.1.44]	R33		'6-PG[c] + NADP[c] --> Ril5P[c] + NADPH[c] + CO2[c]'	6-phosphogluconate dehydrogenase [ec:1.1.1.44]	R33		'6-PG[c] + NADP[c] --> Ril5P[c] + NADPH[c] + CO2[c]'	6-phosphogluconate dehydrogenase [ec:1.1.1.44]	R33		'6-PG[c] + NADP[c] --> Ril5P[c] + NADPH[c] + CO2[c]'	6-phosphogluconate dehydrogenase [ec:1.1.1.44]	R33		'6-PG[c] + NADP[c] --> Ril5P[c] + NADPH[c] + CO2[c]'	6-phosphogluconate dehydrogenase [ec:1.1.1.44]
R34		'Ril5P[c] + ATP[c] --> Ril15BP[c] + ADP[c]'	Phosphoribulokinase [ec:2.7.1.19]	R34		'Ril5P[c] + ATP[c] --> Ril15BP[c] + ADP[c]'	Phosphoribulokinase [ec:2.7.1.19]	R34		'Ril5P[c] + ATP[c] --> Ril15BP[c] + ADP[c]'	Phosphoribulokinase [ec:2.7.1.19]	R34		'Ril5P[c] + ATP[c] --> Ril15BP[c] + ADP[c]'	Phosphoribulokinase [ec:2.7.1.19]	R34		'Ril5P[c] + ATP[c] --> Ril15BP[c] + ADP[c]'	Phosphoribulokinase [ec:2.7.1.19]
R35		'5 Ril15BP[c] + 4 CO2[c] + 1 O2[c] --> 9 3-PG[c] + 1 PG[c]'	Ribulose-1,5-bisphosphate carboxylase/oxygenase (RuBisCO) "best case" [ec:4.1.1.39]	R35		'5 Ril15BP[c] + 4 CO2[c] + 1 O2[c] --> 9 3-PG[c] + 1 PG[c]'	Ribulose-1,5-bisphosphate carboxylase/oxygenase (RuBisCO) "best case" [ec:4.1.1.39]	R35		'5 Ril15BP[c] + 4 CO2[c] + 1 O2[c] --> 9 3-PG[c] + 1 PG[c]'	Ribulose-1,5-bisphosphate carboxylase/oxygenase (RuBisCO) "best case" [ec:4.1.1.39]	R35		'5 Ril15BP[c] + 4 CO2[c] + 1 O2[c] --> 9 3-PG[c] + 1 PG[c]'	Ribulose-1,5-bisphosphate carboxylase/oxygenase (RuBisCO) "best case" [ec:4.1.1.39]	R35		'5 Ril15BP[c] + 4 CO2[c] + 1 O2[c] --> 9 3-PG[c] + 1 PG[c]'	Ribulose-1,5-bisphosphate carboxylase/oxygenase (RuBisCO) "best case" [ec:4.1.1.39]
R36		'4 Ril15BP[c] + 3 CO2[c] + 1 O2[c] --> 7 3-PG[c] + 1 PG[c]'	Ribulose-1,5-bisphosphate carboxylase/oxygenase (RuBisCO) "worst case" [ec:4.1.1.39]	R36		'4 Ril15BP[c] + 3 CO2[c] + 1 O2[c] --> 7 3-PG[c] + 1 PG[c]'	Ribulose-1,5-bisphosphate carboxylase/oxygenase (RuBisCO) "worst case" [ec:4.1.1.39]	R36		'4 Ril15BP[c] + 3 CO2[c] + 1 O2[c] --> 7 3-PG[c] + 1 PG[c]'	Ribulose-1,5-bisphosphate carboxylase/oxygenase (RuBisCO) "worst case" [ec:4.1.1.39]	R36		'4 Ril15BP[c] + 3 CO2[c] + 1 O2[c] --> 7 3-PG[c] + 1 PG[c]'	Ribulose-1,5-bisphosphate carboxylase/oxygenase (RuBisCO) "worst case" [ec:4.1.1.39]	R36		'4 Ril15BP[c] + 3 CO2[c] + 1 O2[c] --> 7 3-PG[c] + 1 PG[c]'	Ribulose-1,5-bisphosphate carboxylase/oxygenase (RuBisCO) "worst case" [ec:4.1.1.39]
R37		'PG[c] --> GA[c] + Pi[c]'	2-phosphoglycolate phosphohydrolase [ec:3.1.3.18]	R37		'PG[c] --> GA[c] + Pi[c]'	2-phosphoglycolate phosphohydrolase [ec:3.1.3.18]	R37		'PG[c] --> GA[c] + Pi[c]'	2-phosphoglycolate phosphohydrolase [ec:3.1.3.18]	R37		'PG[c] --> GA[c] + Pi[c]'	2-phosphoglycolate phosphohydrolase [ec:3.1.3.18]	R37		'PG[c] --> GA[c] + Pi[c]'	2-phosphoglycolate phosphohydrolase [ec:3.1.3.18]
R38		'2 GA[c] + O2[c] --> 2 GLYOX[c]'	Glycolate dehydrogenase [ec:1.1.99.14]	R38		'2 GA[c] + O2[c] --> 2 GLYOX[c]'	Glycolate dehydrogenase [ec:1.1.99.14]	R38		'2 GA[c] + O2[c] --> 2 GLYOX[c]'	Glycolate dehydrogenase [ec:1.1.99.14]	R38		'2 GA[c] + O2[c] --> 2 GLYOX[c]'	Glycolate dehydrogenase [ec:1.1.99.14]	R38		'2 GA[c] + O2[c] --> 2 GLYOX[c]'	Glycolate dehydrogenase [ec:1.1.99.14]
R39		'2 GLYOX[c] --> TS[c] + CO2[c]'	Tartronate-semialdehyde synthase [ec:4.1.1.47]	R39		'2 GLYOX[c] --> TS[c] + CO2[c]'	Tartronate-semialdehyde synthase [ec:4.1.1.47]	R39		'2 GLYOX[c] --> TS[c] + CO2[c]'	Tartronate-semialdehyde synthase [ec:4.1.1.47]	R39		'2 GLYOX[c] --> TS[c] + CO2[c]'	Tartronate-semialdehyde synthase [ec:4.1.1.47]	R39		'2 GLYOX[c] --> TS[c] + CO2[c]'	Tartronate-semialdehyde synthase [ec:4.1.1.47]
R40		'TS[c] + NADH[c] --> Glycerate[c] + NAD[c]'	2-hydroxy-3-oxopropionate reductase [ec:1.1.1.60]	R40		'TS[c] + NADH[c] --> Glycerate[c] + NAD[c]'	2-hydroxy-3-oxopropionate reductase [ec:1.1.1.60]	R40		'TS[c] + NADH[c] --> Glycerate[c] + NAD[c]'	2-hydroxy-3-oxopropionate reductase [ec:1.1.1.60]	R40		'TS[c] + NADH[c] --> Glycerate[c] + NAD[c]'	2-hydroxy-3-oxopropionate reductase [ec:1.1.1.60]	R40		'TS[c] + NADH[c] --> Glycerate[c] + NAD[c]'	2-hydroxy-3-oxopropionate reductase [ec:1.1.1.60]
R41		'Glycerate[c] + ATP[c] --> 2-PG[c] + ADP[c]'	Glycerate 2-kinase [ec:2.7.1.165]	R41		'Glycerate[c] + ATP[c] --> 2-PG[c] + ADP[c]'	Glycerate 2-kinase [ec:2.7.1.165]	R41		'Glycerate[c] + ATP[c] --> 2-PG[c] + ADP[c]'	Glycerate 2-kinase [ec:2.7.1.165]	R41		'Glycerate[c] + ATP[c] --> 2-PG[c] + ADP[c]'	Glycerate 2-kinase [ec:2.7.1.165]	R41		'Glycerate[c] + ATP[c] --> 2-PG[c] + ADP[c]'	Glycerate 2-kinase [ec:2.7.1.165]
R42		'Ril5P[c] <--> R5P[c]'	Ribose-5-phosphate isomerase [ec:5.3.1.6]	R42		'Ril5P[c] <--> R5P[c]'	Ribose-5-phosphate isomerase [ec:5.3.1.6]	R42		'Ril5P[c] <--> R5P[c]'	Ribose-5-phosphate isomerase [ec:5.3.1.6]	R42		'Ril5P[c] <--> R5P[c]'	Ribose-5-phosphate isomerase [ec:5.3.1.6]	R42		'Ril5P[c] <--> R5P[c]'	Ribose-5-phosphate isomerase [ec:5.3.1.6]
R43		'Ril5P[c] <--> X5P[c]'	Ribulose-phosphate 3-epimerase [ec:5.1.3.1]	R43		'Ril5P[c] <--> X5P[c]'	Ribulose-phosphate 3-epimerase [ec:5.1.3.1]	R43		'Ril5P[c] <--> X5P[c]'	Ribulose-phosphate 3-epimerase [ec:5.1.3.1]	R43		'Ril5P[c] <--> X5P[c]'	Ribulose-phosphate 3-epimerase [ec:5.1.3.1]	R43		'Ril5P[c] <--> X5P[c]'	Ribulose-phosphate 3-epimerase [ec:5.1.3.1]
R44		'R5P[c] + X5P[c] <--> G3P[c] + S7P[c]'	Transketolase [ec:2.2.1.1]	R44		'R5P[c] + X5P[c] <--> G3P[c] + S7P[c]'	Transketolase [ec:2.2.1.1]	R44		'R5P[c] + X5P[c] <--> G3P[c] + S7P[c]'	Transketolase [ec:2.2.1.1]	R44		'R5P[c] + X5P[c] <--> G3P[c] + S7P[c]'	Transketolase [ec:2.2.1.1]	R44		'R5P[c] + X5P[c] <--> G3P[c] + S7P[c]'	Transketolase [ec:2.2.1.1]
R45		'G3P[c] + S7P[c] <--> E4P[c] + F6P[c]'	Transaldolase [ec:2.2.1.2]	R45		'G3P[c] + S7P[c] <--> E4P[c] + F6P[c]'	Transaldolase [ec:2.2.1.2]	R45		'G3P[c] + S7P[c] <--> E4P[c] + F6P[c]'	Transaldolase [ec:2.2.1.2]	R45		'G3P[c] + S7P[c] <--> E4P[c] + F6P[c]'	Transaldolase [ec:2.2.1.2]	R45		'G3P[c] + S7P[c] <--> E4P[c] + F6P[c]'	Transaldolase [ec:2.2.1.2]
R46		'X5P[c] + E4P[c] <--> F6P[c] + G3P[c]'	Transketolase [ec:2.2.1.1]	R46		'X5P[c] + E4P[c] <--> F6P[c] + G3P[c]'	Transketolase [ec:2.2.1.1]	R46		'X5P[c] + E4P[c] <--> F6P[c] + G3P[c]'	Transketolase [ec:2.2.1.1]	R46		'X5P[c] + E4P[c] <--> F6P[c] + G3P[c]'	Transketolase [ec:2.2.1.1]	R46		'X5P[c] + E4P[c] <--> F6P[c] + G3P[c]'	Transketolase [ec:2.2.1.1]
R47		'G6P[c] <--> F6P[c]'	Glucose-6-phosphate isomerase [ec:5.3.1.9]	R47		'G6P[c] <--> F6P[c]'	Glucose-6-phosphate isomerase [ec:5.3.1.9]	R47		'G6P[c] <--> F6P[c]'	Glucose-6-phosphate isomerase [ec:5.3.1.9]	R47		'G6P[c] <--> F6P[c]'	Glucose-6-phosphate isomerase [ec:5.3.1.9]	R47		'G6P[c] <--> F6P[c]'	Glucose-6-phosphate isomerase [ec:5.3.1.9]
R48		'F16BP[c] --> F6P[c] + Pi[c]'	Fructose-bisphosphatase [ec:3.1.3.11]	R48		'F16BP[c] --> F6P[c] + Pi[c]'	Fructose-bisphosphatase [ec:3.1.3.11]	R48		'F16BP[c] --> F6P[c] + Pi[c]'	Fructose-bisphosphatase [ec:3.1.3.11]	R48		'F16BP[c] --> F6P[c] + Pi[c]'	Fructose-bisphosphatase [ec:3.1.3.11]	R48		'F16BP[c] --> F6P[c] + Pi[c]'	Fructose-bisphosphatase [ec:3.1.3.11]
R49		'F16BP[c] <--> G3P[c] + DHAP[c]'	Fructose-bisphosphate aldolase [ec:4.1.2.13]	R49		'F16BP[c] <--> G3P[c] + DHAP[c]'	Fructose-bisphosphate aldolase [ec:4.1.2.13]	R49		'F16BP[c] <--> G3P[c] + DHAP[c]'	Fructose-bisphosphate aldolase [ec:4.1.2.13]	R49		'F16BP[c] <--> G3P[c] + DHAP[c]'	Fructose-bisphosphate aldolase [ec:4.1.2.13]	R49		'F16BP[c] <--> G3P[c] + DHAP[c]'	Fructose-bisphosphate aldolase [ec:4.1.2.13]
R50		'GLY3P[c] + NAD[c] --> DHAP[c] + NADH[c]'	Glycerol-3-phosphate dehydrogenase [ec:1.1.1.8]	R50		'GLY3P[c] + NAD[c] --> DHAP[c] + NADH[c]'	Glycerol-3-phosphate dehydrogenase [ec:1.1.1.8]	R50		'GLY3P[c] + NAD[c] --> DHAP[c] + NADH[c]'	Glycerol-3-phosphate dehydrogenase [ec:1.1.1.8]	R50		'GLY3P[c] + NAD[c] --> DHAP[c] + NADH[c]'	Glycerol-3-phosphate dehydrogenase [ec:1.1.1.8]	R50		'GLY3P[c] + NAD[c] --> DHAP[c] + NADH[c]'	Glycerol-3-phosphate dehydrogenase [ec:1.1.1.8]
R51		'DHAP[c] <--> G3P[c]'	Triose-phosphate isomerase [ec:5.3.1.1]	R51		'DHAP[c] <--> G3P[c]'	Triose-phosphate isomerase [ec:5.3.1.1]	R51		'DHAP[c] <--> G3P[c]'	Triose-phosphate isomerase [ec:5.3.1.1]	R51		'DHAP[c] <--> G3P[c]'	Triose-phosphate isomerase [ec:5.3.1.1]	R51		'DHAP[c] <--> G3P[c]'	Triose-phosphate isomerase [ec:5.3.1.1]
R52		'G3P[c] + NAD[c] + Pi[c] <--> BPG[c] + NADH[c]'	Glyceraldehyde 3-phosphate dehydrogenase [ec:1.2.1.12]	R52		'G3P[c] + NAD[c] + Pi[c] <--> BPG[c] + NADH[c]'	Glyceraldehyde 3-phosphate dehydrogenase [ec:1.2.1.12]	R52		'G3P[c] + NAD[c] + Pi[c] <--> BPG[c] + NADH[c]'	Glyceraldehyde 3-phosphate dehydrogenase [ec:1.2.1.12]	R52		'G3P[c] + NAD[c] + Pi[c] <--> BPG[c] + NADH[c]'	Glyceraldehyde 3-phosphate dehydrogenase [ec:1.2.1.12]	R52		'G3P[c] + NAD[c] + Pi[c] <--> BPG[c] + NADH[c]'	Glyceraldehyde 3-phosphate dehydrogenase [ec:1.2.1.12]
R53		'BPG[c] + ADP[c] <--> 3-PG[c] + ATP[c]'	Phosphoglycerate kinase [ec:2.7.2.3]	R53		'BPG[c] + ADP[c] <--> 3-PG[c] + ATP[c]'	Phosphoglycerate kinase [ec:2.7.2.3]	R53		'BPG[c] + ADP[c] <--> 3-PG[c] + ATP[c]'	Phosphoglycerate kinase [ec:2.7.2.3]	R53		'BPG[c] + ADP[c] <--> 3-PG[c] + ATP[c]'	Phosphoglycerate kinase [ec:2.7.2.3]	R53		'BPG[c] + ADP[c] <--> 3-PG[c] + ATP[c]'	Phosphoglycerate kinase [ec:2.7.2.3]
R54		'3-PG[c] <--> 2-PG[c]'	Phosphoglycerate mutase [ec:5.4.2.1]	R54		'3-PG[c] <--> 2-PG[c]'	Phosphoglycerate mutase [ec:5.4.2.1]	R54		'3-PG[c] <--> 2-PG[c]'	Phosphoglycerate mutase [ec:5.4.2.1]	R54		'3-PG[c] <--> 2-PG[c]'	Phosphoglycerate mutase [ec:5.4.2.1]	R54		'3-PG[c] <--> 2-PG[c]'	Phosphoglycerate mutase [ec:5.4.2.1]
R55		'2-PG[c] <--> PEP[c]'	Phosphopyruvate hydratase [ec:4.2.1.11]	R55		'2-PG[c] <--> PEP[c]'	Phosphopyruvate hydratase [ec:4.2.1.11]	R55		'2-PG[c] <--> PEP[c]'	Phosphopyruvate hydratase [ec:4.2.1.11]	R55		'2-PG[c] <--> PEP[c]'	Phosphopyruvate hydratase [ec:4.2.1.11]	R55		'2-PG[c] <--> PEP[c]'	Phosphopyruvate hydratase [ec:4.2.1.11]
R56		'PEP[c] + ADP[c] --> PYR[c] + ATP[c]'	Pyruvate kinase [ec:2.7.1.40]	R56		'PEP[c] + ADP[c] --> PYR[c] + ATP[c]'	Pyruvate kinase [ec:2.7.1.40]	R56		'PEP[c] + ADP[c] --> PYR[c] + ATP[c]'	Pyruvate kinase [ec:2.7.1.40]	R56		'PEP[c] + ADP[c] --> PYR[c] + ATP[c]'	Pyruvate kinase [ec:2.7.1.40]	R56		'PEP[c] + ADP[c] --> PYR[c] + ATP[c]'	Pyruvate kinase [ec:2.7.1.40]
R57		'PYR[c] + ATP[c] --> PEP[c] + AMP[c] + Pi[c]'	Phosphoenolpyruvate synthase [ec:2.7.9.2]	R57		'PYR[c] + ATP[c] --> PEP[c] + AMP[c] + Pi[c]'	Phosphoenolpyruvate synthase [ec:2.7.9.2]	R57		'PYR[c] + ATP[c] --> PEP[c] + AMP[c] + Pi[c]'	Phosphoenolpyruvate synthase [ec:2.7.9.2]	R57		'PYR[c] + ATP[c] --> PEP[c] + AMP[c] + Pi[c]'	Phosphoenolpyruvate synthase [ec:2.7.9.2]	R57		'PYR[c] + ATP[c] --> PEP[c] + AMP[c] + Pi[c]'	Phosphoenolpyruvate synthase [ec:2.7.9.2]
R58		'PYR[c] + NAD[c] + H-CoA[c] --> AC-CoA[c] + NADH[c] + CO2[c]'	Pyruvate dehydrogenase complex [ec:1.2.4.1&ec:2.3.1.12&ec:1.8.1.4]	R58		'PYR[c] + NAD[c] + H-CoA[c] --> AC-CoA[c] + NADH[c] + CO2[c]'	Pyruvate dehydrogenase complex [ec:1.2.4.1&ec:2.3.1.12&ec:1.8.1.4]	R58		'PYR[c] + NAD[c] + H-CoA[c] --> AC-CoA[c] + NADH[c] + CO2[c]'	Pyruvate dehydrogenase complex [ec:1.2.4.1&ec:2.3.1.12&ec:1.8.1.4]	R58		'PYR[c] + NAD[c] + H-CoA[c] --> AC-CoA[c] + NADH[c] + CO2[c]'	Pyruvate dehydrogenase complex [ec:1.2.4.1&ec:2.3.1.12&ec:1.8.1.4]	R58		'PYR[c] + NAD[c] + H-CoA[c] --> AC-CoA[c] + NADH[c] + CO2[c]'	Pyruvate dehydrogenase complex [ec:1.2.4.1&ec:2.3.1.12&ec:1.8.1.4]
R59		'PEP[c] + CO2[c] --> OXA[c] + Pi[c]'	Phosphoenolpyruvate carboxylase [ec:4.1.1.31]	R59		'PEP[c] + CO2[c] --> OXA[c] + Pi[c]'	Phosphoenolpyruvate carboxylase [ec:4.1.1.31]	R59		'PEP[c] + CO2[c] --> OXA[c] + Pi[c]'	Phosphoenolpyruvate carboxylase [ec:4.1.1.31]	R59		'PEP[c] + CO2[c] --> OXA[c] + Pi[c]'	Phosphoenolpyruvate carboxylase [ec:4.1.1.31]	R59		'PEP[c] + CO2[c] --> OXA[c] + Pi[c]'	Phosphoenolpyruvate carboxylase [ec:4.1.1.31]
R60		'PYR[c] + ATP[c] + CO2[c] <--> OXA[c] + ADP[c] + Pi[c]'	Pyruvate carboxylase [ec:6.4.1.1]	R60		'PYR[c] + ATP[c] + CO2[c] <--> OXA[c] + ADP[c] + Pi[c]'	Pyruvate carboxylase [ec:6.4.1.1]	R60		'PYR[c] + ATP[c] + CO2[c] <--> OXA[c] + ADP[c] + Pi[c]'	Pyruvate carboxylase [ec:6.4.1.1]	R60		'PYR[c] + ATP[c] + CO2[c] <--> OXA[c] + ADP[c] + Pi[c]'	Pyruvate carboxylase [ec:6.4.1.1]	R60		'PYR[c] + ATP[c] + CO2[c] <--> OXA[c] + ADP[c] + Pi[c]'	Pyruvate carboxylase [ec:6.4.1.1]
R61		'OXA[c] + ATP[c] --> PEP[c] + ADP[c] + CO2[c]'	Phosphoenolpyruvate carboxykinase [ec:4.1.1.49]	R61		'OXA[c] + ATP[c] --> PEP[c] + ADP[c] + CO2[c]'	Phosphoenolpyruvate carboxykinase [ec:4.1.1.49]	R61		'OXA[c] + ATP[c] --> PEP[c] + ADP[c] + CO2[c]'	Phosphoenolpyruvate carboxykinase [ec:4.1.1.49]	R61		'OXA[c] + ATP[c] --> PEP[c] + ADP[c] + CO2[c]'	Phosphoenolpyruvate carboxykinase [ec:4.1.1.49]	R61		'OXA[c] + ATP[c] --> PEP[c] + ADP[c] + CO2[c]'	Phosphoenolpyruvate carboxykinase [ec:4.1.1.49]
R62		'OXA[c] + AC-CoA[c] --> CIT[c] + H-CoA[c]'	Citrate synthase [ec:2.3.3.1]	R62		'OXA[c] + AC-CoA[c] --> CIT[c] + H-CoA[c]'	Citrate synthase [ec:2.3.3.1]	R62		'OXA[c] + AC-CoA[c] --> CIT[c] + H-CoA[c]'	Citrate synthase [ec:2.3.3.1]	R62		'OXA[c] + AC-CoA[c] --> CIT[c] + H-CoA[c]'	Citrate synthase [ec:2.3.3.1]	R62		'OXA[c] + AC-CoA[c] --> CIT[c] + H-CoA[c]'	Citrate synthase [ec:2.3.3.1]
R63		'CIT[c] <--> ISC[c]'	Aconitase [ec:4.2.1.3]	R63		'CIT[c] <--> ISC[c]'	Aconitase [ec:4.2.1.3]	R63		'CIT[c] <--> ISC[c]'	Aconitase [ec:4.2.1.3]	R63		'CIT[c] <--> ISC[c]'	Aconitase [ec:4.2.1.3]	R63		'CIT[c] <--> ISC[c]'	Aconitase [ec:4.2.1.3]
R64		'ISC[c] + NAD[c] --> aKG[c] + NADH[c] + CO2[c]'	Isocitrate dehydrogenase (NAD dependent) [ec:1.1.1.41]	R64		'ISC[c] + NAD[c] --> aKG[c] + NADH[c] + CO2[c]'	Isocitrate dehydrogenase (NAD dependent) [ec:1.1.1.41]	R64		'ISC[c] + NAD[c] --> aKG[c] + NADH[c] + CO2[c]'	Isocitrate dehydrogenase (NAD dependent) [ec:1.1.1.41]	R64		'ISC[c] + NAD[c] --> aKG[c] + NADH[c] + CO2[c]'	Isocitrate dehydrogenase (NAD dependent) [ec:1.1.1.41]	R64		'ISC[c] + NAD[c] --> aKG[c] + NADH[c] + CO2[c]'	Isocitrate dehydrogenase (NAD dependent) [ec:1.1.1.41]
R65		'aKG[c] + H-CoA[c] + NAD[c] --> SUC-CoA[c] + CO2[c] + NADH[c]'	α-ketoglutarate dehydrogenase [ec:1.2.4.2&2.3.1.61]	R65		'aKG[c] + H-CoA[c] + NAD[c] --> SUC-CoA[c] + CO2[c] + NADH[c]'	α-ketoglutarate dehydrogenase [ec:1.2.4.2&2.3.1.61]	R65		'aKG[c] + H-CoA[c] + NAD[c] --> SUC-CoA[c] + CO2[c] + NADH[c]'	α-ketoglutarate dehydrogenase [ec:1.2.4.2&2.3.1.61]	R65		'aKG[c] + H-CoA[c] + NAD[c] --> SUC-CoA[c] + CO2[c] + NADH[c]'	α-ketoglutarate dehydrogenase [ec:1.2.4.2&2.3.1.61]	R65		'aKG[c] + H-CoA[c] + NAD[c] --> SUC-CoA[c] + CO2[c] + NADH[c]'	α-ketoglutarate dehydrogenase [ec:1.2.4.2&2.3.1.61]
R66		'SUC-CoA[c] + ADP[c] + Pi[c] <--> SUC[c] + H-CoA[c] + ATP[c]'	Succinyl-CoA synthetase [ec:6.2.1.5]	R66		'SUC-CoA[c] + ADP[c] + Pi[c] <--> SUC[c] + H-CoA[c] + ATP[c]'	Succinyl-CoA synthetase [ec:6.2.1.5]	R66		'SUC-CoA[c] + ADP[c] + Pi[c] <--> SUC[c] + H-CoA[c] + ATP[c]'	Succinyl-CoA synthetase [ec:6.2.1.5]	R66		'SUC-CoA[c] + ADP[c] + Pi[c] <--> SUC[c] + H-CoA[c] + ATP[c]'	Succinyl-CoA synthetase [ec:6.2.1.5]	R66		'SUC-CoA[c] + ADP[c] + Pi[c] <--> SUC[c] + H-CoA[c] + ATP[c]'	Succinyl-CoA synthetase [ec:6.2.1.5]
R67		'SUC[c] + FAD[c] <--> FUM[c] + FADH2[c]'	Fumarate reductase [ec:1.3.5.4]	R67		'SUC[c] + FAD[c] <--> FUM[c] + FADH2[c]'	Fumarate reductase [ec:1.3.5.4]	R67		'SUC[c] + FAD[c] <--> FUM[c] + FADH2[c]'	Fumarate reductase [ec:1.3.5.4]	R67		'SUC[c] + FAD[c] <--> FUM[c] + FADH2[c]'	Fumarate reductase [ec:1.3.5.4]	R67		'SUC[c] + FAD[c] <--> FUM[c] + FADH2[c]'	Fumarate reductase [ec:1.3.5.4]
R68		'SUC[c] + UQ[c] --> FUM[c] + UQH2[c]'	Succinate dehydrogenase [ec:1.3.5.1]	R68		'SUC[c] + UQ[c] --> FUM[c] + UQH2[c]'	Succinate dehydrogenase [ec:1.3.5.1]	R68		'SUC[c] + UQ[c] --> FUM[c] + UQH2[c]'	Succinate dehydrogenase [ec:1.3.5.1]	R68		'SUC[c] + UQ[c] --> FUM[c] + UQH2[c]'	Succinate dehydrogenase [ec:1.3.5.1]	R68		'SUC[c] + UQ[c] --> FUM[c] + UQH2[c]'	Succinate dehydrogenase [ec:1.3.5.1]
R69		'FUM[c] <--> MAL[c]'	Fumarase [ec:4.2.1.2]	R69		'FUM[c] <--> MAL[c]'	Fumarase [ec:4.2.1.2]	R69		'FUM[c] <--> MAL[c]'	Fumarase [ec:4.2.1.2]	R69		'FUM[c] <--> MAL[c]'	Fumarase [ec:4.2.1.2]	R69		'FUM[c] <--> MAL[c]'	Fumarase [ec:4.2.1.2]
R70		'MAL[c] + NAD[c] <--> OXA[c] + NADH[c]'	Malate dehydrogenase [ec:1.1.1.37]	R70		'MAL[c] + NAD[c] <--> OXA[c] + NADH[c]'	Malate dehydrogenase [ec:1.1.1.37]	R70		'MAL[c] + NAD[c] <--> OXA[c] + NADH[c]'	Malate dehydrogenase [ec:1.1.1.37]	R70		'MAL[c] + NAD[c] <--> OXA[c] + NADH[c]'	Malate dehydrogenase [ec:1.1.1.37]	R70		'MAL[c] + NAD[c] <--> OXA[c] + NADH[c]'	Malate dehydrogenase [ec:1.1.1.37]
R71		'MAL[c] + NADP[c] --> PYR[c] + CO2[c] + NADPH[c]'	Malic enzyme (NADP dependent) [ec:1.1.1.40]	R71		'MAL[c] + NADP[c] --> PYR[c] + CO2[c] + NADPH[c]'	Malic enzyme (NADP dependent) [ec:1.1.1.40]	R71		'MAL[c] + NADP[c] --> PYR[c] + CO2[c] + NADPH[c]'	Malic enzyme (NADP dependent) [ec:1.1.1.40]	R71		'MAL[c] + NADP[c] --> PYR[c] + CO2[c] + NADPH[c]'	Malic enzyme (NADP dependent) [ec:1.1.1.40]	R71		'MAL[c] + NADP[c] --> PYR[c] + CO2[c] + NADPH[c]'	Malic enzyme (NADP dependent) [ec:1.1.1.40]
R72		'ISC[c] --> GLYOX[c] + SUC[c]'	Isocitrate lyase [ec:4.1.3.1]	R72		'ISC[c] --> GLYOX[c] + SUC[c]'	Isocitrate lyase [ec:4.1.3.1]	R72		'ISC[c] --> GLYOX[c] + SUC[c]'	Isocitrate lyase [ec:4.1.3.1]	R72		'ISC[c] --> GLYOX[c] + SUC[c]'	Isocitrate lyase [ec:4.1.3.1]	R72		'ISC[c] --> GLYOX[c] + SUC[c]'	Isocitrate lyase [ec:4.1.3.1]
R73		'GLYOX[c] + AC-CoA[c] --> MAL[c] + H-CoA[c]'	Malate synthase [ec:2.3.3.9]	R73		'GLYOX[c] + AC-CoA[c] --> MAL[c] + H-CoA[c]'	Malate synthase [ec:2.3.3.9]	R73		'GLYOX[c] + AC-CoA[c] --> MAL[c] + H-CoA[c]'	Malate synthase [ec:2.3.3.9]	R73		'GLYOX[c] + AC-CoA[c] --> MAL[c] + H-CoA[c]'	Malate synthase [ec:2.3.3.9]	R73		'GLYOX[c] + AC-CoA[c] --> MAL[c] + H-CoA[c]'	Malate synthase [ec:2.3.3.9]
R74		'AC[c] + H-CoA[c] + ATP[c] --> AC-CoA[c] + AMP[c] + 2 Pi[c]'	Acetyl-CoA synthetase [ec:6.2.1.1]	R74		'AC[c] + H-CoA[c] + ATP[c] --> AC-CoA[c] + AMP[c] + 2 Pi[c]'	Acetyl-CoA synthetase [ec:6.2.1.1]	R74		'AC[c] + H-CoA[c] + ATP[c] --> AC-CoA[c] + AMP[c] + 2 Pi[c]'	Acetyl-CoA synthetase [ec:6.2.1.1]	R74		'AC[c] + H-CoA[c] + ATP[c] --> AC-CoA[c] + AMP[c] + 2 Pi[c]'	Acetyl-CoA synthetase [ec:6.2.1.1]	R74		'AC[c] + H-CoA[c] + ATP[c] --> AC-CoA[c] + AMP[c] + 2 Pi[c]'	Acetyl-CoA synthetase [ec:6.2.1.1]
R75		'2 AC-CoA[c] <--> ACAC-CoA[c] + H-CoA[c]'	Acetoacetyl-CoA thiolase [ec:2.3.1.9]	R75		'2 AC-CoA[c] <--> ACAC-CoA[c] + H-CoA[c]'	Acetoacetyl-CoA thiolase [ec:2.3.1.9]	R75		'2 AC-CoA[c] <--> ACAC-CoA[c] + H-CoA[c]'	Acetoacetyl-CoA thiolase [ec:2.3.1.9]	R75		'2 AC-CoA[c] <--> ACAC-CoA[c] + H-CoA[c]'	Acetoacetyl-CoA thiolase [ec:2.3.1.9]	R75		'2 AC-CoA[c] <--> ACAC-CoA[c] + H-CoA[c]'	Acetoacetyl-CoA thiolase [ec:2.3.1.9]
R76		'AC-CoA[c] + SUC[c] --> AC[c] + SUC-CoA[c]'	Succinyl-CoA:acetate CoA-transferase [ec:2.8.3.18]	R76		'AC-CoA[c] + SUC[c] --> AC[c] + SUC-CoA[c]'	Succinyl-CoA:acetate CoA-transferase [ec:2.8.3.18]	R76		'AC-CoA[c] + SUC[c] --> AC[c] + SUC-CoA[c]'	Succinyl-CoA:acetate CoA-transferase [ec:2.8.3.18]	R76		'AC-CoA[c] + SUC[c] --> AC[c] + SUC-CoA[c]'	Succinyl-CoA:acetate CoA-transferase [ec:2.8.3.18]	R76		'AC-CoA[c] + SUC[c] --> AC[c] + SUC-CoA[c]'	Succinyl-CoA:acetate CoA-transferase [ec:2.8.3.18]
R77		'ACAC[c] + SUC-CoA[c] <--> ACAC-CoA[c] + SUC[c]'	3-Oxoacid CoA-transferase [ec:2.8.3.5]	R77		'ACAC[c] + SUC-CoA[c] <--> ACAC-CoA[c] + SUC[c]'	3-Oxoacid CoA-transferase [ec:2.8.3.5]	R77		'ACAC[c] + SUC-CoA[c] <--> ACAC-CoA[c] + SUC[c]'	3-Oxoacid CoA-transferase [ec:2.8.3.5]	R77		'ACAC[c] + SUC-CoA[c] <--> ACAC-CoA[c] + SUC[c]'	3-Oxoacid CoA-transferase [ec:2.8.3.5]	R77		'ACAC[c] + SUC-CoA[c] <--> ACAC-CoA[c] + SUC[c]'	3-Oxoacid CoA-transferase [ec:2.8.3.5]
R78		'PYR[c] + H-CoA[c] --> AC-CoA[c] + FOR[c]'	Pyruvate formate lyase [ec:2.3.1.54]	R78		'PYR[c] + H-CoA[c] --> AC-CoA[c] + FOR[c]'	Pyruvate formate lyase [ec:2.3.1.54]	R78		'PYR[c] + H-CoA[c] --> AC-CoA[c] + FOR[c]'	Pyruvate formate lyase [ec:2.3.1.54]	R78		'PYR[c] + H-CoA[c] --> AC-CoA[c] + FOR[c]'	Pyruvate formate lyase [ec:2.3.1.54]	R78		'PYR[c] + H-CoA[c] --> AC-CoA[c] + FOR[c]'	Pyruvate formate lyase [ec:2.3.1.54]
R79		'FOR[c] + NAD[c] --> CO2[c] + NADH[c]'	Formate dehydrogenase [ec:1.17.1.9]	R79		'FOR[c] + NAD[c] --> CO2[c] + NADH[c]'	Formate dehydrogenase [ec:1.17.1.9]	R79		'FOR[c] + NAD[c] --> CO2[c] + NADH[c]'	Formate dehydrogenase [ec:1.17.1.9]	R79		'FOR[c] + NAD[c] --> CO2[c] + NADH[c]'	Formate dehydrogenase [ec:1.17.1.9]	R79		'FOR[c] + NAD[c] --> CO2[c] + NADH[c]'	Formate dehydrogenase [ec:1.17.1.9]
R80		'H-CoA[c] + ACP[c] --> AC-CoA[c] + Pi[c]'	Phosphate acetyltransferase [ec:2.3.1.8]	R80		'H-CoA[c] + ACP[c] --> AC-CoA[c] + Pi[c]'	Phosphate acetyltransferase [ec:2.3.1.8]	R80		'H-CoA[c] + ACP[c] --> AC-CoA[c] + Pi[c]'	Phosphate acetyltransferase [ec:2.3.1.8]	R80		'H-CoA[c] + ACP[c] --> AC-CoA[c] + Pi[c]'	Phosphate acetyltransferase [ec:2.3.1.8]	R80		'H-CoA[c] + ACP[c] --> AC-CoA[c] + Pi[c]'	Phosphate acetyltransferase [ec:2.3.1.8]
R81		'ACP[c] + ADP[c] --> AC[c] + ATP[c]'	Acetate kinase [ec:2.7.2.1]	R81		'ACP[c] + ADP[c] --> AC[c] + ATP[c]'	Acetate kinase [ec:2.7.2.1]	R81		'ACP[c] + ADP[c] --> AC[c] + ATP[c]'	Acetate kinase [ec:2.7.2.1]	R81		'ACP[c] + ADP[c] --> AC[c] + ATP[c]'	Acetate kinase [ec:2.7.2.1]	R81		'ACP[c] + ADP[c] --> AC[c] + ATP[c]'	Acetate kinase [ec:2.7.2.1]
R82		'AC-CoA[c] + NADH[c] <--> ACA[c] + NAD[c] + H-CoA[c]'	Acetaldehyde dehydrogenase [ec:1.2.1.10]	R82		'AC-CoA[c] + NADH[c] <--> ACA[c] + NAD[c] + H-CoA[c]'	Acetaldehyde dehydrogenase [ec:1.2.1.10]	R82		'AC-CoA[c] + NADH[c] <--> ACA[c] + NAD[c] + H-CoA[c]'	Acetaldehyde dehydrogenase [ec:1.2.1.10]	R82		'AC-CoA[c] + NADH[c] <--> ACA[c] + NAD[c] + H-CoA[c]'	Acetaldehyde dehydrogenase [ec:1.2.1.10]	R82		'AC-CoA[c] + NADH[c] <--> ACA[c] + NAD[c] + H-CoA[c]'	Acetaldehyde dehydrogenase [ec:1.2.1.10]
R83		'ACA[c] + NAD[c] --> AC[c] + NADH[c]'	Aldehyde dehydrogenase (NAD dependent) [ec:1.2.1.3]	R83		'ACA[c] + NAD[c] --> AC[c] + NADH[c]'	Aldehyde dehydrogenase (NAD dependent) [ec:1.2.1.3]	R83		'ACA[c] + NAD[c] --> AC[c] + NADH[c]'	Aldehyde dehydrogenase (NAD dependent) [ec:1.2.1.3]	R83		'ACA[c] + NAD[c] --> AC[c] + NADH[c]'	Aldehyde dehydrogenase (NAD dependent) [ec:1.2.1.3]	R83		'ACA[c] + NAD[c] --> AC[c] + NADH[c]'	Aldehyde dehydrogenase (NAD dependent) [ec:1.2.1.3]
R84		'ACA[c] + NADH[c] --> ETOH[c] + NAD[c]'	Alcohol dehydrogenase [ec:1.1.1.1]	R84		'ACA[c] + NADH[c] --> ETOH[c] + NAD[c]'	Alcohol dehydrogenase [ec:1.1.1.1]	R84		'ACA[c] + NADH[c] --> ETOH[c] + NAD[c]'	Alcohol dehydrogenase [ec:1.1.1.1]	R84		'ACA[c] + NADH[c] --> ETOH[c] + NAD[c]'	Alcohol dehydrogenase [ec:1.1.1.1]	R84		'ACA[c] + NADH[c] --> ETOH[c] + NAD[c]'	Alcohol dehydrogenase [ec:1.1.1.1]
R85		'PYR[c] + NADH[c] --> LAC[c] + NAD[c]'	Lactate dehydrogenase [ec:1.1.1.27]	R85		'PYR[c] + NADH[c] --> LAC[c] + NAD[c]'	Lactate dehydrogenase [ec:1.1.1.27]	R85		'PYR[c] + NADH[c] --> LAC[c] + NAD[c]'	Lactate dehydrogenase [ec:1.1.1.27]	R85		'PYR[c] + NADH[c] --> LAC[c] + NAD[c]'	Lactate dehydrogenase [ec:1.1.1.27]	R85		'PYR[c] + NADH[c] --> LAC[c] + NAD[c]'	Lactate dehydrogenase [ec:1.1.1.27]
R86		'ACAC[c] --> ACETONE[c] + CO2[c]'	Acetoacetate decarboxylase [ec:4.1.1.4]	R86		'ACAC[c] --> ACETONE[c] + CO2[c]'	Acetoacetate decarboxylase [ec:4.1.1.4]	R86		'ACAC[c] --> ACETONE[c] + CO2[c]'	Acetoacetate decarboxylase [ec:4.1.1.4]	R86		'ACAC[c] --> ACETONE[c] + CO2[c]'	Acetoacetate decarboxylase [ec:4.1.1.4]	R86		'ACAC[c] --> ACETONE[c] + CO2[c]'	Acetoacetate decarboxylase [ec:4.1.1.4]
R87		'ACAC-CoA[c] + NADPH[c] <--> 3-HBut-CoA[c] + NADP[c]'	3-Hydroxyacyl-CoA dehydrogenase [ec:1.1.1.35]	R87		'ACAC-CoA[c] + NADPH[c] <--> 3-HBut-CoA[c] + NADP[c]'	3-Hydroxyacyl-CoA dehydrogenase [ec:1.1.1.35]	R87		'ACAC-CoA[c] + NADPH[c] <--> 3-HBut-CoA[c] + NADP[c]'	3-Hydroxyacyl-CoA dehydrogenase [ec:1.1.1.35]	R87		'ACAC-CoA[c] + NADPH[c] <--> 3-HBut-CoA[c] + NADP[c]'	3-Hydroxyacyl-CoA dehydrogenase [ec:1.1.1.35]	R87		'ACAC-CoA[c] + NADPH[c] <--> 3-HBut-CoA[c] + NADP[c]'	3-Hydroxyacyl-CoA dehydrogenase [ec:1.1.1.35]
R88		'3-HBut-CoA[c] --> PHB[c] + H-CoA[c]'	Poly(3-hydroxybutyrate) synthase [ec:2.3.1.-]	R88		'3-HBut-CoA[c] --> PHB[c] + H-CoA[c]'	Poly(3-hydroxybutyrate) synthase [ec:2.3.1.-]	R88		'3-HBut-CoA[c] --> PHB[c] + H-CoA[c]'	Poly(3-hydroxybutyrate) synthase [ec:2.3.1.-]	R88		'3-HBut-CoA[c] --> PHB[c] + H-CoA[c]'	Poly(3-hydroxybutyrate) synthase [ec:2.3.1.-]	R88		'3-HBut-CoA[c] --> PHB[c] + H-CoA[c]'	Poly(3-hydroxybutyrate) synthase [ec:2.3.1.-]
R89		'PHB[c] + NAD[c] --> ACAC[c] + NADH[c]'	PHA depolymerase [ec:3.1.1.75]	R89		'PHB[c] + NAD[c] --> ACAC[c] + NADH[c]'	PHA depolymerase [ec:3.1.1.75]	R89		'PHB[c] + NAD[c] --> ACAC[c] + NADH[c]'	PHA depolymerase [ec:3.1.1.75]	R89		'PHB[c] + NAD[c] --> ACAC[c] + NADH[c]'	PHA depolymerase [ec:3.1.1.75]	R89		'PHB[c] + NAD[c] --> ACAC[c] + NADH[c]'	PHA depolymerase [ec:3.1.1.75]
R90		'aKG[c] + NADPH[c] + NH3[c] <--> GLU[c] + NADP[c]'	Glutamate dehydrogenase [ec:1.4.1.2]	R90		'aKG[c] + NADPH[c] + NH3[c] <--> GLU[c] + NADP[c]'	Glutamate dehydrogenase [ec:1.4.1.2]	R90		'aKG[c] + NADPH[c] + NH3[c] <--> GLU[c] + NADP[c]'	Glutamate dehydrogenase [ec:1.4.1.2]	R90		'aKG[c] + NADPH[c] + NH3[c] <--> GLU[c] + NADP[c]'	Glutamate dehydrogenase [ec:1.4.1.2]	R90		'aKG[c] + NADPH[c] + NH3[c] <--> GLU[c] + NADP[c]'	Glutamate dehydrogenase [ec:1.4.1.2]
R91		'GLU[c] + NH3[c] + ATP[c] <--> GLN[c] + ADP[c] + Pi[c]'	Glutamine synthase [ec:6.3.1.2]	R91		'GLU[c] + NH3[c] + ATP[c] <--> GLN[c] + ADP[c] + Pi[c]'	Glutamine synthase [ec:6.3.1.2]	R91		'GLU[c] + NH3[c] + ATP[c] <--> GLN[c] + ADP[c] + Pi[c]'	Glutamine synthase [ec:6.3.1.2]	R91		'GLU[c] + NH3[c] + ATP[c] <--> GLN[c] + ADP[c] + Pi[c]'	Glutamine synthase [ec:6.3.1.2]	R91		'GLU[c] + NH3[c] + ATP[c] <--> GLN[c] + ADP[c] + Pi[c]'	Glutamine synthase [ec:6.3.1.2]
R92		'0.021 G6P[c] + 0.007 F6P[c] + 0.09 R5P[c] + 0.036 E4P[c] + 0.013 G3P[c] + 0.15 3-PG[c] + 0.052 PEP[c] + 0.283 PYR[c] + 0.374 AC-CoA[c] + 0.179 OXA[c] + 0.832 GLU[c] + 0.025 GLN[c] + 4.11 ATP[c] + 0.826 NADPH[c] + 0.312 NAD[c] --> BIOMASS[c] + 0.751 aKG[c] + 0.261 CO2[c] + 0.374 H-CoA[c] + 4.11 ADP[c] + 4.479 Pi[c] + 0.826 NADP[c] + 0.312 NADH[c]'	Biomass formation	R92		'0.021 G6P[c] + 0.007 F6P[c] + 0.09 R5P[c] + 0.036 E4P[c] + 0.013 G3P[c] + 0.15 3-PG[c] + 0.052 PEP[c] + 0.283 PYR[c] + 0.374 AC-CoA[c] + 0.179 OXA[c] + 0.832 GLU[c] + 0.025 GLN[c] + 4.11 ATP[c] + 0.826 NADPH[c] + 0.312 NAD[c] --> BIOMASS[c] + 0.751 aKG[c] + 0.261 CO2[c] + 0.374 H-CoA[c] + 4.11 ADP[c] + 4.479 Pi[c] + 0.826 NADP[c] + 0.312 NADH[c]'	Biomass formation	R92		'0.021 G6P[c] + 0.007 F6P[c] + 0.09 R5P[c] + 0.036 E4P[c] + 0.013 G3P[c] + 0.15 3-PG[c] + 0.052 PEP[c] + 0.283 PYR[c] + 0.374 AC-CoA[c] + 0.179 OXA[c] + 0.832 GLU[c] + 0.025 GLN[c] + 4.11 ATP[c] + 0.826 NADPH[c] + 0.312 NAD[c] --> BIOMASS[c] + 0.751 aKG[c] + 0.261 CO2[c] + 0.374 H-CoA[c] + 4.11 ADP[c] + 4.479 Pi[c] + 0.826 NADP[c] + 0.312 NADH[c]'	Biomass formation	R92		'0.021 G6P[c] + 0.007 F6P[c] + 0.09 R5P[c] + 0.036 E4P[c] + 0.013 G3P[c] + 0.15 3-PG[c] + 0.052 PEP[c] + 0.283 PYR[c] + 0.374 AC-CoA[c] + 0.179 OXA[c] + 0.832 GLU[c] + 0.025 GLN[c] + 4.11 ATP[c] + 0.826 NADPH[c] + 0.312 NAD[c] --> BIOMASS[c] + 0.751 aKG[c] + 0.261 CO2[c] + 0.374 H-CoA[c] + 4.11 ADP[c] + 4.479 Pi[c] + 0.826 NADP[c] + 0.312 NADH[c]'	Biomass formation	R92		'0.021 G6P[c] + 0.007 F6P[c] + 0.09 R5P[c] + 0.036 E4P[c] + 0.013 G3P[c] + 0.15 3-PG[c] + 0.052 PEP[c] + 0.283 PYR[c] + 0.374 AC-CoA[c] + 0.179 OXA[c] + 0.832 GLU[c] + 0.025 GLN[c] + 4.11 ATP[c] + 0.826 NADPH[c] + 0.312 NAD[c] --> BIOMASS[c] + 0.751 aKG[c] + 0.261 CO2[c] + 0.374 H-CoA[c] + 4.11 ADP[c] + 4.479 Pi[c] + 0.826 NADP[c] + 0.312 NADH[c]'	Biomass formation
R93		'NADH[c] + FAD[c] --> NAD[c] + FADH2[c]'	Flavin reductase (NAD dependent) [ec:1.5.1.36]	R93		'NADH[c] + FAD[c] --> NAD[c] + FADH2[c]'	Flavin reductase (NAD dependent) [ec:1.5.1.36]	R93		'NADH[c] + FAD[c] --> NAD[c] + FADH2[c]'	Flavin reductase (NAD dependent) [ec:1.5.1.36]	R93		'NADH[c] + FAD[c] --> NAD[c] + FADH2[c]'	Flavin reductase (NAD dependent) [ec:1.5.1.36]	R93		'NADH[c] + FAD[c] --> NAD[c] + FADH2[c]'	Flavin reductase (NAD dependent) [ec:1.5.1.36]
R94		'NADPH[c] + NAD[c] --> NADP[c] + NADH[c]'	NAD(P) transhydrogenase [ec:1.6.1.3]	R94		'NADPH[c] + NAD[c] --> NADP[c] + NADH[c]'	NAD(P) transhydrogenase [ec:1.6.1.3]	R94		'NADPH[c] + NAD[c] --> NADP[c] + NADH[c]'	NAD(P) transhydrogenase [ec:1.6.1.3]	R94		'NADPH[c] + NAD[c] --> NADP[c] + NADH[c]'	NAD(P) transhydrogenase [ec:1.6.1.3]	R94		'NADPH[c] + NAD[c] --> NADP[c] + NADH[c]'	NAD(P) transhydrogenase [ec:1.6.1.3]
R95		'NADH[c] + NADP[c] + H[e] --> NAD[c] + NADPH[c] + H[c]'	NAD(P) transhydrogenase (Re/Si-specific) [ec:1.6.1.2]	R95		'NADH[c] + NADP[c] + H[e] --> NAD[c] + NADPH[c] + H[c]'	NAD(P) transhydrogenase (Re/Si-specific) [ec:1.6.1.2]	R95		'NADH[c] + NADP[c] + H[e] --> NAD[c] + NADPH[c] + H[c]'	NAD(P) transhydrogenase (Re/Si-specific) [ec:1.6.1.2]	R95		'NADH[c] + NADP[c] + H[e] --> NAD[c] + NADPH[c] + H[c]'	NAD(P) transhydrogenase (Re/Si-specific) [ec:1.6.1.2]	R95		'NADH[c] + NADP[c] + H[e] --> NAD[c] + NADPH[c] + H[c]'	NAD(P) transhydrogenase (Re/Si-specific) [ec:1.6.1.2]
R96		'H2[c] + NAD[c] --> NADH[c]'	Hydrogen dehydrogenase [ec:1.12.1.2]	R96		'H2[c] + NAD[c] --> NADH[c]'	Hydrogen dehydrogenase [ec:1.12.1.2]	R96		'H2[c] + NAD[c] --> NADH[c]'	Hydrogen dehydrogenase [ec:1.12.1.2]	R96		'H2[c] + NAD[c] --> NADH[c]'	Hydrogen dehydrogenase [ec:1.12.1.2]	R96		'H2[c] + NAD[c] --> NADH[c]'	Hydrogen dehydrogenase [ec:1.12.1.2]
R97		'UQ[c] + H2[c] --> UQH2[c]'	Hydrogen dehydrogenase [ec:1.12.99.6]	R97		'UQ[c] + H2[c] --> UQH2[c]'	Hydrogen dehydrogenase [ec:1.12.99.6]	R97		'UQ[c] + H2[c] --> UQH2[c]'	Hydrogen dehydrogenase [ec:1.12.99.6]	R97		'UQ[c] + H2[c] --> UQH2[c]'	Hydrogen dehydrogenase [ec:1.12.99.6]	R97		'UQ[c] + H2[c] --> UQH2[c]'	Hydrogen dehydrogenase [ec:1.12.99.6]
R98		'NADH[c] + UQ[c] --> NAD[c] + UQH2[c]'	NADH-quinone oxidoreductase [ec:1.6.5.9]	R98		'NADH[c] + UQ[c] --> NAD[c] + UQH2[c]'	NADH-quinone oxidoreductase [ec:1.6.5.9]	R98		'NADH[c] + UQ[c] --> NAD[c] + UQH2[c]'	NADH-quinone oxidoreductase [ec:1.6.5.9]	R98		'NADH[c] + UQ[c] --> NAD[c] + UQH2[c]'	NADH-quinone oxidoreductase [ec:1.6.5.9]	R98		'NADH[c] + UQ[c] --> NAD[c] + UQH2[c]'	NADH-quinone oxidoreductase [ec:1.6.5.9]
R99		'NADH[c] + UQ[c] + 4 H[c] --> NAD[c] + UQH2[c] + 4 H[e]'	NADH-quinone oxidoreductase [ec:7.1.1.2]	R99		'NADH[c] + UQ[c] + 4 H[c] --> NAD[c] + UQH2[c] + 4 H[e]'	NADH-quinone oxidoreductase [ec:7.1.1.2]	R99		'NADH[c] + UQ[c] + 4 H[c] --> NAD[c] + UQH2[c] + 4 H[e]'	NADH-quinone oxidoreductase [ec:7.1.1.2]	R99		'NADH[c] + UQ[c] + 4 H[c] --> NAD[c] + UQH2[c] + 4 H[e]'	NADH-quinone oxidoreductase [ec:7.1.1.2]	R99		'NADH[c] + UQ[c] + 4 H[c] --> NAD[c] + UQH2[c] + 4 H[e]'	NADH-quinone oxidoreductase [ec:7.1.1.2]
R100		'UQH2[c] + 4 H[c] + 0.5 O2[c] --> UQ[c] + 4 H[e]'	Cytochrome bd oxidase [ec:7.1.1.7]	R100		'UQH2[c] + 4 H[c] + 0.5 O2[c] --> UQ[c] + 4 H[e]'	Cytochrome bd oxidase [ec:7.1.1.7]	R100		'UQH2[c] + 4 H[c] + 0.5 O2[c] --> UQ[c] + 4 H[e]'	Cytochrome bd oxidase [ec:7.1.1.7]	R100		'UQH2[c] + 4 H[c] + 0.5 O2[c] --> UQ[c] + 4 H[e]'	Cytochrome bd oxidase [ec:7.1.1.7]	R100		'UQH2[c] + 4 H[c] + 0.5 O2[c] --> UQ[c] + 4 H[e]'	Cytochrome bd oxidase [ec:7.1.1.7]
R101		'UQH2[c] + 2 H[c] + 0.5 O2[c] --> UQ[c] + 2 H[e]'	Cytochrome bo oxidase [ec:7.1.1.3]	R101		'UQH2[c] + 2 H[c] + 0.5 O2[c] --> UQ[c] + 2 H[e]'	Cytochrome bo oxidase [ec:7.1.1.3]	R101		'UQH2[c] + 2 H[c] + 0.5 O2[c] --> UQ[c] + 2 H[e]'	Cytochrome bo oxidase [ec:7.1.1.3]	R101		'UQH2[c] + 2 H[c] + 0.5 O2[c] --> UQ[c] + 2 H[e]'	Cytochrome bo oxidase [ec:7.1.1.3]	R101		'UQH2[c] + 2 H[c] + 0.5 O2[c] --> UQ[c] + 2 H[e]'	Cytochrome bo oxidase [ec:7.1.1.3]
R102		'ADP[c] + 4 H[e] + Pi[c] --> ATP[c] + 4 H[c]'	ATP synthase [ec:3.6.3.14]	R102		'ADP[c] + 4 H[e] + Pi[c] --> ATP[c] + 4 H[c]'	ATP synthase [ec:3.6.3.14]	R102		'ADP[c] + 4 H[e] + Pi[c] --> ATP[c] + 4 H[c]'	ATP synthase [ec:3.6.3.14]	R102		'ADP[c] + 4 H[e] + Pi[c] --> ATP[c] + 4 H[c]'	ATP synthase [ec:3.6.3.14]	R102		'ADP[c] + 4 H[e] + Pi[c] --> ATP[c] + 4 H[c]'	ATP synthase [ec:3.6.3.14]
R103		'ADP[c] + 3 H[e] + Pi[c] <-- ATP[c] + 3 H[c]'	reverse ATP synthase (proton pump) [ec:3.6.3.14]	R103		'ADP[c] + 3 H[e] + Pi[c] <-- ATP[c] + 3 H[c]'	reverse ATP synthase (proton pump) [ec:3.6.3.14]	R103		'ADP[c] + 3 H[e] + Pi[c] <-- ATP[c] + 3 H[c]'	reverse ATP synthase (proton pump) [ec:3.6.3.14]	R103		'ADP[c] + 3 H[e] + Pi[c] <-- ATP[c] + 3 H[c]'	reverse ATP synthase (proton pump) [ec:3.6.3.14]	R103		'ADP[c] + 3 H[e] + Pi[c] <-- ATP[c] + 3 H[c]'	reverse ATP synthase (proton pump) [ec:3.6.3.14]
R104		'AMP[c] + ATP[c] --> 2 ADP[c]'	Adenylate kinase [ec:2.7.4.3]	R104		'AMP[c] + ATP[c] --> 2 ADP[c]'	Adenylate kinase [ec:2.7.4.3]	R104		'AMP[c] + ATP[c] --> 2 ADP[c]'	Adenylate kinase [ec:2.7.4.3]	R104		'AMP[c] + ATP[c] --> 2 ADP[c]'	Adenylate kinase [ec:2.7.4.3]	R104		'AMP[c] + ATP[c] --> 2 ADP[c]'	Adenylate kinase [ec:2.7.4.3]
R105		'AC-CoA[c] + CO2[c] + ATP[c] --> MAL-CoA[c] + ADP[c] + Pi[c]'	Acetyl-CoA carboxylase [ec:6.4.1.2]	R105		'AC-CoA[c] + CO2[c] + ATP[c] --> MAL-CoA[c] + ADP[c] + Pi[c]'	Acetyl-CoA carboxylase [ec:6.4.1.2]	R105		'AC-CoA[c] + CO2[c] + ATP[c] --> MAL-CoA[c] + ADP[c] + Pi[c]'	Acetyl-CoA carboxylase [ec:6.4.1.2]	R105		'AC-CoA[c] + CO2[c] + ATP[c] --> MAL-CoA[c] + ADP[c] + Pi[c]'	Acetyl-CoA carboxylase [ec:6.4.1.2]	R105		'AC-CoA[c] + CO2[c] + ATP[c] --> MAL-CoA[c] + ADP[c] + Pi[c]'	Acetyl-CoA carboxylase [ec:6.4.1.2]
R106		'MAL-CoA[c] + NADPH[c] --> Malonate-semialdehyde[c] + H-CoA[c] + NADP[c]'	Malonyl-CoA reductase [ec:1.2.1.75]	R106		'MAL-CoA[c] + NADPH[c] --> Malonate-semialdehyde[c] + H-CoA[c] + NADP[c]'	Malonyl-CoA reductase [ec:1.2.1.75]	R106		'MAL-CoA[c] + NADPH[c] --> Malonate-semialdehyde[c] + H-CoA[c] + NADP[c]'	Malonyl-CoA reductase [ec:1.2.1.75]	R106		'MAL-CoA[c] + NADPH[c] --> Malonate-semialdehyde[c] + H-CoA[c] + NADP[c]'	Malonyl-CoA reductase [ec:1.2.1.75]	R106		'MAL-CoA[c] + NADPH[c] --> Malonate-semialdehyde[c] + H-CoA[c] + NADP[c]'	Malonyl-CoA reductase [ec:1.2.1.75]
R107		'Malonate-semialdehyde[c] + NADPH[c] --> 3-Hydroxypropanoate[c] + NADP[c]'	3-Hydroxypropionate dehydrogenase [ec:1.1.1.59]	R107		'Malonate-semialdehyde[c] + NADPH[c] --> 3-Hydroxypropanoate[c] + NADP[c]'	3-Hydroxypropionate dehydrogenase [ec:1.1.1.59]	R107		'Malonate-semialdehyde[c] + NADPH[c] --> 3-Hydroxypropanoate[c] + NADP[c]'	3-Hydroxypropionate dehydrogenase [ec:1.1.1.59]	R107		'Malonate-semialdehyde[c] + NADPH[c] --> 3-Hydroxypropanoate[c] + NADP[c]'	3-Hydroxypropionate dehydrogenase [ec:1.1.1.59]	R107		'Malonate-semialdehyde[c] + NADPH[c] --> 3-Hydroxypropanoate[c] + NADP[c]'	3-Hydroxypropionate dehydrogenase [ec:1.1.1.59]
R108		'AC-CoA[c] + 3-Hydroxypropanoate[c] <--> AC[c] + 3-Hydroxypropanoyl-CoA[c]'	Propionate CoA-transferase [ec:2.8.3.1]	R108		'AC-CoA[c] + 3-Hydroxypropanoate[c] <--> AC[c] + 3-Hydroxypropanoyl-CoA[c]'	Propionate CoA-transferase [ec:2.8.3.1]	R108		'AC-CoA[c] + 3-Hydroxypropanoate[c] <--> AC[c] + 3-Hydroxypropanoyl-CoA[c]'	Propionate CoA-transferase [ec:2.8.3.1]	R108		'AC-CoA[c] + 3-Hydroxypropanoate[c] <--> AC[c] + 3-Hydroxypropanoyl-CoA[c]'	Propionate CoA-transferase [ec:2.8.3.1]	R108		'AC-CoA[c] + 3-Hydroxypropanoate[c] <--> AC[c] + 3-Hydroxypropanoyl-CoA[c]'	Propionate CoA-transferase [ec:2.8.3.1]
R109		'3-Hydroxypropanoyl-CoA[c] --> P-3HP[c] + H-CoA[c]'	Poly(3-hydroxyalkanoate) synthase [ec:2.3.1.-]	R109		'3-Hydroxypropanoyl-CoA[c] --> P-3HP[c] + H-CoA[c]'	Poly(3-hydroxyalkanoate) synthase [ec:2.3.1.-]	R109		'3-Hydroxypropanoyl-CoA[c] --> P-3HP[c] + H-CoA[c]'	Poly(3-hydroxyalkanoate) synthase [ec:2.3.1.-]	R109		'3-Hydroxypropanoyl-CoA[c] --> P-3HP[c] + H-CoA[c]'	Poly(3-hydroxyalkanoate) synthase [ec:2.3.1.-]	R109		'3-Hydroxypropanoyl-CoA[c] --> P-3HP[c] + H-CoA[c]'	Poly(3-hydroxyalkanoate) synthase [ec:2.3.1.-]
	};				};				};				};				};
	mnet = CalculateFluxModes(ReactionFormulas,CreateFluxModeOpts('parse-only',true));				mnet = CalculateFluxModes(ReactionFormulas,CreateFluxModeOpts('parse-only',true));				mnet = CalculateFluxModes(ReactionFormulas,CreateFluxModeOpts('parse-only',true));				mnet = CalculateFluxModes(ReactionFormulas,CreateFluxModeOpts('parse-only',true));				mnet = CalculateFluxModes(ReactionFormulas,CreateFluxModeOpts('parse-only',true));

## Sheet: P3HB
	C. necator on Fructose + CO2				C. necator on Glycerol + CO2				C. necator on Acetate + CO2				C. necator on Formate + CO2				C. necator on CO2 + H2
RxN		Equation	Function / Enzyme	RxN		Equation	Function / Enzyme	RxN		Equation	Function / Enzyme	RxN		Equation	Function / Enzyme	RxN		Equation	Function / Enzyme
R1	ReactionFormulas = {	'--> CO2[e]'	Carbondioxide in	R1	ReactionFormulas = {	'--> CO2[e]'	Carbondioxide in	R1	ReactionFormulas = {	'--> CO2[e]'	Carbondioxide in	R1	ReactionFormulas = {	'--> CO2[e]'	Carbondioxide in	R1	ReactionFormulas = {	'--> CO2[e]'	Carbondioxide in
R2		'--> FRC[e]'	Fructose in	R2		'--> GLY[e]'	Fructose in	R2		'--> AC[e]'	Fructose in	R2		'--> FOR[e]'	Fructose in	R2		'--> H2[e]'	Hydrogen in
R3		'--> NH3[e]'	Ammonia in	R3		'--> NH3[e]'	Ammonia in	R3		'--> NH3[e]'	Ammonia in	R3		'--> NH3[e]'	Ammonia in	R3		'--> NH3[e]'	Ammonia in
R4		'--> O2[e]'	Oxygen in	R4		'--> O2[e]'	Oxygen in	R4		'--> O2[e]'	Oxygen in	R4		'--> O2[e]'	Oxygen in	R4		'--> O2[e]'	Oxygen in
R5		'CO2[e] -->'	Carbondioxide out	R5		'CO2[e] -->'	Carbondioxide out	R5		'CO2[e] -->'	Carbondioxide out	R5		'CO2[e] -->'	Carbondioxide out	R5		'CO2[e] -->'	Carbondioxide out
R6		'FOR[e] -->'	Formate out	R6		'FOR[e] -->'	Formate out	R6		'FOR[e] -->'	Formate out	R6		'FOR[e] -->'	Formate out	R6		'FOR[e] -->'	Formate out
R7		'AC[e] -->'	Acetate out	R7		'AC[e] -->'	Acetate out	R7		'AC[e] -->'	Acetate out	R7		'AC[e] -->'	Acetate out	R7		'AC[e] -->'	Acetate out
R8		'ETOH[e] -->'	Ethanol out	R8		'ETOH[e] -->'	Ethanol out	R8		'ETOH[e] -->'	Ethanol out	R8		'ETOH[e] -->'	Ethanol out	R8		'ETOH[e] -->'	Ethanol out
R9		'LAC[e] -->'	Lactate out	R9		'LAC[e] -->'	Lactate out	R9		'LAC[e] -->'	Lactate out	R9		'LAC[e] -->'	Lactate out	R9		'LAC[e] -->'	Lactate out
R10		'ACETONE[e] -->'	Acetone out	R10		'ACETONE[e] -->'	Acetone out	R10		'ACETONE[e] -->'	Acetone out	R10		'ACETONE[e] -->'	Acetone out	R10		'ACETONE[e] -->'	Acetone out
R11		'SUC[e] -->'	Succinate out	R11		'SUC[e] -->'	Succinate out	R11		'SUC[e] -->'	Succinate out	R11		'SUC[e] -->'	Succinate out	R11		'SUC[e] -->'	Succinate out
R12		'PHB[e] -->'	Polyhydroxybutyrate out	R12		'PHB[e] -->'	Polyhydroxybutyrate out	R12		'PHB[e] -->'	Polyhydroxybutyrate out	R12		'PHB[e] -->'	Polyhydroxybutyrate out	R12		'PHB[e] -->'	Polyhydroxybutyrate out
R13		'BIOMASS[e] -->'	Biomass out	R13		'BIOMASS[e] -->'	Biomass out	R13		'BIOMASS[e] -->'	Biomass out	R13		'BIOMASS[e] -->'	Biomass out	R13		'BIOMASS[e] -->'	Biomass out
R14		'PRODUCT[e] -->'	Product out	R14		'PRODUCT[e] -->'	Product out	R14		'PRODUCT[e] -->'	Product out	R14		'PRODUCT[e] -->'	Product out	R14		'PRODUCT[e] -->'	Product out
R15		'FOR[c] + H[c] + 0.3 ATP[c] --> FOR[e] + H[e] + 0.3 ADP[c] + 0.3 Pi[c]'	Formate export by ABC transporter	R15		'FOR[c] + H[c] + 0.3 ATP[c] --> FOR[e] + H[e] + 0.3 ADP[c] + 0.3 Pi[c]'	Formate export by ABC transporter	R15		'FOR[c] + H[c] + 0.3 ATP[c] --> FOR[e] + H[e] + 0.3 ADP[c] + 0.3 Pi[c]'	Formate export by ABC transporter	R15		'FOR[c] + H[c] <-- FOR[e] + H[e]'	Formate export by ABC transporter	R15		'FOR[c] + H[c] + 0.3 ATP[c] --> FOR[e] + H[e] + 0.3 ADP[c] + 0.3 Pi[c]'	Formate export by ABC transporter
R16		'AC[c] + H[c] + 0.3 ATP[c] --> AC[e] + H[e] + 0.3 ADP[c] + 0.3 Pi[c]'	Acetate export by ABC transporter	R16		'AC[c] + H[c] + 0.3 ATP[c] --> AC[e] + H[e] + 0.3 ADP[c] + 0.3 Pi[c]'	Acetate export by ABC transporter	R16		'AC[c] + H[c] <-- AC[e] + H[e]'	Acetate export by ABC transporter	R16		'AC[c] + H[c] + 0.3 ATP[c] --> AC[e] + H[e] + 0.3 ADP[c] + 0.3 Pi[c]'	Acetate export by ABC transporter	R16		'AC[c] + H[c] + 0.3 ATP[c] --> AC[e] + H[e] + 0.3 ADP[c] + 0.3 Pi[c]'	Acetate export by ABC transporter
R17		'ETOH[c] --> ETOH[e]'	Ethanol export by diffusion	R17		'ETOH[c] --> ETOH[e]'	Ethanol export by diffusion	R17		'ETOH[c] --> ETOH[e]'	Ethanol export by diffusion	R17		'ETOH[c] --> ETOH[e]'	Ethanol export by diffusion	R17		'ETOH[c] --> ETOH[e]'	Ethanol export by diffusion
R18		'LAC[c] + H[c] + 0.3 ATP[c] --> LAC[e] + H[e] + 0.3 ADP[c] + 0.3 Pi[c]'	Lactate export by ABC transporter	R18		'LAC[c] + H[c] + 0.3 ATP[c] --> LAC[e] + H[e] + 0.3 ADP[c] + 0.3 Pi[c]'	Lactate export by ABC transporter	R18		'LAC[c] + H[c] + 0.3 ATP[c] --> LAC[e] + H[e] + 0.3 ADP[c] + 0.3 Pi[c]'	Lactate export by ABC transporter	R18		'LAC[c] + H[c] + 0.3 ATP[c] --> LAC[e] + H[e] + 0.3 ADP[c] + 0.3 Pi[c]'	Lactate export by ABC transporter	R18		'LAC[c] + H[c] + 0.3 ATP[c] --> LAC[e] + H[e] + 0.3 ADP[c] + 0.3 Pi[c]'	Lactate export by ABC transporter
R19		'ACETONE[c] --> ACETONE[e]'	Acetone export by diffusion	R19		'ACETONE[c] --> ACETONE[e]'	Acetone export by diffusion	R19		'ACETONE[c] --> ACETONE[e]'	Acetone export by diffusion	R19		'ACETONE[c] --> ACETONE[e]'	Acetone export by diffusion	R19		'ACETONE[c] --> ACETONE[e]'	Acetone export by diffusion
R20		'SUC[c] + 2 H[c] + 0.6 ATP[c] --> SUC[e] + 2 H[e] + 0.6 ADP[c] + 0.6 Pi[c]'	Succinate export by ABC transporter	R20		'SUC[c] + 2 H[c] + 0.6 ATP[c] --> SUC[e] + 2 H[e] + 0.6 ADP[c] + 0.6 Pi[c]'	Succinate export by ABC transporter	R20		'SUC[c] + 2 H[c] + 0.6 ATP[c] --> SUC[e] + 2 H[e] + 0.6 ADP[c] + 0.6 Pi[c]'	Succinate export by ABC transporter	R20		'SUC[c] + 2 H[c] + 0.6 ATP[c] --> SUC[e] + 2 H[e] + 0.6 ADP[c] + 0.6 Pi[c]'	Succinate export by ABC transporter	R20		'SUC[c] + 2 H[c] + 0.6 ATP[c] --> SUC[e] + 2 H[e] + 0.6 ADP[c] + 0.6 Pi[c]'	Succinate export by ABC transporter
R21		'BIOMASS[c] --> BIOMASS[e]'	Growth	R21		'BIOMASS[c] --> BIOMASS[e]'	Growth	R21		'BIOMASS[c] --> BIOMASS[e]'	Growth	R21		'BIOMASS[c] --> BIOMASS[e]'	Growth	R21		'BIOMASS[c] --> BIOMASS[e]'	Growth
R22		'P-3HB[c] --> PRODUCT[e]'	Product formation	R22		'P-3HB[c] --> PRODUCT[e]'	Product formation	R22		'P-3HB[c] --> PRODUCT[e]'	Product formation	R22		'P-3HB[c] --> PRODUCT[e]'	Product formation	R22		'P-3HB[c] --> PRODUCT[e]'	Product formation
R23		'O2[e] --> O2[c]'	Oxygen import by diffusion	R23		'O2[e] --> O2[c]'	Oxygen import by diffusion	R23		'O2[e] --> O2[c]'	Oxygen import by diffusion	R23		'O2[e] --> O2[c]'	Oxygen import by diffusion	R23		'O2[e] --> O2[c]'	Oxygen import by diffusion
R24		'NH3[e] --> NH3[c]'	Ammonia import by diffusion	R24		'NH3[e] --> NH3[c]'	Ammonia import by diffusion	R24		'NH3[e] --> NH3[c]'	Ammonia import by diffusion	R24		'NH3[e] --> NH3[c]'	Ammonia import by diffusion	R24		'NH3[e] --> NH3[c]'	Ammonia import by diffusion
R25		'H2[e] --> H2[c]'	Hydrogen import by diffusion	R25		'H2[e] --> H2[c]'	Hydrogen import by diffusion	R25		'H2[e] --> H2[c]'	Hydrogen import by diffusion	R25		'H2[e] --> H2[c]'	Hydrogen import by diffusion	R25		'H2[e] --> H2[c]'	Hydrogen import by diffusion
R26		'CO2[e] <--> CO2[c]'	Carbondioxide import by diffusion	R26		'CO2[e] <--> CO2[c]'	Carbondioxide import by diffusion	R26		'CO2[e] <--> CO2[c]'	Carbondioxide import by diffusion	R26		'CO2[e] <--> CO2[c]'	Carbondioxide import by diffusion	R26		'CO2[e] <--> CO2[c]'	Carbondioxide exchange by diffusion
R27		'FRC[e] + PEP[c] --> F6P[c] + PYR[c]'	PTS [ec:2.7.1.69]	R27		'FRC[e] + PEP[c] --> F6P[c] + PYR[c]'	PTS [ec:2.7.1.69]	R27		'FRC[e] + PEP[c] --> F6P[c] + PYR[c]'	PTS [ec:2.7.1.69]	R27		'FRC[e] + PEP[c] --> F6P[c] + PYR[c]'	PTS [ec:2.7.1.69]	R27		'FRC[e] + PEP[c] --> F6P[c] + PYR[c]'	PTS [ec:2.7.1.69]
R28		'GLY[e] + ATP[c] --> ADP[c] + GLY3P[c]'	Glycerol kinase [ec:2.7.1.30]	R28		'GLY[e] + ATP[c] --> ADP[c] + GLY3P[c]'	Glycerol kinase [ec:2.7.1.30]	R28		'GLY[e] + ATP[c] --> ADP[c] + GLY3P[c]'	Glycerol kinase [ec:2.7.1.30]	R28		'GLY[e] + ATP[c] --> ADP[c] + GLY3P[c]'	Glycerol kinase [ec:2.7.1.30]	R28		'GLY[e] + ATP[c] --> ADP[c] + GLY3P[c]'	Glycerol kinase [ec:2.7.1.30]
R29		'G6P[c] + NADP[c] --> 6-PG-lac[c] + NADPH[c]'	Glucose-6-phosphate dehydrogenase [ec:1.1.1.49]	R29		'G6P[c] + NADP[c] --> 6-PG-lac[c] + NADPH[c]'	Glucose-6-phosphate dehydrogenase [ec:1.1.1.49]	R29		'G6P[c] + NADP[c] --> 6-PG-lac[c] + NADPH[c]'	Glucose-6-phosphate dehydrogenase [ec:1.1.1.49]	R29		'G6P[c] + NADP[c] --> 6-PG-lac[c] + NADPH[c]'	Glucose-6-phosphate dehydrogenase [ec:1.1.1.49]	R29		'G6P[c] + NADP[c] --> 6-PG-lac[c] + NADPH[c]'	Glucose-6-phosphate dehydrogenase [ec:1.1.1.49]
R30		'6-PG-lac[c] --> 6-PG[c]'	6-phosphogluconolactonase [ec:3.1.1.31]	R30		'6-PG-lac[c] --> 6-PG[c]'	6-phosphogluconolactonase [ec:3.1.1.31]	R30		'6-PG-lac[c] --> 6-PG[c]'	6-phosphogluconolactonase [ec:3.1.1.31]	R30		'6-PG-lac[c] --> 6-PG[c]'	6-phosphogluconolactonase [ec:3.1.1.31]	R30		'6-PG-lac[c] --> 6-PG[c]'	6-phosphogluconolactonase [ec:3.1.1.31]
R31		'6-PG[c] --> KDPG[c]'	6-phosphogluconate dehydratase [ec:4.2.1.12]	R31		'6-PG[c] --> KDPG[c]'	6-phosphogluconate dehydratase [ec:4.2.1.12]	R31		'6-PG[c] --> KDPG[c]'	6-phosphogluconate dehydratase [ec:4.2.1.12]	R31		'6-PG[c] --> KDPG[c]'	6-phosphogluconate dehydratase [ec:4.2.1.12]	R31		'6-PG[c] --> KDPG[c]'	6-phosphogluconate dehydratase [ec:4.2.1.12]
R32		'KDPG[c] --> G3P[c] + PYR[c]'	2-keto-3-deoxy-6-phosphogluconate aldolase [ec:4.1.2.14]	R32		'KDPG[c] --> G3P[c] + PYR[c]'	2-keto-3-deoxy-6-phosphogluconate aldolase [ec:4.1.2.14]	R32		'KDPG[c] --> G3P[c] + PYR[c]'	2-keto-3-deoxy-6-phosphogluconate aldolase [ec:4.1.2.14]	R32		'KDPG[c] --> G3P[c] + PYR[c]'	2-keto-3-deoxy-6-phosphogluconate aldolase [ec:4.1.2.14]	R32		'KDPG[c] --> G3P[c] + PYR[c]'	2-keto-3-deoxy-6-phosphogluconate aldolase [ec:4.1.2.14]
R33		'6-PG[c] + NADP[c] --> Ril5P[c] + NADPH[c] + CO2[c]'	6-phosphogluconate dehydrogenase [ec:1.1.1.44]	R33		'6-PG[c] + NADP[c] --> Ril5P[c] + NADPH[c] + CO2[c]'	6-phosphogluconate dehydrogenase [ec:1.1.1.44]	R33		'6-PG[c] + NADP[c] --> Ril5P[c] + NADPH[c] + CO2[c]'	6-phosphogluconate dehydrogenase [ec:1.1.1.44]	R33		'6-PG[c] + NADP[c] --> Ril5P[c] + NADPH[c] + CO2[c]'	6-phosphogluconate dehydrogenase [ec:1.1.1.44]	R33		'6-PG[c] + NADP[c] --> Ril5P[c] + NADPH[c] + CO2[c]'	6-phosphogluconate dehydrogenase [ec:1.1.1.44]
R34		'Ril5P[c] + ATP[c] --> Ril15BP[c] + ADP[c]'	Phosphoribulokinase [ec:2.7.1.19]	R34		'Ril5P[c] + ATP[c] --> Ril15BP[c] + ADP[c]'	Phosphoribulokinase [ec:2.7.1.19]	R34		'Ril5P[c] + ATP[c] --> Ril15BP[c] + ADP[c]'	Phosphoribulokinase [ec:2.7.1.19]	R34		'Ril5P[c] + ATP[c] --> Ril15BP[c] + ADP[c]'	Phosphoribulokinase [ec:2.7.1.19]	R34		'Ril5P[c] + ATP[c] --> Ril15BP[c] + ADP[c]'	Phosphoribulokinase [ec:2.7.1.19]
R35		'5 Ril15BP[c] + 4 CO2[c] + 1 O2[c] --> 9 3-PG[c] + 1 PG[c]'	Ribulose-1,5-bisphosphate carboxylase/oxygenase (RuBisCO) "best case" [ec:4.1.1.39]	R35		'5 Ril15BP[c] + 4 CO2[c] + 1 O2[c] --> 9 3-PG[c] + 1 PG[c]'	Ribulose-1,5-bisphosphate carboxylase/oxygenase (RuBisCO) "best case" [ec:4.1.1.39]	R35		'5 Ril15BP[c] + 4 CO2[c] + 1 O2[c] --> 9 3-PG[c] + 1 PG[c]'	Ribulose-1,5-bisphosphate carboxylase/oxygenase (RuBisCO) "best case" [ec:4.1.1.39]	R35		'5 Ril15BP[c] + 4 CO2[c] + 1 O2[c] --> 9 3-PG[c] + 1 PG[c]'	Ribulose-1,5-bisphosphate carboxylase/oxygenase (RuBisCO) "best case" [ec:4.1.1.39]	R35		'5 Ril15BP[c] + 4 CO2[c] + 1 O2[c] --> 9 3-PG[c] + 1 PG[c]'	Ribulose-1,5-bisphosphate carboxylase/oxygenase (RuBisCO) "best case" [ec:4.1.1.39]
R36		'4 Ril15BP[c] + 3 CO2[c] + 1 O2[c] --> 7 3-PG[c] + 1 PG[c]'	Ribulose-1,5-bisphosphate carboxylase/oxygenase (RuBisCO) "worst case" [ec:4.1.1.39]	R36		'4 Ril15BP[c] + 3 CO2[c] + 1 O2[c] --> 7 3-PG[c] + 1 PG[c]'	Ribulose-1,5-bisphosphate carboxylase/oxygenase (RuBisCO) "worst case" [ec:4.1.1.39]	R36		'4 Ril15BP[c] + 3 CO2[c] + 1 O2[c] --> 7 3-PG[c] + 1 PG[c]'	Ribulose-1,5-bisphosphate carboxylase/oxygenase (RuBisCO) "worst case" [ec:4.1.1.39]	R36		'4 Ril15BP[c] + 3 CO2[c] + 1 O2[c] --> 7 3-PG[c] + 1 PG[c]'	Ribulose-1,5-bisphosphate carboxylase/oxygenase (RuBisCO) "worst case" [ec:4.1.1.39]	R36		'4 Ril15BP[c] + 3 CO2[c] + 1 O2[c] --> 7 3-PG[c] + 1 PG[c]'	Ribulose-1,5-bisphosphate carboxylase/oxygenase (RuBisCO) "worst case" [ec:4.1.1.39]
R37		'PG[c] --> GA[c] + Pi[c]'	2-phosphoglycolate phosphohydrolase [ec:3.1.3.18]	R37		'PG[c] --> GA[c] + Pi[c]'	2-phosphoglycolate phosphohydrolase [ec:3.1.3.18]	R37		'PG[c] --> GA[c] + Pi[c]'	2-phosphoglycolate phosphohydrolase [ec:3.1.3.18]	R37		'PG[c] --> GA[c] + Pi[c]'	2-phosphoglycolate phosphohydrolase [ec:3.1.3.18]	R37		'PG[c] --> GA[c] + Pi[c]'	2-phosphoglycolate phosphohydrolase [ec:3.1.3.18]
R38		'2 GA[c] + O2[c] --> 2 GLYOX[c]'	Glycolate dehydrogenase [ec:1.1.99.14]	R38		'2 GA[c] + O2[c] --> 2 GLYOX[c]'	Glycolate dehydrogenase [ec:1.1.99.14]	R38		'2 GA[c] + O2[c] --> 2 GLYOX[c]'	Glycolate dehydrogenase [ec:1.1.99.14]	R38		'2 GA[c] + O2[c] --> 2 GLYOX[c]'	Glycolate dehydrogenase [ec:1.1.99.14]	R38		'2 GA[c] + O2[c] --> 2 GLYOX[c]'	Glycolate dehydrogenase [ec:1.1.99.14]
R39		'2 GLYOX[c] --> TS[c] + CO2[c]'	Tartronate-semialdehyde synthase [ec:4.1.1.47]	R39		'2 GLYOX[c] --> TS[c] + CO2[c]'	Tartronate-semialdehyde synthase [ec:4.1.1.47]	R39		'2 GLYOX[c] --> TS[c] + CO2[c]'	Tartronate-semialdehyde synthase [ec:4.1.1.47]	R39		'2 GLYOX[c] --> TS[c] + CO2[c]'	Tartronate-semialdehyde synthase [ec:4.1.1.47]	R39		'2 GLYOX[c] --> TS[c] + CO2[c]'	Tartronate-semialdehyde synthase [ec:4.1.1.47]
R40		'TS[c] + NADH[c] --> Glycerate[c] + NAD[c]'	2-hydroxy-3-oxopropionate reductase [ec:1.1.1.60]	R40		'TS[c] + NADH[c] --> Glycerate[c] + NAD[c]'	2-hydroxy-3-oxopropionate reductase [ec:1.1.1.60]	R40		'TS[c] + NADH[c] --> Glycerate[c] + NAD[c]'	2-hydroxy-3-oxopropionate reductase [ec:1.1.1.60]	R40		'TS[c] + NADH[c] --> Glycerate[c] + NAD[c]'	2-hydroxy-3-oxopropionate reductase [ec:1.1.1.60]	R40		'TS[c] + NADH[c] --> Glycerate[c] + NAD[c]'	2-hydroxy-3-oxopropionate reductase [ec:1.1.1.60]
R41		'Glycerate[c] + ATP[c] --> 2-PG[c] + ADP[c]'	Glycerate 2-kinase [ec:2.7.1.165]	R41		'Glycerate[c] + ATP[c] --> 2-PG[c] + ADP[c]'	Glycerate 2-kinase [ec:2.7.1.165]	R41		'Glycerate[c] + ATP[c] --> 2-PG[c] + ADP[c]'	Glycerate 2-kinase [ec:2.7.1.165]	R41		'Glycerate[c] + ATP[c] --> 2-PG[c] + ADP[c]'	Glycerate 2-kinase [ec:2.7.1.165]	R41		'Glycerate[c] + ATP[c] --> 2-PG[c] + ADP[c]'	Glycerate 2-kinase [ec:2.7.1.165]
R42		'Ril5P[c] <--> R5P[c]'	Ribose-5-phosphate isomerase [ec:5.3.1.6]	R42		'Ril5P[c] <--> R5P[c]'	Ribose-5-phosphate isomerase [ec:5.3.1.6]	R42		'Ril5P[c] <--> R5P[c]'	Ribose-5-phosphate isomerase [ec:5.3.1.6]	R42		'Ril5P[c] <--> R5P[c]'	Ribose-5-phosphate isomerase [ec:5.3.1.6]	R42		'Ril5P[c] <--> R5P[c]'	Ribose-5-phosphate isomerase [ec:5.3.1.6]
R43		'Ril5P[c] <--> X5P[c]'	Ribulose-phosphate 3-epimerase [ec:5.1.3.1]	R43		'Ril5P[c] <--> X5P[c]'	Ribulose-phosphate 3-epimerase [ec:5.1.3.1]	R43		'Ril5P[c] <--> X5P[c]'	Ribulose-phosphate 3-epimerase [ec:5.1.3.1]	R43		'Ril5P[c] <--> X5P[c]'	Ribulose-phosphate 3-epimerase [ec:5.1.3.1]	R43		'Ril5P[c] <--> X5P[c]'	Ribulose-phosphate 3-epimerase [ec:5.1.3.1]
R44		'R5P[c] + X5P[c] <--> G3P[c] + S7P[c]'	Transketolase [ec:2.2.1.1]	R44		'R5P[c] + X5P[c] <--> G3P[c] + S7P[c]'	Transketolase [ec:2.2.1.1]	R44		'R5P[c] + X5P[c] <--> G3P[c] + S7P[c]'	Transketolase [ec:2.2.1.1]	R44		'R5P[c] + X5P[c] <--> G3P[c] + S7P[c]'	Transketolase [ec:2.2.1.1]	R44		'R5P[c] + X5P[c] <--> G3P[c] + S7P[c]'	Transketolase [ec:2.2.1.1]
R45		'G3P[c] + S7P[c] <--> E4P[c] + F6P[c]'	Transaldolase [ec:2.2.1.2]	R45		'G3P[c] + S7P[c] <--> E4P[c] + F6P[c]'	Transaldolase [ec:2.2.1.2]	R45		'G3P[c] + S7P[c] <--> E4P[c] + F6P[c]'	Transaldolase [ec:2.2.1.2]	R45		'G3P[c] + S7P[c] <--> E4P[c] + F6P[c]'	Transaldolase [ec:2.2.1.2]	R45		'G3P[c] + S7P[c] <--> E4P[c] + F6P[c]'	Transaldolase [ec:2.2.1.2]
R46		'X5P[c] + E4P[c] <--> F6P[c] + G3P[c]'	Transketolase [ec:2.2.1.1]	R46		'X5P[c] + E4P[c] <--> F6P[c] + G3P[c]'	Transketolase [ec:2.2.1.1]	R46		'X5P[c] + E4P[c] <--> F6P[c] + G3P[c]'	Transketolase [ec:2.2.1.1]	R46		'X5P[c] + E4P[c] <--> F6P[c] + G3P[c]'	Transketolase [ec:2.2.1.1]	R46		'X5P[c] + E4P[c] <--> F6P[c] + G3P[c]'	Transketolase [ec:2.2.1.1]
R47		'G6P[c] <--> F6P[c]'	Glucose-6-phosphate isomerase [ec:5.3.1.9]	R47		'G6P[c] <--> F6P[c]'	Glucose-6-phosphate isomerase [ec:5.3.1.9]	R47		'G6P[c] <--> F6P[c]'	Glucose-6-phosphate isomerase [ec:5.3.1.9]	R47		'G6P[c] <--> F6P[c]'	Glucose-6-phosphate isomerase [ec:5.3.1.9]	R47		'G6P[c] <--> F6P[c]'	Glucose-6-phosphate isomerase [ec:5.3.1.9]
R48		'F16BP[c] --> F6P[c] + Pi[c]'	Fructose-bisphosphatase [ec:3.1.3.11]	R48		'F16BP[c] --> F6P[c] + Pi[c]'	Fructose-bisphosphatase [ec:3.1.3.11]	R48		'F16BP[c] --> F6P[c] + Pi[c]'	Fructose-bisphosphatase [ec:3.1.3.11]	R48		'F16BP[c] --> F6P[c] + Pi[c]'	Fructose-bisphosphatase [ec:3.1.3.11]	R48		'F16BP[c] --> F6P[c] + Pi[c]'	Fructose-bisphosphatase [ec:3.1.3.11]
R49		'F16BP[c] <--> G3P[c] + DHAP[c]'	Fructose-bisphosphate aldolase [ec:4.1.2.13]	R49		'F16BP[c] <--> G3P[c] + DHAP[c]'	Fructose-bisphosphate aldolase [ec:4.1.2.13]	R49		'F16BP[c] <--> G3P[c] + DHAP[c]'	Fructose-bisphosphate aldolase [ec:4.1.2.13]	R49		'F16BP[c] <--> G3P[c] + DHAP[c]'	Fructose-bisphosphate aldolase [ec:4.1.2.13]	R49		'F16BP[c] <--> G3P[c] + DHAP[c]'	Fructose-bisphosphate aldolase [ec:4.1.2.13]
R50		'GLY3P[c] + NAD[c] --> DHAP[c] + NADH[c]'	Glycerol-3-phosphate dehydrogenase [ec:1.1.1.8]	R50		'GLY3P[c] + NAD[c] --> DHAP[c] + NADH[c]'	Glycerol-3-phosphate dehydrogenase [ec:1.1.1.8]	R50		'GLY3P[c] + NAD[c] --> DHAP[c] + NADH[c]'	Glycerol-3-phosphate dehydrogenase [ec:1.1.1.8]	R50		'GLY3P[c] + NAD[c] --> DHAP[c] + NADH[c]'	Glycerol-3-phosphate dehydrogenase [ec:1.1.1.8]	R50		'GLY3P[c] + NAD[c] --> DHAP[c] + NADH[c]'	Glycerol-3-phosphate dehydrogenase [ec:1.1.1.8]
R51		'DHAP[c] <--> G3P[c]'	Triose-phosphate isomerase [ec:5.3.1.1]	R51		'DHAP[c] <--> G3P[c]'	Triose-phosphate isomerase [ec:5.3.1.1]	R51		'DHAP[c] <--> G3P[c]'	Triose-phosphate isomerase [ec:5.3.1.1]	R51		'DHAP[c] <--> G3P[c]'	Triose-phosphate isomerase [ec:5.3.1.1]	R51		'DHAP[c] <--> G3P[c]'	Triose-phosphate isomerase [ec:5.3.1.1]
R52		'G3P[c] + NAD[c] + Pi[c] <--> BPG[c] + NADH[c]'	Glyceraldehyde 3-phosphate dehydrogenase [ec:1.2.1.12]	R52		'G3P[c] + NAD[c] + Pi[c] <--> BPG[c] + NADH[c]'	Glyceraldehyde 3-phosphate dehydrogenase [ec:1.2.1.12]	R52		'G3P[c] + NAD[c] + Pi[c] <--> BPG[c] + NADH[c]'	Glyceraldehyde 3-phosphate dehydrogenase [ec:1.2.1.12]	R52		'G3P[c] + NAD[c] + Pi[c] <--> BPG[c] + NADH[c]'	Glyceraldehyde 3-phosphate dehydrogenase [ec:1.2.1.12]	R52		'G3P[c] + NAD[c] + Pi[c] <--> BPG[c] + NADH[c]'	Glyceraldehyde 3-phosphate dehydrogenase [ec:1.2.1.12]
R53		'BPG[c] + ADP[c] <--> 3-PG[c] + ATP[c]'	Phosphoglycerate kinase [ec:2.7.2.3]	R53		'BPG[c] + ADP[c] <--> 3-PG[c] + ATP[c]'	Phosphoglycerate kinase [ec:2.7.2.3]	R53		'BPG[c] + ADP[c] <--> 3-PG[c] + ATP[c]'	Phosphoglycerate kinase [ec:2.7.2.3]	R53		'BPG[c] + ADP[c] <--> 3-PG[c] + ATP[c]'	Phosphoglycerate kinase [ec:2.7.2.3]	R53		'BPG[c] + ADP[c] <--> 3-PG[c] + ATP[c]'	Phosphoglycerate kinase [ec:2.7.2.3]
R54		'3-PG[c] <--> 2-PG[c]'	Phosphoglycerate mutase [ec:5.4.2.1]	R54		'3-PG[c] <--> 2-PG[c]'	Phosphoglycerate mutase [ec:5.4.2.1]	R54		'3-PG[c] <--> 2-PG[c]'	Phosphoglycerate mutase [ec:5.4.2.1]	R54		'3-PG[c] <--> 2-PG[c]'	Phosphoglycerate mutase [ec:5.4.2.1]	R54		'3-PG[c] <--> 2-PG[c]'	Phosphoglycerate mutase [ec:5.4.2.1]
R55		'2-PG[c] <--> PEP[c]'	Phosphopyruvate hydratase [ec:4.2.1.11]	R55		'2-PG[c] <--> PEP[c]'	Phosphopyruvate hydratase [ec:4.2.1.11]	R55		'2-PG[c] <--> PEP[c]'	Phosphopyruvate hydratase [ec:4.2.1.11]	R55		'2-PG[c] <--> PEP[c]'	Phosphopyruvate hydratase [ec:4.2.1.11]	R55		'2-PG[c] <--> PEP[c]'	Phosphopyruvate hydratase [ec:4.2.1.11]
R56		'PEP[c] + ADP[c] --> PYR[c] + ATP[c]'	Pyruvate kinase [ec:2.7.1.40]	R56		'PEP[c] + ADP[c] --> PYR[c] + ATP[c]'	Pyruvate kinase [ec:2.7.1.40]	R56		'PEP[c] + ADP[c] --> PYR[c] + ATP[c]'	Pyruvate kinase [ec:2.7.1.40]	R56		'PEP[c] + ADP[c] --> PYR[c] + ATP[c]'	Pyruvate kinase [ec:2.7.1.40]	R56		'PEP[c] + ADP[c] --> PYR[c] + ATP[c]'	Pyruvate kinase [ec:2.7.1.40]
R57		'PYR[c] + ATP[c] --> PEP[c] + AMP[c] + Pi[c]'	Phosphoenolpyruvate synthase [ec:2.7.9.2]	R57		'PYR[c] + ATP[c] --> PEP[c] + AMP[c] + Pi[c]'	Phosphoenolpyruvate synthase [ec:2.7.9.2]	R57		'PYR[c] + ATP[c] --> PEP[c] + AMP[c] + Pi[c]'	Phosphoenolpyruvate synthase [ec:2.7.9.2]	R57		'PYR[c] + ATP[c] --> PEP[c] + AMP[c] + Pi[c]'	Phosphoenolpyruvate synthase [ec:2.7.9.2]	R57		'PYR[c] + ATP[c] --> PEP[c] + AMP[c] + Pi[c]'	Phosphoenolpyruvate synthase [ec:2.7.9.2]
R58		'PYR[c] + NAD[c] + H-CoA[c] --> AC-CoA[c] + NADH[c] + CO2[c]'	Pyruvate dehydrogenase complex [ec:1.2.4.1&ec:2.3.1.12&ec:1.8.1.4]	R58		'PYR[c] + NAD[c] + H-CoA[c] --> AC-CoA[c] + NADH[c] + CO2[c]'	Pyruvate dehydrogenase complex [ec:1.2.4.1&ec:2.3.1.12&ec:1.8.1.4]	R58		'PYR[c] + NAD[c] + H-CoA[c] --> AC-CoA[c] + NADH[c] + CO2[c]'	Pyruvate dehydrogenase complex [ec:1.2.4.1&ec:2.3.1.12&ec:1.8.1.4]	R58		'PYR[c] + NAD[c] + H-CoA[c] --> AC-CoA[c] + NADH[c] + CO2[c]'	Pyruvate dehydrogenase complex [ec:1.2.4.1&ec:2.3.1.12&ec:1.8.1.4]	R58		'PYR[c] + NAD[c] + H-CoA[c] --> AC-CoA[c] + NADH[c] + CO2[c]'	Pyruvate dehydrogenase complex [ec:1.2.4.1&ec:2.3.1.12&ec:1.8.1.4]
R59		'PEP[c] + CO2[c] --> OXA[c] + Pi[c]'	Phosphoenolpyruvate carboxylase [ec:4.1.1.31]	R59		'PEP[c] + CO2[c] --> OXA[c] + Pi[c]'	Phosphoenolpyruvate carboxylase [ec:4.1.1.31]	R59		'PEP[c] + CO2[c] --> OXA[c] + Pi[c]'	Phosphoenolpyruvate carboxylase [ec:4.1.1.31]	R59		'PEP[c] + CO2[c] --> OXA[c] + Pi[c]'	Phosphoenolpyruvate carboxylase [ec:4.1.1.31]	R59		'PEP[c] + CO2[c] --> OXA[c] + Pi[c]'	Phosphoenolpyruvate carboxylase [ec:4.1.1.31]
R60		'PYR[c] + ATP[c] + CO2[c] <--> OXA[c] + ADP[c] + Pi[c]'	Pyruvate carboxylase [ec:6.4.1.1]	R60		'PYR[c] + ATP[c] + CO2[c] <--> OXA[c] + ADP[c] + Pi[c]'	Pyruvate carboxylase [ec:6.4.1.1]	R60		'PYR[c] + ATP[c] + CO2[c] <--> OXA[c] + ADP[c] + Pi[c]'	Pyruvate carboxylase [ec:6.4.1.1]	R60		'PYR[c] + ATP[c] + CO2[c] <--> OXA[c] + ADP[c] + Pi[c]'	Pyruvate carboxylase [ec:6.4.1.1]	R60		'PYR[c] + ATP[c] + CO2[c] <--> OXA[c] + ADP[c] + Pi[c]'	Pyruvate carboxylase [ec:6.4.1.1]
R61		'OXA[c] + ATP[c] --> PEP[c] + ADP[c] + CO2[c]'	Phosphoenolpyruvate carboxykinase [ec:4.1.1.49]	R61		'OXA[c] + ATP[c] --> PEP[c] + ADP[c] + CO2[c]'	Phosphoenolpyruvate carboxykinase [ec:4.1.1.49]	R61		'OXA[c] + ATP[c] --> PEP[c] + ADP[c] + CO2[c]'	Phosphoenolpyruvate carboxykinase [ec:4.1.1.49]	R61		'OXA[c] + ATP[c] --> PEP[c] + ADP[c] + CO2[c]'	Phosphoenolpyruvate carboxykinase [ec:4.1.1.49]	R61		'OXA[c] + ATP[c] --> PEP[c] + ADP[c] + CO2[c]'	Phosphoenolpyruvate carboxykinase [ec:4.1.1.49]
R62		'OXA[c] + AC-CoA[c] --> CIT[c] + H-CoA[c]'	Citrate synthase [ec:2.3.3.1]	R62		'OXA[c] + AC-CoA[c] --> CIT[c] + H-CoA[c]'	Citrate synthase [ec:2.3.3.1]	R62		'OXA[c] + AC-CoA[c] --> CIT[c] + H-CoA[c]'	Citrate synthase [ec:2.3.3.1]	R62		'OXA[c] + AC-CoA[c] --> CIT[c] + H-CoA[c]'	Citrate synthase [ec:2.3.3.1]	R62		'OXA[c] + AC-CoA[c] --> CIT[c] + H-CoA[c]'	Citrate synthase [ec:2.3.3.1]
R63		'CIT[c] <--> ISC[c]'	Aconitase [ec:4.2.1.3]	R63		'CIT[c] <--> ISC[c]'	Aconitase [ec:4.2.1.3]	R63		'CIT[c] <--> ISC[c]'	Aconitase [ec:4.2.1.3]	R63		'CIT[c] <--> ISC[c]'	Aconitase [ec:4.2.1.3]	R63		'CIT[c] <--> ISC[c]'	Aconitase [ec:4.2.1.3]
R64		'ISC[c] + NAD[c] --> aKG[c] + NADH[c] + CO2[c]'	Isocitrate dehydrogenase (NAD dependent) [ec:1.1.1.41]	R64		'ISC[c] + NAD[c] --> aKG[c] + NADH[c] + CO2[c]'	Isocitrate dehydrogenase (NAD dependent) [ec:1.1.1.41]	R64		'ISC[c] + NAD[c] --> aKG[c] + NADH[c] + CO2[c]'	Isocitrate dehydrogenase (NAD dependent) [ec:1.1.1.41]	R64		'ISC[c] + NAD[c] --> aKG[c] + NADH[c] + CO2[c]'	Isocitrate dehydrogenase (NAD dependent) [ec:1.1.1.41]	R64		'ISC[c] + NAD[c] --> aKG[c] + NADH[c] + CO2[c]'	Isocitrate dehydrogenase (NAD dependent) [ec:1.1.1.41]
R65		'aKG[c] + H-CoA[c] + NAD[c] --> SUC-CoA[c] + CO2[c] + NADH[c]'	α-ketoglutarate dehydrogenase [ec:1.2.4.2&2.3.1.61]	R65		'aKG[c] + H-CoA[c] + NAD[c] --> SUC-CoA[c] + CO2[c] + NADH[c]'	α-ketoglutarate dehydrogenase [ec:1.2.4.2&2.3.1.61]	R65		'aKG[c] + H-CoA[c] + NAD[c] --> SUC-CoA[c] + CO2[c] + NADH[c]'	α-ketoglutarate dehydrogenase [ec:1.2.4.2&2.3.1.61]	R65		'aKG[c] + H-CoA[c] + NAD[c] --> SUC-CoA[c] + CO2[c] + NADH[c]'	α-ketoglutarate dehydrogenase [ec:1.2.4.2&2.3.1.61]	R65		'aKG[c] + H-CoA[c] + NAD[c] --> SUC-CoA[c] + CO2[c] + NADH[c]'	α-ketoglutarate dehydrogenase [ec:1.2.4.2&2.3.1.61]
R66		'SUC-CoA[c] + ADP[c] + Pi[c] <--> SUC[c] + H-CoA[c] + ATP[c]'	Succinyl-CoA synthetase [ec:6.2.1.5]	R66		'SUC-CoA[c] + ADP[c] + Pi[c] <--> SUC[c] + H-CoA[c] + ATP[c]'	Succinyl-CoA synthetase [ec:6.2.1.5]	R66		'SUC-CoA[c] + ADP[c] + Pi[c] <--> SUC[c] + H-CoA[c] + ATP[c]'	Succinyl-CoA synthetase [ec:6.2.1.5]	R66		'SUC-CoA[c] + ADP[c] + Pi[c] <--> SUC[c] + H-CoA[c] + ATP[c]'	Succinyl-CoA synthetase [ec:6.2.1.5]	R66		'SUC-CoA[c] + ADP[c] + Pi[c] <--> SUC[c] + H-CoA[c] + ATP[c]'	Succinyl-CoA synthetase [ec:6.2.1.5]
R67		'SUC[c] + FAD[c] <--> FUM[c] + FADH2[c]'	Fumarate reductase [ec:1.3.5.4]	R67		'SUC[c] + FAD[c] <--> FUM[c] + FADH2[c]'	Fumarate reductase [ec:1.3.5.4]	R67		'SUC[c] + FAD[c] <--> FUM[c] + FADH2[c]'	Fumarate reductase [ec:1.3.5.4]	R67		'SUC[c] + FAD[c] <--> FUM[c] + FADH2[c]'	Fumarate reductase [ec:1.3.5.4]	R67		'SUC[c] + FAD[c] <--> FUM[c] + FADH2[c]'	Fumarate reductase [ec:1.3.5.4]
R68		'SUC[c] + UQ[c] --> FUM[c] + UQH2[c]'	Succinate dehydrogenase [ec:1.3.5.1]	R68		'SUC[c] + UQ[c] --> FUM[c] + UQH2[c]'	Succinate dehydrogenase [ec:1.3.5.1]	R68		'SUC[c] + UQ[c] --> FUM[c] + UQH2[c]'	Succinate dehydrogenase [ec:1.3.5.1]	R68		'SUC[c] + UQ[c] --> FUM[c] + UQH2[c]'	Succinate dehydrogenase [ec:1.3.5.1]	R68		'SUC[c] + UQ[c] --> FUM[c] + UQH2[c]'	Succinate dehydrogenase [ec:1.3.5.1]
R69		'FUM[c] <--> MAL[c]'	Fumarase [ec:4.2.1.2]	R69		'FUM[c] <--> MAL[c]'	Fumarase [ec:4.2.1.2]	R69		'FUM[c] <--> MAL[c]'	Fumarase [ec:4.2.1.2]	R69		'FUM[c] <--> MAL[c]'	Fumarase [ec:4.2.1.2]	R69		'FUM[c] <--> MAL[c]'	Fumarase [ec:4.2.1.2]
R70		'MAL[c] + NAD[c] <--> OXA[c] + NADH[c]'	Malate dehydrogenase [ec:1.1.1.37]	R70		'MAL[c] + NAD[c] <--> OXA[c] + NADH[c]'	Malate dehydrogenase [ec:1.1.1.37]	R70		'MAL[c] + NAD[c] <--> OXA[c] + NADH[c]'	Malate dehydrogenase [ec:1.1.1.37]	R70		'MAL[c] + NAD[c] <--> OXA[c] + NADH[c]'	Malate dehydrogenase [ec:1.1.1.37]	R70		'MAL[c] + NAD[c] <--> OXA[c] + NADH[c]'	Malate dehydrogenase [ec:1.1.1.37]
R71		'MAL[c] + NADP[c] --> PYR[c] + CO2[c] + NADPH[c]'	Malic enzyme (NADP dependent) [ec:1.1.1.40]	R71		'MAL[c] + NADP[c] --> PYR[c] + CO2[c] + NADPH[c]'	Malic enzyme (NADP dependent) [ec:1.1.1.40]	R71		'MAL[c] + NADP[c] --> PYR[c] + CO2[c] + NADPH[c]'	Malic enzyme (NADP dependent) [ec:1.1.1.40]	R71		'MAL[c] + NADP[c] --> PYR[c] + CO2[c] + NADPH[c]'	Malic enzyme (NADP dependent) [ec:1.1.1.40]	R71		'MAL[c] + NADP[c] --> PYR[c] + CO2[c] + NADPH[c]'	Malic enzyme (NADP dependent) [ec:1.1.1.40]
R72		'ISC[c] --> GLYOX[c] + SUC[c]'	Isocitrate lyase [ec:4.1.3.1]	R72		'ISC[c] --> GLYOX[c] + SUC[c]'	Isocitrate lyase [ec:4.1.3.1]	R72		'ISC[c] --> GLYOX[c] + SUC[c]'	Isocitrate lyase [ec:4.1.3.1]	R72		'ISC[c] --> GLYOX[c] + SUC[c]'	Isocitrate lyase [ec:4.1.3.1]	R72		'ISC[c] --> GLYOX[c] + SUC[c]'	Isocitrate lyase [ec:4.1.3.1]
R73		'GLYOX[c] + AC-CoA[c] --> MAL[c] + H-CoA[c]'	Malate synthase [ec:2.3.3.9]	R73		'GLYOX[c] + AC-CoA[c] --> MAL[c] + H-CoA[c]'	Malate synthase [ec:2.3.3.9]	R73		'GLYOX[c] + AC-CoA[c] --> MAL[c] + H-CoA[c]'	Malate synthase [ec:2.3.3.9]	R73		'GLYOX[c] + AC-CoA[c] --> MAL[c] + H-CoA[c]'	Malate synthase [ec:2.3.3.9]	R73		'GLYOX[c] + AC-CoA[c] --> MAL[c] + H-CoA[c]'	Malate synthase [ec:2.3.3.9]
R74		'AC[c] + H-CoA[c] + ATP[c] --> AC-CoA[c] + AMP[c] + 2 Pi[c]'	Acetyl-CoA synthetase [ec:6.2.1.1]	R74		'AC[c] + H-CoA[c] + ATP[c] --> AC-CoA[c] + AMP[c] + 2 Pi[c]'	Acetyl-CoA synthetase [ec:6.2.1.1]	R74		'AC[c] + H-CoA[c] + ATP[c] --> AC-CoA[c] + AMP[c] + 2 Pi[c]'	Acetyl-CoA synthetase [ec:6.2.1.1]	R74		'AC[c] + H-CoA[c] + ATP[c] --> AC-CoA[c] + AMP[c] + 2 Pi[c]'	Acetyl-CoA synthetase [ec:6.2.1.1]	R74		'AC[c] + H-CoA[c] + ATP[c] --> AC-CoA[c] + AMP[c] + 2 Pi[c]'	Acetyl-CoA synthetase [ec:6.2.1.1]
R75		'2 AC-CoA[c] <--> ACAC-CoA[c] + H-CoA[c]'	Acetoacetyl-CoA thiolase [ec:2.3.1.9]	R75		'2 AC-CoA[c] <--> ACAC-CoA[c] + H-CoA[c]'	Acetoacetyl-CoA thiolase [ec:2.3.1.9]	R75		'2 AC-CoA[c] <--> ACAC-CoA[c] + H-CoA[c]'	Acetoacetyl-CoA thiolase [ec:2.3.1.9]	R75		'2 AC-CoA[c] <--> ACAC-CoA[c] + H-CoA[c]'	Acetoacetyl-CoA thiolase [ec:2.3.1.9]	R75		'2 AC-CoA[c] <--> ACAC-CoA[c] + H-CoA[c]'	Acetoacetyl-CoA thiolase [ec:2.3.1.9]
R76		'AC-CoA[c] + SUC[c] --> AC[c] + SUC-CoA[c]'	Succinyl-CoA:acetate CoA-transferase [ec:2.8.3.18]	R76		'AC-CoA[c] + SUC[c] --> AC[c] + SUC-CoA[c]'	Succinyl-CoA:acetate CoA-transferase [ec:2.8.3.18]	R76		'AC-CoA[c] + SUC[c] --> AC[c] + SUC-CoA[c]'	Succinyl-CoA:acetate CoA-transferase [ec:2.8.3.18]	R76		'AC-CoA[c] + SUC[c] --> AC[c] + SUC-CoA[c]'	Succinyl-CoA:acetate CoA-transferase [ec:2.8.3.18]	R76		'AC-CoA[c] + SUC[c] --> AC[c] + SUC-CoA[c]'	Succinyl-CoA:acetate CoA-transferase [ec:2.8.3.18]
R77		'ACAC[c] + SUC-CoA[c] <--> ACAC-CoA[c] + SUC[c]'	3-Oxoacid CoA-transferase [ec:2.8.3.5]	R77		'ACAC[c] + SUC-CoA[c] <--> ACAC-CoA[c] + SUC[c]'	3-Oxoacid CoA-transferase [ec:2.8.3.5]	R77		'ACAC[c] + SUC-CoA[c] <--> ACAC-CoA[c] + SUC[c]'	3-Oxoacid CoA-transferase [ec:2.8.3.5]	R77		'ACAC[c] + SUC-CoA[c] <--> ACAC-CoA[c] + SUC[c]'	3-Oxoacid CoA-transferase [ec:2.8.3.5]	R77		'ACAC[c] + SUC-CoA[c] <--> ACAC-CoA[c] + SUC[c]'	3-Oxoacid CoA-transferase [ec:2.8.3.5]
R78		'PYR[c] + H-CoA[c] --> AC-CoA[c] + FOR[c]'	Pyruvate formate lyase [ec:2.3.1.54]	R78		'PYR[c] + H-CoA[c] --> AC-CoA[c] + FOR[c]'	Pyruvate formate lyase [ec:2.3.1.54]	R78		'PYR[c] + H-CoA[c] --> AC-CoA[c] + FOR[c]'	Pyruvate formate lyase [ec:2.3.1.54]	R78		'PYR[c] + H-CoA[c] --> AC-CoA[c] + FOR[c]'	Pyruvate formate lyase [ec:2.3.1.54]	R78		'PYR[c] + H-CoA[c] --> AC-CoA[c] + FOR[c]'	Pyruvate formate lyase [ec:2.3.1.54]
R79		'FOR[c] + NAD[c] --> CO2[c] + NADH[c]'	Formate dehydrogenase [ec:1.17.1.9]	R79		'FOR[c] + NAD[c] --> CO2[c] + NADH[c]'	Formate dehydrogenase [ec:1.17.1.9]	R79		'FOR[c] + NAD[c] --> CO2[c] + NADH[c]'	Formate dehydrogenase [ec:1.17.1.9]	R79		'FOR[c] + NAD[c] --> CO2[c] + NADH[c]'	Formate dehydrogenase [ec:1.17.1.9]	R79		'FOR[c] + NAD[c] --> CO2[c] + NADH[c]'	Formate dehydrogenase [ec:1.17.1.9]
R80		'H-CoA[c] + ACP[c] --> AC-CoA[c] + Pi[c]'	Phosphate acetyltransferase [ec:2.3.1.8]	R80		'H-CoA[c] + ACP[c] --> AC-CoA[c] + Pi[c]'	Phosphate acetyltransferase [ec:2.3.1.8]	R80		'H-CoA[c] + ACP[c] --> AC-CoA[c] + Pi[c]'	Phosphate acetyltransferase [ec:2.3.1.8]	R80		'H-CoA[c] + ACP[c] --> AC-CoA[c] + Pi[c]'	Phosphate acetyltransferase [ec:2.3.1.8]	R80		'H-CoA[c] + ACP[c] --> AC-CoA[c] + Pi[c]'	Phosphate acetyltransferase [ec:2.3.1.8]
R81		'ACP[c] + ADP[c] --> AC[c] + ATP[c]'	Acetate kinase [ec:2.7.2.1]	R81		'ACP[c] + ADP[c] --> AC[c] + ATP[c]'	Acetate kinase [ec:2.7.2.1]	R81		'ACP[c] + ADP[c] --> AC[c] + ATP[c]'	Acetate kinase [ec:2.7.2.1]	R81		'ACP[c] + ADP[c] --> AC[c] + ATP[c]'	Acetate kinase [ec:2.7.2.1]	R81		'ACP[c] + ADP[c] --> AC[c] + ATP[c]'	Acetate kinase [ec:2.7.2.1]
R82		'AC-CoA[c] + NADH[c] <--> ACA[c] + NAD[c] + H-CoA[c]'	Acetaldehyde dehydrogenase [ec:1.2.1.10]	R82		'AC-CoA[c] + NADH[c] <--> ACA[c] + NAD[c] + H-CoA[c]'	Acetaldehyde dehydrogenase [ec:1.2.1.10]	R82		'AC-CoA[c] + NADH[c] <--> ACA[c] + NAD[c] + H-CoA[c]'	Acetaldehyde dehydrogenase [ec:1.2.1.10]	R82		'AC-CoA[c] + NADH[c] <--> ACA[c] + NAD[c] + H-CoA[c]'	Acetaldehyde dehydrogenase [ec:1.2.1.10]	R82		'AC-CoA[c] + NADH[c] <--> ACA[c] + NAD[c] + H-CoA[c]'	Acetaldehyde dehydrogenase [ec:1.2.1.10]
R83		'ACA[c] + NAD[c] --> AC[c] + NADH[c]'	Aldehyde dehydrogenase (NAD dependent) [ec:1.2.1.3]	R83		'ACA[c] + NAD[c] --> AC[c] + NADH[c]'	Aldehyde dehydrogenase (NAD dependent) [ec:1.2.1.3]	R83		'ACA[c] + NAD[c] --> AC[c] + NADH[c]'	Aldehyde dehydrogenase (NAD dependent) [ec:1.2.1.3]	R83		'ACA[c] + NAD[c] --> AC[c] + NADH[c]'	Aldehyde dehydrogenase (NAD dependent) [ec:1.2.1.3]	R83		'ACA[c] + NAD[c] --> AC[c] + NADH[c]'	Aldehyde dehydrogenase (NAD dependent) [ec:1.2.1.3]
R84		'ACA[c] + NADH[c] --> ETOH[c] + NAD[c]'	Alcohol dehydrogenase [ec:1.1.1.1]	R84		'ACA[c] + NADH[c] --> ETOH[c] + NAD[c]'	Alcohol dehydrogenase [ec:1.1.1.1]	R84		'ACA[c] + NADH[c] --> ETOH[c] + NAD[c]'	Alcohol dehydrogenase [ec:1.1.1.1]	R84		'ACA[c] + NADH[c] --> ETOH[c] + NAD[c]'	Alcohol dehydrogenase [ec:1.1.1.1]	R84		'ACA[c] + NADH[c] --> ETOH[c] + NAD[c]'	Alcohol dehydrogenase [ec:1.1.1.1]
R85		'PYR[c] + NADH[c] --> LAC[c] + NAD[c]'	Lactate dehydrogenase [ec:1.1.1.27]	R85		'PYR[c] + NADH[c] --> LAC[c] + NAD[c]'	Lactate dehydrogenase [ec:1.1.1.27]	R85		'PYR[c] + NADH[c] --> LAC[c] + NAD[c]'	Lactate dehydrogenase [ec:1.1.1.27]	R85		'PYR[c] + NADH[c] --> LAC[c] + NAD[c]'	Lactate dehydrogenase [ec:1.1.1.27]	R85		'PYR[c] + NADH[c] --> LAC[c] + NAD[c]'	Lactate dehydrogenase [ec:1.1.1.27]
R86		'ACAC[c] --> ACETONE[c] + CO2[c]'	Acetoacetate decarboxylase [ec:4.1.1.4]	R86		'ACAC[c] --> ACETONE[c] + CO2[c]'	Acetoacetate decarboxylase [ec:4.1.1.4]	R86		'ACAC[c] --> ACETONE[c] + CO2[c]'	Acetoacetate decarboxylase [ec:4.1.1.4]	R86		'ACAC[c] --> ACETONE[c] + CO2[c]'	Acetoacetate decarboxylase [ec:4.1.1.4]	R86		'ACAC[c] --> ACETONE[c] + CO2[c]'	Acetoacetate decarboxylase [ec:4.1.1.4]
R87		'ACAC-CoA[c] + NADPH[c] <--> 3-HBut-CoA[c] + NADP[c]'	3-Hydroxyacyl-CoA dehydrogenase [ec:1.1.1.35]	R87		'ACAC-CoA[c] + NADPH[c] <--> 3-HBut-CoA[c] + NADP[c]'	3-Hydroxyacyl-CoA dehydrogenase [ec:1.1.1.35]	R87		'ACAC-CoA[c] + NADPH[c] <--> 3-HBut-CoA[c] + NADP[c]'	3-Hydroxyacyl-CoA dehydrogenase [ec:1.1.1.35]	R87		'ACAC-CoA[c] + NADPH[c] <--> 3-HBut-CoA[c] + NADP[c]'	3-Hydroxyacyl-CoA dehydrogenase [ec:1.1.1.35]	R87		'ACAC-CoA[c] + NADPH[c] <--> 3-HBut-CoA[c] + NADP[c]'	3-Hydroxyacyl-CoA dehydrogenase [ec:1.1.1.35]
R88		'3-HBut-CoA[c] --> PHB[c] + H-CoA[c]'	Poly(3-hydroxybutyrate) synthase [ec:2.3.1.-]	R88		'3-HBut-CoA[c] --> PHB[c] + H-CoA[c]'	Poly(3-hydroxybutyrate) synthase [ec:2.3.1.-]	R88		'3-HBut-CoA[c] --> PHB[c] + H-CoA[c]'	Poly(3-hydroxybutyrate) synthase [ec:2.3.1.-]	R88		'3-HBut-CoA[c] --> PHB[c] + H-CoA[c]'	Poly(3-hydroxybutyrate) synthase [ec:2.3.1.-]	R88		'3-HBut-CoA[c] --> PHB[c] + H-CoA[c]'	Poly(3-hydroxybutyrate) synthase [ec:2.3.1.-]
R89		'PHB[c] + NAD[c] --> ACAC[c] + NADH[c]'	PHA depolymerase [ec:3.1.1.75]	R89		'PHB[c] + NAD[c] --> ACAC[c] + NADH[c]'	PHA depolymerase [ec:3.1.1.75]	R89		'PHB[c] + NAD[c] --> ACAC[c] + NADH[c]'	PHA depolymerase [ec:3.1.1.75]	R89		'PHB[c] + NAD[c] --> ACAC[c] + NADH[c]'	PHA depolymerase [ec:3.1.1.75]	R89		'PHB[c] + NAD[c] --> ACAC[c] + NADH[c]'	PHA depolymerase [ec:3.1.1.75]
R90		'aKG[c] + NADPH[c] + NH3[c] <--> GLU[c] + NADP[c]'	Glutamate dehydrogenase [ec:1.4.1.2]	R90		'aKG[c] + NADPH[c] + NH3[c] <--> GLU[c] + NADP[c]'	Glutamate dehydrogenase [ec:1.4.1.2]	R90		'aKG[c] + NADPH[c] + NH3[c] <--> GLU[c] + NADP[c]'	Glutamate dehydrogenase [ec:1.4.1.2]	R90		'aKG[c] + NADPH[c] + NH3[c] <--> GLU[c] + NADP[c]'	Glutamate dehydrogenase [ec:1.4.1.2]	R90		'aKG[c] + NADPH[c] + NH3[c] <--> GLU[c] + NADP[c]'	Glutamate dehydrogenase [ec:1.4.1.2]
R91		'GLU[c] + NH3[c] + ATP[c] <--> GLN[c] + ADP[c] + Pi[c]'	Glutamine synthase [ec:6.3.1.2]	R91		'GLU[c] + NH3[c] + ATP[c] <--> GLN[c] + ADP[c] + Pi[c]'	Glutamine synthase [ec:6.3.1.2]	R91		'GLU[c] + NH3[c] + ATP[c] <--> GLN[c] + ADP[c] + Pi[c]'	Glutamine synthase [ec:6.3.1.2]	R91		'GLU[c] + NH3[c] + ATP[c] <--> GLN[c] + ADP[c] + Pi[c]'	Glutamine synthase [ec:6.3.1.2]	R91		'GLU[c] + NH3[c] + ATP[c] <--> GLN[c] + ADP[c] + Pi[c]'	Glutamine synthase [ec:6.3.1.2]
R92		'0.021 G6P[c] + 0.007 F6P[c] + 0.09 R5P[c] + 0.036 E4P[c] + 0.013 G3P[c] + 0.15 3-PG[c] + 0.052 PEP[c] + 0.283 PYR[c] + 0.374 AC-CoA[c] + 0.179 OXA[c] + 0.832 GLU[c] + 0.025 GLN[c] + 4.11 ATP[c] + 0.826 NADPH[c] + 0.312 NAD[c] --> BIOMASS[c] + 0.751 aKG[c] + 0.261 CO2[c] + 0.374 H-CoA[c] + 4.11 ADP[c] + 4.479 Pi[c] + 0.826 NADP[c] + 0.312 NADH[c]'	Biomass formation	R92		'0.021 G6P[c] + 0.007 F6P[c] + 0.09 R5P[c] + 0.036 E4P[c] + 0.013 G3P[c] + 0.15 3-PG[c] + 0.052 PEP[c] + 0.283 PYR[c] + 0.374 AC-CoA[c] + 0.179 OXA[c] + 0.832 GLU[c] + 0.025 GLN[c] + 4.11 ATP[c] + 0.826 NADPH[c] + 0.312 NAD[c] --> BIOMASS[c] + 0.751 aKG[c] + 0.261 CO2[c] + 0.374 H-CoA[c] + 4.11 ADP[c] + 4.479 Pi[c] + 0.826 NADP[c] + 0.312 NADH[c]'	Biomass formation	R92		'0.021 G6P[c] + 0.007 F6P[c] + 0.09 R5P[c] + 0.036 E4P[c] + 0.013 G3P[c] + 0.15 3-PG[c] + 0.052 PEP[c] + 0.283 PYR[c] + 0.374 AC-CoA[c] + 0.179 OXA[c] + 0.832 GLU[c] + 0.025 GLN[c] + 4.11 ATP[c] + 0.826 NADPH[c] + 0.312 NAD[c] --> BIOMASS[c] + 0.751 aKG[c] + 0.261 CO2[c] + 0.374 H-CoA[c] + 4.11 ADP[c] + 4.479 Pi[c] + 0.826 NADP[c] + 0.312 NADH[c]'	Biomass formation	R92		'0.021 G6P[c] + 0.007 F6P[c] + 0.09 R5P[c] + 0.036 E4P[c] + 0.013 G3P[c] + 0.15 3-PG[c] + 0.052 PEP[c] + 0.283 PYR[c] + 0.374 AC-CoA[c] + 0.179 OXA[c] + 0.832 GLU[c] + 0.025 GLN[c] + 4.11 ATP[c] + 0.826 NADPH[c] + 0.312 NAD[c] --> BIOMASS[c] + 0.751 aKG[c] + 0.261 CO2[c] + 0.374 H-CoA[c] + 4.11 ADP[c] + 4.479 Pi[c] + 0.826 NADP[c] + 0.312 NADH[c]'	Biomass formation	R92		'0.021 G6P[c] + 0.007 F6P[c] + 0.09 R5P[c] + 0.036 E4P[c] + 0.013 G3P[c] + 0.15 3-PG[c] + 0.052 PEP[c] + 0.283 PYR[c] + 0.374 AC-CoA[c] + 0.179 OXA[c] + 0.832 GLU[c] + 0.025 GLN[c] + 4.11 ATP[c] + 0.826 NADPH[c] + 0.312 NAD[c] --> BIOMASS[c] + 0.751 aKG[c] + 0.261 CO2[c] + 0.374 H-CoA[c] + 4.11 ADP[c] + 4.479 Pi[c] + 0.826 NADP[c] + 0.312 NADH[c]'	Biomass formation
R93		'NADH[c] + FAD[c] --> NAD[c] + FADH2[c]'	Flavin reductase (NAD dependent) [ec:1.5.1.36]	R93		'NADH[c] + FAD[c] --> NAD[c] + FADH2[c]'	Flavin reductase (NAD dependent) [ec:1.5.1.36]	R93		'NADH[c] + FAD[c] --> NAD[c] + FADH2[c]'	Flavin reductase (NAD dependent) [ec:1.5.1.36]	R93		'NADH[c] + FAD[c] --> NAD[c] + FADH2[c]'	Flavin reductase (NAD dependent) [ec:1.5.1.36]	R93		'NADH[c] + FAD[c] --> NAD[c] + FADH2[c]'	Flavin reductase (NAD dependent) [ec:1.5.1.36]
R94		'NADPH[c] + NAD[c] --> NADP[c] + NADH[c]'	NAD(P) transhydrogenase [ec:1.6.1.3]	R94		'NADPH[c] + NAD[c] --> NADP[c] + NADH[c]'	NAD(P) transhydrogenase [ec:1.6.1.3]	R94		'NADPH[c] + NAD[c] --> NADP[c] + NADH[c]'	NAD(P) transhydrogenase [ec:1.6.1.3]	R94		'NADPH[c] + NAD[c] --> NADP[c] + NADH[c]'	NAD(P) transhydrogenase [ec:1.6.1.3]	R94		'NADPH[c] + NAD[c] --> NADP[c] + NADH[c]'	NAD(P) transhydrogenase [ec:1.6.1.3]
R95		'NADH[c] + NADP[c] + H[e] --> NAD[c] + NADPH[c] + H[c]'	NAD(P) transhydrogenase (Re/Si-specific) [ec:1.6.1.2]	R95		'NADH[c] + NADP[c] + H[e] --> NAD[c] + NADPH[c] + H[c]'	NAD(P) transhydrogenase (Re/Si-specific) [ec:1.6.1.2]	R95		'NADH[c] + NADP[c] + H[e] --> NAD[c] + NADPH[c] + H[c]'	NAD(P) transhydrogenase (Re/Si-specific) [ec:1.6.1.2]	R95		'NADH[c] + NADP[c] + H[e] --> NAD[c] + NADPH[c] + H[c]'	NAD(P) transhydrogenase (Re/Si-specific) [ec:1.6.1.2]	R95		'NADH[c] + NADP[c] + H[e] --> NAD[c] + NADPH[c] + H[c]'	NAD(P) transhydrogenase (Re/Si-specific) [ec:1.6.1.2]
R96		'H2[c] + NAD[c] --> NADH[c]'	Hydrogen dehydrogenase [ec:1.12.1.2]	R96		'H2[c] + NAD[c] --> NADH[c]'	Hydrogen dehydrogenase [ec:1.12.1.2]	R96		'H2[c] + NAD[c] --> NADH[c]'	Hydrogen dehydrogenase [ec:1.12.1.2]	R96		'H2[c] + NAD[c] --> NADH[c]'	Hydrogen dehydrogenase [ec:1.12.1.2]	R96		'H2[c] + NAD[c] --> NADH[c]'	Hydrogen dehydrogenase [ec:1.12.1.2]
R97		'UQ[c] + H2[c] --> UQH2[c]'	Hydrogen dehydrogenase [ec:1.12.99.6]	R97		'UQ[c] + H2[c] --> UQH2[c]'	Hydrogen dehydrogenase [ec:1.12.99.6]	R97		'UQ[c] + H2[c] --> UQH2[c]'	Hydrogen dehydrogenase [ec:1.12.99.6]	R97		'UQ[c] + H2[c] --> UQH2[c]'	Hydrogen dehydrogenase [ec:1.12.99.6]	R97		'UQ[c] + H2[c] --> UQH2[c]'	Hydrogen dehydrogenase [ec:1.12.99.6]
R98		'NADH[c] + UQ[c] --> NAD[c] + UQH2[c]'	NADH-quinone oxidoreductase [ec:1.6.5.9]	R98		'NADH[c] + UQ[c] --> NAD[c] + UQH2[c]'	NADH-quinone oxidoreductase [ec:1.6.5.9]	R98		'NADH[c] + UQ[c] --> NAD[c] + UQH2[c]'	NADH-quinone oxidoreductase [ec:1.6.5.9]	R98		'NADH[c] + UQ[c] --> NAD[c] + UQH2[c]'	NADH-quinone oxidoreductase [ec:1.6.5.9]	R98		'NADH[c] + UQ[c] --> NAD[c] + UQH2[c]'	NADH-quinone oxidoreductase [ec:1.6.5.9]
R99		'NADH[c] + UQ[c] + 4 H[c] --> NAD[c] + UQH2[c] + 4 H[e]'	NADH-quinone oxidoreductase [ec:7.1.1.2]	R99		'NADH[c] + UQ[c] + 4 H[c] --> NAD[c] + UQH2[c] + 4 H[e]'	NADH-quinone oxidoreductase [ec:7.1.1.2]	R99		'NADH[c] + UQ[c] + 4 H[c] --> NAD[c] + UQH2[c] + 4 H[e]'	NADH-quinone oxidoreductase [ec:7.1.1.2]	R99		'NADH[c] + UQ[c] + 4 H[c] --> NAD[c] + UQH2[c] + 4 H[e]'	NADH-quinone oxidoreductase [ec:7.1.1.2]	R99		'NADH[c] + UQ[c] + 4 H[c] --> NAD[c] + UQH2[c] + 4 H[e]'	NADH-quinone oxidoreductase [ec:7.1.1.2]
R100		'UQH2[c] + 4 H[c] + 0.5 O2[c] --> UQ[c] + 4 H[e]'	Cytochrome bd oxidase [ec:7.1.1.7]	R100		'UQH2[c] + 4 H[c] + 0.5 O2[c] --> UQ[c] + 4 H[e]'	Cytochrome bd oxidase [ec:7.1.1.7]	R100		'UQH2[c] + 4 H[c] + 0.5 O2[c] --> UQ[c] + 4 H[e]'	Cytochrome bd oxidase [ec:7.1.1.7]	R100		'UQH2[c] + 4 H[c] + 0.5 O2[c] --> UQ[c] + 4 H[e]'	Cytochrome bd oxidase [ec:7.1.1.7]	R100		'UQH2[c] + 4 H[c] + 0.5 O2[c] --> UQ[c] + 4 H[e]'	Cytochrome bd oxidase [ec:7.1.1.7]
R101		'UQH2[c] + 2 H[c] + 0.5 O2[c] --> UQ[c] + 2 H[e]'	Cytochrome bo oxidase [ec:7.1.1.3]	R101		'UQH2[c] + 2 H[c] + 0.5 O2[c] --> UQ[c] + 2 H[e]'	Cytochrome bo oxidase [ec:7.1.1.3]	R101		'UQH2[c] + 2 H[c] + 0.5 O2[c] --> UQ[c] + 2 H[e]'	Cytochrome bo oxidase [ec:7.1.1.3]	R101		'UQH2[c] + 2 H[c] + 0.5 O2[c] --> UQ[c] + 2 H[e]'	Cytochrome bo oxidase [ec:7.1.1.3]	R101		'UQH2[c] + 2 H[c] + 0.5 O2[c] --> UQ[c] + 2 H[e]'	Cytochrome bo oxidase [ec:7.1.1.3]
R102		'ADP[c] + 4 H[e] + Pi[c] --> ATP[c] + 4 H[c]'	ATP synthase [ec:3.6.3.14]	R102		'ADP[c] + 4 H[e] + Pi[c] --> ATP[c] + 4 H[c]'	ATP synthase [ec:3.6.3.14]	R102		'ADP[c] + 4 H[e] + Pi[c] --> ATP[c] + 4 H[c]'	ATP synthase [ec:3.6.3.14]	R102		'ADP[c] + 4 H[e] + Pi[c] --> ATP[c] + 4 H[c]'	ATP synthase [ec:3.6.3.14]	R102		'ADP[c] + 4 H[e] + Pi[c] --> ATP[c] + 4 H[c]'	ATP synthase [ec:3.6.3.14]
R103		'ADP[c] + 3 H[e] + Pi[c] <-- ATP[c] + 3 H[c]'	reverse ATP synthase (proton pump) [ec:3.6.3.14]	R103		'ADP[c] + 3 H[e] + Pi[c] <-- ATP[c] + 3 H[c]'	reverse ATP synthase (proton pump) [ec:3.6.3.14]	R103		'ADP[c] + 3 H[e] + Pi[c] <-- ATP[c] + 3 H[c]'	reverse ATP synthase (proton pump) [ec:3.6.3.14]	R103		'ADP[c] + 3 H[e] + Pi[c] <-- ATP[c] + 3 H[c]'	reverse ATP synthase (proton pump) [ec:3.6.3.14]	R103		'ADP[c] + 3 H[e] + Pi[c] <-- ATP[c] + 3 H[c]'	reverse ATP synthase (proton pump) [ec:3.6.3.14]
R104		'AMP[c] + ATP[c] --> 2 ADP[c]'	Adenylate kinase [ec:2.7.4.3]	R104		'AMP[c] + ATP[c] --> 2 ADP[c]'	Adenylate kinase [ec:2.7.4.3]	R104		'AMP[c] + ATP[c] --> 2 ADP[c]'	Adenylate kinase [ec:2.7.4.3]	R104		'AMP[c] + ATP[c] --> 2 ADP[c]'	Adenylate kinase [ec:2.7.4.3]	R104		'AMP[c] + ATP[c] --> 2 ADP[c]'	Adenylate kinase [ec:2.7.4.3]
R105		'PHB[c] --> P-3HB[c]'	P3HB accumulation	R105		'PHB[c] --> P-3HB[c]'	P3HB accumulation	R105		'PHB[c] --> P-3HB[c]'	P3HB accumulation	R105		'PHB[c] --> P-3HB[c]'	P3HB accumulation	R105		'PHB[c] --> P-3HB[c]'	P3HB accumulation
	};				};				};				};				};
	mnet = CalculateFluxModes(ReactionFormulas,CreateFluxModeOpts('parse-only',true));				mnet = CalculateFluxModes(ReactionFormulas,CreateFluxModeOpts('parse-only',true));				mnet = CalculateFluxModes(ReactionFormulas,CreateFluxModeOpts('parse-only',true));				mnet = CalculateFluxModes(ReactionFormulas,CreateFluxModeOpts('parse-only',true));				mnet = CalculateFluxModes(ReactionFormulas,CreateFluxModeOpts('parse-only',true));

## Sheet: P4HB
	C. necator on Fructose + CO2				C. necator on Glycerol + CO2				C. necator on Acetate + CO2				C. necator on Formate + CO2				C. necator on CO2 + H2
RxN		Equation	Function / Enzyme	RxN		Equation	Function / Enzyme	RxN		Equation	Function / Enzyme	RxN		Equation	Function / Enzyme	RxN		Equation	Function / Enzyme
R1	ReactionFormulas = {	'--> CO2[e]'	Carbondioxide in	R1	ReactionFormulas = {	'--> CO2[e]'	Carbondioxide in	R1	ReactionFormulas = {	'--> CO2[e]'	Carbondioxide in	R1	ReactionFormulas = {	'--> CO2[e]'	Carbondioxide in	R1	ReactionFormulas = {	'--> CO2[e]'	Carbondioxide in
R2		'--> FRC[e]'	Fructose in	R2		'--> GLY[e]'	Fructose in	R2		'--> AC[e]'	Fructose in	R2		'--> FOR[e]'	Fructose in	R2		'--> H2[e]'	Hydrogen in
R3		'--> NH3[e]'	Ammonia in	R3		'--> NH3[e]'	Ammonia in	R3		'--> NH3[e]'	Ammonia in	R3		'--> NH3[e]'	Ammonia in	R3		'--> NH3[e]'	Ammonia in
R4		'--> O2[e]'	Oxygen in	R4		'--> O2[e]'	Oxygen in	R4		'--> O2[e]'	Oxygen in	R4		'--> O2[e]'	Oxygen in	R4		'--> O2[e]'	Oxygen in
R5		'CO2[e] -->'	Carbondioxide out	R5		'CO2[e] -->'	Carbondioxide out	R5		'CO2[e] -->'	Carbondioxide out	R5		'CO2[e] -->'	Carbondioxide out	R5		'CO2[e] -->'	Carbondioxide out
R6		'FOR[e] -->'	Formate out	R6		'FOR[e] -->'	Formate out	R6		'FOR[e] -->'	Formate out	R6		'FOR[e] -->'	Formate out	R6		'FOR[e] -->'	Formate out
R7		'AC[e] -->'	Acetate out	R7		'AC[e] -->'	Acetate out	R7		'AC[e] -->'	Acetate out	R7		'AC[e] -->'	Acetate out	R7		'AC[e] -->'	Acetate out
R8		'ETOH[e] -->'	Ethanol out	R8		'ETOH[e] -->'	Ethanol out	R8		'ETOH[e] -->'	Ethanol out	R8		'ETOH[e] -->'	Ethanol out	R8		'ETOH[e] -->'	Ethanol out
R9		'LAC[e] -->'	Lactate out	R9		'LAC[e] -->'	Lactate out	R9		'LAC[e] -->'	Lactate out	R9		'LAC[e] -->'	Lactate out	R9		'LAC[e] -->'	Lactate out
R10		'ACETONE[e] -->'	Acetone out	R10		'ACETONE[e] -->'	Acetone out	R10		'ACETONE[e] -->'	Acetone out	R10		'ACETONE[e] -->'	Acetone out	R10		'ACETONE[e] -->'	Acetone out
R11		'SUC[e] -->'	Succinate out	R11		'SUC[e] -->'	Succinate out	R11		'SUC[e] -->'	Succinate out	R11		'SUC[e] -->'	Succinate out	R11		'SUC[e] -->'	Succinate out
R12		'PHB[e] -->'	Polyhydroxybutyrate out	R12		'PHB[e] -->'	Polyhydroxybutyrate out	R12		'PHB[e] -->'	Polyhydroxybutyrate out	R12		'PHB[e] -->'	Polyhydroxybutyrate out	R12		'PHB[e] -->'	Polyhydroxybutyrate out
R13		'BIOMASS[e] -->'	Biomass out	R13		'BIOMASS[e] -->'	Biomass out	R13		'BIOMASS[e] -->'	Biomass out	R13		'BIOMASS[e] -->'	Biomass out	R13		'BIOMASS[e] -->'	Biomass out
R14		'PRODUCT[e] -->'	Product out	R14		'PRODUCT[e] -->'	Product out	R14		'PRODUCT[e] -->'	Product out	R14		'PRODUCT[e] -->'	Product out	R14		'PRODUCT[e] -->'	Product out
R15		'FOR[c] + H[c] + 0.3 ATP[c] --> FOR[e] + H[e] + 0.3 ADP[c] + 0.3 Pi[c]'	Formate export by ABC transporter	R15		'FOR[c] + H[c] + 0.3 ATP[c] --> FOR[e] + H[e] + 0.3 ADP[c] + 0.3 Pi[c]'	Formate export by ABC transporter	R15		'FOR[c] + H[c] + 0.3 ATP[c] --> FOR[e] + H[e] + 0.3 ADP[c] + 0.3 Pi[c]'	Formate export by ABC transporter	R15		'FOR[c] + H[c] <-- FOR[e] + H[e]'	Formate export by ABC transporter	R15		'FOR[c] + H[c] + 0.3 ATP[c] --> FOR[e] + H[e] + 0.3 ADP[c] + 0.3 Pi[c]'	Formate export by ABC transporter
R16		'AC[c] + H[c] + 0.3 ATP[c] --> AC[e] + H[e] + 0.3 ADP[c] + 0.3 Pi[c]'	Acetate export by ABC transporter	R16		'AC[c] + H[c] + 0.3 ATP[c] --> AC[e] + H[e] + 0.3 ADP[c] + 0.3 Pi[c]'	Acetate export by ABC transporter	R16		'AC[c] + H[c] <-- AC[e] + H[e]'	Acetate export by ABC transporter	R16		'AC[c] + H[c] + 0.3 ATP[c] --> AC[e] + H[e] + 0.3 ADP[c] + 0.3 Pi[c]'	Acetate export by ABC transporter	R16		'AC[c] + H[c] + 0.3 ATP[c] --> AC[e] + H[e] + 0.3 ADP[c] + 0.3 Pi[c]'	Acetate export by ABC transporter
R17		'ETOH[c] --> ETOH[e]'	Ethanol export by diffusion	R17		'ETOH[c] --> ETOH[e]'	Ethanol export by diffusion	R17		'ETOH[c] --> ETOH[e]'	Ethanol export by diffusion	R17		'ETOH[c] --> ETOH[e]'	Ethanol export by diffusion	R17		'ETOH[c] --> ETOH[e]'	Ethanol export by diffusion
R18		'LAC[c] + H[c] + 0.3 ATP[c] --> LAC[e] + H[e] + 0.3 ADP[c] + 0.3 Pi[c]'	Lactate export by ABC transporter	R18		'LAC[c] + H[c] + 0.3 ATP[c] --> LAC[e] + H[e] + 0.3 ADP[c] + 0.3 Pi[c]'	Lactate export by ABC transporter	R18		'LAC[c] + H[c] + 0.3 ATP[c] --> LAC[e] + H[e] + 0.3 ADP[c] + 0.3 Pi[c]'	Lactate export by ABC transporter	R18		'LAC[c] + H[c] + 0.3 ATP[c] --> LAC[e] + H[e] + 0.3 ADP[c] + 0.3 Pi[c]'	Lactate export by ABC transporter	R18		'LAC[c] + H[c] + 0.3 ATP[c] --> LAC[e] + H[e] + 0.3 ADP[c] + 0.3 Pi[c]'	Lactate export by ABC transporter
R19		'ACETONE[c] --> ACETONE[e]'	Acetone export by diffusion	R19		'ACETONE[c] --> ACETONE[e]'	Acetone export by diffusion	R19		'ACETONE[c] --> ACETONE[e]'	Acetone export by diffusion	R19		'ACETONE[c] --> ACETONE[e]'	Acetone export by diffusion	R19		'ACETONE[c] --> ACETONE[e]'	Acetone export by diffusion
R20		'SUC[c] + 2 H[c] + 0.6 ATP[c] --> SUC[e] + 2 H[e] + 0.6 ADP[c] + 0.6 Pi[c]'	Succinate export by ABC transporter	R20		'SUC[c] + 2 H[c] + 0.6 ATP[c] --> SUC[e] + 2 H[e] + 0.6 ADP[c] + 0.6 Pi[c]'	Succinate export by ABC transporter	R20		'SUC[c] + 2 H[c] + 0.6 ATP[c] --> SUC[e] + 2 H[e] + 0.6 ADP[c] + 0.6 Pi[c]'	Succinate export by ABC transporter	R20		'SUC[c] + 2 H[c] + 0.6 ATP[c] --> SUC[e] + 2 H[e] + 0.6 ADP[c] + 0.6 Pi[c]'	Succinate export by ABC transporter	R20		'SUC[c] + 2 H[c] + 0.6 ATP[c] --> SUC[e] + 2 H[e] + 0.6 ADP[c] + 0.6 Pi[c]'	Succinate export by ABC transporter
R21		'BIOMASS[c] --> BIOMASS[e]'	Growth	R21		'BIOMASS[c] --> BIOMASS[e]'	Growth	R21		'BIOMASS[c] --> BIOMASS[e]'	Growth	R21		'BIOMASS[c] --> BIOMASS[e]'	Growth	R21		'BIOMASS[c] --> BIOMASS[e]'	Growth
R22		'P-4HB[c] --> PRODUCT[e]'	Product formation	R22		'P-4HB[c] --> PRODUCT[e]'	Product formation	R22		'P-4HB[c] --> PRODUCT[e]'	Product formation	R22		'P-4HB[c] --> PRODUCT[e]'	Product formation	R22		'P-4HB[c] --> PRODUCT[e]'	Product formation
R23		'O2[e] --> O2[c]'	Oxygen import by diffusion	R23		'O2[e] --> O2[c]'	Oxygen import by diffusion	R23		'O2[e] --> O2[c]'	Oxygen import by diffusion	R23		'O2[e] --> O2[c]'	Oxygen import by diffusion	R23		'O2[e] --> O2[c]'	Oxygen import by diffusion
R24		'NH3[e] --> NH3[c]'	Ammonia import by diffusion	R24		'NH3[e] --> NH3[c]'	Ammonia import by diffusion	R24		'NH3[e] --> NH3[c]'	Ammonia import by diffusion	R24		'NH3[e] --> NH3[c]'	Ammonia import by diffusion	R24		'NH3[e] --> NH3[c]'	Ammonia import by diffusion
R25		'H2[e] --> H2[c]'	Hydrogen import by diffusion	R25		'H2[e] --> H2[c]'	Hydrogen import by diffusion	R25		'H2[e] --> H2[c]'	Hydrogen import by diffusion	R25		'H2[e] --> H2[c]'	Hydrogen import by diffusion	R25		'H2[e] --> H2[c]'	Hydrogen import by diffusion
R26		'CO2[e] <--> CO2[c]'	Carbondioxide import by diffusion	R26		'CO2[e] <--> CO2[c]'	Carbondioxide import by diffusion	R26		'CO2[e] <--> CO2[c]'	Carbondioxide import by diffusion	R26		'CO2[e] <--> CO2[c]'	Carbondioxide import by diffusion	R26		'CO2[e] <--> CO2[c]'	Carbondioxide exchange by diffusion
R27		'FRC[e] + PEP[c] --> F6P[c] + PYR[c]'	PTS [ec:2.7.1.69]	R27		'FRC[e] + PEP[c] --> F6P[c] + PYR[c]'	PTS [ec:2.7.1.69]	R27		'FRC[e] + PEP[c] --> F6P[c] + PYR[c]'	PTS [ec:2.7.1.69]	R27		'FRC[e] + PEP[c] --> F6P[c] + PYR[c]'	PTS [ec:2.7.1.69]	R27		'FRC[e] + PEP[c] --> F6P[c] + PYR[c]'	PTS [ec:2.7.1.69]
R28		'GLY[e] + ATP[c] --> ADP[c] + GLY3P[c]'	Glycerol kinase [ec:2.7.1.30]	R28		'GLY[e] + ATP[c] --> ADP[c] + GLY3P[c]'	Glycerol kinase [ec:2.7.1.30]	R28		'GLY[e] + ATP[c] --> ADP[c] + GLY3P[c]'	Glycerol kinase [ec:2.7.1.30]	R28		'GLY[e] + ATP[c] --> ADP[c] + GLY3P[c]'	Glycerol kinase [ec:2.7.1.30]	R28		'GLY[e] + ATP[c] --> ADP[c] + GLY3P[c]'	Glycerol kinase [ec:2.7.1.30]
R29		'G6P[c] + NADP[c] --> 6-PG-lac[c] + NADPH[c]'	Glucose-6-phosphate dehydrogenase [ec:1.1.1.49]	R29		'G6P[c] + NADP[c] --> 6-PG-lac[c] + NADPH[c]'	Glucose-6-phosphate dehydrogenase [ec:1.1.1.49]	R29		'G6P[c] + NADP[c] --> 6-PG-lac[c] + NADPH[c]'	Glucose-6-phosphate dehydrogenase [ec:1.1.1.49]	R29		'G6P[c] + NADP[c] --> 6-PG-lac[c] + NADPH[c]'	Glucose-6-phosphate dehydrogenase [ec:1.1.1.49]	R29		'G6P[c] + NADP[c] --> 6-PG-lac[c] + NADPH[c]'	Glucose-6-phosphate dehydrogenase [ec:1.1.1.49]
R30		'6-PG-lac[c] --> 6-PG[c]'	6-phosphogluconolactonase [ec:3.1.1.31]	R30		'6-PG-lac[c] --> 6-PG[c]'	6-phosphogluconolactonase [ec:3.1.1.31]	R30		'6-PG-lac[c] --> 6-PG[c]'	6-phosphogluconolactonase [ec:3.1.1.31]	R30		'6-PG-lac[c] --> 6-PG[c]'	6-phosphogluconolactonase [ec:3.1.1.31]	R30		'6-PG-lac[c] --> 6-PG[c]'	6-phosphogluconolactonase [ec:3.1.1.31]
R31		'6-PG[c] --> KDPG[c]'	6-phosphogluconate dehydratase [ec:4.2.1.12]	R31		'6-PG[c] --> KDPG[c]'	6-phosphogluconate dehydratase [ec:4.2.1.12]	R31		'6-PG[c] --> KDPG[c]'	6-phosphogluconate dehydratase [ec:4.2.1.12]	R31		'6-PG[c] --> KDPG[c]'	6-phosphogluconate dehydratase [ec:4.2.1.12]	R31		'6-PG[c] --> KDPG[c]'	6-phosphogluconate dehydratase [ec:4.2.1.12]
R32		'KDPG[c] --> G3P[c] + PYR[c]'	2-keto-3-deoxy-6-phosphogluconate aldolase [ec:4.1.2.14]	R32		'KDPG[c] --> G3P[c] + PYR[c]'	2-keto-3-deoxy-6-phosphogluconate aldolase [ec:4.1.2.14]	R32		'KDPG[c] --> G3P[c] + PYR[c]'	2-keto-3-deoxy-6-phosphogluconate aldolase [ec:4.1.2.14]	R32		'KDPG[c] --> G3P[c] + PYR[c]'	2-keto-3-deoxy-6-phosphogluconate aldolase [ec:4.1.2.14]	R32		'KDPG[c] --> G3P[c] + PYR[c]'	2-keto-3-deoxy-6-phosphogluconate aldolase [ec:4.1.2.14]
R33		'6-PG[c] + NADP[c] --> Ril5P[c] + NADPH[c] + CO2[c]'	6-phosphogluconate dehydrogenase [ec:1.1.1.44]	R33		'6-PG[c] + NADP[c] --> Ril5P[c] + NADPH[c] + CO2[c]'	6-phosphogluconate dehydrogenase [ec:1.1.1.44]	R33		'6-PG[c] + NADP[c] --> Ril5P[c] + NADPH[c] + CO2[c]'	6-phosphogluconate dehydrogenase [ec:1.1.1.44]	R33		'6-PG[c] + NADP[c] --> Ril5P[c] + NADPH[c] + CO2[c]'	6-phosphogluconate dehydrogenase [ec:1.1.1.44]	R33		'6-PG[c] + NADP[c] --> Ril5P[c] + NADPH[c] + CO2[c]'	6-phosphogluconate dehydrogenase [ec:1.1.1.44]
R34		'Ril5P[c] + ATP[c] --> Ril15BP[c] + ADP[c]'	Phosphoribulokinase [ec:2.7.1.19]	R34		'Ril5P[c] + ATP[c] --> Ril15BP[c] + ADP[c]'	Phosphoribulokinase [ec:2.7.1.19]	R34		'Ril5P[c] + ATP[c] --> Ril15BP[c] + ADP[c]'	Phosphoribulokinase [ec:2.7.1.19]	R34		'Ril5P[c] + ATP[c] --> Ril15BP[c] + ADP[c]'	Phosphoribulokinase [ec:2.7.1.19]	R34		'Ril5P[c] + ATP[c] --> Ril15BP[c] + ADP[c]'	Phosphoribulokinase [ec:2.7.1.19]
R35		'5 Ril15BP[c] + 4 CO2[c] + 1 O2[c] --> 9 3-PG[c] + 1 PG[c]'	Ribulose-1,5-bisphosphate carboxylase/oxygenase (RuBisCO) "best case" [ec:4.1.1.39]	R35		'5 Ril15BP[c] + 4 CO2[c] + 1 O2[c] --> 9 3-PG[c] + 1 PG[c]'	Ribulose-1,5-bisphosphate carboxylase/oxygenase (RuBisCO) "best case" [ec:4.1.1.39]	R35		'5 Ril15BP[c] + 4 CO2[c] + 1 O2[c] --> 9 3-PG[c] + 1 PG[c]'	Ribulose-1,5-bisphosphate carboxylase/oxygenase (RuBisCO) "best case" [ec:4.1.1.39]	R35		'5 Ril15BP[c] + 4 CO2[c] + 1 O2[c] --> 9 3-PG[c] + 1 PG[c]'	Ribulose-1,5-bisphosphate carboxylase/oxygenase (RuBisCO) "best case" [ec:4.1.1.39]	R35		'5 Ril15BP[c] + 4 CO2[c] + 1 O2[c] --> 9 3-PG[c] + 1 PG[c]'	Ribulose-1,5-bisphosphate carboxylase/oxygenase (RuBisCO) "best case" [ec:4.1.1.39]
R36		'4 Ril15BP[c] + 3 CO2[c] + 1 O2[c] --> 7 3-PG[c] + 1 PG[c]'	Ribulose-1,5-bisphosphate carboxylase/oxygenase (RuBisCO) "worst case" [ec:4.1.1.39]	R36		'4 Ril15BP[c] + 3 CO2[c] + 1 O2[c] --> 7 3-PG[c] + 1 PG[c]'	Ribulose-1,5-bisphosphate carboxylase/oxygenase (RuBisCO) "worst case" [ec:4.1.1.39]	R36		'4 Ril15BP[c] + 3 CO2[c] + 1 O2[c] --> 7 3-PG[c] + 1 PG[c]'	Ribulose-1,5-bisphosphate carboxylase/oxygenase (RuBisCO) "worst case" [ec:4.1.1.39]	R36		'4 Ril15BP[c] + 3 CO2[c] + 1 O2[c] --> 7 3-PG[c] + 1 PG[c]'	Ribulose-1,5-bisphosphate carboxylase/oxygenase (RuBisCO) "worst case" [ec:4.1.1.39]	R36		'4 Ril15BP[c] + 3 CO2[c] + 1 O2[c] --> 7 3-PG[c] + 1 PG[c]'	Ribulose-1,5-bisphosphate carboxylase/oxygenase (RuBisCO) "worst case" [ec:4.1.1.39]
R37		'PG[c] --> GA[c] + Pi[c]'	2-phosphoglycolate phosphohydrolase [ec:3.1.3.18]	R37		'PG[c] --> GA[c] + Pi[c]'	2-phosphoglycolate phosphohydrolase [ec:3.1.3.18]	R37		'PG[c] --> GA[c] + Pi[c]'	2-phosphoglycolate phosphohydrolase [ec:3.1.3.18]	R37		'PG[c] --> GA[c] + Pi[c]'	2-phosphoglycolate phosphohydrolase [ec:3.1.3.18]	R37		'PG[c] --> GA[c] + Pi[c]'	2-phosphoglycolate phosphohydrolase [ec:3.1.3.18]
R38		'2 GA[c] + O2[c] --> 2 GLYOX[c]'	Glycolate dehydrogenase [ec:1.1.99.14]	R38		'2 GA[c] + O2[c] --> 2 GLYOX[c]'	Glycolate dehydrogenase [ec:1.1.99.14]	R38		'2 GA[c] + O2[c] --> 2 GLYOX[c]'	Glycolate dehydrogenase [ec:1.1.99.14]	R38		'2 GA[c] + O2[c] --> 2 GLYOX[c]'	Glycolate dehydrogenase [ec:1.1.99.14]	R38		'2 GA[c] + O2[c] --> 2 GLYOX[c]'	Glycolate dehydrogenase [ec:1.1.99.14]
R39		'2 GLYOX[c] --> TS[c] + CO2[c]'	Tartronate-semialdehyde synthase [ec:4.1.1.47]	R39		'2 GLYOX[c] --> TS[c] + CO2[c]'	Tartronate-semialdehyde synthase [ec:4.1.1.47]	R39		'2 GLYOX[c] --> TS[c] + CO2[c]'	Tartronate-semialdehyde synthase [ec:4.1.1.47]	R39		'2 GLYOX[c] --> TS[c] + CO2[c]'	Tartronate-semialdehyde synthase [ec:4.1.1.47]	R39		'2 GLYOX[c] --> TS[c] + CO2[c]'	Tartronate-semialdehyde synthase [ec:4.1.1.47]
R40		'TS[c] + NADH[c] --> Glycerate[c] + NAD[c]'	2-hydroxy-3-oxopropionate reductase [ec:1.1.1.60]	R40		'TS[c] + NADH[c] --> Glycerate[c] + NAD[c]'	2-hydroxy-3-oxopropionate reductase [ec:1.1.1.60]	R40		'TS[c] + NADH[c] --> Glycerate[c] + NAD[c]'	2-hydroxy-3-oxopropionate reductase [ec:1.1.1.60]	R40		'TS[c] + NADH[c] --> Glycerate[c] + NAD[c]'	2-hydroxy-3-oxopropionate reductase [ec:1.1.1.60]	R40		'TS[c] + NADH[c] --> Glycerate[c] + NAD[c]'	2-hydroxy-3-oxopropionate reductase [ec:1.1.1.60]
R41		'Glycerate[c] + ATP[c] --> 2-PG[c] + ADP[c]'	Glycerate 2-kinase [ec:2.7.1.165]	R41		'Glycerate[c] + ATP[c] --> 2-PG[c] + ADP[c]'	Glycerate 2-kinase [ec:2.7.1.165]	R41		'Glycerate[c] + ATP[c] --> 2-PG[c] + ADP[c]'	Glycerate 2-kinase [ec:2.7.1.165]	R41		'Glycerate[c] + ATP[c] --> 2-PG[c] + ADP[c]'	Glycerate 2-kinase [ec:2.7.1.165]	R41		'Glycerate[c] + ATP[c] --> 2-PG[c] + ADP[c]'	Glycerate 2-kinase [ec:2.7.1.165]
R42		'Ril5P[c] <--> R5P[c]'	Ribose-5-phosphate isomerase [ec:5.3.1.6]	R42		'Ril5P[c] <--> R5P[c]'	Ribose-5-phosphate isomerase [ec:5.3.1.6]	R42		'Ril5P[c] <--> R5P[c]'	Ribose-5-phosphate isomerase [ec:5.3.1.6]	R42		'Ril5P[c] <--> R5P[c]'	Ribose-5-phosphate isomerase [ec:5.3.1.6]	R42		'Ril5P[c] <--> R5P[c]'	Ribose-5-phosphate isomerase [ec:5.3.1.6]
R43		'Ril5P[c] <--> X5P[c]'	Ribulose-phosphate 3-epimerase [ec:5.1.3.1]	R43		'Ril5P[c] <--> X5P[c]'	Ribulose-phosphate 3-epimerase [ec:5.1.3.1]	R43		'Ril5P[c] <--> X5P[c]'	Ribulose-phosphate 3-epimerase [ec:5.1.3.1]	R43		'Ril5P[c] <--> X5P[c]'	Ribulose-phosphate 3-epimerase [ec:5.1.3.1]	R43		'Ril5P[c] <--> X5P[c]'	Ribulose-phosphate 3-epimerase [ec:5.1.3.1]
R44		'R5P[c] + X5P[c] <--> G3P[c] + S7P[c]'	Transketolase [ec:2.2.1.1]	R44		'R5P[c] + X5P[c] <--> G3P[c] + S7P[c]'	Transketolase [ec:2.2.1.1]	R44		'R5P[c] + X5P[c] <--> G3P[c] + S7P[c]'	Transketolase [ec:2.2.1.1]	R44		'R5P[c] + X5P[c] <--> G3P[c] + S7P[c]'	Transketolase [ec:2.2.1.1]	R44		'R5P[c] + X5P[c] <--> G3P[c] + S7P[c]'	Transketolase [ec:2.2.1.1]
R45		'G3P[c] + S7P[c] <--> E4P[c] + F6P[c]'	Transaldolase [ec:2.2.1.2]	R45		'G3P[c] + S7P[c] <--> E4P[c] + F6P[c]'	Transaldolase [ec:2.2.1.2]	R45		'G3P[c] + S7P[c] <--> E4P[c] + F6P[c]'	Transaldolase [ec:2.2.1.2]	R45		'G3P[c] + S7P[c] <--> E4P[c] + F6P[c]'	Transaldolase [ec:2.2.1.2]	R45		'G3P[c] + S7P[c] <--> E4P[c] + F6P[c]'	Transaldolase [ec:2.2.1.2]
R46		'X5P[c] + E4P[c] <--> F6P[c] + G3P[c]'	Transketolase [ec:2.2.1.1]	R46		'X5P[c] + E4P[c] <--> F6P[c] + G3P[c]'	Transketolase [ec:2.2.1.1]	R46		'X5P[c] + E4P[c] <--> F6P[c] + G3P[c]'	Transketolase [ec:2.2.1.1]	R46		'X5P[c] + E4P[c] <--> F6P[c] + G3P[c]'	Transketolase [ec:2.2.1.1]	R46		'X5P[c] + E4P[c] <--> F6P[c] + G3P[c]'	Transketolase [ec:2.2.1.1]
R47		'G6P[c] <--> F6P[c]'	Glucose-6-phosphate isomerase [ec:5.3.1.9]	R47		'G6P[c] <--> F6P[c]'	Glucose-6-phosphate isomerase [ec:5.3.1.9]	R47		'G6P[c] <--> F6P[c]'	Glucose-6-phosphate isomerase [ec:5.3.1.9]	R47		'G6P[c] <--> F6P[c]'	Glucose-6-phosphate isomerase [ec:5.3.1.9]	R47		'G6P[c] <--> F6P[c]'	Glucose-6-phosphate isomerase [ec:5.3.1.9]
R48		'F16BP[c] --> F6P[c] + Pi[c]'	Fructose-bisphosphatase [ec:3.1.3.11]	R48		'F16BP[c] --> F6P[c] + Pi[c]'	Fructose-bisphosphatase [ec:3.1.3.11]	R48		'F16BP[c] --> F6P[c] + Pi[c]'	Fructose-bisphosphatase [ec:3.1.3.11]	R48		'F16BP[c] --> F6P[c] + Pi[c]'	Fructose-bisphosphatase [ec:3.1.3.11]	R48		'F16BP[c] --> F6P[c] + Pi[c]'	Fructose-bisphosphatase [ec:3.1.3.11]
R49		'F16BP[c] <--> G3P[c] + DHAP[c]'	Fructose-bisphosphate aldolase [ec:4.1.2.13]	R49		'F16BP[c] <--> G3P[c] + DHAP[c]'	Fructose-bisphosphate aldolase [ec:4.1.2.13]	R49		'F16BP[c] <--> G3P[c] + DHAP[c]'	Fructose-bisphosphate aldolase [ec:4.1.2.13]	R49		'F16BP[c] <--> G3P[c] + DHAP[c]'	Fructose-bisphosphate aldolase [ec:4.1.2.13]	R49		'F16BP[c] <--> G3P[c] + DHAP[c]'	Fructose-bisphosphate aldolase [ec:4.1.2.13]
R50		'GLY3P[c] + NAD[c] --> DHAP[c] + NADH[c]'	Glycerol-3-phosphate dehydrogenase [ec:1.1.1.8]	R50		'GLY3P[c] + NAD[c] --> DHAP[c] + NADH[c]'	Glycerol-3-phosphate dehydrogenase [ec:1.1.1.8]	R50		'GLY3P[c] + NAD[c] --> DHAP[c] + NADH[c]'	Glycerol-3-phosphate dehydrogenase [ec:1.1.1.8]	R50		'GLY3P[c] + NAD[c] --> DHAP[c] + NADH[c]'	Glycerol-3-phosphate dehydrogenase [ec:1.1.1.8]	R50		'GLY3P[c] + NAD[c] --> DHAP[c] + NADH[c]'	Glycerol-3-phosphate dehydrogenase [ec:1.1.1.8]
R51		'DHAP[c] <--> G3P[c]'	Triose-phosphate isomerase [ec:5.3.1.1]	R51		'DHAP[c] <--> G3P[c]'	Triose-phosphate isomerase [ec:5.3.1.1]	R51		'DHAP[c] <--> G3P[c]'	Triose-phosphate isomerase [ec:5.3.1.1]	R51		'DHAP[c] <--> G3P[c]'	Triose-phosphate isomerase [ec:5.3.1.1]	R51		'DHAP[c] <--> G3P[c]'	Triose-phosphate isomerase [ec:5.3.1.1]
R52		'G3P[c] + NAD[c] + Pi[c] <--> BPG[c] + NADH[c]'	Glyceraldehyde 3-phosphate dehydrogenase [ec:1.2.1.12]	R52		'G3P[c] + NAD[c] + Pi[c] <--> BPG[c] + NADH[c]'	Glyceraldehyde 3-phosphate dehydrogenase [ec:1.2.1.12]	R52		'G3P[c] + NAD[c] + Pi[c] <--> BPG[c] + NADH[c]'	Glyceraldehyde 3-phosphate dehydrogenase [ec:1.2.1.12]	R52		'G3P[c] + NAD[c] + Pi[c] <--> BPG[c] + NADH[c]'	Glyceraldehyde 3-phosphate dehydrogenase [ec:1.2.1.12]	R52		'G3P[c] + NAD[c] + Pi[c] <--> BPG[c] + NADH[c]'	Glyceraldehyde 3-phosphate dehydrogenase [ec:1.2.1.12]
R53		'BPG[c] + ADP[c] <--> 3-PG[c] + ATP[c]'	Phosphoglycerate kinase [ec:2.7.2.3]	R53		'BPG[c] + ADP[c] <--> 3-PG[c] + ATP[c]'	Phosphoglycerate kinase [ec:2.7.2.3]	R53		'BPG[c] + ADP[c] <--> 3-PG[c] + ATP[c]'	Phosphoglycerate kinase [ec:2.7.2.3]	R53		'BPG[c] + ADP[c] <--> 3-PG[c] + ATP[c]'	Phosphoglycerate kinase [ec:2.7.2.3]	R53		'BPG[c] + ADP[c] <--> 3-PG[c] + ATP[c]'	Phosphoglycerate kinase [ec:2.7.2.3]
R54		'3-PG[c] <--> 2-PG[c]'	Phosphoglycerate mutase [ec:5.4.2.1]	R54		'3-PG[c] <--> 2-PG[c]'	Phosphoglycerate mutase [ec:5.4.2.1]	R54		'3-PG[c] <--> 2-PG[c]'	Phosphoglycerate mutase [ec:5.4.2.1]	R54		'3-PG[c] <--> 2-PG[c]'	Phosphoglycerate mutase [ec:5.4.2.1]	R54		'3-PG[c] <--> 2-PG[c]'	Phosphoglycerate mutase [ec:5.4.2.1]
R55		'2-PG[c] <--> PEP[c]'	Phosphopyruvate hydratase [ec:4.2.1.11]	R55		'2-PG[c] <--> PEP[c]'	Phosphopyruvate hydratase [ec:4.2.1.11]	R55		'2-PG[c] <--> PEP[c]'	Phosphopyruvate hydratase [ec:4.2.1.11]	R55		'2-PG[c] <--> PEP[c]'	Phosphopyruvate hydratase [ec:4.2.1.11]	R55		'2-PG[c] <--> PEP[c]'	Phosphopyruvate hydratase [ec:4.2.1.11]
R56		'PEP[c] + ADP[c] --> PYR[c] + ATP[c]'	Pyruvate kinase [ec:2.7.1.40]	R56		'PEP[c] + ADP[c] --> PYR[c] + ATP[c]'	Pyruvate kinase [ec:2.7.1.40]	R56		'PEP[c] + ADP[c] --> PYR[c] + ATP[c]'	Pyruvate kinase [ec:2.7.1.40]	R56		'PEP[c] + ADP[c] --> PYR[c] + ATP[c]'	Pyruvate kinase [ec:2.7.1.40]	R56		'PEP[c] + ADP[c] --> PYR[c] + ATP[c]'	Pyruvate kinase [ec:2.7.1.40]
R57		'PYR[c] + ATP[c] --> PEP[c] + AMP[c] + Pi[c]'	Phosphoenolpyruvate synthase [ec:2.7.9.2]	R57		'PYR[c] + ATP[c] --> PEP[c] + AMP[c] + Pi[c]'	Phosphoenolpyruvate synthase [ec:2.7.9.2]	R57		'PYR[c] + ATP[c] --> PEP[c] + AMP[c] + Pi[c]'	Phosphoenolpyruvate synthase [ec:2.7.9.2]	R57		'PYR[c] + ATP[c] --> PEP[c] + AMP[c] + Pi[c]'	Phosphoenolpyruvate synthase [ec:2.7.9.2]	R57		'PYR[c] + ATP[c] --> PEP[c] + AMP[c] + Pi[c]'	Phosphoenolpyruvate synthase [ec:2.7.9.2]
R58		'PYR[c] + NAD[c] + H-CoA[c] --> AC-CoA[c] + NADH[c] + CO2[c]'	Pyruvate dehydrogenase complex [ec:1.2.4.1&ec:2.3.1.12&ec:1.8.1.4]	R58		'PYR[c] + NAD[c] + H-CoA[c] --> AC-CoA[c] + NADH[c] + CO2[c]'	Pyruvate dehydrogenase complex [ec:1.2.4.1&ec:2.3.1.12&ec:1.8.1.4]	R58		'PYR[c] + NAD[c] + H-CoA[c] --> AC-CoA[c] + NADH[c] + CO2[c]'	Pyruvate dehydrogenase complex [ec:1.2.4.1&ec:2.3.1.12&ec:1.8.1.4]	R58		'PYR[c] + NAD[c] + H-CoA[c] --> AC-CoA[c] + NADH[c] + CO2[c]'	Pyruvate dehydrogenase complex [ec:1.2.4.1&ec:2.3.1.12&ec:1.8.1.4]	R58		'PYR[c] + NAD[c] + H-CoA[c] --> AC-CoA[c] + NADH[c] + CO2[c]'	Pyruvate dehydrogenase complex [ec:1.2.4.1&ec:2.3.1.12&ec:1.8.1.4]
R59		'PEP[c] + CO2[c] --> OXA[c] + Pi[c]'	Phosphoenolpyruvate carboxylase [ec:4.1.1.31]	R59		'PEP[c] + CO2[c] --> OXA[c] + Pi[c]'	Phosphoenolpyruvate carboxylase [ec:4.1.1.31]	R59		'PEP[c] + CO2[c] --> OXA[c] + Pi[c]'	Phosphoenolpyruvate carboxylase [ec:4.1.1.31]	R59		'PEP[c] + CO2[c] --> OXA[c] + Pi[c]'	Phosphoenolpyruvate carboxylase [ec:4.1.1.31]	R59		'PEP[c] + CO2[c] --> OXA[c] + Pi[c]'	Phosphoenolpyruvate carboxylase [ec:4.1.1.31]
R60		'PYR[c] + ATP[c] + CO2[c] <--> OXA[c] + ADP[c] + Pi[c]'	Pyruvate carboxylase [ec:6.4.1.1]	R60		'PYR[c] + ATP[c] + CO2[c] <--> OXA[c] + ADP[c] + Pi[c]'	Pyruvate carboxylase [ec:6.4.1.1]	R60		'PYR[c] + ATP[c] + CO2[c] <--> OXA[c] + ADP[c] + Pi[c]'	Pyruvate carboxylase [ec:6.4.1.1]	R60		'PYR[c] + ATP[c] + CO2[c] <--> OXA[c] + ADP[c] + Pi[c]'	Pyruvate carboxylase [ec:6.4.1.1]	R60		'PYR[c] + ATP[c] + CO2[c] <--> OXA[c] + ADP[c] + Pi[c]'	Pyruvate carboxylase [ec:6.4.1.1]
R61		'OXA[c] + ATP[c] --> PEP[c] + ADP[c] + CO2[c]'	Phosphoenolpyruvate carboxykinase [ec:4.1.1.49]	R61		'OXA[c] + ATP[c] --> PEP[c] + ADP[c] + CO2[c]'	Phosphoenolpyruvate carboxykinase [ec:4.1.1.49]	R61		'OXA[c] + ATP[c] --> PEP[c] + ADP[c] + CO2[c]'	Phosphoenolpyruvate carboxykinase [ec:4.1.1.49]	R61		'OXA[c] + ATP[c] --> PEP[c] + ADP[c] + CO2[c]'	Phosphoenolpyruvate carboxykinase [ec:4.1.1.49]	R61		'OXA[c] + ATP[c] --> PEP[c] + ADP[c] + CO2[c]'	Phosphoenolpyruvate carboxykinase [ec:4.1.1.49]
R62		'OXA[c] + AC-CoA[c] --> CIT[c] + H-CoA[c]'	Citrate synthase [ec:2.3.3.1]	R62		'OXA[c] + AC-CoA[c] --> CIT[c] + H-CoA[c]'	Citrate synthase [ec:2.3.3.1]	R62		'OXA[c] + AC-CoA[c] --> CIT[c] + H-CoA[c]'	Citrate synthase [ec:2.3.3.1]	R62		'OXA[c] + AC-CoA[c] --> CIT[c] + H-CoA[c]'	Citrate synthase [ec:2.3.3.1]	R62		'OXA[c] + AC-CoA[c] --> CIT[c] + H-CoA[c]'	Citrate synthase [ec:2.3.3.1]
R63		'CIT[c] <--> ISC[c]'	Aconitase [ec:4.2.1.3]	R63		'CIT[c] <--> ISC[c]'	Aconitase [ec:4.2.1.3]	R63		'CIT[c] <--> ISC[c]'	Aconitase [ec:4.2.1.3]	R63		'CIT[c] <--> ISC[c]'	Aconitase [ec:4.2.1.3]	R63		'CIT[c] <--> ISC[c]'	Aconitase [ec:4.2.1.3]
R64		'ISC[c] + NAD[c] --> aKG[c] + NADH[c] + CO2[c]'	Isocitrate dehydrogenase (NAD dependent) [ec:1.1.1.41]	R64		'ISC[c] + NAD[c] --> aKG[c] + NADH[c] + CO2[c]'	Isocitrate dehydrogenase (NAD dependent) [ec:1.1.1.41]	R64		'ISC[c] + NAD[c] --> aKG[c] + NADH[c] + CO2[c]'	Isocitrate dehydrogenase (NAD dependent) [ec:1.1.1.41]	R64		'ISC[c] + NAD[c] --> aKG[c] + NADH[c] + CO2[c]'	Isocitrate dehydrogenase (NAD dependent) [ec:1.1.1.41]	R64		'ISC[c] + NAD[c] --> aKG[c] + NADH[c] + CO2[c]'	Isocitrate dehydrogenase (NAD dependent) [ec:1.1.1.41]
R65		'aKG[c] + H-CoA[c] + NAD[c] --> SUC-CoA[c] + CO2[c] + NADH[c]'	α-ketoglutarate dehydrogenase [ec:1.2.4.2&2.3.1.61]	R65		'aKG[c] + H-CoA[c] + NAD[c] --> SUC-CoA[c] + CO2[c] + NADH[c]'	α-ketoglutarate dehydrogenase [ec:1.2.4.2&2.3.1.61]	R65		'aKG[c] + H-CoA[c] + NAD[c] --> SUC-CoA[c] + CO2[c] + NADH[c]'	α-ketoglutarate dehydrogenase [ec:1.2.4.2&2.3.1.61]	R65		'aKG[c] + H-CoA[c] + NAD[c] --> SUC-CoA[c] + CO2[c] + NADH[c]'	α-ketoglutarate dehydrogenase [ec:1.2.4.2&2.3.1.61]	R65		'aKG[c] + H-CoA[c] + NAD[c] --> SUC-CoA[c] + CO2[c] + NADH[c]'	α-ketoglutarate dehydrogenase [ec:1.2.4.2&2.3.1.61]
R66		'SUC-CoA[c] + ADP[c] + Pi[c] <--> SUC[c] + H-CoA[c] + ATP[c]'	Succinyl-CoA synthetase [ec:6.2.1.5]	R66		'SUC-CoA[c] + ADP[c] + Pi[c] <--> SUC[c] + H-CoA[c] + ATP[c]'	Succinyl-CoA synthetase [ec:6.2.1.5]	R66		'SUC-CoA[c] + ADP[c] + Pi[c] <--> SUC[c] + H-CoA[c] + ATP[c]'	Succinyl-CoA synthetase [ec:6.2.1.5]	R66		'SUC-CoA[c] + ADP[c] + Pi[c] <--> SUC[c] + H-CoA[c] + ATP[c]'	Succinyl-CoA synthetase [ec:6.2.1.5]	R66		'SUC-CoA[c] + ADP[c] + Pi[c] <--> SUC[c] + H-CoA[c] + ATP[c]'	Succinyl-CoA synthetase [ec:6.2.1.5]
R67		'SUC[c] + FAD[c] <--> FUM[c] + FADH2[c]'	Fumarate reductase [ec:1.3.5.4]	R67		'SUC[c] + FAD[c] <--> FUM[c] + FADH2[c]'	Fumarate reductase [ec:1.3.5.4]	R67		'SUC[c] + FAD[c] <--> FUM[c] + FADH2[c]'	Fumarate reductase [ec:1.3.5.4]	R67		'SUC[c] + FAD[c] <--> FUM[c] + FADH2[c]'	Fumarate reductase [ec:1.3.5.4]	R67		'SUC[c] + FAD[c] <--> FUM[c] + FADH2[c]'	Fumarate reductase [ec:1.3.5.4]
R68		'SUC[c] + UQ[c] --> FUM[c] + UQH2[c]'	Succinate dehydrogenase [ec:1.3.5.1]	R68		'SUC[c] + UQ[c] --> FUM[c] + UQH2[c]'	Succinate dehydrogenase [ec:1.3.5.1]	R68		'SUC[c] + UQ[c] --> FUM[c] + UQH2[c]'	Succinate dehydrogenase [ec:1.3.5.1]	R68		'SUC[c] + UQ[c] --> FUM[c] + UQH2[c]'	Succinate dehydrogenase [ec:1.3.5.1]	R68		'SUC[c] + UQ[c] --> FUM[c] + UQH2[c]'	Succinate dehydrogenase [ec:1.3.5.1]
R69		'FUM[c] <--> MAL[c]'	Fumarase [ec:4.2.1.2]	R69		'FUM[c] <--> MAL[c]'	Fumarase [ec:4.2.1.2]	R69		'FUM[c] <--> MAL[c]'	Fumarase [ec:4.2.1.2]	R69		'FUM[c] <--> MAL[c]'	Fumarase [ec:4.2.1.2]	R69		'FUM[c] <--> MAL[c]'	Fumarase [ec:4.2.1.2]
R70		'MAL[c] + NAD[c] <--> OXA[c] + NADH[c]'	Malate dehydrogenase [ec:1.1.1.37]	R70		'MAL[c] + NAD[c] <--> OXA[c] + NADH[c]'	Malate dehydrogenase [ec:1.1.1.37]	R70		'MAL[c] + NAD[c] <--> OXA[c] + NADH[c]'	Malate dehydrogenase [ec:1.1.1.37]	R70		'MAL[c] + NAD[c] <--> OXA[c] + NADH[c]'	Malate dehydrogenase [ec:1.1.1.37]	R70		'MAL[c] + NAD[c] <--> OXA[c] + NADH[c]'	Malate dehydrogenase [ec:1.1.1.37]
R71		'MAL[c] + NADP[c] --> PYR[c] + CO2[c] + NADPH[c]'	Malic enzyme (NADP dependent) [ec:1.1.1.40]	R71		'MAL[c] + NADP[c] --> PYR[c] + CO2[c] + NADPH[c]'	Malic enzyme (NADP dependent) [ec:1.1.1.40]	R71		'MAL[c] + NADP[c] --> PYR[c] + CO2[c] + NADPH[c]'	Malic enzyme (NADP dependent) [ec:1.1.1.40]	R71		'MAL[c] + NADP[c] --> PYR[c] + CO2[c] + NADPH[c]'	Malic enzyme (NADP dependent) [ec:1.1.1.40]	R71		'MAL[c] + NADP[c] --> PYR[c] + CO2[c] + NADPH[c]'	Malic enzyme (NADP dependent) [ec:1.1.1.40]
R72		'ISC[c] --> GLYOX[c] + SUC[c]'	Isocitrate lyase [ec:4.1.3.1]	R72		'ISC[c] --> GLYOX[c] + SUC[c]'	Isocitrate lyase [ec:4.1.3.1]	R72		'ISC[c] --> GLYOX[c] + SUC[c]'	Isocitrate lyase [ec:4.1.3.1]	R72		'ISC[c] --> GLYOX[c] + SUC[c]'	Isocitrate lyase [ec:4.1.3.1]	R72		'ISC[c] --> GLYOX[c] + SUC[c]'	Isocitrate lyase [ec:4.1.3.1]
R73		'GLYOX[c] + AC-CoA[c] --> MAL[c] + H-CoA[c]'	Malate synthase [ec:2.3.3.9]	R73		'GLYOX[c] + AC-CoA[c] --> MAL[c] + H-CoA[c]'	Malate synthase [ec:2.3.3.9]	R73		'GLYOX[c] + AC-CoA[c] --> MAL[c] + H-CoA[c]'	Malate synthase [ec:2.3.3.9]	R73		'GLYOX[c] + AC-CoA[c] --> MAL[c] + H-CoA[c]'	Malate synthase [ec:2.3.3.9]	R73		'GLYOX[c] + AC-CoA[c] --> MAL[c] + H-CoA[c]'	Malate synthase [ec:2.3.3.9]
R74		'AC[c] + H-CoA[c] + ATP[c] --> AC-CoA[c] + AMP[c] + 2 Pi[c]'	Acetyl-CoA synthetase [ec:6.2.1.1]	R74		'AC[c] + H-CoA[c] + ATP[c] --> AC-CoA[c] + AMP[c] + 2 Pi[c]'	Acetyl-CoA synthetase [ec:6.2.1.1]	R74		'AC[c] + H-CoA[c] + ATP[c] --> AC-CoA[c] + AMP[c] + 2 Pi[c]'	Acetyl-CoA synthetase [ec:6.2.1.1]	R74		'AC[c] + H-CoA[c] + ATP[c] --> AC-CoA[c] + AMP[c] + 2 Pi[c]'	Acetyl-CoA synthetase [ec:6.2.1.1]	R74		'AC[c] + H-CoA[c] + ATP[c] --> AC-CoA[c] + AMP[c] + 2 Pi[c]'	Acetyl-CoA synthetase [ec:6.2.1.1]
R75		'2 AC-CoA[c] <--> ACAC-CoA[c] + H-CoA[c]'	Acetoacetyl-CoA thiolase [ec:2.3.1.9]	R75		'2 AC-CoA[c] <--> ACAC-CoA[c] + H-CoA[c]'	Acetoacetyl-CoA thiolase [ec:2.3.1.9]	R75		'2 AC-CoA[c] <--> ACAC-CoA[c] + H-CoA[c]'	Acetoacetyl-CoA thiolase [ec:2.3.1.9]	R75		'2 AC-CoA[c] <--> ACAC-CoA[c] + H-CoA[c]'	Acetoacetyl-CoA thiolase [ec:2.3.1.9]	R75		'2 AC-CoA[c] <--> ACAC-CoA[c] + H-CoA[c]'	Acetoacetyl-CoA thiolase [ec:2.3.1.9]
R76		'AC-CoA[c] + SUC[c] --> AC[c] + SUC-CoA[c]'	Succinyl-CoA:acetate CoA-transferase [ec:2.8.3.18]	R76		'AC-CoA[c] + SUC[c] --> AC[c] + SUC-CoA[c]'	Succinyl-CoA:acetate CoA-transferase [ec:2.8.3.18]	R76		'AC-CoA[c] + SUC[c] --> AC[c] + SUC-CoA[c]'	Succinyl-CoA:acetate CoA-transferase [ec:2.8.3.18]	R76		'AC-CoA[c] + SUC[c] --> AC[c] + SUC-CoA[c]'	Succinyl-CoA:acetate CoA-transferase [ec:2.8.3.18]	R76		'AC-CoA[c] + SUC[c] --> AC[c] + SUC-CoA[c]'	Succinyl-CoA:acetate CoA-transferase [ec:2.8.3.18]
R77		'ACAC[c] + SUC-CoA[c] <--> ACAC-CoA[c] + SUC[c]'	3-Oxoacid CoA-transferase [ec:2.8.3.5]	R77		'ACAC[c] + SUC-CoA[c] <--> ACAC-CoA[c] + SUC[c]'	3-Oxoacid CoA-transferase [ec:2.8.3.5]	R77		'ACAC[c] + SUC-CoA[c] <--> ACAC-CoA[c] + SUC[c]'	3-Oxoacid CoA-transferase [ec:2.8.3.5]	R77		'ACAC[c] + SUC-CoA[c] <--> ACAC-CoA[c] + SUC[c]'	3-Oxoacid CoA-transferase [ec:2.8.3.5]	R77		'ACAC[c] + SUC-CoA[c] <--> ACAC-CoA[c] + SUC[c]'	3-Oxoacid CoA-transferase [ec:2.8.3.5]
R78		'PYR[c] + H-CoA[c] --> AC-CoA[c] + FOR[c]'	Pyruvate formate lyase [ec:2.3.1.54]	R78		'PYR[c] + H-CoA[c] --> AC-CoA[c] + FOR[c]'	Pyruvate formate lyase [ec:2.3.1.54]	R78		'PYR[c] + H-CoA[c] --> AC-CoA[c] + FOR[c]'	Pyruvate formate lyase [ec:2.3.1.54]	R78		'PYR[c] + H-CoA[c] --> AC-CoA[c] + FOR[c]'	Pyruvate formate lyase [ec:2.3.1.54]	R78		'PYR[c] + H-CoA[c] --> AC-CoA[c] + FOR[c]'	Pyruvate formate lyase [ec:2.3.1.54]
R79		'FOR[c] + NAD[c] --> CO2[c] + NADH[c]'	Formate dehydrogenase [ec:1.17.1.9]	R79		'FOR[c] + NAD[c] --> CO2[c] + NADH[c]'	Formate dehydrogenase [ec:1.17.1.9]	R79		'FOR[c] + NAD[c] --> CO2[c] + NADH[c]'	Formate dehydrogenase [ec:1.17.1.9]	R79		'FOR[c] + NAD[c] --> CO2[c] + NADH[c]'	Formate dehydrogenase [ec:1.17.1.9]	R79		'FOR[c] + NAD[c] --> CO2[c] + NADH[c]'	Formate dehydrogenase [ec:1.17.1.9]
R80		'H-CoA[c] + ACP[c] --> AC-CoA[c] + Pi[c]'	Phosphate acetyltransferase [ec:2.3.1.8]	R80		'H-CoA[c] + ACP[c] --> AC-CoA[c] + Pi[c]'	Phosphate acetyltransferase [ec:2.3.1.8]	R80		'H-CoA[c] + ACP[c] --> AC-CoA[c] + Pi[c]'	Phosphate acetyltransferase [ec:2.3.1.8]	R80		'H-CoA[c] + ACP[c] --> AC-CoA[c] + Pi[c]'	Phosphate acetyltransferase [ec:2.3.1.8]	R80		'H-CoA[c] + ACP[c] --> AC-CoA[c] + Pi[c]'	Phosphate acetyltransferase [ec:2.3.1.8]
R81		'ACP[c] + ADP[c] --> AC[c] + ATP[c]'	Acetate kinase [ec:2.7.2.1]	R81		'ACP[c] + ADP[c] --> AC[c] + ATP[c]'	Acetate kinase [ec:2.7.2.1]	R81		'ACP[c] + ADP[c] --> AC[c] + ATP[c]'	Acetate kinase [ec:2.7.2.1]	R81		'ACP[c] + ADP[c] --> AC[c] + ATP[c]'	Acetate kinase [ec:2.7.2.1]	R81		'ACP[c] + ADP[c] --> AC[c] + ATP[c]'	Acetate kinase [ec:2.7.2.1]
R82		'AC-CoA[c] + NADH[c] <--> ACA[c] + NAD[c] + H-CoA[c]'	Acetaldehyde dehydrogenase [ec:1.2.1.10]	R82		'AC-CoA[c] + NADH[c] <--> ACA[c] + NAD[c] + H-CoA[c]'	Acetaldehyde dehydrogenase [ec:1.2.1.10]	R82		'AC-CoA[c] + NADH[c] <--> ACA[c] + NAD[c] + H-CoA[c]'	Acetaldehyde dehydrogenase [ec:1.2.1.10]	R82		'AC-CoA[c] + NADH[c] <--> ACA[c] + NAD[c] + H-CoA[c]'	Acetaldehyde dehydrogenase [ec:1.2.1.10]	R82		'AC-CoA[c] + NADH[c] <--> ACA[c] + NAD[c] + H-CoA[c]'	Acetaldehyde dehydrogenase [ec:1.2.1.10]
R83		'ACA[c] + NAD[c] --> AC[c] + NADH[c]'	Aldehyde dehydrogenase (NAD dependent) [ec:1.2.1.3]	R83		'ACA[c] + NAD[c] --> AC[c] + NADH[c]'	Aldehyde dehydrogenase (NAD dependent) [ec:1.2.1.3]	R83		'ACA[c] + NAD[c] --> AC[c] + NADH[c]'	Aldehyde dehydrogenase (NAD dependent) [ec:1.2.1.3]	R83		'ACA[c] + NAD[c] --> AC[c] + NADH[c]'	Aldehyde dehydrogenase (NAD dependent) [ec:1.2.1.3]	R83		'ACA[c] + NAD[c] --> AC[c] + NADH[c]'	Aldehyde dehydrogenase (NAD dependent) [ec:1.2.1.3]
R84		'ACA[c] + NADH[c] --> ETOH[c] + NAD[c]'	Alcohol dehydrogenase [ec:1.1.1.1]	R84		'ACA[c] + NADH[c] --> ETOH[c] + NAD[c]'	Alcohol dehydrogenase [ec:1.1.1.1]	R84		'ACA[c] + NADH[c] --> ETOH[c] + NAD[c]'	Alcohol dehydrogenase [ec:1.1.1.1]	R84		'ACA[c] + NADH[c] --> ETOH[c] + NAD[c]'	Alcohol dehydrogenase [ec:1.1.1.1]	R84		'ACA[c] + NADH[c] --> ETOH[c] + NAD[c]'	Alcohol dehydrogenase [ec:1.1.1.1]
R85		'PYR[c] + NADH[c] --> LAC[c] + NAD[c]'	Lactate dehydrogenase [ec:1.1.1.27]	R85		'PYR[c] + NADH[c] --> LAC[c] + NAD[c]'	Lactate dehydrogenase [ec:1.1.1.27]	R85		'PYR[c] + NADH[c] --> LAC[c] + NAD[c]'	Lactate dehydrogenase [ec:1.1.1.27]	R85		'PYR[c] + NADH[c] --> LAC[c] + NAD[c]'	Lactate dehydrogenase [ec:1.1.1.27]	R85		'PYR[c] + NADH[c] --> LAC[c] + NAD[c]'	Lactate dehydrogenase [ec:1.1.1.27]
R86		'ACAC[c] --> ACETONE[c] + CO2[c]'	Acetoacetate decarboxylase [ec:4.1.1.4]	R86		'ACAC[c] --> ACETONE[c] + CO2[c]'	Acetoacetate decarboxylase [ec:4.1.1.4]	R86		'ACAC[c] --> ACETONE[c] + CO2[c]'	Acetoacetate decarboxylase [ec:4.1.1.4]	R86		'ACAC[c] --> ACETONE[c] + CO2[c]'	Acetoacetate decarboxylase [ec:4.1.1.4]	R86		'ACAC[c] --> ACETONE[c] + CO2[c]'	Acetoacetate decarboxylase [ec:4.1.1.4]
R87		'ACAC-CoA[c] + NADPH[c] <--> 3-HBut-CoA[c] + NADP[c]'	3-Hydroxyacyl-CoA dehydrogenase [ec:1.1.1.35]	R87		'ACAC-CoA[c] + NADPH[c] <--> 3-HBut-CoA[c] + NADP[c]'	3-Hydroxyacyl-CoA dehydrogenase [ec:1.1.1.35]	R87		'ACAC-CoA[c] + NADPH[c] <--> 3-HBut-CoA[c] + NADP[c]'	3-Hydroxyacyl-CoA dehydrogenase [ec:1.1.1.35]	R87		'ACAC-CoA[c] + NADPH[c] <--> 3-HBut-CoA[c] + NADP[c]'	3-Hydroxyacyl-CoA dehydrogenase [ec:1.1.1.35]	R87		'ACAC-CoA[c] + NADPH[c] <--> 3-HBut-CoA[c] + NADP[c]'	3-Hydroxyacyl-CoA dehydrogenase [ec:1.1.1.35]
R88		'3-HBut-CoA[c] --> PHB[c] + H-CoA[c]'	Poly(3-hydroxybutyrate) synthase [ec:2.3.1.-]	R88		'3-HBut-CoA[c] --> PHB[c] + H-CoA[c]'	Poly(3-hydroxybutyrate) synthase [ec:2.3.1.-]	R88		'3-HBut-CoA[c] --> PHB[c] + H-CoA[c]'	Poly(3-hydroxybutyrate) synthase [ec:2.3.1.-]	R88		'3-HBut-CoA[c] --> PHB[c] + H-CoA[c]'	Poly(3-hydroxybutyrate) synthase [ec:2.3.1.-]	R88		'3-HBut-CoA[c] --> PHB[c] + H-CoA[c]'	Poly(3-hydroxybutyrate) synthase [ec:2.3.1.-]
R89		'PHB[c] + NAD[c] --> ACAC[c] + NADH[c]'	PHA depolymerase [ec:3.1.1.75]	R89		'PHB[c] + NAD[c] --> ACAC[c] + NADH[c]'	PHA depolymerase [ec:3.1.1.75]	R89		'PHB[c] + NAD[c] --> ACAC[c] + NADH[c]'	PHA depolymerase [ec:3.1.1.75]	R89		'PHB[c] + NAD[c] --> ACAC[c] + NADH[c]'	PHA depolymerase [ec:3.1.1.75]	R89		'PHB[c] + NAD[c] --> ACAC[c] + NADH[c]'	PHA depolymerase [ec:3.1.1.75]
R90		'aKG[c] + NADPH[c] + NH3[c] <--> GLU[c] + NADP[c]'	Glutamate dehydrogenase [ec:1.4.1.2]	R90		'aKG[c] + NADPH[c] + NH3[c] <--> GLU[c] + NADP[c]'	Glutamate dehydrogenase [ec:1.4.1.2]	R90		'aKG[c] + NADPH[c] + NH3[c] <--> GLU[c] + NADP[c]'	Glutamate dehydrogenase [ec:1.4.1.2]	R90		'aKG[c] + NADPH[c] + NH3[c] <--> GLU[c] + NADP[c]'	Glutamate dehydrogenase [ec:1.4.1.2]	R90		'aKG[c] + NADPH[c] + NH3[c] <--> GLU[c] + NADP[c]'	Glutamate dehydrogenase [ec:1.4.1.2]
R91		'GLU[c] + NH3[c] + ATP[c] <--> GLN[c] + ADP[c] + Pi[c]'	Glutamine synthase [ec:6.3.1.2]	R91		'GLU[c] + NH3[c] + ATP[c] <--> GLN[c] + ADP[c] + Pi[c]'	Glutamine synthase [ec:6.3.1.2]	R91		'GLU[c] + NH3[c] + ATP[c] <--> GLN[c] + ADP[c] + Pi[c]'	Glutamine synthase [ec:6.3.1.2]	R91		'GLU[c] + NH3[c] + ATP[c] <--> GLN[c] + ADP[c] + Pi[c]'	Glutamine synthase [ec:6.3.1.2]	R91		'GLU[c] + NH3[c] + ATP[c] <--> GLN[c] + ADP[c] + Pi[c]'	Glutamine synthase [ec:6.3.1.2]
R92		'0.021 G6P[c] + 0.007 F6P[c] + 0.09 R5P[c] + 0.036 E4P[c] + 0.013 G3P[c] + 0.15 3-PG[c] + 0.052 PEP[c] + 0.283 PYR[c] + 0.374 AC-CoA[c] + 0.179 OXA[c] + 0.832 GLU[c] + 0.025 GLN[c] + 4.11 ATP[c] + 0.826 NADPH[c] + 0.312 NAD[c] --> BIOMASS[c] + 0.751 aKG[c] + 0.261 CO2[c] + 0.374 H-CoA[c] + 4.11 ADP[c] + 4.479 Pi[c] + 0.826 NADP[c] + 0.312 NADH[c]'	Biomass formation	R92		'0.021 G6P[c] + 0.007 F6P[c] + 0.09 R5P[c] + 0.036 E4P[c] + 0.013 G3P[c] + 0.15 3-PG[c] + 0.052 PEP[c] + 0.283 PYR[c] + 0.374 AC-CoA[c] + 0.179 OXA[c] + 0.832 GLU[c] + 0.025 GLN[c] + 4.11 ATP[c] + 0.826 NADPH[c] + 0.312 NAD[c] --> BIOMASS[c] + 0.751 aKG[c] + 0.261 CO2[c] + 0.374 H-CoA[c] + 4.11 ADP[c] + 4.479 Pi[c] + 0.826 NADP[c] + 0.312 NADH[c]'	Biomass formation	R92		'0.021 G6P[c] + 0.007 F6P[c] + 0.09 R5P[c] + 0.036 E4P[c] + 0.013 G3P[c] + 0.15 3-PG[c] + 0.052 PEP[c] + 0.283 PYR[c] + 0.374 AC-CoA[c] + 0.179 OXA[c] + 0.832 GLU[c] + 0.025 GLN[c] + 4.11 ATP[c] + 0.826 NADPH[c] + 0.312 NAD[c] --> BIOMASS[c] + 0.751 aKG[c] + 0.261 CO2[c] + 0.374 H-CoA[c] + 4.11 ADP[c] + 4.479 Pi[c] + 0.826 NADP[c] + 0.312 NADH[c]'	Biomass formation	R92		'0.021 G6P[c] + 0.007 F6P[c] + 0.09 R5P[c] + 0.036 E4P[c] + 0.013 G3P[c] + 0.15 3-PG[c] + 0.052 PEP[c] + 0.283 PYR[c] + 0.374 AC-CoA[c] + 0.179 OXA[c] + 0.832 GLU[c] + 0.025 GLN[c] + 4.11 ATP[c] + 0.826 NADPH[c] + 0.312 NAD[c] --> BIOMASS[c] + 0.751 aKG[c] + 0.261 CO2[c] + 0.374 H-CoA[c] + 4.11 ADP[c] + 4.479 Pi[c] + 0.826 NADP[c] + 0.312 NADH[c]'	Biomass formation	R92		'0.021 G6P[c] + 0.007 F6P[c] + 0.09 R5P[c] + 0.036 E4P[c] + 0.013 G3P[c] + 0.15 3-PG[c] + 0.052 PEP[c] + 0.283 PYR[c] + 0.374 AC-CoA[c] + 0.179 OXA[c] + 0.832 GLU[c] + 0.025 GLN[c] + 4.11 ATP[c] + 0.826 NADPH[c] + 0.312 NAD[c] --> BIOMASS[c] + 0.751 aKG[c] + 0.261 CO2[c] + 0.374 H-CoA[c] + 4.11 ADP[c] + 4.479 Pi[c] + 0.826 NADP[c] + 0.312 NADH[c]'	Biomass formation
R93		'NADH[c] + FAD[c] --> NAD[c] + FADH2[c]'	Flavin reductase (NAD dependent) [ec:1.5.1.36]	R93		'NADH[c] + FAD[c] --> NAD[c] + FADH2[c]'	Flavin reductase (NAD dependent) [ec:1.5.1.36]	R93		'NADH[c] + FAD[c] --> NAD[c] + FADH2[c]'	Flavin reductase (NAD dependent) [ec:1.5.1.36]	R93		'NADH[c] + FAD[c] --> NAD[c] + FADH2[c]'	Flavin reductase (NAD dependent) [ec:1.5.1.36]	R93		'NADH[c] + FAD[c] --> NAD[c] + FADH2[c]'	Flavin reductase (NAD dependent) [ec:1.5.1.36]
R94		'NADPH[c] + NAD[c] --> NADP[c] + NADH[c]'	NAD(P) transhydrogenase [ec:1.6.1.3]	R94		'NADPH[c] + NAD[c] --> NADP[c] + NADH[c]'	NAD(P) transhydrogenase [ec:1.6.1.3]	R94		'NADPH[c] + NAD[c] --> NADP[c] + NADH[c]'	NAD(P) transhydrogenase [ec:1.6.1.3]	R94		'NADPH[c] + NAD[c] --> NADP[c] + NADH[c]'	NAD(P) transhydrogenase [ec:1.6.1.3]	R94		'NADPH[c] + NAD[c] --> NADP[c] + NADH[c]'	NAD(P) transhydrogenase [ec:1.6.1.3]
R95		'NADH[c] + NADP[c] + H[e] --> NAD[c] + NADPH[c] + H[c]'	NAD(P) transhydrogenase (Re/Si-specific) [ec:1.6.1.2]	R95		'NADH[c] + NADP[c] + H[e] --> NAD[c] + NADPH[c] + H[c]'	NAD(P) transhydrogenase (Re/Si-specific) [ec:1.6.1.2]	R95		'NADH[c] + NADP[c] + H[e] --> NAD[c] + NADPH[c] + H[c]'	NAD(P) transhydrogenase (Re/Si-specific) [ec:1.6.1.2]	R95		'NADH[c] + NADP[c] + H[e] --> NAD[c] + NADPH[c] + H[c]'	NAD(P) transhydrogenase (Re/Si-specific) [ec:1.6.1.2]	R95		'NADH[c] + NADP[c] + H[e] --> NAD[c] + NADPH[c] + H[c]'	NAD(P) transhydrogenase (Re/Si-specific) [ec:1.6.1.2]
R96		'H2[c] + NAD[c] --> NADH[c]'	Hydrogen dehydrogenase [ec:1.12.1.2]	R96		'H2[c] + NAD[c] --> NADH[c]'	Hydrogen dehydrogenase [ec:1.12.1.2]	R96		'H2[c] + NAD[c] --> NADH[c]'	Hydrogen dehydrogenase [ec:1.12.1.2]	R96		'H2[c] + NAD[c] --> NADH[c]'	Hydrogen dehydrogenase [ec:1.12.1.2]	R96		'H2[c] + NAD[c] --> NADH[c]'	Hydrogen dehydrogenase [ec:1.12.1.2]
R97		'UQ[c] + H2[c] --> UQH2[c]'	Hydrogen dehydrogenase [ec:1.12.99.6]	R97		'UQ[c] + H2[c] --> UQH2[c]'	Hydrogen dehydrogenase [ec:1.12.99.6]	R97		'UQ[c] + H2[c] --> UQH2[c]'	Hydrogen dehydrogenase [ec:1.12.99.6]	R97		'UQ[c] + H2[c] --> UQH2[c]'	Hydrogen dehydrogenase [ec:1.12.99.6]	R97		'UQ[c] + H2[c] --> UQH2[c]'	Hydrogen dehydrogenase [ec:1.12.99.6]
R98		'NADH[c] + UQ[c] --> NAD[c] + UQH2[c]'	NADH-quinone oxidoreductase [ec:1.6.5.9]	R98		'NADH[c] + UQ[c] --> NAD[c] + UQH2[c]'	NADH-quinone oxidoreductase [ec:1.6.5.9]	R98		'NADH[c] + UQ[c] --> NAD[c] + UQH2[c]'	NADH-quinone oxidoreductase [ec:1.6.5.9]	R98		'NADH[c] + UQ[c] --> NAD[c] + UQH2[c]'	NADH-quinone oxidoreductase [ec:1.6.5.9]	R98		'NADH[c] + UQ[c] --> NAD[c] + UQH2[c]'	NADH-quinone oxidoreductase [ec:1.6.5.9]
R99		'NADH[c] + UQ[c] + 4 H[c] --> NAD[c] + UQH2[c] + 4 H[e]'	NADH-quinone oxidoreductase [ec:7.1.1.2]	R99		'NADH[c] + UQ[c] + 4 H[c] --> NAD[c] + UQH2[c] + 4 H[e]'	NADH-quinone oxidoreductase [ec:7.1.1.2]	R99		'NADH[c] + UQ[c] + 4 H[c] --> NAD[c] + UQH2[c] + 4 H[e]'	NADH-quinone oxidoreductase [ec:7.1.1.2]	R99		'NADH[c] + UQ[c] + 4 H[c] --> NAD[c] + UQH2[c] + 4 H[e]'	NADH-quinone oxidoreductase [ec:7.1.1.2]	R99		'NADH[c] + UQ[c] + 4 H[c] --> NAD[c] + UQH2[c] + 4 H[e]'	NADH-quinone oxidoreductase [ec:7.1.1.2]
R100		'UQH2[c] + 4 H[c] + 0.5 O2[c] --> UQ[c] + 4 H[e]'	Cytochrome bd oxidase [ec:7.1.1.7]	R100		'UQH2[c] + 4 H[c] + 0.5 O2[c] --> UQ[c] + 4 H[e]'	Cytochrome bd oxidase [ec:7.1.1.7]	R100		'UQH2[c] + 4 H[c] + 0.5 O2[c] --> UQ[c] + 4 H[e]'	Cytochrome bd oxidase [ec:7.1.1.7]	R100		'UQH2[c] + 4 H[c] + 0.5 O2[c] --> UQ[c] + 4 H[e]'	Cytochrome bd oxidase [ec:7.1.1.7]	R100		'UQH2[c] + 4 H[c] + 0.5 O2[c] --> UQ[c] + 4 H[e]'	Cytochrome bd oxidase [ec:7.1.1.7]
R101		'UQH2[c] + 2 H[c] + 0.5 O2[c] --> UQ[c] + 2 H[e]'	Cytochrome bo oxidase [ec:7.1.1.3]	R101		'UQH2[c] + 2 H[c] + 0.5 O2[c] --> UQ[c] + 2 H[e]'	Cytochrome bo oxidase [ec:7.1.1.3]	R101		'UQH2[c] + 2 H[c] + 0.5 O2[c] --> UQ[c] + 2 H[e]'	Cytochrome bo oxidase [ec:7.1.1.3]	R101		'UQH2[c] + 2 H[c] + 0.5 O2[c] --> UQ[c] + 2 H[e]'	Cytochrome bo oxidase [ec:7.1.1.3]	R101		'UQH2[c] + 2 H[c] + 0.5 O2[c] --> UQ[c] + 2 H[e]'	Cytochrome bo oxidase [ec:7.1.1.3]
R102		'ADP[c] + 4 H[e] + Pi[c] --> ATP[c] + 4 H[c]'	ATP synthase [ec:3.6.3.14]	R102		'ADP[c] + 4 H[e] + Pi[c] --> ATP[c] + 4 H[c]'	ATP synthase [ec:3.6.3.14]	R102		'ADP[c] + 4 H[e] + Pi[c] --> ATP[c] + 4 H[c]'	ATP synthase [ec:3.6.3.14]	R102		'ADP[c] + 4 H[e] + Pi[c] --> ATP[c] + 4 H[c]'	ATP synthase [ec:3.6.3.14]	R102		'ADP[c] + 4 H[e] + Pi[c] --> ATP[c] + 4 H[c]'	ATP synthase [ec:3.6.3.14]
R103		'ADP[c] + 3 H[e] + Pi[c] <-- ATP[c] + 3 H[c]'	reverse ATP synthase (proton pump) [ec:3.6.3.14]	R103		'ADP[c] + 3 H[e] + Pi[c] <-- ATP[c] + 3 H[c]'	reverse ATP synthase (proton pump) [ec:3.6.3.14]	R103		'ADP[c] + 3 H[e] + Pi[c] <-- ATP[c] + 3 H[c]'	reverse ATP synthase (proton pump) [ec:3.6.3.14]	R103		'ADP[c] + 3 H[e] + Pi[c] <-- ATP[c] + 3 H[c]'	reverse ATP synthase (proton pump) [ec:3.6.3.14]	R103		'ADP[c] + 3 H[e] + Pi[c] <-- ATP[c] + 3 H[c]'	reverse ATP synthase (proton pump) [ec:3.6.3.14]
R104		'AMP[c] + ATP[c] --> 2 ADP[c]'	Adenylate kinase [ec:2.7.4.3]	R104		'AMP[c] + ATP[c] --> 2 ADP[c]'	Adenylate kinase [ec:2.7.4.3]	R104		'AMP[c] + ATP[c] --> 2 ADP[c]'	Adenylate kinase [ec:2.7.4.3]	R104		'AMP[c] + ATP[c] --> 2 ADP[c]'	Adenylate kinase [ec:2.7.4.3]	R104		'AMP[c] + ATP[c] --> 2 ADP[c]'	Adenylate kinase [ec:2.7.4.3]
R105		'aKG[c] --> Succinate-semialdehyde[c] + CO2[c]'	2-oxoglutarate decarboxylase [ec:4.1.1.71]	R105		'aKG[c] --> Succinate-semialdehyde[c] + CO2[c]'	2-oxoglutarate decarboxylase [ec:4.1.1.71]	R105		'aKG[c] --> Succinate-semialdehyde[c] + CO2[c]'	2-oxoglutarate decarboxylase [ec:4.1.1.71]	R105		'aKG[c] --> Succinate-semialdehyde[c] + CO2[c]'	2-oxoglutarate decarboxylase [ec:4.1.1.71]	R105		'aKG[c] --> Succinate-semialdehyde[c] + CO2[c]'	2-oxoglutarate decarboxylase [ec:4.1.1.71]
R106		'SUC-CoA[c] + NADPH[c] --> Succinate-semialdehyde[c] + H-CoA[c] + NADP[c]'	Succinate-semialdehyde dehydrogenase [ec:1.2.1.76]	R106		'SUC-CoA[c] + NADPH[c] --> Succinate-semialdehyde[c] + H-CoA[c] + NADP[c]'	Succinate-semialdehyde dehydrogenase [ec:1.2.1.76]	R106		'SUC-CoA[c] + NADPH[c] --> Succinate-semialdehyde[c] + H-CoA[c] + NADP[c]'	Succinate-semialdehyde dehydrogenase [ec:1.2.1.76]	R106		'SUC-CoA[c] + NADPH[c] --> Succinate-semialdehyde[c] + H-CoA[c] + NADP[c]'	Succinate-semialdehyde dehydrogenase [ec:1.2.1.76]	R106		'SUC-CoA[c] + NADPH[c] --> Succinate-semialdehyde[c] + H-CoA[c] + NADP[c]'	Succinate-semialdehyde dehydrogenase [ec:1.2.1.76]
R107		'Succinate-semialdehyde[c] + NADH[c] --> 4-Hydroxybutanoate[c] + NAD[c]'	4-Hydroxybutyrate dehydrogenase [ec:1.1.1.61]	R107		'Succinate-semialdehyde[c] + NADH[c] --> 4-Hydroxybutanoate[c] + NAD[c]'	4-Hydroxybutyrate dehydrogenase [ec:1.1.1.61]	R107		'Succinate-semialdehyde[c] + NADH[c] --> 4-Hydroxybutanoate[c] + NAD[c]'	4-Hydroxybutyrate dehydrogenase [ec:1.1.1.61]	R107		'Succinate-semialdehyde[c] + NADH[c] --> 4-Hydroxybutanoate[c] + NAD[c]'	4-Hydroxybutyrate dehydrogenase [ec:1.1.1.61]	R107		'Succinate-semialdehyde[c] + NADH[c] --> 4-Hydroxybutanoate[c] + NAD[c]'	4-Hydroxybutyrate dehydrogenase [ec:1.1.1.61]
R108		'4-Hydroxybutanoate[c] + AC-CoA[c] <--> 4-Hydroxybutyryl-CoA[c] + AC[c]'	4-Hydroxybutyrate CoA-transferase [ec:2.8.3.-]	R108		'4-Hydroxybutanoate[c] + AC-CoA[c] <--> 4-Hydroxybutyryl-CoA[c] + AC[c]'	4-Hydroxybutyrate CoA-transferase [ec:2.8.3.-]	R108		'4-Hydroxybutanoate[c] + AC-CoA[c] <--> 4-Hydroxybutyryl-CoA[c] + AC[c]'	4-Hydroxybutyrate CoA-transferase [ec:2.8.3.-]	R108		'4-Hydroxybutanoate[c] + AC-CoA[c] <--> 4-Hydroxybutyryl-CoA[c] + AC[c]'	4-Hydroxybutyrate CoA-transferase [ec:2.8.3.-]	R108		'4-Hydroxybutanoate[c] + AC-CoA[c] <--> 4-Hydroxybutyryl-CoA[c] + AC[c]'	4-Hydroxybutyrate CoA-transferase [ec:2.8.3.-]
R109		'4-Hydroxybutyryl-CoA[c] --> P-4HB[c] + H-CoA[c]'	Poly(hydroxyalkanoate) synthase [ec:2.3.1.-]	R109		'4-Hydroxybutyryl-CoA[c] --> P-4HB[c] + H-CoA[c]'	Poly(hydroxyalkanoate) synthase [ec:2.3.1.-]	R109		'4-Hydroxybutyryl-CoA[c] --> P-4HB[c] + H-CoA[c]'	Poly(hydroxyalkanoate) synthase [ec:2.3.1.-]	R109		'4-Hydroxybutyryl-CoA[c] --> P-4HB[c] + H-CoA[c]'	Poly(hydroxyalkanoate) synthase [ec:2.3.1.-]	R109		'4-Hydroxybutyryl-CoA[c] --> P-4HB[c] + H-CoA[c]'	Poly(hydroxyalkanoate) synthase [ec:2.3.1.-]
	};				};				};				};				};
	mnet = CalculateFluxModes(ReactionFormulas,CreateFluxModeOpts('parse-only',true));				mnet = CalculateFluxModes(ReactionFormulas,CreateFluxModeOpts('parse-only',true));				mnet = CalculateFluxModes(ReactionFormulas,CreateFluxModeOpts('parse-only',true));				mnet = CalculateFluxModes(ReactionFormulas,CreateFluxModeOpts('parse-only',true));				mnet = CalculateFluxModes(ReactionFormulas,CreateFluxModeOpts('parse-only',true));

## Sheet: P3HV
	C. necator on Fructose + CO2				C. necator on Glycerol + CO2				C. necator on Acetate + CO2				C. necator on Formate + CO2				C. necator on CO2 + H2
RxN		Equation	Function / Enzyme	RxN		Equation	Function / Enzyme	RxN		Equation	Function / Enzyme	RxN		Equation	Function / Enzyme	RxN		Equation	Function / Enzyme
R1	ReactionFormulas = {	'--> CO2[e]'	Carbondioxide in	R1	ReactionFormulas = {	'--> CO2[e]'	Carbondioxide in	R1	ReactionFormulas = {	'--> CO2[e]'	Carbondioxide in	R1	ReactionFormulas = {	'--> CO2[e]'	Carbondioxide in	R1	ReactionFormulas = {	'--> CO2[e]'	Carbondioxide in
R2		'--> FRC[e]'	Fructose in	R2		'--> GLY[e]'	Fructose in	R2		'--> AC[e]'	Fructose in	R2		'--> FOR[e]'	Fructose in	R2		'--> H2[e]'	Hydrogen in
R3		'--> NH3[e]'	Ammonia in	R3		'--> NH3[e]'	Ammonia in	R3		'--> NH3[e]'	Ammonia in	R3		'--> NH3[e]'	Ammonia in	R3		'--> NH3[e]'	Ammonia in
R4		'--> O2[e]'	Oxygen in	R4		'--> O2[e]'	Oxygen in	R4		'--> O2[e]'	Oxygen in	R4		'--> O2[e]'	Oxygen in	R4		'--> O2[e]'	Oxygen in
R5		'CO2[e] -->'	Carbondioxide out	R5		'CO2[e] -->'	Carbondioxide out	R5		'CO2[e] -->'	Carbondioxide out	R5		'CO2[e] -->'	Carbondioxide out	R5		'CO2[e] -->'	Carbondioxide out
R6		'FOR[e] -->'	Formate out	R6		'FOR[e] -->'	Formate out	R6		'FOR[e] -->'	Formate out	R6		'FOR[e] -->'	Formate out	R6		'FOR[e] -->'	Formate out
R7		'AC[e] -->'	Acetate out	R7		'AC[e] -->'	Acetate out	R7		'AC[e] -->'	Acetate out	R7		'AC[e] -->'	Acetate out	R7		'AC[e] -->'	Acetate out
R8		'ETOH[e] -->'	Ethanol out	R8		'ETOH[e] -->'	Ethanol out	R8		'ETOH[e] -->'	Ethanol out	R8		'ETOH[e] -->'	Ethanol out	R8		'ETOH[e] -->'	Ethanol out
R9		'LAC[e] -->'	Lactate out	R9		'LAC[e] -->'	Lactate out	R9		'LAC[e] -->'	Lactate out	R9		'LAC[e] -->'	Lactate out	R9		'LAC[e] -->'	Lactate out
R10		'ACETONE[e] -->'	Acetone out	R10		'ACETONE[e] -->'	Acetone out	R10		'ACETONE[e] -->'	Acetone out	R10		'ACETONE[e] -->'	Acetone out	R10		'ACETONE[e] -->'	Acetone out
R11		'SUC[e] -->'	Succinate out	R11		'SUC[e] -->'	Succinate out	R11		'SUC[e] -->'	Succinate out	R11		'SUC[e] -->'	Succinate out	R11		'SUC[e] -->'	Succinate out
R12		'PHB[e] -->'	Polyhydroxybutyrate out	R12		'PHB[e] -->'	Polyhydroxybutyrate out	R12		'PHB[e] -->'	Polyhydroxybutyrate out	R12		'PHB[e] -->'	Polyhydroxybutyrate out	R12		'PHB[e] -->'	Polyhydroxybutyrate out
R13		'BIOMASS[e] -->'	Biomass out	R13		'BIOMASS[e] -->'	Biomass out	R13		'BIOMASS[e] -->'	Biomass out	R13		'BIOMASS[e] -->'	Biomass out	R13		'BIOMASS[e] -->'	Biomass out
R14		'PRODUCT[e] -->'	Product out	R14		'PRODUCT[e] -->'	Product out	R14		'PRODUCT[e] -->'	Product out	R14		'PRODUCT[e] -->'	Product out	R14		'PRODUCT[e] -->'	Product out
R15		'FOR[c] + H[c] + 0.3 ATP[c] --> FOR[e] + H[e] + 0.3 ADP[c] + 0.3 Pi[c]'	Formate export by ABC transporter	R15		'FOR[c] + H[c] + 0.3 ATP[c] --> FOR[e] + H[e] + 0.3 ADP[c] + 0.3 Pi[c]'	Formate export by ABC transporter	R15		'FOR[c] + H[c] + 0.3 ATP[c] --> FOR[e] + H[e] + 0.3 ADP[c] + 0.3 Pi[c]'	Formate export by ABC transporter	R15		'FOR[c] + H[c] <-- FOR[e] + H[e]'	Formate export by ABC transporter	R15		'FOR[c] + H[c] + 0.3 ATP[c] --> FOR[e] + H[e] + 0.3 ADP[c] + 0.3 Pi[c]'	Formate export by ABC transporter
R16		'AC[c] + H[c] + 0.3 ATP[c] --> AC[e] + H[e] + 0.3 ADP[c] + 0.3 Pi[c]'	Acetate export by ABC transporter	R16		'AC[c] + H[c] + 0.3 ATP[c] --> AC[e] + H[e] + 0.3 ADP[c] + 0.3 Pi[c]'	Acetate export by ABC transporter	R16		'AC[c] + H[c] <-- AC[e] + H[e]'	Acetate export by ABC transporter	R16		'AC[c] + H[c] + 0.3 ATP[c] --> AC[e] + H[e] + 0.3 ADP[c] + 0.3 Pi[c]'	Acetate export by ABC transporter	R16		'AC[c] + H[c] + 0.3 ATP[c] --> AC[e] + H[e] + 0.3 ADP[c] + 0.3 Pi[c]'	Acetate export by ABC transporter
R17		'ETOH[c] --> ETOH[e]'	Ethanol export by diffusion	R17		'ETOH[c] --> ETOH[e]'	Ethanol export by diffusion	R17		'ETOH[c] --> ETOH[e]'	Ethanol export by diffusion	R17		'ETOH[c] --> ETOH[e]'	Ethanol export by diffusion	R17		'ETOH[c] --> ETOH[e]'	Ethanol export by diffusion
R18		'LAC[c] + H[c] + 0.3 ATP[c] --> LAC[e] + H[e] + 0.3 ADP[c] + 0.3 Pi[c]'	Lactate export by ABC transporter	R18		'LAC[c] + H[c] + 0.3 ATP[c] --> LAC[e] + H[e] + 0.3 ADP[c] + 0.3 Pi[c]'	Lactate export by ABC transporter	R18		'LAC[c] + H[c] + 0.3 ATP[c] --> LAC[e] + H[e] + 0.3 ADP[c] + 0.3 Pi[c]'	Lactate export by ABC transporter	R18		'LAC[c] + H[c] + 0.3 ATP[c] --> LAC[e] + H[e] + 0.3 ADP[c] + 0.3 Pi[c]'	Lactate export by ABC transporter	R18		'LAC[c] + H[c] + 0.3 ATP[c] --> LAC[e] + H[e] + 0.3 ADP[c] + 0.3 Pi[c]'	Lactate export by ABC transporter
R19		'ACETONE[c] --> ACETONE[e]'	Acetone export by diffusion	R19		'ACETONE[c] --> ACETONE[e]'	Acetone export by diffusion	R19		'ACETONE[c] --> ACETONE[e]'	Acetone export by diffusion	R19		'ACETONE[c] --> ACETONE[e]'	Acetone export by diffusion	R19		'ACETONE[c] --> ACETONE[e]'	Acetone export by diffusion
R20		'SUC[c] + 2 H[c] + 0.6 ATP[c] --> SUC[e] + 2 H[e] + 0.6 ADP[c] + 0.6 Pi[c]'	Succinate export by ABC transporter	R20		'SUC[c] + 2 H[c] + 0.6 ATP[c] --> SUC[e] + 2 H[e] + 0.6 ADP[c] + 0.6 Pi[c]'	Succinate export by ABC transporter	R20		'SUC[c] + 2 H[c] + 0.6 ATP[c] --> SUC[e] + 2 H[e] + 0.6 ADP[c] + 0.6 Pi[c]'	Succinate export by ABC transporter	R20		'SUC[c] + 2 H[c] + 0.6 ATP[c] --> SUC[e] + 2 H[e] + 0.6 ADP[c] + 0.6 Pi[c]'	Succinate export by ABC transporter	R20		'SUC[c] + 2 H[c] + 0.6 ATP[c] --> SUC[e] + 2 H[e] + 0.6 ADP[c] + 0.6 Pi[c]'	Succinate export by ABC transporter
R21		'BIOMASS[c] --> BIOMASS[e]'	Growth	R21		'BIOMASS[c] --> BIOMASS[e]'	Growth	R21		'BIOMASS[c] --> BIOMASS[e]'	Growth	R21		'BIOMASS[c] --> BIOMASS[e]'	Growth	R21		'BIOMASS[c] --> BIOMASS[e]'	Growth
R22		'P-3HV[c] --> PRODUCT[e]'	Product formation	R22		'P-3HV[c] --> PRODUCT[e]'	Product formation	R22		'P-3HV[c] --> PRODUCT[e]'	Product formation	R22		'P-3HV[c] --> PRODUCT[e]'	Product formation	R22		'P-3HV[c] --> PRODUCT[e]'	Product formation
R23		'O2[e] --> O2[c]'	Oxygen import by diffusion	R23		'O2[e] --> O2[c]'	Oxygen import by diffusion	R23		'O2[e] --> O2[c]'	Oxygen import by diffusion	R23		'O2[e] --> O2[c]'	Oxygen import by diffusion	R23		'O2[e] --> O2[c]'	Oxygen import by diffusion
R24		'NH3[e] --> NH3[c]'	Ammonia import by diffusion	R24		'NH3[e] --> NH3[c]'	Ammonia import by diffusion	R24		'NH3[e] --> NH3[c]'	Ammonia import by diffusion	R24		'NH3[e] --> NH3[c]'	Ammonia import by diffusion	R24		'NH3[e] --> NH3[c]'	Ammonia import by diffusion
R25		'H2[e] --> H2[c]'	Hydrogen import by diffusion	R25		'H2[e] --> H2[c]'	Hydrogen import by diffusion	R25		'H2[e] --> H2[c]'	Hydrogen import by diffusion	R25		'H2[e] --> H2[c]'	Hydrogen import by diffusion	R25		'H2[e] --> H2[c]'	Hydrogen import by diffusion
R26		'CO2[e] <--> CO2[c]'	Carbondioxide import by diffusion	R26		'CO2[e] <--> CO2[c]'	Carbondioxide import by diffusion	R26		'CO2[e] <--> CO2[c]'	Carbondioxide import by diffusion	R26		'CO2[e] <--> CO2[c]'	Carbondioxide import by diffusion	R26		'CO2[e] <--> CO2[c]'	Carbondioxide exchange by diffusion
R27		'FRC[e] + PEP[c] --> F6P[c] + PYR[c]'	PTS [ec:2.7.1.69]	R27		'FRC[e] + PEP[c] --> F6P[c] + PYR[c]'	PTS [ec:2.7.1.69]	R27		'FRC[e] + PEP[c] --> F6P[c] + PYR[c]'	PTS [ec:2.7.1.69]	R27		'FRC[e] + PEP[c] --> F6P[c] + PYR[c]'	PTS [ec:2.7.1.69]	R27		'FRC[e] + PEP[c] --> F6P[c] + PYR[c]'	PTS [ec:2.7.1.69]
R28		'GLY[e] + ATP[c] --> ADP[c] + GLY3P[c]'	Glycerol kinase [ec:2.7.1.30]	R28		'GLY[e] + ATP[c] --> ADP[c] + GLY3P[c]'	Glycerol kinase [ec:2.7.1.30]	R28		'GLY[e] + ATP[c] --> ADP[c] + GLY3P[c]'	Glycerol kinase [ec:2.7.1.30]	R28		'GLY[e] + ATP[c] --> ADP[c] + GLY3P[c]'	Glycerol kinase [ec:2.7.1.30]	R28		'GLY[e] + ATP[c] --> ADP[c] + GLY3P[c]'	Glycerol kinase [ec:2.7.1.30]
R29		'G6P[c] + NADP[c] --> 6-PG-lac[c] + NADPH[c]'	Glucose-6-phosphate dehydrogenase [ec:1.1.1.49]	R29		'G6P[c] + NADP[c] --> 6-PG-lac[c] + NADPH[c]'	Glucose-6-phosphate dehydrogenase [ec:1.1.1.49]	R29		'G6P[c] + NADP[c] --> 6-PG-lac[c] + NADPH[c]'	Glucose-6-phosphate dehydrogenase [ec:1.1.1.49]	R29		'G6P[c] + NADP[c] --> 6-PG-lac[c] + NADPH[c]'	Glucose-6-phosphate dehydrogenase [ec:1.1.1.49]	R29		'G6P[c] + NADP[c] --> 6-PG-lac[c] + NADPH[c]'	Glucose-6-phosphate dehydrogenase [ec:1.1.1.49]
R30		'6-PG-lac[c] --> 6-PG[c]'	6-phosphogluconolactonase [ec:3.1.1.31]	R30		'6-PG-lac[c] --> 6-PG[c]'	6-phosphogluconolactonase [ec:3.1.1.31]	R30		'6-PG-lac[c] --> 6-PG[c]'	6-phosphogluconolactonase [ec:3.1.1.31]	R30		'6-PG-lac[c] --> 6-PG[c]'	6-phosphogluconolactonase [ec:3.1.1.31]	R30		'6-PG-lac[c] --> 6-PG[c]'	6-phosphogluconolactonase [ec:3.1.1.31]
R31		'6-PG[c] --> KDPG[c]'	6-phosphogluconate dehydratase [ec:4.2.1.12]	R31		'6-PG[c] --> KDPG[c]'	6-phosphogluconate dehydratase [ec:4.2.1.12]	R31		'6-PG[c] --> KDPG[c]'	6-phosphogluconate dehydratase [ec:4.2.1.12]	R31		'6-PG[c] --> KDPG[c]'	6-phosphogluconate dehydratase [ec:4.2.1.12]	R31		'6-PG[c] --> KDPG[c]'	6-phosphogluconate dehydratase [ec:4.2.1.12]
R32		'KDPG[c] --> G3P[c] + PYR[c]'	2-keto-3-deoxy-6-phosphogluconate aldolase [ec:4.1.2.14]	R32		'KDPG[c] --> G3P[c] + PYR[c]'	2-keto-3-deoxy-6-phosphogluconate aldolase [ec:4.1.2.14]	R32		'KDPG[c] --> G3P[c] + PYR[c]'	2-keto-3-deoxy-6-phosphogluconate aldolase [ec:4.1.2.14]	R32		'KDPG[c] --> G3P[c] + PYR[c]'	2-keto-3-deoxy-6-phosphogluconate aldolase [ec:4.1.2.14]	R32		'KDPG[c] --> G3P[c] + PYR[c]'	2-keto-3-deoxy-6-phosphogluconate aldolase [ec:4.1.2.14]
R33		'6-PG[c] + NADP[c] --> Ril5P[c] + NADPH[c] + CO2[c]'	6-phosphogluconate dehydrogenase [ec:1.1.1.44]	R33		'6-PG[c] + NADP[c] --> Ril5P[c] + NADPH[c] + CO2[c]'	6-phosphogluconate dehydrogenase [ec:1.1.1.44]	R33		'6-PG[c] + NADP[c] --> Ril5P[c] + NADPH[c] + CO2[c]'	6-phosphogluconate dehydrogenase [ec:1.1.1.44]	R33		'6-PG[c] + NADP[c] --> Ril5P[c] + NADPH[c] + CO2[c]'	6-phosphogluconate dehydrogenase [ec:1.1.1.44]	R33		'6-PG[c] + NADP[c] --> Ril5P[c] + NADPH[c] + CO2[c]'	6-phosphogluconate dehydrogenase [ec:1.1.1.44]
R34		'Ril5P[c] + ATP[c] --> Ril15BP[c] + ADP[c]'	Phosphoribulokinase [ec:2.7.1.19]	R34		'Ril5P[c] + ATP[c] --> Ril15BP[c] + ADP[c]'	Phosphoribulokinase [ec:2.7.1.19]	R34		'Ril5P[c] + ATP[c] --> Ril15BP[c] + ADP[c]'	Phosphoribulokinase [ec:2.7.1.19]	R34		'Ril5P[c] + ATP[c] --> Ril15BP[c] + ADP[c]'	Phosphoribulokinase [ec:2.7.1.19]	R34		'Ril5P[c] + ATP[c] --> Ril15BP[c] + ADP[c]'	Phosphoribulokinase [ec:2.7.1.19]
R35		'5 Ril15BP[c] + 4 CO2[c] + 1 O2[c] --> 9 3-PG[c] + 1 PG[c]'	Ribulose-1,5-bisphosphate carboxylase/oxygenase (RuBisCO) "best case" [ec:4.1.1.39]	R35		'5 Ril15BP[c] + 4 CO2[c] + 1 O2[c] --> 9 3-PG[c] + 1 PG[c]'	Ribulose-1,5-bisphosphate carboxylase/oxygenase (RuBisCO) "best case" [ec:4.1.1.39]	R35		'5 Ril15BP[c] + 4 CO2[c] + 1 O2[c] --> 9 3-PG[c] + 1 PG[c]'	Ribulose-1,5-bisphosphate carboxylase/oxygenase (RuBisCO) "best case" [ec:4.1.1.39]	R35		'5 Ril15BP[c] + 4 CO2[c] + 1 O2[c] --> 9 3-PG[c] + 1 PG[c]'	Ribulose-1,5-bisphosphate carboxylase/oxygenase (RuBisCO) "best case" [ec:4.1.1.39]	R35		'5 Ril15BP[c] + 4 CO2[c] + 1 O2[c] --> 9 3-PG[c] + 1 PG[c]'	Ribulose-1,5-bisphosphate carboxylase/oxygenase (RuBisCO) "best case" [ec:4.1.1.39]
R36		'4 Ril15BP[c] + 3 CO2[c] + 1 O2[c] --> 7 3-PG[c] + 1 PG[c]'	Ribulose-1,5-bisphosphate carboxylase/oxygenase (RuBisCO) "worst case" [ec:4.1.1.39]	R36		'4 Ril15BP[c] + 3 CO2[c] + 1 O2[c] --> 7 3-PG[c] + 1 PG[c]'	Ribulose-1,5-bisphosphate carboxylase/oxygenase (RuBisCO) "worst case" [ec:4.1.1.39]	R36		'4 Ril15BP[c] + 3 CO2[c] + 1 O2[c] --> 7 3-PG[c] + 1 PG[c]'	Ribulose-1,5-bisphosphate carboxylase/oxygenase (RuBisCO) "worst case" [ec:4.1.1.39]	R36		'4 Ril15BP[c] + 3 CO2[c] + 1 O2[c] --> 7 3-PG[c] + 1 PG[c]'	Ribulose-1,5-bisphosphate carboxylase/oxygenase (RuBisCO) "worst case" [ec:4.1.1.39]	R36		'4 Ril15BP[c] + 3 CO2[c] + 1 O2[c] --> 7 3-PG[c] + 1 PG[c]'	Ribulose-1,5-bisphosphate carboxylase/oxygenase (RuBisCO) "worst case" [ec:4.1.1.39]
R37		'PG[c] --> GA[c] + Pi[c]'	2-phosphoglycolate phosphohydrolase [ec:3.1.3.18]	R37		'PG[c] --> GA[c] + Pi[c]'	2-phosphoglycolate phosphohydrolase [ec:3.1.3.18]	R37		'PG[c] --> GA[c] + Pi[c]'	2-phosphoglycolate phosphohydrolase [ec:3.1.3.18]	R37		'PG[c] --> GA[c] + Pi[c]'	2-phosphoglycolate phosphohydrolase [ec:3.1.3.18]	R37		'PG[c] --> GA[c] + Pi[c]'	2-phosphoglycolate phosphohydrolase [ec:3.1.3.18]
R38		'2 GA[c] + O2[c] --> 2 GLYOX[c]'	Glycolate dehydrogenase [ec:1.1.99.14]	R38		'2 GA[c] + O2[c] --> 2 GLYOX[c]'	Glycolate dehydrogenase [ec:1.1.99.14]	R38		'2 GA[c] + O2[c] --> 2 GLYOX[c]'	Glycolate dehydrogenase [ec:1.1.99.14]	R38		'2 GA[c] + O2[c] --> 2 GLYOX[c]'	Glycolate dehydrogenase [ec:1.1.99.14]	R38		'2 GA[c] + O2[c] --> 2 GLYOX[c]'	Glycolate dehydrogenase [ec:1.1.99.14]
R39		'2 GLYOX[c] --> TS[c] + CO2[c]'	Tartronate-semialdehyde synthase [ec:4.1.1.47]	R39		'2 GLYOX[c] --> TS[c] + CO2[c]'	Tartronate-semialdehyde synthase [ec:4.1.1.47]	R39		'2 GLYOX[c] --> TS[c] + CO2[c]'	Tartronate-semialdehyde synthase [ec:4.1.1.47]	R39		'2 GLYOX[c] --> TS[c] + CO2[c]'	Tartronate-semialdehyde synthase [ec:4.1.1.47]	R39		'2 GLYOX[c] --> TS[c] + CO2[c]'	Tartronate-semialdehyde synthase [ec:4.1.1.47]
R40		'TS[c] + NADH[c] --> Glycerate[c] + NAD[c]'	2-hydroxy-3-oxopropionate reductase [ec:1.1.1.60]	R40		'TS[c] + NADH[c] --> Glycerate[c] + NAD[c]'	2-hydroxy-3-oxopropionate reductase [ec:1.1.1.60]	R40		'TS[c] + NADH[c] --> Glycerate[c] + NAD[c]'	2-hydroxy-3-oxopropionate reductase [ec:1.1.1.60]	R40		'TS[c] + NADH[c] --> Glycerate[c] + NAD[c]'	2-hydroxy-3-oxopropionate reductase [ec:1.1.1.60]	R40		'TS[c] + NADH[c] --> Glycerate[c] + NAD[c]'	2-hydroxy-3-oxopropionate reductase [ec:1.1.1.60]
R41		'Glycerate[c] + ATP[c] --> 2-PG[c] + ADP[c]'	Glycerate 2-kinase [ec:2.7.1.165]	R41		'Glycerate[c] + ATP[c] --> 2-PG[c] + ADP[c]'	Glycerate 2-kinase [ec:2.7.1.165]	R41		'Glycerate[c] + ATP[c] --> 2-PG[c] + ADP[c]'	Glycerate 2-kinase [ec:2.7.1.165]	R41		'Glycerate[c] + ATP[c] --> 2-PG[c] + ADP[c]'	Glycerate 2-kinase [ec:2.7.1.165]	R41		'Glycerate[c] + ATP[c] --> 2-PG[c] + ADP[c]'	Glycerate 2-kinase [ec:2.7.1.165]
R42		'Ril5P[c] <--> R5P[c]'	Ribose-5-phosphate isomerase [ec:5.3.1.6]	R42		'Ril5P[c] <--> R5P[c]'	Ribose-5-phosphate isomerase [ec:5.3.1.6]	R42		'Ril5P[c] <--> R5P[c]'	Ribose-5-phosphate isomerase [ec:5.3.1.6]	R42		'Ril5P[c] <--> R5P[c]'	Ribose-5-phosphate isomerase [ec:5.3.1.6]	R42		'Ril5P[c] <--> R5P[c]'	Ribose-5-phosphate isomerase [ec:5.3.1.6]
R43		'Ril5P[c] <--> X5P[c]'	Ribulose-phosphate 3-epimerase [ec:5.1.3.1]	R43		'Ril5P[c] <--> X5P[c]'	Ribulose-phosphate 3-epimerase [ec:5.1.3.1]	R43		'Ril5P[c] <--> X5P[c]'	Ribulose-phosphate 3-epimerase [ec:5.1.3.1]	R43		'Ril5P[c] <--> X5P[c]'	Ribulose-phosphate 3-epimerase [ec:5.1.3.1]	R43		'Ril5P[c] <--> X5P[c]'	Ribulose-phosphate 3-epimerase [ec:5.1.3.1]
R44		'R5P[c] + X5P[c] <--> G3P[c] + S7P[c]'	Transketolase [ec:2.2.1.1]	R44		'R5P[c] + X5P[c] <--> G3P[c] + S7P[c]'	Transketolase [ec:2.2.1.1]	R44		'R5P[c] + X5P[c] <--> G3P[c] + S7P[c]'	Transketolase [ec:2.2.1.1]	R44		'R5P[c] + X5P[c] <--> G3P[c] + S7P[c]'	Transketolase [ec:2.2.1.1]	R44		'R5P[c] + X5P[c] <--> G3P[c] + S7P[c]'	Transketolase [ec:2.2.1.1]
R45		'G3P[c] + S7P[c] <--> E4P[c] + F6P[c]'	Transaldolase [ec:2.2.1.2]	R45		'G3P[c] + S7P[c] <--> E4P[c] + F6P[c]'	Transaldolase [ec:2.2.1.2]	R45		'G3P[c] + S7P[c] <--> E4P[c] + F6P[c]'	Transaldolase [ec:2.2.1.2]	R45		'G3P[c] + S7P[c] <--> E4P[c] + F6P[c]'	Transaldolase [ec:2.2.1.2]	R45		'G3P[c] + S7P[c] <--> E4P[c] + F6P[c]'	Transaldolase [ec:2.2.1.2]
R46		'X5P[c] + E4P[c] <--> F6P[c] + G3P[c]'	Transketolase [ec:2.2.1.1]	R46		'X5P[c] + E4P[c] <--> F6P[c] + G3P[c]'	Transketolase [ec:2.2.1.1]	R46		'X5P[c] + E4P[c] <--> F6P[c] + G3P[c]'	Transketolase [ec:2.2.1.1]	R46		'X5P[c] + E4P[c] <--> F6P[c] + G3P[c]'	Transketolase [ec:2.2.1.1]	R46		'X5P[c] + E4P[c] <--> F6P[c] + G3P[c]'	Transketolase [ec:2.2.1.1]
R47		'G6P[c] <--> F6P[c]'	Glucose-6-phosphate isomerase [ec:5.3.1.9]	R47		'G6P[c] <--> F6P[c]'	Glucose-6-phosphate isomerase [ec:5.3.1.9]	R47		'G6P[c] <--> F6P[c]'	Glucose-6-phosphate isomerase [ec:5.3.1.9]	R47		'G6P[c] <--> F6P[c]'	Glucose-6-phosphate isomerase [ec:5.3.1.9]	R47		'G6P[c] <--> F6P[c]'	Glucose-6-phosphate isomerase [ec:5.3.1.9]
R48		'F16BP[c] --> F6P[c] + Pi[c]'	Fructose-bisphosphatase [ec:3.1.3.11]	R48		'F16BP[c] --> F6P[c] + Pi[c]'	Fructose-bisphosphatase [ec:3.1.3.11]	R48		'F16BP[c] --> F6P[c] + Pi[c]'	Fructose-bisphosphatase [ec:3.1.3.11]	R48		'F16BP[c] --> F6P[c] + Pi[c]'	Fructose-bisphosphatase [ec:3.1.3.11]	R48		'F16BP[c] --> F6P[c] + Pi[c]'	Fructose-bisphosphatase [ec:3.1.3.11]
R49		'F16BP[c] <--> G3P[c] + DHAP[c]'	Fructose-bisphosphate aldolase [ec:4.1.2.13]	R49		'F16BP[c] <--> G3P[c] + DHAP[c]'	Fructose-bisphosphate aldolase [ec:4.1.2.13]	R49		'F16BP[c] <--> G3P[c] + DHAP[c]'	Fructose-bisphosphate aldolase [ec:4.1.2.13]	R49		'F16BP[c] <--> G3P[c] + DHAP[c]'	Fructose-bisphosphate aldolase [ec:4.1.2.13]	R49		'F16BP[c] <--> G3P[c] + DHAP[c]'	Fructose-bisphosphate aldolase [ec:4.1.2.13]
R50		'GLY3P[c] + NAD[c] --> DHAP[c] + NADH[c]'	Glycerol-3-phosphate dehydrogenase [ec:1.1.1.8]	R50		'GLY3P[c] + NAD[c] --> DHAP[c] + NADH[c]'	Glycerol-3-phosphate dehydrogenase [ec:1.1.1.8]	R50		'GLY3P[c] + NAD[c] --> DHAP[c] + NADH[c]'	Glycerol-3-phosphate dehydrogenase [ec:1.1.1.8]	R50		'GLY3P[c] + NAD[c] --> DHAP[c] + NADH[c]'	Glycerol-3-phosphate dehydrogenase [ec:1.1.1.8]	R50		'GLY3P[c] + NAD[c] --> DHAP[c] + NADH[c]'	Glycerol-3-phosphate dehydrogenase [ec:1.1.1.8]
R51		'DHAP[c] <--> G3P[c]'	Triose-phosphate isomerase [ec:5.3.1.1]	R51		'DHAP[c] <--> G3P[c]'	Triose-phosphate isomerase [ec:5.3.1.1]	R51		'DHAP[c] <--> G3P[c]'	Triose-phosphate isomerase [ec:5.3.1.1]	R51		'DHAP[c] <--> G3P[c]'	Triose-phosphate isomerase [ec:5.3.1.1]	R51		'DHAP[c] <--> G3P[c]'	Triose-phosphate isomerase [ec:5.3.1.1]
R52		'G3P[c] + NAD[c] + Pi[c] <--> BPG[c] + NADH[c]'	Glyceraldehyde 3-phosphate dehydrogenase [ec:1.2.1.12]	R52		'G3P[c] + NAD[c] + Pi[c] <--> BPG[c] + NADH[c]'	Glyceraldehyde 3-phosphate dehydrogenase [ec:1.2.1.12]	R52		'G3P[c] + NAD[c] + Pi[c] <--> BPG[c] + NADH[c]'	Glyceraldehyde 3-phosphate dehydrogenase [ec:1.2.1.12]	R52		'G3P[c] + NAD[c] + Pi[c] <--> BPG[c] + NADH[c]'	Glyceraldehyde 3-phosphate dehydrogenase [ec:1.2.1.12]	R52		'G3P[c] + NAD[c] + Pi[c] <--> BPG[c] + NADH[c]'	Glyceraldehyde 3-phosphate dehydrogenase [ec:1.2.1.12]
R53		'BPG[c] + ADP[c] <--> 3-PG[c] + ATP[c]'	Phosphoglycerate kinase [ec:2.7.2.3]	R53		'BPG[c] + ADP[c] <--> 3-PG[c] + ATP[c]'	Phosphoglycerate kinase [ec:2.7.2.3]	R53		'BPG[c] + ADP[c] <--> 3-PG[c] + ATP[c]'	Phosphoglycerate kinase [ec:2.7.2.3]	R53		'BPG[c] + ADP[c] <--> 3-PG[c] + ATP[c]'	Phosphoglycerate kinase [ec:2.7.2.3]	R53		'BPG[c] + ADP[c] <--> 3-PG[c] + ATP[c]'	Phosphoglycerate kinase [ec:2.7.2.3]
R54		'3-PG[c] <--> 2-PG[c]'	Phosphoglycerate mutase [ec:5.4.2.1]	R54		'3-PG[c] <--> 2-PG[c]'	Phosphoglycerate mutase [ec:5.4.2.1]	R54		'3-PG[c] <--> 2-PG[c]'	Phosphoglycerate mutase [ec:5.4.2.1]	R54		'3-PG[c] <--> 2-PG[c]'	Phosphoglycerate mutase [ec:5.4.2.1]	R54		'3-PG[c] <--> 2-PG[c]'	Phosphoglycerate mutase [ec:5.4.2.1]
R55		'2-PG[c] <--> PEP[c]'	Phosphopyruvate hydratase [ec:4.2.1.11]	R55		'2-PG[c] <--> PEP[c]'	Phosphopyruvate hydratase [ec:4.2.1.11]	R55		'2-PG[c] <--> PEP[c]'	Phosphopyruvate hydratase [ec:4.2.1.11]	R55		'2-PG[c] <--> PEP[c]'	Phosphopyruvate hydratase [ec:4.2.1.11]	R55		'2-PG[c] <--> PEP[c]'	Phosphopyruvate hydratase [ec:4.2.1.11]
R56		'PEP[c] + ADP[c] --> PYR[c] + ATP[c]'	Pyruvate kinase [ec:2.7.1.40]	R56		'PEP[c] + ADP[c] --> PYR[c] + ATP[c]'	Pyruvate kinase [ec:2.7.1.40]	R56		'PEP[c] + ADP[c] --> PYR[c] + ATP[c]'	Pyruvate kinase [ec:2.7.1.40]	R56		'PEP[c] + ADP[c] --> PYR[c] + ATP[c]'	Pyruvate kinase [ec:2.7.1.40]	R56		'PEP[c] + ADP[c] --> PYR[c] + ATP[c]'	Pyruvate kinase [ec:2.7.1.40]
R57		'PYR[c] + ATP[c] --> PEP[c] + AMP[c] + Pi[c]'	Phosphoenolpyruvate synthase [ec:2.7.9.2]	R57		'PYR[c] + ATP[c] --> PEP[c] + AMP[c] + Pi[c]'	Phosphoenolpyruvate synthase [ec:2.7.9.2]	R57		'PYR[c] + ATP[c] --> PEP[c] + AMP[c] + Pi[c]'	Phosphoenolpyruvate synthase [ec:2.7.9.2]	R57		'PYR[c] + ATP[c] --> PEP[c] + AMP[c] + Pi[c]'	Phosphoenolpyruvate synthase [ec:2.7.9.2]	R57		'PYR[c] + ATP[c] --> PEP[c] + AMP[c] + Pi[c]'	Phosphoenolpyruvate synthase [ec:2.7.9.2]
R58		'PYR[c] + NAD[c] + H-CoA[c] --> AC-CoA[c] + NADH[c] + CO2[c]'	Pyruvate dehydrogenase complex [ec:1.2.4.1&ec:2.3.1.12&ec:1.8.1.4]	R58		'PYR[c] + NAD[c] + H-CoA[c] --> AC-CoA[c] + NADH[c] + CO2[c]'	Pyruvate dehydrogenase complex [ec:1.2.4.1&ec:2.3.1.12&ec:1.8.1.4]	R58		'PYR[c] + NAD[c] + H-CoA[c] --> AC-CoA[c] + NADH[c] + CO2[c]'	Pyruvate dehydrogenase complex [ec:1.2.4.1&ec:2.3.1.12&ec:1.8.1.4]	R58		'PYR[c] + NAD[c] + H-CoA[c] --> AC-CoA[c] + NADH[c] + CO2[c]'	Pyruvate dehydrogenase complex [ec:1.2.4.1&ec:2.3.1.12&ec:1.8.1.4]	R58		'PYR[c] + NAD[c] + H-CoA[c] --> AC-CoA[c] + NADH[c] + CO2[c]'	Pyruvate dehydrogenase complex [ec:1.2.4.1&ec:2.3.1.12&ec:1.8.1.4]
R59		'PEP[c] + CO2[c] --> OXA[c] + Pi[c]'	Phosphoenolpyruvate carboxylase [ec:4.1.1.31]	R59		'PEP[c] + CO2[c] --> OXA[c] + Pi[c]'	Phosphoenolpyruvate carboxylase [ec:4.1.1.31]	R59		'PEP[c] + CO2[c] --> OXA[c] + Pi[c]'	Phosphoenolpyruvate carboxylase [ec:4.1.1.31]	R59		'PEP[c] + CO2[c] --> OXA[c] + Pi[c]'	Phosphoenolpyruvate carboxylase [ec:4.1.1.31]	R59		'PEP[c] + CO2[c] --> OXA[c] + Pi[c]'	Phosphoenolpyruvate carboxylase [ec:4.1.1.31]
R60		'PYR[c] + ATP[c] + CO2[c] <--> OXA[c] + ADP[c] + Pi[c]'	Pyruvate carboxylase [ec:6.4.1.1]	R60		'PYR[c] + ATP[c] + CO2[c] <--> OXA[c] + ADP[c] + Pi[c]'	Pyruvate carboxylase [ec:6.4.1.1]	R60		'PYR[c] + ATP[c] + CO2[c] <--> OXA[c] + ADP[c] + Pi[c]'	Pyruvate carboxylase [ec:6.4.1.1]	R60		'PYR[c] + ATP[c] + CO2[c] <--> OXA[c] + ADP[c] + Pi[c]'	Pyruvate carboxylase [ec:6.4.1.1]	R60		'PYR[c] + ATP[c] + CO2[c] <--> OXA[c] + ADP[c] + Pi[c]'	Pyruvate carboxylase [ec:6.4.1.1]
R61		'OXA[c] + ATP[c] --> PEP[c] + ADP[c] + CO2[c]'	Phosphoenolpyruvate carboxykinase [ec:4.1.1.49]	R61		'OXA[c] + ATP[c] --> PEP[c] + ADP[c] + CO2[c]'	Phosphoenolpyruvate carboxykinase [ec:4.1.1.49]	R61		'OXA[c] + ATP[c] --> PEP[c] + ADP[c] + CO2[c]'	Phosphoenolpyruvate carboxykinase [ec:4.1.1.49]	R61		'OXA[c] + ATP[c] --> PEP[c] + ADP[c] + CO2[c]'	Phosphoenolpyruvate carboxykinase [ec:4.1.1.49]	R61		'OXA[c] + ATP[c] --> PEP[c] + ADP[c] + CO2[c]'	Phosphoenolpyruvate carboxykinase [ec:4.1.1.49]
R62		'OXA[c] + AC-CoA[c] --> CIT[c] + H-CoA[c]'	Citrate synthase [ec:2.3.3.1]	R62		'OXA[c] + AC-CoA[c] --> CIT[c] + H-CoA[c]'	Citrate synthase [ec:2.3.3.1]	R62		'OXA[c] + AC-CoA[c] --> CIT[c] + H-CoA[c]'	Citrate synthase [ec:2.3.3.1]	R62		'OXA[c] + AC-CoA[c] --> CIT[c] + H-CoA[c]'	Citrate synthase [ec:2.3.3.1]	R62		'OXA[c] + AC-CoA[c] --> CIT[c] + H-CoA[c]'	Citrate synthase [ec:2.3.3.1]
R63		'CIT[c] <--> ISC[c]'	Aconitase [ec:4.2.1.3]	R63		'CIT[c] <--> ISC[c]'	Aconitase [ec:4.2.1.3]	R63		'CIT[c] <--> ISC[c]'	Aconitase [ec:4.2.1.3]	R63		'CIT[c] <--> ISC[c]'	Aconitase [ec:4.2.1.3]	R63		'CIT[c] <--> ISC[c]'	Aconitase [ec:4.2.1.3]
R64		'ISC[c] + NAD[c] --> aKG[c] + NADH[c] + CO2[c]'	Isocitrate dehydrogenase (NAD dependent) [ec:1.1.1.41]	R64		'ISC[c] + NAD[c] --> aKG[c] + NADH[c] + CO2[c]'	Isocitrate dehydrogenase (NAD dependent) [ec:1.1.1.41]	R64		'ISC[c] + NAD[c] --> aKG[c] + NADH[c] + CO2[c]'	Isocitrate dehydrogenase (NAD dependent) [ec:1.1.1.41]	R64		'ISC[c] + NAD[c] --> aKG[c] + NADH[c] + CO2[c]'	Isocitrate dehydrogenase (NAD dependent) [ec:1.1.1.41]	R64		'ISC[c] + NAD[c] --> aKG[c] + NADH[c] + CO2[c]'	Isocitrate dehydrogenase (NAD dependent) [ec:1.1.1.41]
R65		'aKG[c] + H-CoA[c] + NAD[c] --> SUC-CoA[c] + CO2[c] + NADH[c]'	α-ketoglutarate dehydrogenase [ec:1.2.4.2&2.3.1.61]	R65		'aKG[c] + H-CoA[c] + NAD[c] --> SUC-CoA[c] + CO2[c] + NADH[c]'	α-ketoglutarate dehydrogenase [ec:1.2.4.2&2.3.1.61]	R65		'aKG[c] + H-CoA[c] + NAD[c] --> SUC-CoA[c] + CO2[c] + NADH[c]'	α-ketoglutarate dehydrogenase [ec:1.2.4.2&2.3.1.61]	R65		'aKG[c] + H-CoA[c] + NAD[c] --> SUC-CoA[c] + CO2[c] + NADH[c]'	α-ketoglutarate dehydrogenase [ec:1.2.4.2&2.3.1.61]	R65		'aKG[c] + H-CoA[c] + NAD[c] --> SUC-CoA[c] + CO2[c] + NADH[c]'	α-ketoglutarate dehydrogenase [ec:1.2.4.2&2.3.1.61]
R66		'SUC-CoA[c] + ADP[c] + Pi[c] <--> SUC[c] + H-CoA[c] + ATP[c]'	Succinyl-CoA synthetase [ec:6.2.1.5]	R66		'SUC-CoA[c] + ADP[c] + Pi[c] <--> SUC[c] + H-CoA[c] + ATP[c]'	Succinyl-CoA synthetase [ec:6.2.1.5]	R66		'SUC-CoA[c] + ADP[c] + Pi[c] <--> SUC[c] + H-CoA[c] + ATP[c]'	Succinyl-CoA synthetase [ec:6.2.1.5]	R66		'SUC-CoA[c] + ADP[c] + Pi[c] <--> SUC[c] + H-CoA[c] + ATP[c]'	Succinyl-CoA synthetase [ec:6.2.1.5]	R66		'SUC-CoA[c] + ADP[c] + Pi[c] <--> SUC[c] + H-CoA[c] + ATP[c]'	Succinyl-CoA synthetase [ec:6.2.1.5]
R67		'SUC[c] + FAD[c] <--> FUM[c] + FADH2[c]'	Fumarate reductase [ec:1.3.5.4]	R67		'SUC[c] + FAD[c] <--> FUM[c] + FADH2[c]'	Fumarate reductase [ec:1.3.5.4]	R67		'SUC[c] + FAD[c] <--> FUM[c] + FADH2[c]'	Fumarate reductase [ec:1.3.5.4]	R67		'SUC[c] + FAD[c] <--> FUM[c] + FADH2[c]'	Fumarate reductase [ec:1.3.5.4]	R67		'SUC[c] + FAD[c] <--> FUM[c] + FADH2[c]'	Fumarate reductase [ec:1.3.5.4]
R68		'SUC[c] + UQ[c] --> FUM[c] + UQH2[c]'	Succinate dehydrogenase [ec:1.3.5.1]	R68		'SUC[c] + UQ[c] --> FUM[c] + UQH2[c]'	Succinate dehydrogenase [ec:1.3.5.1]	R68		'SUC[c] + UQ[c] --> FUM[c] + UQH2[c]'	Succinate dehydrogenase [ec:1.3.5.1]	R68		'SUC[c] + UQ[c] --> FUM[c] + UQH2[c]'	Succinate dehydrogenase [ec:1.3.5.1]	R68		'SUC[c] + UQ[c] --> FUM[c] + UQH2[c]'	Succinate dehydrogenase [ec:1.3.5.1]
R69		'FUM[c] <--> MAL[c]'	Fumarase [ec:4.2.1.2]	R69		'FUM[c] <--> MAL[c]'	Fumarase [ec:4.2.1.2]	R69		'FUM[c] <--> MAL[c]'	Fumarase [ec:4.2.1.2]	R69		'FUM[c] <--> MAL[c]'	Fumarase [ec:4.2.1.2]	R69		'FUM[c] <--> MAL[c]'	Fumarase [ec:4.2.1.2]
R70		'MAL[c] + NAD[c] <--> OXA[c] + NADH[c]'	Malate dehydrogenase [ec:1.1.1.37]	R70		'MAL[c] + NAD[c] <--> OXA[c] + NADH[c]'	Malate dehydrogenase [ec:1.1.1.37]	R70		'MAL[c] + NAD[c] <--> OXA[c] + NADH[c]'	Malate dehydrogenase [ec:1.1.1.37]	R70		'MAL[c] + NAD[c] <--> OXA[c] + NADH[c]'	Malate dehydrogenase [ec:1.1.1.37]	R70		'MAL[c] + NAD[c] <--> OXA[c] + NADH[c]'	Malate dehydrogenase [ec:1.1.1.37]
R71		'MAL[c] + NADP[c] --> PYR[c] + CO2[c] + NADPH[c]'	Malic enzyme (NADP dependent) [ec:1.1.1.40]	R71		'MAL[c] + NADP[c] --> PYR[c] + CO2[c] + NADPH[c]'	Malic enzyme (NADP dependent) [ec:1.1.1.40]	R71		'MAL[c] + NADP[c] --> PYR[c] + CO2[c] + NADPH[c]'	Malic enzyme (NADP dependent) [ec:1.1.1.40]	R71		'MAL[c] + NADP[c] --> PYR[c] + CO2[c] + NADPH[c]'	Malic enzyme (NADP dependent) [ec:1.1.1.40]	R71		'MAL[c] + NADP[c] --> PYR[c] + CO2[c] + NADPH[c]'	Malic enzyme (NADP dependent) [ec:1.1.1.40]
R72		'ISC[c] --> GLYOX[c] + SUC[c]'	Isocitrate lyase [ec:4.1.3.1]	R72		'ISC[c] --> GLYOX[c] + SUC[c]'	Isocitrate lyase [ec:4.1.3.1]	R72		'ISC[c] --> GLYOX[c] + SUC[c]'	Isocitrate lyase [ec:4.1.3.1]	R72		'ISC[c] --> GLYOX[c] + SUC[c]'	Isocitrate lyase [ec:4.1.3.1]	R72		'ISC[c] --> GLYOX[c] + SUC[c]'	Isocitrate lyase [ec:4.1.3.1]
R73		'GLYOX[c] + AC-CoA[c] --> MAL[c] + H-CoA[c]'	Malate synthase [ec:2.3.3.9]	R73		'GLYOX[c] + AC-CoA[c] --> MAL[c] + H-CoA[c]'	Malate synthase [ec:2.3.3.9]	R73		'GLYOX[c] + AC-CoA[c] --> MAL[c] + H-CoA[c]'	Malate synthase [ec:2.3.3.9]	R73		'GLYOX[c] + AC-CoA[c] --> MAL[c] + H-CoA[c]'	Malate synthase [ec:2.3.3.9]	R73		'GLYOX[c] + AC-CoA[c] --> MAL[c] + H-CoA[c]'	Malate synthase [ec:2.3.3.9]
R74		'AC[c] + H-CoA[c] + ATP[c] --> AC-CoA[c] + AMP[c] + 2 Pi[c]'	Acetyl-CoA synthetase [ec:6.2.1.1]	R74		'AC[c] + H-CoA[c] + ATP[c] --> AC-CoA[c] + AMP[c] + 2 Pi[c]'	Acetyl-CoA synthetase [ec:6.2.1.1]	R74		'AC[c] + H-CoA[c] + ATP[c] --> AC-CoA[c] + AMP[c] + 2 Pi[c]'	Acetyl-CoA synthetase [ec:6.2.1.1]	R74		'AC[c] + H-CoA[c] + ATP[c] --> AC-CoA[c] + AMP[c] + 2 Pi[c]'	Acetyl-CoA synthetase [ec:6.2.1.1]	R74		'AC[c] + H-CoA[c] + ATP[c] --> AC-CoA[c] + AMP[c] + 2 Pi[c]'	Acetyl-CoA synthetase [ec:6.2.1.1]
R75		'2 AC-CoA[c] <--> ACAC-CoA[c] + H-CoA[c]'	Acetoacetyl-CoA thiolase [ec:2.3.1.9]	R75		'2 AC-CoA[c] <--> ACAC-CoA[c] + H-CoA[c]'	Acetoacetyl-CoA thiolase [ec:2.3.1.9]	R75		'2 AC-CoA[c] <--> ACAC-CoA[c] + H-CoA[c]'	Acetoacetyl-CoA thiolase [ec:2.3.1.9]	R75		'2 AC-CoA[c] <--> ACAC-CoA[c] + H-CoA[c]'	Acetoacetyl-CoA thiolase [ec:2.3.1.9]	R75		'2 AC-CoA[c] <--> ACAC-CoA[c] + H-CoA[c]'	Acetoacetyl-CoA thiolase [ec:2.3.1.9]
R76		'AC-CoA[c] + SUC[c] --> AC[c] + SUC-CoA[c]'	Succinyl-CoA:acetate CoA-transferase [ec:2.8.3.18]	R76		'AC-CoA[c] + SUC[c] --> AC[c] + SUC-CoA[c]'	Succinyl-CoA:acetate CoA-transferase [ec:2.8.3.18]	R76		'AC-CoA[c] + SUC[c] --> AC[c] + SUC-CoA[c]'	Succinyl-CoA:acetate CoA-transferase [ec:2.8.3.18]	R76		'AC-CoA[c] + SUC[c] --> AC[c] + SUC-CoA[c]'	Succinyl-CoA:acetate CoA-transferase [ec:2.8.3.18]	R76		'AC-CoA[c] + SUC[c] --> AC[c] + SUC-CoA[c]'	Succinyl-CoA:acetate CoA-transferase [ec:2.8.3.18]
R77		'ACAC[c] + SUC-CoA[c] <--> ACAC-CoA[c] + SUC[c]'	3-Oxoacid CoA-transferase [ec:2.8.3.5]	R77		'ACAC[c] + SUC-CoA[c] <--> ACAC-CoA[c] + SUC[c]'	3-Oxoacid CoA-transferase [ec:2.8.3.5]	R77		'ACAC[c] + SUC-CoA[c] <--> ACAC-CoA[c] + SUC[c]'	3-Oxoacid CoA-transferase [ec:2.8.3.5]	R77		'ACAC[c] + SUC-CoA[c] <--> ACAC-CoA[c] + SUC[c]'	3-Oxoacid CoA-transferase [ec:2.8.3.5]	R77		'ACAC[c] + SUC-CoA[c] <--> ACAC-CoA[c] + SUC[c]'	3-Oxoacid CoA-transferase [ec:2.8.3.5]
R78		'PYR[c] + H-CoA[c] --> AC-CoA[c] + FOR[c]'	Pyruvate formate lyase [ec:2.3.1.54]	R78		'PYR[c] + H-CoA[c] --> AC-CoA[c] + FOR[c]'	Pyruvate formate lyase [ec:2.3.1.54]	R78		'PYR[c] + H-CoA[c] --> AC-CoA[c] + FOR[c]'	Pyruvate formate lyase [ec:2.3.1.54]	R78		'PYR[c] + H-CoA[c] --> AC-CoA[c] + FOR[c]'	Pyruvate formate lyase [ec:2.3.1.54]	R78		'PYR[c] + H-CoA[c] --> AC-CoA[c] + FOR[c]'	Pyruvate formate lyase [ec:2.3.1.54]
R79		'FOR[c] + NAD[c] --> CO2[c] + NADH[c]'	Formate dehydrogenase [ec:1.17.1.9]	R79		'FOR[c] + NAD[c] --> CO2[c] + NADH[c]'	Formate dehydrogenase [ec:1.17.1.9]	R79		'FOR[c] + NAD[c] --> CO2[c] + NADH[c]'	Formate dehydrogenase [ec:1.17.1.9]	R79		'FOR[c] + NAD[c] --> CO2[c] + NADH[c]'	Formate dehydrogenase [ec:1.17.1.9]	R79		'FOR[c] + NAD[c] --> CO2[c] + NADH[c]'	Formate dehydrogenase [ec:1.17.1.9]
R80		'H-CoA[c] + ACP[c] --> AC-CoA[c] + Pi[c]'	Phosphate acetyltransferase [ec:2.3.1.8]	R80		'H-CoA[c] + ACP[c] --> AC-CoA[c] + Pi[c]'	Phosphate acetyltransferase [ec:2.3.1.8]	R80		'H-CoA[c] + ACP[c] --> AC-CoA[c] + Pi[c]'	Phosphate acetyltransferase [ec:2.3.1.8]	R80		'H-CoA[c] + ACP[c] --> AC-CoA[c] + Pi[c]'	Phosphate acetyltransferase [ec:2.3.1.8]	R80		'H-CoA[c] + ACP[c] --> AC-CoA[c] + Pi[c]'	Phosphate acetyltransferase [ec:2.3.1.8]
R81		'ACP[c] + ADP[c] --> AC[c] + ATP[c]'	Acetate kinase [ec:2.7.2.1]	R81		'ACP[c] + ADP[c] --> AC[c] + ATP[c]'	Acetate kinase [ec:2.7.2.1]	R81		'ACP[c] + ADP[c] --> AC[c] + ATP[c]'	Acetate kinase [ec:2.7.2.1]	R81		'ACP[c] + ADP[c] --> AC[c] + ATP[c]'	Acetate kinase [ec:2.7.2.1]	R81		'ACP[c] + ADP[c] --> AC[c] + ATP[c]'	Acetate kinase [ec:2.7.2.1]
R82		'AC-CoA[c] + NADH[c] <--> ACA[c] + NAD[c] + H-CoA[c]'	Acetaldehyde dehydrogenase [ec:1.2.1.10]	R82		'AC-CoA[c] + NADH[c] <--> ACA[c] + NAD[c] + H-CoA[c]'	Acetaldehyde dehydrogenase [ec:1.2.1.10]	R82		'AC-CoA[c] + NADH[c] <--> ACA[c] + NAD[c] + H-CoA[c]'	Acetaldehyde dehydrogenase [ec:1.2.1.10]	R82		'AC-CoA[c] + NADH[c] <--> ACA[c] + NAD[c] + H-CoA[c]'	Acetaldehyde dehydrogenase [ec:1.2.1.10]	R82		'AC-CoA[c] + NADH[c] <--> ACA[c] + NAD[c] + H-CoA[c]'	Acetaldehyde dehydrogenase [ec:1.2.1.10]
R83		'ACA[c] + NAD[c] --> AC[c] + NADH[c]'	Aldehyde dehydrogenase (NAD dependent) [ec:1.2.1.3]	R83		'ACA[c] + NAD[c] --> AC[c] + NADH[c]'	Aldehyde dehydrogenase (NAD dependent) [ec:1.2.1.3]	R83		'ACA[c] + NAD[c] --> AC[c] + NADH[c]'	Aldehyde dehydrogenase (NAD dependent) [ec:1.2.1.3]	R83		'ACA[c] + NAD[c] --> AC[c] + NADH[c]'	Aldehyde dehydrogenase (NAD dependent) [ec:1.2.1.3]	R83		'ACA[c] + NAD[c] --> AC[c] + NADH[c]'	Aldehyde dehydrogenase (NAD dependent) [ec:1.2.1.3]
R84		'ACA[c] + NADH[c] --> ETOH[c] + NAD[c]'	Alcohol dehydrogenase [ec:1.1.1.1]	R84		'ACA[c] + NADH[c] --> ETOH[c] + NAD[c]'	Alcohol dehydrogenase [ec:1.1.1.1]	R84		'ACA[c] + NADH[c] --> ETOH[c] + NAD[c]'	Alcohol dehydrogenase [ec:1.1.1.1]	R84		'ACA[c] + NADH[c] --> ETOH[c] + NAD[c]'	Alcohol dehydrogenase [ec:1.1.1.1]	R84		'ACA[c] + NADH[c] --> ETOH[c] + NAD[c]'	Alcohol dehydrogenase [ec:1.1.1.1]
R85		'PYR[c] + NADH[c] --> LAC[c] + NAD[c]'	Lactate dehydrogenase [ec:1.1.1.27]	R85		'PYR[c] + NADH[c] --> LAC[c] + NAD[c]'	Lactate dehydrogenase [ec:1.1.1.27]	R85		'PYR[c] + NADH[c] --> LAC[c] + NAD[c]'	Lactate dehydrogenase [ec:1.1.1.27]	R85		'PYR[c] + NADH[c] --> LAC[c] + NAD[c]'	Lactate dehydrogenase [ec:1.1.1.27]	R85		'PYR[c] + NADH[c] --> LAC[c] + NAD[c]'	Lactate dehydrogenase [ec:1.1.1.27]
R86		'ACAC[c] --> ACETONE[c] + CO2[c]'	Acetoacetate decarboxylase [ec:4.1.1.4]	R86		'ACAC[c] --> ACETONE[c] + CO2[c]'	Acetoacetate decarboxylase [ec:4.1.1.4]	R86		'ACAC[c] --> ACETONE[c] + CO2[c]'	Acetoacetate decarboxylase [ec:4.1.1.4]	R86		'ACAC[c] --> ACETONE[c] + CO2[c]'	Acetoacetate decarboxylase [ec:4.1.1.4]	R86		'ACAC[c] --> ACETONE[c] + CO2[c]'	Acetoacetate decarboxylase [ec:4.1.1.4]
R87		'ACAC-CoA[c] + NADPH[c] <--> 3-HBut-CoA[c] + NADP[c]'	3-Hydroxyacyl-CoA dehydrogenase [ec:1.1.1.35]	R87		'ACAC-CoA[c] + NADPH[c] <--> 3-HBut-CoA[c] + NADP[c]'	3-Hydroxyacyl-CoA dehydrogenase [ec:1.1.1.35]	R87		'ACAC-CoA[c] + NADPH[c] <--> 3-HBut-CoA[c] + NADP[c]'	3-Hydroxyacyl-CoA dehydrogenase [ec:1.1.1.35]	R87		'ACAC-CoA[c] + NADPH[c] <--> 3-HBut-CoA[c] + NADP[c]'	3-Hydroxyacyl-CoA dehydrogenase [ec:1.1.1.35]	R87		'ACAC-CoA[c] + NADPH[c] <--> 3-HBut-CoA[c] + NADP[c]'	3-Hydroxyacyl-CoA dehydrogenase [ec:1.1.1.35]
R88		'3-HBut-CoA[c] --> PHB[c] + H-CoA[c]'	Poly(3-hydroxybutyrate) synthase [ec:2.3.1.-]	R88		'3-HBut-CoA[c] --> PHB[c] + H-CoA[c]'	Poly(3-hydroxybutyrate) synthase [ec:2.3.1.-]	R88		'3-HBut-CoA[c] --> PHB[c] + H-CoA[c]'	Poly(3-hydroxybutyrate) synthase [ec:2.3.1.-]	R88		'3-HBut-CoA[c] --> PHB[c] + H-CoA[c]'	Poly(3-hydroxybutyrate) synthase [ec:2.3.1.-]	R88		'3-HBut-CoA[c] --> PHB[c] + H-CoA[c]'	Poly(3-hydroxybutyrate) synthase [ec:2.3.1.-]
R89		'PHB[c] + NAD[c] --> ACAC[c] + NADH[c]'	PHA depolymerase [ec:3.1.1.75]	R89		'PHB[c] + NAD[c] --> ACAC[c] + NADH[c]'	PHA depolymerase [ec:3.1.1.75]	R89		'PHB[c] + NAD[c] --> ACAC[c] + NADH[c]'	PHA depolymerase [ec:3.1.1.75]	R89		'PHB[c] + NAD[c] --> ACAC[c] + NADH[c]'	PHA depolymerase [ec:3.1.1.75]	R89		'PHB[c] + NAD[c] --> ACAC[c] + NADH[c]'	PHA depolymerase [ec:3.1.1.75]
R90		'aKG[c] + NADPH[c] + NH3[c] <--> GLU[c] + NADP[c]'	Glutamate dehydrogenase [ec:1.4.1.2]	R90		'aKG[c] + NADPH[c] + NH3[c] <--> GLU[c] + NADP[c]'	Glutamate dehydrogenase [ec:1.4.1.2]	R90		'aKG[c] + NADPH[c] + NH3[c] <--> GLU[c] + NADP[c]'	Glutamate dehydrogenase [ec:1.4.1.2]	R90		'aKG[c] + NADPH[c] + NH3[c] <--> GLU[c] + NADP[c]'	Glutamate dehydrogenase [ec:1.4.1.2]	R90		'aKG[c] + NADPH[c] + NH3[c] <--> GLU[c] + NADP[c]'	Glutamate dehydrogenase [ec:1.4.1.2]
R91		'GLU[c] + NH3[c] + ATP[c] <--> GLN[c] + ADP[c] + Pi[c]'	Glutamine synthase [ec:6.3.1.2]	R91		'GLU[c] + NH3[c] + ATP[c] <--> GLN[c] + ADP[c] + Pi[c]'	Glutamine synthase [ec:6.3.1.2]	R91		'GLU[c] + NH3[c] + ATP[c] <--> GLN[c] + ADP[c] + Pi[c]'	Glutamine synthase [ec:6.3.1.2]	R91		'GLU[c] + NH3[c] + ATP[c] <--> GLN[c] + ADP[c] + Pi[c]'	Glutamine synthase [ec:6.3.1.2]	R91		'GLU[c] + NH3[c] + ATP[c] <--> GLN[c] + ADP[c] + Pi[c]'	Glutamine synthase [ec:6.3.1.2]
R92		'0.021 G6P[c] + 0.007 F6P[c] + 0.09 R5P[c] + 0.036 E4P[c] + 0.013 G3P[c] + 0.15 3-PG[c] + 0.052 PEP[c] + 0.283 PYR[c] + 0.374 AC-CoA[c] + 0.179 OXA[c] + 0.832 GLU[c] + 0.025 GLN[c] + 4.11 ATP[c] + 0.826 NADPH[c] + 0.312 NAD[c] --> BIOMASS[c] + 0.751 aKG[c] + 0.261 CO2[c] + 0.374 H-CoA[c] + 4.11 ADP[c] + 4.479 Pi[c] + 0.826 NADP[c] + 0.312 NADH[c]'	Biomass formation	R92		'0.021 G6P[c] + 0.007 F6P[c] + 0.09 R5P[c] + 0.036 E4P[c] + 0.013 G3P[c] + 0.15 3-PG[c] + 0.052 PEP[c] + 0.283 PYR[c] + 0.374 AC-CoA[c] + 0.179 OXA[c] + 0.832 GLU[c] + 0.025 GLN[c] + 4.11 ATP[c] + 0.826 NADPH[c] + 0.312 NAD[c] --> BIOMASS[c] + 0.751 aKG[c] + 0.261 CO2[c] + 0.374 H-CoA[c] + 4.11 ADP[c] + 4.479 Pi[c] + 0.826 NADP[c] + 0.312 NADH[c]'	Biomass formation	R92		'0.021 G6P[c] + 0.007 F6P[c] + 0.09 R5P[c] + 0.036 E4P[c] + 0.013 G3P[c] + 0.15 3-PG[c] + 0.052 PEP[c] + 0.283 PYR[c] + 0.374 AC-CoA[c] + 0.179 OXA[c] + 0.832 GLU[c] + 0.025 GLN[c] + 4.11 ATP[c] + 0.826 NADPH[c] + 0.312 NAD[c] --> BIOMASS[c] + 0.751 aKG[c] + 0.261 CO2[c] + 0.374 H-CoA[c] + 4.11 ADP[c] + 4.479 Pi[c] + 0.826 NADP[c] + 0.312 NADH[c]'	Biomass formation	R92		'0.021 G6P[c] + 0.007 F6P[c] + 0.09 R5P[c] + 0.036 E4P[c] + 0.013 G3P[c] + 0.15 3-PG[c] + 0.052 PEP[c] + 0.283 PYR[c] + 0.374 AC-CoA[c] + 0.179 OXA[c] + 0.832 GLU[c] + 0.025 GLN[c] + 4.11 ATP[c] + 0.826 NADPH[c] + 0.312 NAD[c] --> BIOMASS[c] + 0.751 aKG[c] + 0.261 CO2[c] + 0.374 H-CoA[c] + 4.11 ADP[c] + 4.479 Pi[c] + 0.826 NADP[c] + 0.312 NADH[c]'	Biomass formation	R92		'0.021 G6P[c] + 0.007 F6P[c] + 0.09 R5P[c] + 0.036 E4P[c] + 0.013 G3P[c] + 0.15 3-PG[c] + 0.052 PEP[c] + 0.283 PYR[c] + 0.374 AC-CoA[c] + 0.179 OXA[c] + 0.832 GLU[c] + 0.025 GLN[c] + 4.11 ATP[c] + 0.826 NADPH[c] + 0.312 NAD[c] --> BIOMASS[c] + 0.751 aKG[c] + 0.261 CO2[c] + 0.374 H-CoA[c] + 4.11 ADP[c] + 4.479 Pi[c] + 0.826 NADP[c] + 0.312 NADH[c]'	Biomass formation
R93		'NADH[c] + FAD[c] --> NAD[c] + FADH2[c]'	Flavin reductase (NAD dependent) [ec:1.5.1.36]	R93		'NADH[c] + FAD[c] --> NAD[c] + FADH2[c]'	Flavin reductase (NAD dependent) [ec:1.5.1.36]	R93		'NADH[c] + FAD[c] --> NAD[c] + FADH2[c]'	Flavin reductase (NAD dependent) [ec:1.5.1.36]	R93		'NADH[c] + FAD[c] --> NAD[c] + FADH2[c]'	Flavin reductase (NAD dependent) [ec:1.5.1.36]	R93		'NADH[c] + FAD[c] --> NAD[c] + FADH2[c]'	Flavin reductase (NAD dependent) [ec:1.5.1.36]
R94		'NADPH[c] + NAD[c] --> NADP[c] + NADH[c]'	NAD(P) transhydrogenase [ec:1.6.1.3]	R94		'NADPH[c] + NAD[c] --> NADP[c] + NADH[c]'	NAD(P) transhydrogenase [ec:1.6.1.3]	R94		'NADPH[c] + NAD[c] --> NADP[c] + NADH[c]'	NAD(P) transhydrogenase [ec:1.6.1.3]	R94		'NADPH[c] + NAD[c] --> NADP[c] + NADH[c]'	NAD(P) transhydrogenase [ec:1.6.1.3]	R94		'NADPH[c] + NAD[c] --> NADP[c] + NADH[c]'	NAD(P) transhydrogenase [ec:1.6.1.3]
R95		'NADH[c] + NADP[c] + H[e] --> NAD[c] + NADPH[c] + H[c]'	NAD(P) transhydrogenase (Re/Si-specific) [ec:1.6.1.2]	R95		'NADH[c] + NADP[c] + H[e] --> NAD[c] + NADPH[c] + H[c]'	NAD(P) transhydrogenase (Re/Si-specific) [ec:1.6.1.2]	R95		'NADH[c] + NADP[c] + H[e] --> NAD[c] + NADPH[c] + H[c]'	NAD(P) transhydrogenase (Re/Si-specific) [ec:1.6.1.2]	R95		'NADH[c] + NADP[c] + H[e] --> NAD[c] + NADPH[c] + H[c]'	NAD(P) transhydrogenase (Re/Si-specific) [ec:1.6.1.2]	R95		'NADH[c] + NADP[c] + H[e] --> NAD[c] + NADPH[c] + H[c]'	NAD(P) transhydrogenase (Re/Si-specific) [ec:1.6.1.2]
R96		'H2[c] + NAD[c] --> NADH[c]'	Hydrogen dehydrogenase [ec:1.12.1.2]	R96		'H2[c] + NAD[c] --> NADH[c]'	Hydrogen dehydrogenase [ec:1.12.1.2]	R96		'H2[c] + NAD[c] --> NADH[c]'	Hydrogen dehydrogenase [ec:1.12.1.2]	R96		'H2[c] + NAD[c] --> NADH[c]'	Hydrogen dehydrogenase [ec:1.12.1.2]	R96		'H2[c] + NAD[c] --> NADH[c]'	Hydrogen dehydrogenase [ec:1.12.1.2]
R97		'UQ[c] + H2[c] --> UQH2[c]'	Hydrogen dehydrogenase [ec:1.12.99.6]	R97		'UQ[c] + H2[c] --> UQH2[c]'	Hydrogen dehydrogenase [ec:1.12.99.6]	R97		'UQ[c] + H2[c] --> UQH2[c]'	Hydrogen dehydrogenase [ec:1.12.99.6]	R97		'UQ[c] + H2[c] --> UQH2[c]'	Hydrogen dehydrogenase [ec:1.12.99.6]	R97		'UQ[c] + H2[c] --> UQH2[c]'	Hydrogen dehydrogenase [ec:1.12.99.6]
R98		'NADH[c] + UQ[c] --> NAD[c] + UQH2[c]'	NADH-quinone oxidoreductase [ec:1.6.5.9]	R98		'NADH[c] + UQ[c] --> NAD[c] + UQH2[c]'	NADH-quinone oxidoreductase [ec:1.6.5.9]	R98		'NADH[c] + UQ[c] --> NAD[c] + UQH2[c]'	NADH-quinone oxidoreductase [ec:1.6.5.9]	R98		'NADH[c] + UQ[c] --> NAD[c] + UQH2[c]'	NADH-quinone oxidoreductase [ec:1.6.5.9]	R98		'NADH[c] + UQ[c] --> NAD[c] + UQH2[c]'	NADH-quinone oxidoreductase [ec:1.6.5.9]
R99		'NADH[c] + UQ[c] + 4 H[c] --> NAD[c] + UQH2[c] + 4 H[e]'	NADH-quinone oxidoreductase [ec:7.1.1.2]	R99		'NADH[c] + UQ[c] + 4 H[c] --> NAD[c] + UQH2[c] + 4 H[e]'	NADH-quinone oxidoreductase [ec:7.1.1.2]	R99		'NADH[c] + UQ[c] + 4 H[c] --> NAD[c] + UQH2[c] + 4 H[e]'	NADH-quinone oxidoreductase [ec:7.1.1.2]	R99		'NADH[c] + UQ[c] + 4 H[c] --> NAD[c] + UQH2[c] + 4 H[e]'	NADH-quinone oxidoreductase [ec:7.1.1.2]	R99		'NADH[c] + UQ[c] + 4 H[c] --> NAD[c] + UQH2[c] + 4 H[e]'	NADH-quinone oxidoreductase [ec:7.1.1.2]
R100		'UQH2[c] + 4 H[c] + 0.5 O2[c] --> UQ[c] + 4 H[e]'	Cytochrome bd oxidase [ec:7.1.1.7]	R100		'UQH2[c] + 4 H[c] + 0.5 O2[c] --> UQ[c] + 4 H[e]'	Cytochrome bd oxidase [ec:7.1.1.7]	R100		'UQH2[c] + 4 H[c] + 0.5 O2[c] --> UQ[c] + 4 H[e]'	Cytochrome bd oxidase [ec:7.1.1.7]	R100		'UQH2[c] + 4 H[c] + 0.5 O2[c] --> UQ[c] + 4 H[e]'	Cytochrome bd oxidase [ec:7.1.1.7]	R100		'UQH2[c] + 4 H[c] + 0.5 O2[c] --> UQ[c] + 4 H[e]'	Cytochrome bd oxidase [ec:7.1.1.7]
R101		'UQH2[c] + 2 H[c] + 0.5 O2[c] --> UQ[c] + 2 H[e]'	Cytochrome bo oxidase [ec:7.1.1.3]	R101		'UQH2[c] + 2 H[c] + 0.5 O2[c] --> UQ[c] + 2 H[e]'	Cytochrome bo oxidase [ec:7.1.1.3]	R101		'UQH2[c] + 2 H[c] + 0.5 O2[c] --> UQ[c] + 2 H[e]'	Cytochrome bo oxidase [ec:7.1.1.3]	R101		'UQH2[c] + 2 H[c] + 0.5 O2[c] --> UQ[c] + 2 H[e]'	Cytochrome bo oxidase [ec:7.1.1.3]	R101		'UQH2[c] + 2 H[c] + 0.5 O2[c] --> UQ[c] + 2 H[e]'	Cytochrome bo oxidase [ec:7.1.1.3]
R102		'ADP[c] + 4 H[e] + Pi[c] --> ATP[c] + 4 H[c]'	ATP synthase [ec:3.6.3.14]	R102		'ADP[c] + 4 H[e] + Pi[c] --> ATP[c] + 4 H[c]'	ATP synthase [ec:3.6.3.14]	R102		'ADP[c] + 4 H[e] + Pi[c] --> ATP[c] + 4 H[c]'	ATP synthase [ec:3.6.3.14]	R102		'ADP[c] + 4 H[e] + Pi[c] --> ATP[c] + 4 H[c]'	ATP synthase [ec:3.6.3.14]	R102		'ADP[c] + 4 H[e] + Pi[c] --> ATP[c] + 4 H[c]'	ATP synthase [ec:3.6.3.14]
R103		'ADP[c] + 3 H[e] + Pi[c] <-- ATP[c] + 3 H[c]'	reverse ATP synthase (proton pump) [ec:3.6.3.14]	R103		'ADP[c] + 3 H[e] + Pi[c] <-- ATP[c] + 3 H[c]'	reverse ATP synthase (proton pump) [ec:3.6.3.14]	R103		'ADP[c] + 3 H[e] + Pi[c] <-- ATP[c] + 3 H[c]'	reverse ATP synthase (proton pump) [ec:3.6.3.14]	R103		'ADP[c] + 3 H[e] + Pi[c] <-- ATP[c] + 3 H[c]'	reverse ATP synthase (proton pump) [ec:3.6.3.14]	R103		'ADP[c] + 3 H[e] + Pi[c] <-- ATP[c] + 3 H[c]'	reverse ATP synthase (proton pump) [ec:3.6.3.14]
R104		'AMP[c] + ATP[c] --> 2 ADP[c]'	Adenylate kinase [ec:2.7.4.3]	R104		'AMP[c] + ATP[c] --> 2 ADP[c]'	Adenylate kinase [ec:2.7.4.3]	R104		'AMP[c] + ATP[c] --> 2 ADP[c]'	Adenylate kinase [ec:2.7.4.3]	R104		'AMP[c] + ATP[c] --> 2 ADP[c]'	Adenylate kinase [ec:2.7.4.3]	R104		'AMP[c] + ATP[c] --> 2 ADP[c]'	Adenylate kinase [ec:2.7.4.3]
R105		'SUC-CoA[c] --> MeMalonyl-CoA[c]'	Methylmalonyl-CoA mutase [ec:5.4.99.2]	R105		'SUC-CoA[c] --> MeMalonyl-CoA[c]'	Methylmalonyl-CoA mutase [ec:5.4.99.2]	R105		'SUC-CoA[c] --> MeMalonyl-CoA[c]'	Methylmalonyl-CoA mutase [ec:5.4.99.2]	R105		'SUC-CoA[c] --> MeMalonyl-CoA[c]'	Methylmalonyl-CoA mutase [ec:5.4.99.2]	R105		'SUC-CoA[c] --> MeMalonyl-CoA[c]'	Methylmalonyl-CoA mutase [ec:5.4.99.2]
R106		'PYR[c] + MeMalonyl-CoA[c] --> OXA[c] + Propionyl-CoA[c]'	Methylmalonyl-CoA carboxytransferase [ec:2.1.3.1]	R106		'PYR[c] + MeMalonyl-CoA[c] --> OXA[c] + Propionyl-CoA[c]'	Methylmalonyl-CoA carboxytransferase [ec:2.1.3.1]	R106		'PYR[c] + MeMalonyl-CoA[c] --> OXA[c] + Propionyl-CoA[c]'	Methylmalonyl-CoA carboxytransferase [ec:2.1.3.1]	R106		'PYR[c] + MeMalonyl-CoA[c] --> OXA[c] + Propionyl-CoA[c]'	Methylmalonyl-CoA carboxytransferase [ec:2.1.3.1]	R106		'PYR[c] + MeMalonyl-CoA[c] --> OXA[c] + Propionyl-CoA[c]'	Methylmalonyl-CoA carboxytransferase [ec:2.1.3.1]
R107		'AC-CoA[c] + Propionyl-CoA[c] --> AcPropionyl-CoA[c] + H-CoA[c]'	Acetopropionyl-CoA thiolase	R107		'AC-CoA[c] + Propionyl-CoA[c] --> AcPropionyl-CoA[c] + H-CoA[c]'	Acetopropionyl-CoA thiolase	R107		'AC-CoA[c] + Propionyl-CoA[c] --> AcPropionyl-CoA[c] + H-CoA[c]'	Acetopropionyl-CoA thiolase	R107		'AC-CoA[c] + Propionyl-CoA[c] --> AcPropionyl-CoA[c] + H-CoA[c]'	Acetopropionyl-CoA thiolase	R107		'AC-CoA[c] + Propionyl-CoA[c] --> AcPropionyl-CoA[c] + H-CoA[c]'	Acetopropionyl-CoA thiolase
R108		'AcPropionyl-CoA[c] + NADH[c] --> 3-Hydroxypentanoyl-CoA[c] + NAD[c]'	3-Hydroxypentanoyl-CoA:NAD oxidoreductase	R108		'AcPropionyl-CoA[c] + NADH[c] --> 3-Hydroxypentanoyl-CoA[c] + NAD[c]'	3-Hydroxypentanoyl-CoA:NAD oxidoreductase	R108		'AcPropionyl-CoA[c] + NADH[c] --> 3-Hydroxypentanoyl-CoA[c] + NAD[c]'	3-Hydroxypentanoyl-CoA:NAD oxidoreductase	R108		'AcPropionyl-CoA[c] + NADH[c] --> 3-Hydroxypentanoyl-CoA[c] + NAD[c]'	3-Hydroxypentanoyl-CoA:NAD oxidoreductase	R108		'AcPropionyl-CoA[c] + NADH[c] --> 3-Hydroxypentanoyl-CoA[c] + NAD[c]'	3-Hydroxypentanoyl-CoA:NAD oxidoreductase
R109		'3-Hydroxypentanoyl-CoA[c] --> P-3HV[c] + H-CoA[c]'	Poly(3-hydroxyalkanoate) synthase [ec:2.3.1.-]	R109		'3-Hydroxypentanoyl-CoA[c] --> P-3HV[c] + H-CoA[c]'	Poly(3-hydroxyalkanoate) synthase [ec:2.3.1.-]	R109		'3-Hydroxypentanoyl-CoA[c] --> P-3HV[c] + H-CoA[c]'	Poly(3-hydroxyalkanoate) synthase [ec:2.3.1.-]	R109		'3-Hydroxypentanoyl-CoA[c] --> P-3HV[c] + H-CoA[c]'	Poly(3-hydroxyalkanoate) synthase [ec:2.3.1.-]	R109		'3-Hydroxypentanoyl-CoA[c] --> P-3HV[c] + H-CoA[c]'	Poly(3-hydroxyalkanoate) synthase [ec:2.3.1.-]
	};				};				};				};				};
	mnet = CalculateFluxModes(ReactionFormulas,CreateFluxModeOpts('parse-only',true));				mnet = CalculateFluxModes(ReactionFormulas,CreateFluxModeOpts('parse-only',true));				mnet = CalculateFluxModes(ReactionFormulas,CreateFluxModeOpts('parse-only',true));				mnet = CalculateFluxModes(ReactionFormulas,CreateFluxModeOpts('parse-only',true));				mnet = CalculateFluxModes(ReactionFormulas,CreateFluxModeOpts('parse-only',true));

## Sheet: P5HV
	C. necator on Fructose + CO2				C. necator on Glycerol + CO2				C. necator on Acetate + CO2				C. necator on Formate + CO2				C. necator on CO2 + H2
RxN		Equation	Function / Enzyme	RxN		Equation	Function / Enzyme	RxN		Equation	Function / Enzyme	RxN		Equation	Function / Enzyme	RxN		Equation	Function / Enzyme
R1	ReactionFormulas = {	'--> CO2[e]'	Carbondioxide in	R1	ReactionFormulas = {	'--> CO2[e]'	Carbondioxide in	R1	ReactionFormulas = {	'--> CO2[e]'	Carbondioxide in	R1	ReactionFormulas = {	'--> CO2[e]'	Carbondioxide in	R1	ReactionFormulas = {	'--> CO2[e]'	Carbondioxide in
R2		'--> FRC[e]'	Fructose in	R2		'--> GLY[e]'	Fructose in	R2		'--> AC[e]'	Fructose in	R2		'--> FOR[e]'	Fructose in	R2		'--> H2[e]'	Hydrogen in
R3		'--> NH3[e]'	Ammonia in	R3		'--> NH3[e]'	Ammonia in	R3		'--> NH3[e]'	Ammonia in	R3		'--> NH3[e]'	Ammonia in	R3		'--> NH3[e]'	Ammonia in
R4		'--> O2[e]'	Oxygen in	R4		'--> O2[e]'	Oxygen in	R4		'--> O2[e]'	Oxygen in	R4		'--> O2[e]'	Oxygen in	R4		'--> O2[e]'	Oxygen in
R5		'CO2[e] -->'	Carbondioxide out	R5		'CO2[e] -->'	Carbondioxide out	R5		'CO2[e] -->'	Carbondioxide out	R5		'CO2[e] -->'	Carbondioxide out	R5		'CO2[e] -->'	Carbondioxide out
R6		'FOR[e] -->'	Formate out	R6		'FOR[e] -->'	Formate out	R6		'FOR[e] -->'	Formate out	R6		'FOR[e] -->'	Formate out	R6		'FOR[e] -->'	Formate out
R7		'AC[e] -->'	Acetate out	R7		'AC[e] -->'	Acetate out	R7		'AC[e] -->'	Acetate out	R7		'AC[e] -->'	Acetate out	R7		'AC[e] -->'	Acetate out
R8		'ETOH[e] -->'	Ethanol out	R8		'ETOH[e] -->'	Ethanol out	R8		'ETOH[e] -->'	Ethanol out	R8		'ETOH[e] -->'	Ethanol out	R8		'ETOH[e] -->'	Ethanol out
R9		'LAC[e] -->'	Lactate out	R9		'LAC[e] -->'	Lactate out	R9		'LAC[e] -->'	Lactate out	R9		'LAC[e] -->'	Lactate out	R9		'LAC[e] -->'	Lactate out
R10		'ACETONE[e] -->'	Acetone out	R10		'ACETONE[e] -->'	Acetone out	R10		'ACETONE[e] -->'	Acetone out	R10		'ACETONE[e] -->'	Acetone out	R10		'ACETONE[e] -->'	Acetone out
R11		'SUC[e] -->'	Succinate out	R11		'SUC[e] -->'	Succinate out	R11		'SUC[e] -->'	Succinate out	R11		'SUC[e] -->'	Succinate out	R11		'SUC[e] -->'	Succinate out
R12		'PHB[e] -->'	Polyhydroxybutyrate out	R12		'PHB[e] -->'	Polyhydroxybutyrate out	R12		'PHB[e] -->'	Polyhydroxybutyrate out	R12		'PHB[e] -->'	Polyhydroxybutyrate out	R12		'PHB[e] -->'	Polyhydroxybutyrate out
R13		'BIOMASS[e] -->'	Biomass out	R13		'BIOMASS[e] -->'	Biomass out	R13		'BIOMASS[e] -->'	Biomass out	R13		'BIOMASS[e] -->'	Biomass out	R13		'BIOMASS[e] -->'	Biomass out
R14		'PRODUCT[e] -->'	Product out	R14		'PRODUCT[e] -->'	Product out	R14		'PRODUCT[e] -->'	Product out	R14		'PRODUCT[e] -->'	Product out	R14		'PRODUCT[e] -->'	Product out
R15		'FOR[c] + H[c] + 0.3 ATP[c] --> FOR[e] + H[e] + 0.3 ADP[c] + 0.3 Pi[c]'	Formate export by ABC transporter	R15		'FOR[c] + H[c] + 0.3 ATP[c] --> FOR[e] + H[e] + 0.3 ADP[c] + 0.3 Pi[c]'	Formate export by ABC transporter	R15		'FOR[c] + H[c] + 0.3 ATP[c] --> FOR[e] + H[e] + 0.3 ADP[c] + 0.3 Pi[c]'	Formate export by ABC transporter	R15		'FOR[c] + H[c] <-- FOR[e] + H[e]'	Formate export by ABC transporter	R15		'FOR[c] + H[c] + 0.3 ATP[c] --> FOR[e] + H[e] + 0.3 ADP[c] + 0.3 Pi[c]'	Formate export by ABC transporter
R16		'AC[c] + H[c] + 0.3 ATP[c] --> AC[e] + H[e] + 0.3 ADP[c] + 0.3 Pi[c]'	Acetate export by ABC transporter	R16		'AC[c] + H[c] + 0.3 ATP[c] --> AC[e] + H[e] + 0.3 ADP[c] + 0.3 Pi[c]'	Acetate export by ABC transporter	R16		'AC[c] + H[c] <-- AC[e] + H[e]'	Acetate export by ABC transporter	R16		'AC[c] + H[c] + 0.3 ATP[c] --> AC[e] + H[e] + 0.3 ADP[c] + 0.3 Pi[c]'	Acetate export by ABC transporter	R16		'AC[c] + H[c] + 0.3 ATP[c] --> AC[e] + H[e] + 0.3 ADP[c] + 0.3 Pi[c]'	Acetate export by ABC transporter
R17		'ETOH[c] --> ETOH[e]'	Ethanol export by diffusion	R17		'ETOH[c] --> ETOH[e]'	Ethanol export by diffusion	R17		'ETOH[c] --> ETOH[e]'	Ethanol export by diffusion	R17		'ETOH[c] --> ETOH[e]'	Ethanol export by diffusion	R17		'ETOH[c] --> ETOH[e]'	Ethanol export by diffusion
R18		'LAC[c] + H[c] + 0.3 ATP[c] --> LAC[e] + H[e] + 0.3 ADP[c] + 0.3 Pi[c]'	Lactate export by ABC transporter	R18		'LAC[c] + H[c] + 0.3 ATP[c] --> LAC[e] + H[e] + 0.3 ADP[c] + 0.3 Pi[c]'	Lactate export by ABC transporter	R18		'LAC[c] + H[c] + 0.3 ATP[c] --> LAC[e] + H[e] + 0.3 ADP[c] + 0.3 Pi[c]'	Lactate export by ABC transporter	R18		'LAC[c] + H[c] + 0.3 ATP[c] --> LAC[e] + H[e] + 0.3 ADP[c] + 0.3 Pi[c]'	Lactate export by ABC transporter	R18		'LAC[c] + H[c] + 0.3 ATP[c] --> LAC[e] + H[e] + 0.3 ADP[c] + 0.3 Pi[c]'	Lactate export by ABC transporter
R19		'ACETONE[c] --> ACETONE[e]'	Acetone export by diffusion	R19		'ACETONE[c] --> ACETONE[e]'	Acetone export by diffusion	R19		'ACETONE[c] --> ACETONE[e]'	Acetone export by diffusion	R19		'ACETONE[c] --> ACETONE[e]'	Acetone export by diffusion	R19		'ACETONE[c] --> ACETONE[e]'	Acetone export by diffusion
R20		'SUC[c] + 2 H[c] + 0.6 ATP[c] --> SUC[e] + 2 H[e] + 0.6 ADP[c] + 0.6 Pi[c]'	Succinate export by ABC transporter	R20		'SUC[c] + 2 H[c] + 0.6 ATP[c] --> SUC[e] + 2 H[e] + 0.6 ADP[c] + 0.6 Pi[c]'	Succinate export by ABC transporter	R20		'SUC[c] + 2 H[c] + 0.6 ATP[c] --> SUC[e] + 2 H[e] + 0.6 ADP[c] + 0.6 Pi[c]'	Succinate export by ABC transporter	R20		'SUC[c] + 2 H[c] + 0.6 ATP[c] --> SUC[e] + 2 H[e] + 0.6 ADP[c] + 0.6 Pi[c]'	Succinate export by ABC transporter	R20		'SUC[c] + 2 H[c] + 0.6 ATP[c] --> SUC[e] + 2 H[e] + 0.6 ADP[c] + 0.6 Pi[c]'	Succinate export by ABC transporter
R21		'BIOMASS[c] --> BIOMASS[e]'	Growth	R21		'BIOMASS[c] --> BIOMASS[e]'	Growth	R21		'BIOMASS[c] --> BIOMASS[e]'	Growth	R21		'BIOMASS[c] --> BIOMASS[e]'	Growth	R21		'BIOMASS[c] --> BIOMASS[e]'	Growth
R22		'P-5HV[c] --> PRODUCT[e]'	Product formation	R22		'P-5HV[c] --> PRODUCT[e]'	Product formation	R22		'P-5HV[c] --> PRODUCT[e]'	Product formation	R22		'P-5HV[c] --> PRODUCT[e]'	Product formation	R22		'P-5HV[c] --> PRODUCT[e]'	Product formation
R23		'O2[e] --> O2[c]'	Oxygen import by diffusion	R23		'O2[e] --> O2[c]'	Oxygen import by diffusion	R23		'O2[e] --> O2[c]'	Oxygen import by diffusion	R23		'O2[e] --> O2[c]'	Oxygen import by diffusion	R23		'O2[e] --> O2[c]'	Oxygen import by diffusion
R24		'NH3[e] --> NH3[c]'	Ammonia import by diffusion	R24		'NH3[e] --> NH3[c]'	Ammonia import by diffusion	R24		'NH3[e] --> NH3[c]'	Ammonia import by diffusion	R24		'NH3[e] --> NH3[c]'	Ammonia import by diffusion	R24		'NH3[e] --> NH3[c]'	Ammonia import by diffusion
R25		'H2[e] --> H2[c]'	Hydrogen import by diffusion	R25		'H2[e] --> H2[c]'	Hydrogen import by diffusion	R25		'H2[e] --> H2[c]'	Hydrogen import by diffusion	R25		'H2[e] --> H2[c]'	Hydrogen import by diffusion	R25		'H2[e] --> H2[c]'	Hydrogen import by diffusion
R26		'CO2[e] <--> CO2[c]'	Carbondioxide import by diffusion	R26		'CO2[e] <--> CO2[c]'	Carbondioxide import by diffusion	R26		'CO2[e] <--> CO2[c]'	Carbondioxide import by diffusion	R26		'CO2[e] <--> CO2[c]'	Carbondioxide import by diffusion	R26		'CO2[e] <--> CO2[c]'	Carbondioxide exchange by diffusion
R27		'FRC[e] + PEP[c] --> F6P[c] + PYR[c]'	PTS [ec:2.7.1.69]	R27		'FRC[e] + PEP[c] --> F6P[c] + PYR[c]'	PTS [ec:2.7.1.69]	R27		'FRC[e] + PEP[c] --> F6P[c] + PYR[c]'	PTS [ec:2.7.1.69]	R27		'FRC[e] + PEP[c] --> F6P[c] + PYR[c]'	PTS [ec:2.7.1.69]	R27		'FRC[e] + PEP[c] --> F6P[c] + PYR[c]'	PTS [ec:2.7.1.69]
R28		'GLY[e] + ATP[c] --> ADP[c] + GLY3P[c]'	Glycerol kinase [ec:2.7.1.30]	R28		'GLY[e] + ATP[c] --> ADP[c] + GLY3P[c]'	Glycerol kinase [ec:2.7.1.30]	R28		'GLY[e] + ATP[c] --> ADP[c] + GLY3P[c]'	Glycerol kinase [ec:2.7.1.30]	R28		'GLY[e] + ATP[c] --> ADP[c] + GLY3P[c]'	Glycerol kinase [ec:2.7.1.30]	R28		'GLY[e] + ATP[c] --> ADP[c] + GLY3P[c]'	Glycerol kinase [ec:2.7.1.30]
R29		'G6P[c] + NADP[c] --> 6-PG-lac[c] + NADPH[c]'	Glucose-6-phosphate dehydrogenase [ec:1.1.1.49]	R29		'G6P[c] + NADP[c] --> 6-PG-lac[c] + NADPH[c]'	Glucose-6-phosphate dehydrogenase [ec:1.1.1.49]	R29		'G6P[c] + NADP[c] --> 6-PG-lac[c] + NADPH[c]'	Glucose-6-phosphate dehydrogenase [ec:1.1.1.49]	R29		'G6P[c] + NADP[c] --> 6-PG-lac[c] + NADPH[c]'	Glucose-6-phosphate dehydrogenase [ec:1.1.1.49]	R29		'G6P[c] + NADP[c] --> 6-PG-lac[c] + NADPH[c]'	Glucose-6-phosphate dehydrogenase [ec:1.1.1.49]
R30		'6-PG-lac[c] --> 6-PG[c]'	6-phosphogluconolactonase [ec:3.1.1.31]	R30		'6-PG-lac[c] --> 6-PG[c]'	6-phosphogluconolactonase [ec:3.1.1.31]	R30		'6-PG-lac[c] --> 6-PG[c]'	6-phosphogluconolactonase [ec:3.1.1.31]	R30		'6-PG-lac[c] --> 6-PG[c]'	6-phosphogluconolactonase [ec:3.1.1.31]	R30		'6-PG-lac[c] --> 6-PG[c]'	6-phosphogluconolactonase [ec:3.1.1.31]
R31		'6-PG[c] --> KDPG[c]'	6-phosphogluconate dehydratase [ec:4.2.1.12]	R31		'6-PG[c] --> KDPG[c]'	6-phosphogluconate dehydratase [ec:4.2.1.12]	R31		'6-PG[c] --> KDPG[c]'	6-phosphogluconate dehydratase [ec:4.2.1.12]	R31		'6-PG[c] --> KDPG[c]'	6-phosphogluconate dehydratase [ec:4.2.1.12]	R31		'6-PG[c] --> KDPG[c]'	6-phosphogluconate dehydratase [ec:4.2.1.12]
R32		'KDPG[c] --> G3P[c] + PYR[c]'	2-keto-3-deoxy-6-phosphogluconate aldolase [ec:4.1.2.14]	R32		'KDPG[c] --> G3P[c] + PYR[c]'	2-keto-3-deoxy-6-phosphogluconate aldolase [ec:4.1.2.14]	R32		'KDPG[c] --> G3P[c] + PYR[c]'	2-keto-3-deoxy-6-phosphogluconate aldolase [ec:4.1.2.14]	R32		'KDPG[c] --> G3P[c] + PYR[c]'	2-keto-3-deoxy-6-phosphogluconate aldolase [ec:4.1.2.14]	R32		'KDPG[c] --> G3P[c] + PYR[c]'	2-keto-3-deoxy-6-phosphogluconate aldolase [ec:4.1.2.14]
R33		'6-PG[c] + NADP[c] --> Ril5P[c] + NADPH[c] + CO2[c]'	6-phosphogluconate dehydrogenase [ec:1.1.1.44]	R33		'6-PG[c] + NADP[c] --> Ril5P[c] + NADPH[c] + CO2[c]'	6-phosphogluconate dehydrogenase [ec:1.1.1.44]	R33		'6-PG[c] + NADP[c] --> Ril5P[c] + NADPH[c] + CO2[c]'	6-phosphogluconate dehydrogenase [ec:1.1.1.44]	R33		'6-PG[c] + NADP[c] --> Ril5P[c] + NADPH[c] + CO2[c]'	6-phosphogluconate dehydrogenase [ec:1.1.1.44]	R33		'6-PG[c] + NADP[c] --> Ril5P[c] + NADPH[c] + CO2[c]'	6-phosphogluconate dehydrogenase [ec:1.1.1.44]
R34		'Ril5P[c] + ATP[c] --> Ril15BP[c] + ADP[c]'	Phosphoribulokinase [ec:2.7.1.19]	R34		'Ril5P[c] + ATP[c] --> Ril15BP[c] + ADP[c]'	Phosphoribulokinase [ec:2.7.1.19]	R34		'Ril5P[c] + ATP[c] --> Ril15BP[c] + ADP[c]'	Phosphoribulokinase [ec:2.7.1.19]	R34		'Ril5P[c] + ATP[c] --> Ril15BP[c] + ADP[c]'	Phosphoribulokinase [ec:2.7.1.19]	R34		'Ril5P[c] + ATP[c] --> Ril15BP[c] + ADP[c]'	Phosphoribulokinase [ec:2.7.1.19]
R35		'5 Ril15BP[c] + 4 CO2[c] + 1 O2[c] --> 9 3-PG[c] + 1 PG[c]'	Ribulose-1,5-bisphosphate carboxylase/oxygenase (RuBisCO) "best case" [ec:4.1.1.39]	R35		'5 Ril15BP[c] + 4 CO2[c] + 1 O2[c] --> 9 3-PG[c] + 1 PG[c]'	Ribulose-1,5-bisphosphate carboxylase/oxygenase (RuBisCO) "best case" [ec:4.1.1.39]	R35		'5 Ril15BP[c] + 4 CO2[c] + 1 O2[c] --> 9 3-PG[c] + 1 PG[c]'	Ribulose-1,5-bisphosphate carboxylase/oxygenase (RuBisCO) "best case" [ec:4.1.1.39]	R35		'5 Ril15BP[c] + 4 CO2[c] + 1 O2[c] --> 9 3-PG[c] + 1 PG[c]'	Ribulose-1,5-bisphosphate carboxylase/oxygenase (RuBisCO) "best case" [ec:4.1.1.39]	R35		'5 Ril15BP[c] + 4 CO2[c] + 1 O2[c] --> 9 3-PG[c] + 1 PG[c]'	Ribulose-1,5-bisphosphate carboxylase/oxygenase (RuBisCO) "best case" [ec:4.1.1.39]
R36		'4 Ril15BP[c] + 3 CO2[c] + 1 O2[c] --> 7 3-PG[c] + 1 PG[c]'	Ribulose-1,5-bisphosphate carboxylase/oxygenase (RuBisCO) "worst case" [ec:4.1.1.39]	R36		'4 Ril15BP[c] + 3 CO2[c] + 1 O2[c] --> 7 3-PG[c] + 1 PG[c]'	Ribulose-1,5-bisphosphate carboxylase/oxygenase (RuBisCO) "worst case" [ec:4.1.1.39]	R36		'4 Ril15BP[c] + 3 CO2[c] + 1 O2[c] --> 7 3-PG[c] + 1 PG[c]'	Ribulose-1,5-bisphosphate carboxylase/oxygenase (RuBisCO) "worst case" [ec:4.1.1.39]	R36		'4 Ril15BP[c] + 3 CO2[c] + 1 O2[c] --> 7 3-PG[c] + 1 PG[c]'	Ribulose-1,5-bisphosphate carboxylase/oxygenase (RuBisCO) "worst case" [ec:4.1.1.39]	R36		'4 Ril15BP[c] + 3 CO2[c] + 1 O2[c] --> 7 3-PG[c] + 1 PG[c]'	Ribulose-1,5-bisphosphate carboxylase/oxygenase (RuBisCO) "worst case" [ec:4.1.1.39]
R37		'PG[c] --> GA[c] + Pi[c]'	2-phosphoglycolate phosphohydrolase [ec:3.1.3.18]	R37		'PG[c] --> GA[c] + Pi[c]'	2-phosphoglycolate phosphohydrolase [ec:3.1.3.18]	R37		'PG[c] --> GA[c] + Pi[c]'	2-phosphoglycolate phosphohydrolase [ec:3.1.3.18]	R37		'PG[c] --> GA[c] + Pi[c]'	2-phosphoglycolate phosphohydrolase [ec:3.1.3.18]	R37		'PG[c] --> GA[c] + Pi[c]'	2-phosphoglycolate phosphohydrolase [ec:3.1.3.18]
R38		'2 GA[c] + O2[c] --> 2 GLYOX[c]'	Glycolate dehydrogenase [ec:1.1.99.14]	R38		'2 GA[c] + O2[c] --> 2 GLYOX[c]'	Glycolate dehydrogenase [ec:1.1.99.14]	R38		'2 GA[c] + O2[c] --> 2 GLYOX[c]'	Glycolate dehydrogenase [ec:1.1.99.14]	R38		'2 GA[c] + O2[c] --> 2 GLYOX[c]'	Glycolate dehydrogenase [ec:1.1.99.14]	R38		'2 GA[c] + O2[c] --> 2 GLYOX[c]'	Glycolate dehydrogenase [ec:1.1.99.14]
R39		'2 GLYOX[c] --> TS[c] + CO2[c]'	Tartronate-semialdehyde synthase [ec:4.1.1.47]	R39		'2 GLYOX[c] --> TS[c] + CO2[c]'	Tartronate-semialdehyde synthase [ec:4.1.1.47]	R39		'2 GLYOX[c] --> TS[c] + CO2[c]'	Tartronate-semialdehyde synthase [ec:4.1.1.47]	R39		'2 GLYOX[c] --> TS[c] + CO2[c]'	Tartronate-semialdehyde synthase [ec:4.1.1.47]	R39		'2 GLYOX[c] --> TS[c] + CO2[c]'	Tartronate-semialdehyde synthase [ec:4.1.1.47]
R40		'TS[c] + NADH[c] --> Glycerate[c] + NAD[c]'	2-hydroxy-3-oxopropionate reductase [ec:1.1.1.60]	R40		'TS[c] + NADH[c] --> Glycerate[c] + NAD[c]'	2-hydroxy-3-oxopropionate reductase [ec:1.1.1.60]	R40		'TS[c] + NADH[c] --> Glycerate[c] + NAD[c]'	2-hydroxy-3-oxopropionate reductase [ec:1.1.1.60]	R40		'TS[c] + NADH[c] --> Glycerate[c] + NAD[c]'	2-hydroxy-3-oxopropionate reductase [ec:1.1.1.60]	R40		'TS[c] + NADH[c] --> Glycerate[c] + NAD[c]'	2-hydroxy-3-oxopropionate reductase [ec:1.1.1.60]
R41		'Glycerate[c] + ATP[c] --> 2-PG[c] + ADP[c]'	Glycerate 2-kinase [ec:2.7.1.165]	R41		'Glycerate[c] + ATP[c] --> 2-PG[c] + ADP[c]'	Glycerate 2-kinase [ec:2.7.1.165]	R41		'Glycerate[c] + ATP[c] --> 2-PG[c] + ADP[c]'	Glycerate 2-kinase [ec:2.7.1.165]	R41		'Glycerate[c] + ATP[c] --> 2-PG[c] + ADP[c]'	Glycerate 2-kinase [ec:2.7.1.165]	R41		'Glycerate[c] + ATP[c] --> 2-PG[c] + ADP[c]'	Glycerate 2-kinase [ec:2.7.1.165]
R42		'Ril5P[c] <--> R5P[c]'	Ribose-5-phosphate isomerase [ec:5.3.1.6]	R42		'Ril5P[c] <--> R5P[c]'	Ribose-5-phosphate isomerase [ec:5.3.1.6]	R42		'Ril5P[c] <--> R5P[c]'	Ribose-5-phosphate isomerase [ec:5.3.1.6]	R42		'Ril5P[c] <--> R5P[c]'	Ribose-5-phosphate isomerase [ec:5.3.1.6]	R42		'Ril5P[c] <--> R5P[c]'	Ribose-5-phosphate isomerase [ec:5.3.1.6]
R43		'Ril5P[c] <--> X5P[c]'	Ribulose-phosphate 3-epimerase [ec:5.1.3.1]	R43		'Ril5P[c] <--> X5P[c]'	Ribulose-phosphate 3-epimerase [ec:5.1.3.1]	R43		'Ril5P[c] <--> X5P[c]'	Ribulose-phosphate 3-epimerase [ec:5.1.3.1]	R43		'Ril5P[c] <--> X5P[c]'	Ribulose-phosphate 3-epimerase [ec:5.1.3.1]	R43		'Ril5P[c] <--> X5P[c]'	Ribulose-phosphate 3-epimerase [ec:5.1.3.1]
R44		'R5P[c] + X5P[c] <--> G3P[c] + S7P[c]'	Transketolase [ec:2.2.1.1]	R44		'R5P[c] + X5P[c] <--> G3P[c] + S7P[c]'	Transketolase [ec:2.2.1.1]	R44		'R5P[c] + X5P[c] <--> G3P[c] + S7P[c]'	Transketolase [ec:2.2.1.1]	R44		'R5P[c] + X5P[c] <--> G3P[c] + S7P[c]'	Transketolase [ec:2.2.1.1]	R44		'R5P[c] + X5P[c] <--> G3P[c] + S7P[c]'	Transketolase [ec:2.2.1.1]
R45		'G3P[c] + S7P[c] <--> E4P[c] + F6P[c]'	Transaldolase [ec:2.2.1.2]	R45		'G3P[c] + S7P[c] <--> E4P[c] + F6P[c]'	Transaldolase [ec:2.2.1.2]	R45		'G3P[c] + S7P[c] <--> E4P[c] + F6P[c]'	Transaldolase [ec:2.2.1.2]	R45		'G3P[c] + S7P[c] <--> E4P[c] + F6P[c]'	Transaldolase [ec:2.2.1.2]	R45		'G3P[c] + S7P[c] <--> E4P[c] + F6P[c]'	Transaldolase [ec:2.2.1.2]
R46		'X5P[c] + E4P[c] <--> F6P[c] + G3P[c]'	Transketolase [ec:2.2.1.1]	R46		'X5P[c] + E4P[c] <--> F6P[c] + G3P[c]'	Transketolase [ec:2.2.1.1]	R46		'X5P[c] + E4P[c] <--> F6P[c] + G3P[c]'	Transketolase [ec:2.2.1.1]	R46		'X5P[c] + E4P[c] <--> F6P[c] + G3P[c]'	Transketolase [ec:2.2.1.1]	R46		'X5P[c] + E4P[c] <--> F6P[c] + G3P[c]'	Transketolase [ec:2.2.1.1]
R47		'G6P[c] <--> F6P[c]'	Glucose-6-phosphate isomerase [ec:5.3.1.9]	R47		'G6P[c] <--> F6P[c]'	Glucose-6-phosphate isomerase [ec:5.3.1.9]	R47		'G6P[c] <--> F6P[c]'	Glucose-6-phosphate isomerase [ec:5.3.1.9]	R47		'G6P[c] <--> F6P[c]'	Glucose-6-phosphate isomerase [ec:5.3.1.9]	R47		'G6P[c] <--> F6P[c]'	Glucose-6-phosphate isomerase [ec:5.3.1.9]
R48		'F16BP[c] --> F6P[c] + Pi[c]'	Fructose-bisphosphatase [ec:3.1.3.11]	R48		'F16BP[c] --> F6P[c] + Pi[c]'	Fructose-bisphosphatase [ec:3.1.3.11]	R48		'F16BP[c] --> F6P[c] + Pi[c]'	Fructose-bisphosphatase [ec:3.1.3.11]	R48		'F16BP[c] --> F6P[c] + Pi[c]'	Fructose-bisphosphatase [ec:3.1.3.11]	R48		'F16BP[c] --> F6P[c] + Pi[c]'	Fructose-bisphosphatase [ec:3.1.3.11]
R49		'F16BP[c] <--> G3P[c] + DHAP[c]'	Fructose-bisphosphate aldolase [ec:4.1.2.13]	R49		'F16BP[c] <--> G3P[c] + DHAP[c]'	Fructose-bisphosphate aldolase [ec:4.1.2.13]	R49		'F16BP[c] <--> G3P[c] + DHAP[c]'	Fructose-bisphosphate aldolase [ec:4.1.2.13]	R49		'F16BP[c] <--> G3P[c] + DHAP[c]'	Fructose-bisphosphate aldolase [ec:4.1.2.13]	R49		'F16BP[c] <--> G3P[c] + DHAP[c]'	Fructose-bisphosphate aldolase [ec:4.1.2.13]
R50		'GLY3P[c] + NAD[c] --> DHAP[c] + NADH[c]'	Glycerol-3-phosphate dehydrogenase [ec:1.1.1.8]	R50		'GLY3P[c] + NAD[c] --> DHAP[c] + NADH[c]'	Glycerol-3-phosphate dehydrogenase [ec:1.1.1.8]	R50		'GLY3P[c] + NAD[c] --> DHAP[c] + NADH[c]'	Glycerol-3-phosphate dehydrogenase [ec:1.1.1.8]	R50		'GLY3P[c] + NAD[c] --> DHAP[c] + NADH[c]'	Glycerol-3-phosphate dehydrogenase [ec:1.1.1.8]	R50		'GLY3P[c] + NAD[c] --> DHAP[c] + NADH[c]'	Glycerol-3-phosphate dehydrogenase [ec:1.1.1.8]
R51		'DHAP[c] <--> G3P[c]'	Triose-phosphate isomerase [ec:5.3.1.1]	R51		'DHAP[c] <--> G3P[c]'	Triose-phosphate isomerase [ec:5.3.1.1]	R51		'DHAP[c] <--> G3P[c]'	Triose-phosphate isomerase [ec:5.3.1.1]	R51		'DHAP[c] <--> G3P[c]'	Triose-phosphate isomerase [ec:5.3.1.1]	R51		'DHAP[c] <--> G3P[c]'	Triose-phosphate isomerase [ec:5.3.1.1]
R52		'G3P[c] + NAD[c] + Pi[c] <--> BPG[c] + NADH[c]'	Glyceraldehyde 3-phosphate dehydrogenase [ec:1.2.1.12]	R52		'G3P[c] + NAD[c] + Pi[c] <--> BPG[c] + NADH[c]'	Glyceraldehyde 3-phosphate dehydrogenase [ec:1.2.1.12]	R52		'G3P[c] + NAD[c] + Pi[c] <--> BPG[c] + NADH[c]'	Glyceraldehyde 3-phosphate dehydrogenase [ec:1.2.1.12]	R52		'G3P[c] + NAD[c] + Pi[c] <--> BPG[c] + NADH[c]'	Glyceraldehyde 3-phosphate dehydrogenase [ec:1.2.1.12]	R52		'G3P[c] + NAD[c] + Pi[c] <--> BPG[c] + NADH[c]'	Glyceraldehyde 3-phosphate dehydrogenase [ec:1.2.1.12]
R53		'BPG[c] + ADP[c] <--> 3-PG[c] + ATP[c]'	Phosphoglycerate kinase [ec:2.7.2.3]	R53		'BPG[c] + ADP[c] <--> 3-PG[c] + ATP[c]'	Phosphoglycerate kinase [ec:2.7.2.3]	R53		'BPG[c] + ADP[c] <--> 3-PG[c] + ATP[c]'	Phosphoglycerate kinase [ec:2.7.2.3]	R53		'BPG[c] + ADP[c] <--> 3-PG[c] + ATP[c]'	Phosphoglycerate kinase [ec:2.7.2.3]	R53		'BPG[c] + ADP[c] <--> 3-PG[c] + ATP[c]'	Phosphoglycerate kinase [ec:2.7.2.3]
R54		'3-PG[c] <--> 2-PG[c]'	Phosphoglycerate mutase [ec:5.4.2.1]	R54		'3-PG[c] <--> 2-PG[c]'	Phosphoglycerate mutase [ec:5.4.2.1]	R54		'3-PG[c] <--> 2-PG[c]'	Phosphoglycerate mutase [ec:5.4.2.1]	R54		'3-PG[c] <--> 2-PG[c]'	Phosphoglycerate mutase [ec:5.4.2.1]	R54		'3-PG[c] <--> 2-PG[c]'	Phosphoglycerate mutase [ec:5.4.2.1]
R55		'2-PG[c] <--> PEP[c]'	Phosphopyruvate hydratase [ec:4.2.1.11]	R55		'2-PG[c] <--> PEP[c]'	Phosphopyruvate hydratase [ec:4.2.1.11]	R55		'2-PG[c] <--> PEP[c]'	Phosphopyruvate hydratase [ec:4.2.1.11]	R55		'2-PG[c] <--> PEP[c]'	Phosphopyruvate hydratase [ec:4.2.1.11]	R55		'2-PG[c] <--> PEP[c]'	Phosphopyruvate hydratase [ec:4.2.1.11]
R56		'PEP[c] + ADP[c] --> PYR[c] + ATP[c]'	Pyruvate kinase [ec:2.7.1.40]	R56		'PEP[c] + ADP[c] --> PYR[c] + ATP[c]'	Pyruvate kinase [ec:2.7.1.40]	R56		'PEP[c] + ADP[c] --> PYR[c] + ATP[c]'	Pyruvate kinase [ec:2.7.1.40]	R56		'PEP[c] + ADP[c] --> PYR[c] + ATP[c]'	Pyruvate kinase [ec:2.7.1.40]	R56		'PEP[c] + ADP[c] --> PYR[c] + ATP[c]'	Pyruvate kinase [ec:2.7.1.40]
R57		'PYR[c] + ATP[c] --> PEP[c] + AMP[c] + Pi[c]'	Phosphoenolpyruvate synthase [ec:2.7.9.2]	R57		'PYR[c] + ATP[c] --> PEP[c] + AMP[c] + Pi[c]'	Phosphoenolpyruvate synthase [ec:2.7.9.2]	R57		'PYR[c] + ATP[c] --> PEP[c] + AMP[c] + Pi[c]'	Phosphoenolpyruvate synthase [ec:2.7.9.2]	R57		'PYR[c] + ATP[c] --> PEP[c] + AMP[c] + Pi[c]'	Phosphoenolpyruvate synthase [ec:2.7.9.2]	R57		'PYR[c] + ATP[c] --> PEP[c] + AMP[c] + Pi[c]'	Phosphoenolpyruvate synthase [ec:2.7.9.2]
R58		'PYR[c] + NAD[c] + H-CoA[c] --> AC-CoA[c] + NADH[c] + CO2[c]'	Pyruvate dehydrogenase complex [ec:1.2.4.1&ec:2.3.1.12&ec:1.8.1.4]	R58		'PYR[c] + NAD[c] + H-CoA[c] --> AC-CoA[c] + NADH[c] + CO2[c]'	Pyruvate dehydrogenase complex [ec:1.2.4.1&ec:2.3.1.12&ec:1.8.1.4]	R58		'PYR[c] + NAD[c] + H-CoA[c] --> AC-CoA[c] + NADH[c] + CO2[c]'	Pyruvate dehydrogenase complex [ec:1.2.4.1&ec:2.3.1.12&ec:1.8.1.4]	R58		'PYR[c] + NAD[c] + H-CoA[c] --> AC-CoA[c] + NADH[c] + CO2[c]'	Pyruvate dehydrogenase complex [ec:1.2.4.1&ec:2.3.1.12&ec:1.8.1.4]	R58		'PYR[c] + NAD[c] + H-CoA[c] --> AC-CoA[c] + NADH[c] + CO2[c]'	Pyruvate dehydrogenase complex [ec:1.2.4.1&ec:2.3.1.12&ec:1.8.1.4]
R59		'PEP[c] + CO2[c] --> OXA[c] + Pi[c]'	Phosphoenolpyruvate carboxylase [ec:4.1.1.31]	R59		'PEP[c] + CO2[c] --> OXA[c] + Pi[c]'	Phosphoenolpyruvate carboxylase [ec:4.1.1.31]	R59		'PEP[c] + CO2[c] --> OXA[c] + Pi[c]'	Phosphoenolpyruvate carboxylase [ec:4.1.1.31]	R59		'PEP[c] + CO2[c] --> OXA[c] + Pi[c]'	Phosphoenolpyruvate carboxylase [ec:4.1.1.31]	R59		'PEP[c] + CO2[c] --> OXA[c] + Pi[c]'	Phosphoenolpyruvate carboxylase [ec:4.1.1.31]
R60		'PYR[c] + ATP[c] + CO2[c] <--> OXA[c] + ADP[c] + Pi[c]'	Pyruvate carboxylase [ec:6.4.1.1]	R60		'PYR[c] + ATP[c] + CO2[c] <--> OXA[c] + ADP[c] + Pi[c]'	Pyruvate carboxylase [ec:6.4.1.1]	R60		'PYR[c] + ATP[c] + CO2[c] <--> OXA[c] + ADP[c] + Pi[c]'	Pyruvate carboxylase [ec:6.4.1.1]	R60		'PYR[c] + ATP[c] + CO2[c] <--> OXA[c] + ADP[c] + Pi[c]'	Pyruvate carboxylase [ec:6.4.1.1]	R60		'PYR[c] + ATP[c] + CO2[c] <--> OXA[c] + ADP[c] + Pi[c]'	Pyruvate carboxylase [ec:6.4.1.1]
R61		'OXA[c] + ATP[c] --> PEP[c] + ADP[c] + CO2[c]'	Phosphoenolpyruvate carboxykinase [ec:4.1.1.49]	R61		'OXA[c] + ATP[c] --> PEP[c] + ADP[c] + CO2[c]'	Phosphoenolpyruvate carboxykinase [ec:4.1.1.49]	R61		'OXA[c] + ATP[c] --> PEP[c] + ADP[c] + CO2[c]'	Phosphoenolpyruvate carboxykinase [ec:4.1.1.49]	R61		'OXA[c] + ATP[c] --> PEP[c] + ADP[c] + CO2[c]'	Phosphoenolpyruvate carboxykinase [ec:4.1.1.49]	R61		'OXA[c] + ATP[c] --> PEP[c] + ADP[c] + CO2[c]'	Phosphoenolpyruvate carboxykinase [ec:4.1.1.49]
R62		'OXA[c] + AC-CoA[c] --> CIT[c] + H-CoA[c]'	Citrate synthase [ec:2.3.3.1]	R62		'OXA[c] + AC-CoA[c] --> CIT[c] + H-CoA[c]'	Citrate synthase [ec:2.3.3.1]	R62		'OXA[c] + AC-CoA[c] --> CIT[c] + H-CoA[c]'	Citrate synthase [ec:2.3.3.1]	R62		'OXA[c] + AC-CoA[c] --> CIT[c] + H-CoA[c]'	Citrate synthase [ec:2.3.3.1]	R62		'OXA[c] + AC-CoA[c] --> CIT[c] + H-CoA[c]'	Citrate synthase [ec:2.3.3.1]
R63		'CIT[c] <--> ISC[c]'	Aconitase [ec:4.2.1.3]	R63		'CIT[c] <--> ISC[c]'	Aconitase [ec:4.2.1.3]	R63		'CIT[c] <--> ISC[c]'	Aconitase [ec:4.2.1.3]	R63		'CIT[c] <--> ISC[c]'	Aconitase [ec:4.2.1.3]	R63		'CIT[c] <--> ISC[c]'	Aconitase [ec:4.2.1.3]
R64		'ISC[c] + NAD[c] --> aKG[c] + NADH[c] + CO2[c]'	Isocitrate dehydrogenase (NAD dependent) [ec:1.1.1.41]	R64		'ISC[c] + NAD[c] --> aKG[c] + NADH[c] + CO2[c]'	Isocitrate dehydrogenase (NAD dependent) [ec:1.1.1.41]	R64		'ISC[c] + NAD[c] --> aKG[c] + NADH[c] + CO2[c]'	Isocitrate dehydrogenase (NAD dependent) [ec:1.1.1.41]	R64		'ISC[c] + NAD[c] --> aKG[c] + NADH[c] + CO2[c]'	Isocitrate dehydrogenase (NAD dependent) [ec:1.1.1.41]	R64		'ISC[c] + NAD[c] --> aKG[c] + NADH[c] + CO2[c]'	Isocitrate dehydrogenase (NAD dependent) [ec:1.1.1.41]
R65		'aKG[c] + H-CoA[c] + NAD[c] --> SUC-CoA[c] + CO2[c] + NADH[c]'	α-ketoglutarate dehydrogenase [ec:1.2.4.2&2.3.1.61]	R65		'aKG[c] + H-CoA[c] + NAD[c] --> SUC-CoA[c] + CO2[c] + NADH[c]'	α-ketoglutarate dehydrogenase [ec:1.2.4.2&2.3.1.61]	R65		'aKG[c] + H-CoA[c] + NAD[c] --> SUC-CoA[c] + CO2[c] + NADH[c]'	α-ketoglutarate dehydrogenase [ec:1.2.4.2&2.3.1.61]	R65		'aKG[c] + H-CoA[c] + NAD[c] --> SUC-CoA[c] + CO2[c] + NADH[c]'	α-ketoglutarate dehydrogenase [ec:1.2.4.2&2.3.1.61]	R65		'aKG[c] + H-CoA[c] + NAD[c] --> SUC-CoA[c] + CO2[c] + NADH[c]'	α-ketoglutarate dehydrogenase [ec:1.2.4.2&2.3.1.61]
R66		'SUC-CoA[c] + ADP[c] + Pi[c] <--> SUC[c] + H-CoA[c] + ATP[c]'	Succinyl-CoA synthetase [ec:6.2.1.5]	R66		'SUC-CoA[c] + ADP[c] + Pi[c] <--> SUC[c] + H-CoA[c] + ATP[c]'	Succinyl-CoA synthetase [ec:6.2.1.5]	R66		'SUC-CoA[c] + ADP[c] + Pi[c] <--> SUC[c] + H-CoA[c] + ATP[c]'	Succinyl-CoA synthetase [ec:6.2.1.5]	R66		'SUC-CoA[c] + ADP[c] + Pi[c] <--> SUC[c] + H-CoA[c] + ATP[c]'	Succinyl-CoA synthetase [ec:6.2.1.5]	R66		'SUC-CoA[c] + ADP[c] + Pi[c] <--> SUC[c] + H-CoA[c] + ATP[c]'	Succinyl-CoA synthetase [ec:6.2.1.5]
R67		'SUC[c] + FAD[c] <--> FUM[c] + FADH2[c]'	Fumarate reductase [ec:1.3.5.4]	R67		'SUC[c] + FAD[c] <--> FUM[c] + FADH2[c]'	Fumarate reductase [ec:1.3.5.4]	R67		'SUC[c] + FAD[c] <--> FUM[c] + FADH2[c]'	Fumarate reductase [ec:1.3.5.4]	R67		'SUC[c] + FAD[c] <--> FUM[c] + FADH2[c]'	Fumarate reductase [ec:1.3.5.4]	R67		'SUC[c] + FAD[c] <--> FUM[c] + FADH2[c]'	Fumarate reductase [ec:1.3.5.4]
R68		'SUC[c] + UQ[c] --> FUM[c] + UQH2[c]'	Succinate dehydrogenase [ec:1.3.5.1]	R68		'SUC[c] + UQ[c] --> FUM[c] + UQH2[c]'	Succinate dehydrogenase [ec:1.3.5.1]	R68		'SUC[c] + UQ[c] --> FUM[c] + UQH2[c]'	Succinate dehydrogenase [ec:1.3.5.1]	R68		'SUC[c] + UQ[c] --> FUM[c] + UQH2[c]'	Succinate dehydrogenase [ec:1.3.5.1]	R68		'SUC[c] + UQ[c] --> FUM[c] + UQH2[c]'	Succinate dehydrogenase [ec:1.3.5.1]
R69		'FUM[c] <--> MAL[c]'	Fumarase [ec:4.2.1.2]	R69		'FUM[c] <--> MAL[c]'	Fumarase [ec:4.2.1.2]	R69		'FUM[c] <--> MAL[c]'	Fumarase [ec:4.2.1.2]	R69		'FUM[c] <--> MAL[c]'	Fumarase [ec:4.2.1.2]	R69		'FUM[c] <--> MAL[c]'	Fumarase [ec:4.2.1.2]
R70		'MAL[c] + NAD[c] <--> OXA[c] + NADH[c]'	Malate dehydrogenase [ec:1.1.1.37]	R70		'MAL[c] + NAD[c] <--> OXA[c] + NADH[c]'	Malate dehydrogenase [ec:1.1.1.37]	R70		'MAL[c] + NAD[c] <--> OXA[c] + NADH[c]'	Malate dehydrogenase [ec:1.1.1.37]	R70		'MAL[c] + NAD[c] <--> OXA[c] + NADH[c]'	Malate dehydrogenase [ec:1.1.1.37]	R70		'MAL[c] + NAD[c] <--> OXA[c] + NADH[c]'	Malate dehydrogenase [ec:1.1.1.37]
R71		'MAL[c] + NADP[c] --> PYR[c] + CO2[c] + NADPH[c]'	Malic enzyme (NADP dependent) [ec:1.1.1.40]	R71		'MAL[c] + NADP[c] --> PYR[c] + CO2[c] + NADPH[c]'	Malic enzyme (NADP dependent) [ec:1.1.1.40]	R71		'MAL[c] + NADP[c] --> PYR[c] + CO2[c] + NADPH[c]'	Malic enzyme (NADP dependent) [ec:1.1.1.40]	R71		'MAL[c] + NADP[c] --> PYR[c] + CO2[c] + NADPH[c]'	Malic enzyme (NADP dependent) [ec:1.1.1.40]	R71		'MAL[c] + NADP[c] --> PYR[c] + CO2[c] + NADPH[c]'	Malic enzyme (NADP dependent) [ec:1.1.1.40]
R72		'ISC[c] --> GLYOX[c] + SUC[c]'	Isocitrate lyase [ec:4.1.3.1]	R72		'ISC[c] --> GLYOX[c] + SUC[c]'	Isocitrate lyase [ec:4.1.3.1]	R72		'ISC[c] --> GLYOX[c] + SUC[c]'	Isocitrate lyase [ec:4.1.3.1]	R72		'ISC[c] --> GLYOX[c] + SUC[c]'	Isocitrate lyase [ec:4.1.3.1]	R72		'ISC[c] --> GLYOX[c] + SUC[c]'	Isocitrate lyase [ec:4.1.3.1]
R73		'GLYOX[c] + AC-CoA[c] --> MAL[c] + H-CoA[c]'	Malate synthase [ec:2.3.3.9]	R73		'GLYOX[c] + AC-CoA[c] --> MAL[c] + H-CoA[c]'	Malate synthase [ec:2.3.3.9]	R73		'GLYOX[c] + AC-CoA[c] --> MAL[c] + H-CoA[c]'	Malate synthase [ec:2.3.3.9]	R73		'GLYOX[c] + AC-CoA[c] --> MAL[c] + H-CoA[c]'	Malate synthase [ec:2.3.3.9]	R73		'GLYOX[c] + AC-CoA[c] --> MAL[c] + H-CoA[c]'	Malate synthase [ec:2.3.3.9]
R74		'AC[c] + H-CoA[c] + ATP[c] --> AC-CoA[c] + AMP[c] + 2 Pi[c]'	Acetyl-CoA synthetase [ec:6.2.1.1]	R74		'AC[c] + H-CoA[c] + ATP[c] --> AC-CoA[c] + AMP[c] + 2 Pi[c]'	Acetyl-CoA synthetase [ec:6.2.1.1]	R74		'AC[c] + H-CoA[c] + ATP[c] --> AC-CoA[c] + AMP[c] + 2 Pi[c]'	Acetyl-CoA synthetase [ec:6.2.1.1]	R74		'AC[c] + H-CoA[c] + ATP[c] --> AC-CoA[c] + AMP[c] + 2 Pi[c]'	Acetyl-CoA synthetase [ec:6.2.1.1]	R74		'AC[c] + H-CoA[c] + ATP[c] --> AC-CoA[c] + AMP[c] + 2 Pi[c]'	Acetyl-CoA synthetase [ec:6.2.1.1]
R75		'2 AC-CoA[c] <--> ACAC-CoA[c] + H-CoA[c]'	Acetoacetyl-CoA thiolase [ec:2.3.1.9]	R75		'2 AC-CoA[c] <--> ACAC-CoA[c] + H-CoA[c]'	Acetoacetyl-CoA thiolase [ec:2.3.1.9]	R75		'2 AC-CoA[c] <--> ACAC-CoA[c] + H-CoA[c]'	Acetoacetyl-CoA thiolase [ec:2.3.1.9]	R75		'2 AC-CoA[c] <--> ACAC-CoA[c] + H-CoA[c]'	Acetoacetyl-CoA thiolase [ec:2.3.1.9]	R75		'2 AC-CoA[c] <--> ACAC-CoA[c] + H-CoA[c]'	Acetoacetyl-CoA thiolase [ec:2.3.1.9]
R76		'AC-CoA[c] + SUC[c] --> AC[c] + SUC-CoA[c]'	Succinyl-CoA:acetate CoA-transferase [ec:2.8.3.18]	R76		'AC-CoA[c] + SUC[c] --> AC[c] + SUC-CoA[c]'	Succinyl-CoA:acetate CoA-transferase [ec:2.8.3.18]	R76		'AC-CoA[c] + SUC[c] --> AC[c] + SUC-CoA[c]'	Succinyl-CoA:acetate CoA-transferase [ec:2.8.3.18]	R76		'AC-CoA[c] + SUC[c] --> AC[c] + SUC-CoA[c]'	Succinyl-CoA:acetate CoA-transferase [ec:2.8.3.18]	R76		'AC-CoA[c] + SUC[c] --> AC[c] + SUC-CoA[c]'	Succinyl-CoA:acetate CoA-transferase [ec:2.8.3.18]
R77		'ACAC[c] + SUC-CoA[c] <--> ACAC-CoA[c] + SUC[c]'	3-Oxoacid CoA-transferase [ec:2.8.3.5]	R77		'ACAC[c] + SUC-CoA[c] <--> ACAC-CoA[c] + SUC[c]'	3-Oxoacid CoA-transferase [ec:2.8.3.5]	R77		'ACAC[c] + SUC-CoA[c] <--> ACAC-CoA[c] + SUC[c]'	3-Oxoacid CoA-transferase [ec:2.8.3.5]	R77		'ACAC[c] + SUC-CoA[c] <--> ACAC-CoA[c] + SUC[c]'	3-Oxoacid CoA-transferase [ec:2.8.3.5]	R77		'ACAC[c] + SUC-CoA[c] <--> ACAC-CoA[c] + SUC[c]'	3-Oxoacid CoA-transferase [ec:2.8.3.5]
R78		'PYR[c] + H-CoA[c] --> AC-CoA[c] + FOR[c]'	Pyruvate formate lyase [ec:2.3.1.54]	R78		'PYR[c] + H-CoA[c] --> AC-CoA[c] + FOR[c]'	Pyruvate formate lyase [ec:2.3.1.54]	R78		'PYR[c] + H-CoA[c] --> AC-CoA[c] + FOR[c]'	Pyruvate formate lyase [ec:2.3.1.54]	R78		'PYR[c] + H-CoA[c] --> AC-CoA[c] + FOR[c]'	Pyruvate formate lyase [ec:2.3.1.54]	R78		'PYR[c] + H-CoA[c] --> AC-CoA[c] + FOR[c]'	Pyruvate formate lyase [ec:2.3.1.54]
R79		'FOR[c] + NAD[c] --> CO2[c] + NADH[c]'	Formate dehydrogenase [ec:1.17.1.9]	R79		'FOR[c] + NAD[c] --> CO2[c] + NADH[c]'	Formate dehydrogenase [ec:1.17.1.9]	R79		'FOR[c] + NAD[c] --> CO2[c] + NADH[c]'	Formate dehydrogenase [ec:1.17.1.9]	R79		'FOR[c] + NAD[c] --> CO2[c] + NADH[c]'	Formate dehydrogenase [ec:1.17.1.9]	R79		'FOR[c] + NAD[c] --> CO2[c] + NADH[c]'	Formate dehydrogenase [ec:1.17.1.9]
R80		'H-CoA[c] + ACP[c] --> AC-CoA[c] + Pi[c]'	Phosphate acetyltransferase [ec:2.3.1.8]	R80		'H-CoA[c] + ACP[c] --> AC-CoA[c] + Pi[c]'	Phosphate acetyltransferase [ec:2.3.1.8]	R80		'H-CoA[c] + ACP[c] --> AC-CoA[c] + Pi[c]'	Phosphate acetyltransferase [ec:2.3.1.8]	R80		'H-CoA[c] + ACP[c] --> AC-CoA[c] + Pi[c]'	Phosphate acetyltransferase [ec:2.3.1.8]	R80		'H-CoA[c] + ACP[c] --> AC-CoA[c] + Pi[c]'	Phosphate acetyltransferase [ec:2.3.1.8]
R81		'ACP[c] + ADP[c] --> AC[c] + ATP[c]'	Acetate kinase [ec:2.7.2.1]	R81		'ACP[c] + ADP[c] --> AC[c] + ATP[c]'	Acetate kinase [ec:2.7.2.1]	R81		'ACP[c] + ADP[c] --> AC[c] + ATP[c]'	Acetate kinase [ec:2.7.2.1]	R81		'ACP[c] + ADP[c] --> AC[c] + ATP[c]'	Acetate kinase [ec:2.7.2.1]	R81		'ACP[c] + ADP[c] --> AC[c] + ATP[c]'	Acetate kinase [ec:2.7.2.1]
R82		'AC-CoA[c] + NADH[c] <--> ACA[c] + NAD[c] + H-CoA[c]'	Acetaldehyde dehydrogenase [ec:1.2.1.10]	R82		'AC-CoA[c] + NADH[c] <--> ACA[c] + NAD[c] + H-CoA[c]'	Acetaldehyde dehydrogenase [ec:1.2.1.10]	R82		'AC-CoA[c] + NADH[c] <--> ACA[c] + NAD[c] + H-CoA[c]'	Acetaldehyde dehydrogenase [ec:1.2.1.10]	R82		'AC-CoA[c] + NADH[c] <--> ACA[c] + NAD[c] + H-CoA[c]'	Acetaldehyde dehydrogenase [ec:1.2.1.10]	R82		'AC-CoA[c] + NADH[c] <--> ACA[c] + NAD[c] + H-CoA[c]'	Acetaldehyde dehydrogenase [ec:1.2.1.10]
R83		'ACA[c] + NAD[c] --> AC[c] + NADH[c]'	Aldehyde dehydrogenase (NAD dependent) [ec:1.2.1.3]	R83		'ACA[c] + NAD[c] --> AC[c] + NADH[c]'	Aldehyde dehydrogenase (NAD dependent) [ec:1.2.1.3]	R83		'ACA[c] + NAD[c] --> AC[c] + NADH[c]'	Aldehyde dehydrogenase (NAD dependent) [ec:1.2.1.3]	R83		'ACA[c] + NAD[c] --> AC[c] + NADH[c]'	Aldehyde dehydrogenase (NAD dependent) [ec:1.2.1.3]	R83		'ACA[c] + NAD[c] --> AC[c] + NADH[c]'	Aldehyde dehydrogenase (NAD dependent) [ec:1.2.1.3]
R84		'ACA[c] + NADH[c] --> ETOH[c] + NAD[c]'	Alcohol dehydrogenase [ec:1.1.1.1]	R84		'ACA[c] + NADH[c] --> ETOH[c] + NAD[c]'	Alcohol dehydrogenase [ec:1.1.1.1]	R84		'ACA[c] + NADH[c] --> ETOH[c] + NAD[c]'	Alcohol dehydrogenase [ec:1.1.1.1]	R84		'ACA[c] + NADH[c] --> ETOH[c] + NAD[c]'	Alcohol dehydrogenase [ec:1.1.1.1]	R84		'ACA[c] + NADH[c] --> ETOH[c] + NAD[c]'	Alcohol dehydrogenase [ec:1.1.1.1]
R85		'PYR[c] + NADH[c] --> LAC[c] + NAD[c]'	Lactate dehydrogenase [ec:1.1.1.27]	R85		'PYR[c] + NADH[c] --> LAC[c] + NAD[c]'	Lactate dehydrogenase [ec:1.1.1.27]	R85		'PYR[c] + NADH[c] --> LAC[c] + NAD[c]'	Lactate dehydrogenase [ec:1.1.1.27]	R85		'PYR[c] + NADH[c] --> LAC[c] + NAD[c]'	Lactate dehydrogenase [ec:1.1.1.27]	R85		'PYR[c] + NADH[c] --> LAC[c] + NAD[c]'	Lactate dehydrogenase [ec:1.1.1.27]
R86		'ACAC[c] --> ACETONE[c] + CO2[c]'	Acetoacetate decarboxylase [ec:4.1.1.4]	R86		'ACAC[c] --> ACETONE[c] + CO2[c]'	Acetoacetate decarboxylase [ec:4.1.1.4]	R86		'ACAC[c] --> ACETONE[c] + CO2[c]'	Acetoacetate decarboxylase [ec:4.1.1.4]	R86		'ACAC[c] --> ACETONE[c] + CO2[c]'	Acetoacetate decarboxylase [ec:4.1.1.4]	R86		'ACAC[c] --> ACETONE[c] + CO2[c]'	Acetoacetate decarboxylase [ec:4.1.1.4]
R87		'ACAC-CoA[c] + NADPH[c] <--> 3-HBut-CoA[c] + NADP[c]'	3-Hydroxyacyl-CoA dehydrogenase [ec:1.1.1.35]	R87		'ACAC-CoA[c] + NADPH[c] <--> 3-HBut-CoA[c] + NADP[c]'	3-Hydroxyacyl-CoA dehydrogenase [ec:1.1.1.35]	R87		'ACAC-CoA[c] + NADPH[c] <--> 3-HBut-CoA[c] + NADP[c]'	3-Hydroxyacyl-CoA dehydrogenase [ec:1.1.1.35]	R87		'ACAC-CoA[c] + NADPH[c] <--> 3-HBut-CoA[c] + NADP[c]'	3-Hydroxyacyl-CoA dehydrogenase [ec:1.1.1.35]	R87		'ACAC-CoA[c] + NADPH[c] <--> 3-HBut-CoA[c] + NADP[c]'	3-Hydroxyacyl-CoA dehydrogenase [ec:1.1.1.35]
R88		'3-HBut-CoA[c] --> PHB[c] + H-CoA[c]'	Poly(3-hydroxybutyrate) synthase [ec:2.3.1.-]	R88		'3-HBut-CoA[c] --> PHB[c] + H-CoA[c]'	Poly(3-hydroxybutyrate) synthase [ec:2.3.1.-]	R88		'3-HBut-CoA[c] --> PHB[c] + H-CoA[c]'	Poly(3-hydroxybutyrate) synthase [ec:2.3.1.-]	R88		'3-HBut-CoA[c] --> PHB[c] + H-CoA[c]'	Poly(3-hydroxybutyrate) synthase [ec:2.3.1.-]	R88		'3-HBut-CoA[c] --> PHB[c] + H-CoA[c]'	Poly(3-hydroxybutyrate) synthase [ec:2.3.1.-]
R89		'PHB[c] + NAD[c] --> ACAC[c] + NADH[c]'	PHA depolymerase [ec:3.1.1.75]	R89		'PHB[c] + NAD[c] --> ACAC[c] + NADH[c]'	PHA depolymerase [ec:3.1.1.75]	R89		'PHB[c] + NAD[c] --> ACAC[c] + NADH[c]'	PHA depolymerase [ec:3.1.1.75]	R89		'PHB[c] + NAD[c] --> ACAC[c] + NADH[c]'	PHA depolymerase [ec:3.1.1.75]	R89		'PHB[c] + NAD[c] --> ACAC[c] + NADH[c]'	PHA depolymerase [ec:3.1.1.75]
R90		'aKG[c] + NADPH[c] + NH3[c] <--> GLU[c] + NADP[c]'	Glutamate dehydrogenase [ec:1.4.1.2]	R90		'aKG[c] + NADPH[c] + NH3[c] <--> GLU[c] + NADP[c]'	Glutamate dehydrogenase [ec:1.4.1.2]	R90		'aKG[c] + NADPH[c] + NH3[c] <--> GLU[c] + NADP[c]'	Glutamate dehydrogenase [ec:1.4.1.2]	R90		'aKG[c] + NADPH[c] + NH3[c] <--> GLU[c] + NADP[c]'	Glutamate dehydrogenase [ec:1.4.1.2]	R90		'aKG[c] + NADPH[c] + NH3[c] <--> GLU[c] + NADP[c]'	Glutamate dehydrogenase [ec:1.4.1.2]
R91		'GLU[c] + NH3[c] + ATP[c] <--> GLN[c] + ADP[c] + Pi[c]'	Glutamine synthase [ec:6.3.1.2]	R91		'GLU[c] + NH3[c] + ATP[c] <--> GLN[c] + ADP[c] + Pi[c]'	Glutamine synthase [ec:6.3.1.2]	R91		'GLU[c] + NH3[c] + ATP[c] <--> GLN[c] + ADP[c] + Pi[c]'	Glutamine synthase [ec:6.3.1.2]	R91		'GLU[c] + NH3[c] + ATP[c] <--> GLN[c] + ADP[c] + Pi[c]'	Glutamine synthase [ec:6.3.1.2]	R91		'GLU[c] + NH3[c] + ATP[c] <--> GLN[c] + ADP[c] + Pi[c]'	Glutamine synthase [ec:6.3.1.2]
R92		'0.021 G6P[c] + 0.007 F6P[c] + 0.09 R5P[c] + 0.036 E4P[c] + 0.013 G3P[c] + 0.15 3-PG[c] + 0.052 PEP[c] + 0.283 PYR[c] + 0.374 AC-CoA[c] + 0.179 OXA[c] + 0.832 GLU[c] + 0.025 GLN[c] + 4.11 ATP[c] + 0.826 NADPH[c] + 0.312 NAD[c] --> BIOMASS[c] + 0.751 aKG[c] + 0.261 CO2[c] + 0.374 H-CoA[c] + 4.11 ADP[c] + 4.479 Pi[c] + 0.826 NADP[c] + 0.312 NADH[c]'	Biomass formation	R92		'0.021 G6P[c] + 0.007 F6P[c] + 0.09 R5P[c] + 0.036 E4P[c] + 0.013 G3P[c] + 0.15 3-PG[c] + 0.052 PEP[c] + 0.283 PYR[c] + 0.374 AC-CoA[c] + 0.179 OXA[c] + 0.832 GLU[c] + 0.025 GLN[c] + 4.11 ATP[c] + 0.826 NADPH[c] + 0.312 NAD[c] --> BIOMASS[c] + 0.751 aKG[c] + 0.261 CO2[c] + 0.374 H-CoA[c] + 4.11 ADP[c] + 4.479 Pi[c] + 0.826 NADP[c] + 0.312 NADH[c]'	Biomass formation	R92		'0.021 G6P[c] + 0.007 F6P[c] + 0.09 R5P[c] + 0.036 E4P[c] + 0.013 G3P[c] + 0.15 3-PG[c] + 0.052 PEP[c] + 0.283 PYR[c] + 0.374 AC-CoA[c] + 0.179 OXA[c] + 0.832 GLU[c] + 0.025 GLN[c] + 4.11 ATP[c] + 0.826 NADPH[c] + 0.312 NAD[c] --> BIOMASS[c] + 0.751 aKG[c] + 0.261 CO2[c] + 0.374 H-CoA[c] + 4.11 ADP[c] + 4.479 Pi[c] + 0.826 NADP[c] + 0.312 NADH[c]'	Biomass formation	R92		'0.021 G6P[c] + 0.007 F6P[c] + 0.09 R5P[c] + 0.036 E4P[c] + 0.013 G3P[c] + 0.15 3-PG[c] + 0.052 PEP[c] + 0.283 PYR[c] + 0.374 AC-CoA[c] + 0.179 OXA[c] + 0.832 GLU[c] + 0.025 GLN[c] + 4.11 ATP[c] + 0.826 NADPH[c] + 0.312 NAD[c] --> BIOMASS[c] + 0.751 aKG[c] + 0.261 CO2[c] + 0.374 H-CoA[c] + 4.11 ADP[c] + 4.479 Pi[c] + 0.826 NADP[c] + 0.312 NADH[c]'	Biomass formation	R92		'0.021 G6P[c] + 0.007 F6P[c] + 0.09 R5P[c] + 0.036 E4P[c] + 0.013 G3P[c] + 0.15 3-PG[c] + 0.052 PEP[c] + 0.283 PYR[c] + 0.374 AC-CoA[c] + 0.179 OXA[c] + 0.832 GLU[c] + 0.025 GLN[c] + 4.11 ATP[c] + 0.826 NADPH[c] + 0.312 NAD[c] --> BIOMASS[c] + 0.751 aKG[c] + 0.261 CO2[c] + 0.374 H-CoA[c] + 4.11 ADP[c] + 4.479 Pi[c] + 0.826 NADP[c] + 0.312 NADH[c]'	Biomass formation
R93		'NADH[c] + FAD[c] --> NAD[c] + FADH2[c]'	Flavin reductase (NAD dependent) [ec:1.5.1.36]	R93		'NADH[c] + FAD[c] --> NAD[c] + FADH2[c]'	Flavin reductase (NAD dependent) [ec:1.5.1.36]	R93		'NADH[c] + FAD[c] --> NAD[c] + FADH2[c]'	Flavin reductase (NAD dependent) [ec:1.5.1.36]	R93		'NADH[c] + FAD[c] --> NAD[c] + FADH2[c]'	Flavin reductase (NAD dependent) [ec:1.5.1.36]	R93		'NADH[c] + FAD[c] --> NAD[c] + FADH2[c]'	Flavin reductase (NAD dependent) [ec:1.5.1.36]
R94		'NADPH[c] + NAD[c] --> NADP[c] + NADH[c]'	NAD(P) transhydrogenase [ec:1.6.1.3]	R94		'NADPH[c] + NAD[c] --> NADP[c] + NADH[c]'	NAD(P) transhydrogenase [ec:1.6.1.3]	R94		'NADPH[c] + NAD[c] --> NADP[c] + NADH[c]'	NAD(P) transhydrogenase [ec:1.6.1.3]	R94		'NADPH[c] + NAD[c] --> NADP[c] + NADH[c]'	NAD(P) transhydrogenase [ec:1.6.1.3]	R94		'NADPH[c] + NAD[c] --> NADP[c] + NADH[c]'	NAD(P) transhydrogenase [ec:1.6.1.3]
R95		'NADH[c] + NADP[c] + H[e] --> NAD[c] + NADPH[c] + H[c]'	NAD(P) transhydrogenase (Re/Si-specific) [ec:1.6.1.2]	R95		'NADH[c] + NADP[c] + H[e] --> NAD[c] + NADPH[c] + H[c]'	NAD(P) transhydrogenase (Re/Si-specific) [ec:1.6.1.2]	R95		'NADH[c] + NADP[c] + H[e] --> NAD[c] + NADPH[c] + H[c]'	NAD(P) transhydrogenase (Re/Si-specific) [ec:1.6.1.2]	R95		'NADH[c] + NADP[c] + H[e] --> NAD[c] + NADPH[c] + H[c]'	NAD(P) transhydrogenase (Re/Si-specific) [ec:1.6.1.2]	R95		'NADH[c] + NADP[c] + H[e] --> NAD[c] + NADPH[c] + H[c]'	NAD(P) transhydrogenase (Re/Si-specific) [ec:1.6.1.2]
R96		'H2[c] + NAD[c] --> NADH[c]'	Hydrogen dehydrogenase [ec:1.12.1.2]	R96		'H2[c] + NAD[c] --> NADH[c]'	Hydrogen dehydrogenase [ec:1.12.1.2]	R96		'H2[c] + NAD[c] --> NADH[c]'	Hydrogen dehydrogenase [ec:1.12.1.2]	R96		'H2[c] + NAD[c] --> NADH[c]'	Hydrogen dehydrogenase [ec:1.12.1.2]	R96		'H2[c] + NAD[c] --> NADH[c]'	Hydrogen dehydrogenase [ec:1.12.1.2]
R97		'UQ[c] + H2[c] --> UQH2[c]'	Hydrogen dehydrogenase [ec:1.12.99.6]	R97		'UQ[c] + H2[c] --> UQH2[c]'	Hydrogen dehydrogenase [ec:1.12.99.6]	R97		'UQ[c] + H2[c] --> UQH2[c]'	Hydrogen dehydrogenase [ec:1.12.99.6]	R97		'UQ[c] + H2[c] --> UQH2[c]'	Hydrogen dehydrogenase [ec:1.12.99.6]	R97		'UQ[c] + H2[c] --> UQH2[c]'	Hydrogen dehydrogenase [ec:1.12.99.6]
R98		'NADH[c] + UQ[c] --> NAD[c] + UQH2[c]'	NADH-quinone oxidoreductase [ec:1.6.5.9]	R98		'NADH[c] + UQ[c] --> NAD[c] + UQH2[c]'	NADH-quinone oxidoreductase [ec:1.6.5.9]	R98		'NADH[c] + UQ[c] --> NAD[c] + UQH2[c]'	NADH-quinone oxidoreductase [ec:1.6.5.9]	R98		'NADH[c] + UQ[c] --> NAD[c] + UQH2[c]'	NADH-quinone oxidoreductase [ec:1.6.5.9]	R98		'NADH[c] + UQ[c] --> NAD[c] + UQH2[c]'	NADH-quinone oxidoreductase [ec:1.6.5.9]
R99		'NADH[c] + UQ[c] + 4 H[c] --> NAD[c] + UQH2[c] + 4 H[e]'	NADH-quinone oxidoreductase [ec:7.1.1.2]	R99		'NADH[c] + UQ[c] + 4 H[c] --> NAD[c] + UQH2[c] + 4 H[e]'	NADH-quinone oxidoreductase [ec:7.1.1.2]	R99		'NADH[c] + UQ[c] + 4 H[c] --> NAD[c] + UQH2[c] + 4 H[e]'	NADH-quinone oxidoreductase [ec:7.1.1.2]	R99		'NADH[c] + UQ[c] + 4 H[c] --> NAD[c] + UQH2[c] + 4 H[e]'	NADH-quinone oxidoreductase [ec:7.1.1.2]	R99		'NADH[c] + UQ[c] + 4 H[c] --> NAD[c] + UQH2[c] + 4 H[e]'	NADH-quinone oxidoreductase [ec:7.1.1.2]
R100		'UQH2[c] + 4 H[c] + 0.5 O2[c] --> UQ[c] + 4 H[e]'	Cytochrome bd oxidase [ec:7.1.1.7]	R100		'UQH2[c] + 4 H[c] + 0.5 O2[c] --> UQ[c] + 4 H[e]'	Cytochrome bd oxidase [ec:7.1.1.7]	R100		'UQH2[c] + 4 H[c] + 0.5 O2[c] --> UQ[c] + 4 H[e]'	Cytochrome bd oxidase [ec:7.1.1.7]	R100		'UQH2[c] + 4 H[c] + 0.5 O2[c] --> UQ[c] + 4 H[e]'	Cytochrome bd oxidase [ec:7.1.1.7]	R100		'UQH2[c] + 4 H[c] + 0.5 O2[c] --> UQ[c] + 4 H[e]'	Cytochrome bd oxidase [ec:7.1.1.7]
R101		'UQH2[c] + 2 H[c] + 0.5 O2[c] --> UQ[c] + 2 H[e]'	Cytochrome bo oxidase [ec:7.1.1.3]	R101		'UQH2[c] + 2 H[c] + 0.5 O2[c] --> UQ[c] + 2 H[e]'	Cytochrome bo oxidase [ec:7.1.1.3]	R101		'UQH2[c] + 2 H[c] + 0.5 O2[c] --> UQ[c] + 2 H[e]'	Cytochrome bo oxidase [ec:7.1.1.3]	R101		'UQH2[c] + 2 H[c] + 0.5 O2[c] --> UQ[c] + 2 H[e]'	Cytochrome bo oxidase [ec:7.1.1.3]	R101		'UQH2[c] + 2 H[c] + 0.5 O2[c] --> UQ[c] + 2 H[e]'	Cytochrome bo oxidase [ec:7.1.1.3]
R102		'ADP[c] + 4 H[e] + Pi[c] --> ATP[c] + 4 H[c]'	ATP synthase [ec:3.6.3.14]	R102		'ADP[c] + 4 H[e] + Pi[c] --> ATP[c] + 4 H[c]'	ATP synthase [ec:3.6.3.14]	R102		'ADP[c] + 4 H[e] + Pi[c] --> ATP[c] + 4 H[c]'	ATP synthase [ec:3.6.3.14]	R102		'ADP[c] + 4 H[e] + Pi[c] --> ATP[c] + 4 H[c]'	ATP synthase [ec:3.6.3.14]	R102		'ADP[c] + 4 H[e] + Pi[c] --> ATP[c] + 4 H[c]'	ATP synthase [ec:3.6.3.14]
R103		'ADP[c] + 3 H[e] + Pi[c] <-- ATP[c] + 3 H[c]'	reverse ATP synthase (proton pump) [ec:3.6.3.14]	R103		'ADP[c] + 3 H[e] + Pi[c] <-- ATP[c] + 3 H[c]'	reverse ATP synthase (proton pump) [ec:3.6.3.14]	R103		'ADP[c] + 3 H[e] + Pi[c] <-- ATP[c] + 3 H[c]'	reverse ATP synthase (proton pump) [ec:3.6.3.14]	R103		'ADP[c] + 3 H[e] + Pi[c] <-- ATP[c] + 3 H[c]'	reverse ATP synthase (proton pump) [ec:3.6.3.14]	R103		'ADP[c] + 3 H[e] + Pi[c] <-- ATP[c] + 3 H[c]'	reverse ATP synthase (proton pump) [ec:3.6.3.14]
R104		'AMP[c] + ATP[c] --> 2 ADP[c]'	Adenylate kinase [ec:2.7.4.3]	R104		'AMP[c] + ATP[c] --> 2 ADP[c]'	Adenylate kinase [ec:2.7.4.3]	R104		'AMP[c] + ATP[c] --> 2 ADP[c]'	Adenylate kinase [ec:2.7.4.3]	R104		'AMP[c] + ATP[c] --> 2 ADP[c]'	Adenylate kinase [ec:2.7.4.3]	R104		'AMP[c] + ATP[c] --> 2 ADP[c]'	Adenylate kinase [ec:2.7.4.3]
R105		'GLU[c] + OXA[c] --> aKG[c] + ASP[c]'	Aspartate aminotransferase [ec:2.6.1.1]	R105		'GLU[c] + OXA[c] --> aKG[c] + ASP[c]'	Aspartate aminotransferase [ec:2.6.1.1]	R105		'GLU[c] + OXA[c] --> aKG[c] + ASP[c]'	Aspartate aminotransferase [ec:2.6.1.1]	R105		'GLU[c] + OXA[c] --> aKG[c] + ASP[c]'	Aspartate aminotransferase [ec:2.6.1.1]	R105		'GLU[c] + OXA[c] --> aKG[c] + ASP[c]'	Aspartate aminotransferase [ec:2.6.1.1]
R106		'ATP[c] + ASP[c] --> ADP[c] + 4-phospho-ASP[c]'	Aspartate kinase [ec:2.7.2.4]	R106		'ATP[c] + ASP[c] --> ADP[c] + 4-phospho-ASP[c]'	Aspartate kinase [ec:2.7.2.4]	R106		'ATP[c] + ASP[c] --> ADP[c] + 4-phospho-ASP[c]'	Aspartate kinase [ec:2.7.2.4]	R106		'ATP[c] + ASP[c] --> ADP[c] + 4-phospho-ASP[c]'	Aspartate kinase [ec:2.7.2.4]	R106		'ATP[c] + ASP[c] --> ADP[c] + 4-phospho-ASP[c]'	Aspartate kinase [ec:2.7.2.4]
R107		'4-phospho-ASP[c] + NADPH[c] --> ASP-4-semialdehyde[c] + Pi[c] + NADP[c]'	Aspartate-semialdehyde dehydrogenase [ec:1.2.1.11]	R107		'4-phospho-ASP[c] + NADPH[c] --> ASP-4-semialdehyde[c] + Pi[c] + NADP[c]'	Aspartate-semialdehyde dehydrogenase [ec:1.2.1.11]	R107		'4-phospho-ASP[c] + NADPH[c] --> ASP-4-semialdehyde[c] + Pi[c] + NADP[c]'	Aspartate-semialdehyde dehydrogenase [ec:1.2.1.11]	R107		'4-phospho-ASP[c] + NADPH[c] --> ASP-4-semialdehyde[c] + Pi[c] + NADP[c]'	Aspartate-semialdehyde dehydrogenase [ec:1.2.1.11]	R107		'4-phospho-ASP[c] + NADPH[c] --> ASP-4-semialdehyde[c] + Pi[c] + NADP[c]'	Aspartate-semialdehyde dehydrogenase [ec:1.2.1.11]
R108		'PYR[c] + ASP-4-semialdehyde[c] --> 4-hydroxy-2,3,4,5-Tetrahydrodipicolinate[c]'	4-hydroxy-tetrahydrodipicolinate synthase [ec:4.3.3.7]	R108		'PYR[c] + ASP-4-semialdehyde[c] --> 4-hydroxy-2,3,4,5-Tetrahydrodipicolinate[c]'	4-hydroxy-tetrahydrodipicolinate synthase [ec:4.3.3.7]	R108		'PYR[c] + ASP-4-semialdehyde[c] --> 4-hydroxy-2,3,4,5-Tetrahydrodipicolinate[c]'	4-hydroxy-tetrahydrodipicolinate synthase [ec:4.3.3.7]	R108		'PYR[c] + ASP-4-semialdehyde[c] --> 4-hydroxy-2,3,4,5-Tetrahydrodipicolinate[c]'	4-hydroxy-tetrahydrodipicolinate synthase [ec:4.3.3.7]	R108		'PYR[c] + ASP-4-semialdehyde[c] --> 4-hydroxy-2,3,4,5-Tetrahydrodipicolinate[c]'	4-hydroxy-tetrahydrodipicolinate synthase [ec:4.3.3.7]
R109		'4-hydroxy-2,3,4,5-Tetrahydrodipicolinate[c] + NADPH[c] --> 2,3,4,5-Tetrahydrodipicolinate[c] + NADP[c]'	4-hydroxy-tetrahydrodipicolinate reductase [ec:1.17.1.8]	R109		'4-hydroxy-2,3,4,5-Tetrahydrodipicolinate[c] + NADPH[c] --> 2,3,4,5-Tetrahydrodipicolinate[c] + NADP[c]'	4-hydroxy-tetrahydrodipicolinate reductase [ec:1.17.1.8]	R109		'4-hydroxy-2,3,4,5-Tetrahydrodipicolinate[c] + NADPH[c] --> 2,3,4,5-Tetrahydrodipicolinate[c] + NADP[c]'	4-hydroxy-tetrahydrodipicolinate reductase [ec:1.17.1.8]	R109		'4-hydroxy-2,3,4,5-Tetrahydrodipicolinate[c] + NADPH[c] --> 2,3,4,5-Tetrahydrodipicolinate[c] + NADP[c]'	4-hydroxy-tetrahydrodipicolinate reductase [ec:1.17.1.8]	R109		'4-hydroxy-2,3,4,5-Tetrahydrodipicolinate[c] + NADPH[c] --> 2,3,4,5-Tetrahydrodipicolinate[c] + NADP[c]'	4-hydroxy-tetrahydrodipicolinate reductase [ec:1.17.1.8]
R110		'SUC-CoA[c] + 2,3,4,5-Tetrahydrodipicolinate[c] --> H-CoA[c] + succinyl-2-amino-6-Oxoheptanedioate[c]'	2,3,4,5-tetrahydropyridine-2-carboxylate succinyltransferase [ec:2.3.1.117]	R110		'SUC-CoA[c] + 2,3,4,5-Tetrahydrodipicolinate[c] --> H-CoA[c] + succinyl-2-amino-6-Oxoheptanedioate[c]'	2,3,4,5-tetrahydropyridine-2-carboxylate succinyltransferase [ec:2.3.1.117]	R110		'SUC-CoA[c] + 2,3,4,5-Tetrahydrodipicolinate[c] --> H-CoA[c] + succinyl-2-amino-6-Oxoheptanedioate[c]'	2,3,4,5-tetrahydropyridine-2-carboxylate succinyltransferase [ec:2.3.1.117]	R110		'SUC-CoA[c] + 2,3,4,5-Tetrahydrodipicolinate[c] --> H-CoA[c] + succinyl-2-amino-6-Oxoheptanedioate[c]'	2,3,4,5-tetrahydropyridine-2-carboxylate succinyltransferase [ec:2.3.1.117]	R110		'SUC-CoA[c] + 2,3,4,5-Tetrahydrodipicolinate[c] --> H-CoA[c] + succinyl-2-amino-6-Oxoheptanedioate[c]'	2,3,4,5-tetrahydropyridine-2-carboxylate succinyltransferase [ec:2.3.1.117]
R111		'succinyl-2-amino-6-Oxoheptanedioate[c] + GLU[c] --> succinyl-2,6-Diaminoheptanedioate[c] + aKG[c]'	succinyl-diaminopimelate transaminase [ec:2.6.1.17]	R111		'succinyl-2-amino-6-Oxoheptanedioate[c] + GLU[c] --> succinyl-2,6-Diaminoheptanedioate[c] + aKG[c]'	succinyl-diaminopimelate transaminase [ec:2.6.1.17]	R111		'succinyl-2-amino-6-Oxoheptanedioate[c] + GLU[c] --> succinyl-2,6-Diaminoheptanedioate[c] + aKG[c]'	succinyl-diaminopimelate transaminase [ec:2.6.1.17]	R111		'succinyl-2-amino-6-Oxoheptanedioate[c] + GLU[c] --> succinyl-2,6-Diaminoheptanedioate[c] + aKG[c]'	succinyl-diaminopimelate transaminase [ec:2.6.1.17]	R111		'succinyl-2-amino-6-Oxoheptanedioate[c] + GLU[c] --> succinyl-2,6-Diaminoheptanedioate[c] + aKG[c]'	succinyl-diaminopimelate transaminase [ec:2.6.1.17]
R112		'succinyl-2,6-Diaminoheptanedioate[c] --> SUC[c] + 2,6-Diaminopimelate[c]'	succinyl-diaminopimelate desuccinylase [ec:3.5.1.18]	R112		'succinyl-2,6-Diaminoheptanedioate[c] --> SUC[c] + 2,6-Diaminopimelate[c]'	succinyl-diaminopimelate desuccinylase [ec:3.5.1.18]	R112		'succinyl-2,6-Diaminoheptanedioate[c] --> SUC[c] + 2,6-Diaminopimelate[c]'	succinyl-diaminopimelate desuccinylase [ec:3.5.1.18]	R112		'succinyl-2,6-Diaminoheptanedioate[c] --> SUC[c] + 2,6-Diaminopimelate[c]'	succinyl-diaminopimelate desuccinylase [ec:3.5.1.18]	R112		'succinyl-2,6-Diaminoheptanedioate[c] --> SUC[c] + 2,6-Diaminopimelate[c]'	succinyl-diaminopimelate desuccinylase [ec:3.5.1.18]
R113		'2,6-Diaminopimelate[c] --> meso-2,6-Diaminopimelate[c]'	Diaminopimelate epimerase [ec:5.1.1.7]	R113		'2,6-Diaminopimelate[c] --> meso-2,6-Diaminopimelate[c]'	Diaminopimelate epimerase [ec:5.1.1.7]	R113		'2,6-Diaminopimelate[c] --> meso-2,6-Diaminopimelate[c]'	Diaminopimelate epimerase [ec:5.1.1.7]	R113		'2,6-Diaminopimelate[c] --> meso-2,6-Diaminopimelate[c]'	Diaminopimelate epimerase [ec:5.1.1.7]	R113		'2,6-Diaminopimelate[c] --> meso-2,6-Diaminopimelate[c]'	Diaminopimelate epimerase [ec:5.1.1.7]
R114		'2,3,4,5-Tetrahydrodipicolinate[c] --> 2-amino-6-Oxoheptanedioate[c]'	non-enzymatic (R04336)	R114		'2,3,4,5-Tetrahydrodipicolinate[c] --> 2-amino-6-Oxoheptanedioate[c]'	non-enzymatic (R04336)	R114		'2,3,4,5-Tetrahydrodipicolinate[c] --> 2-amino-6-Oxoheptanedioate[c]'	non-enzymatic (R04336)	R114		'2,3,4,5-Tetrahydrodipicolinate[c] --> 2-amino-6-Oxoheptanedioate[c]'	non-enzymatic (R04336)	R114		'2,3,4,5-Tetrahydrodipicolinate[c] --> 2-amino-6-Oxoheptanedioate[c]'	non-enzymatic (R04336)
R115		'2-amino-6-Oxoheptanedioate[c] + NH3[c] + NADPH[c] --> meso-2,6-Diaminopimelate[c] + NADP[c]'	Diaminopimelate dehydrogenase [ec:1.4.1.16]	R115		'2-amino-6-Oxoheptanedioate[c] + NH3[c] + NADPH[c] --> meso-2,6-Diaminopimelate[c] + NADP[c]'	Diaminopimelate dehydrogenase [ec:1.4.1.16]	R115		'2-amino-6-Oxoheptanedioate[c] + NH3[c] + NADPH[c] --> meso-2,6-Diaminopimelate[c] + NADP[c]'	Diaminopimelate dehydrogenase [ec:1.4.1.16]	R115		'2-amino-6-Oxoheptanedioate[c] + NH3[c] + NADPH[c] --> meso-2,6-Diaminopimelate[c] + NADP[c]'	Diaminopimelate dehydrogenase [ec:1.4.1.16]	R115		'2-amino-6-Oxoheptanedioate[c] + NH3[c] + NADPH[c] --> meso-2,6-Diaminopimelate[c] + NADP[c]'	Diaminopimelate dehydrogenase [ec:1.4.1.16]
R116		'meso-2,6-Diaminopimelate[c] --> LYS[c] + CO2[c]'	Diaminopimelate decarboxylase [ec:4.1.1.20]	R116		'meso-2,6-Diaminopimelate[c] --> LYS[c] + CO2[c]'	Diaminopimelate decarboxylase [ec:4.1.1.20]	R116		'meso-2,6-Diaminopimelate[c] --> LYS[c] + CO2[c]'	Diaminopimelate decarboxylase [ec:4.1.1.20]	R116		'meso-2,6-Diaminopimelate[c] --> LYS[c] + CO2[c]'	Diaminopimelate decarboxylase [ec:4.1.1.20]	R116		'meso-2,6-Diaminopimelate[c] --> LYS[c] + CO2[c]'	Diaminopimelate decarboxylase [ec:4.1.1.20]
R117		'LYS[c] --> Cadaverine[c] + CO2[c]'	Lysine decarboxylase [ec:4.1.1.18]	R117		'LYS[c] --> Cadaverine[c] + CO2[c]'	Lysine decarboxylase [ec:4.1.1.18]	R117		'LYS[c] --> Cadaverine[c] + CO2[c]'	Lysine decarboxylase [ec:4.1.1.18]	R117		'LYS[c] --> Cadaverine[c] + CO2[c]'	Lysine decarboxylase [ec:4.1.1.18]	R117		'LYS[c] --> Cadaverine[c] + CO2[c]'	Lysine decarboxylase [ec:4.1.1.18]
R118		'Cadaverine[c] + aKG[c] --> 5-Aminopentanal[c] + GLU[c]'	Putrescine:2-oxoglutarate transaminase [ec:2.6.1.82]	R118		'Cadaverine[c] + aKG[c] --> 5-Aminopentanal[c] + GLU[c]'	Putrescine:2-oxoglutarate transaminase [ec:2.6.1.82]	R118		'Cadaverine[c] + aKG[c] --> 5-Aminopentanal[c] + GLU[c]'	Putrescine:2-oxoglutarate transaminase [ec:2.6.1.82]	R118		'Cadaverine[c] + aKG[c] --> 5-Aminopentanal[c] + GLU[c]'	Putrescine:2-oxoglutarate transaminase [ec:2.6.1.82]	R118		'Cadaverine[c] + aKG[c] --> 5-Aminopentanal[c] + GLU[c]'	Putrescine:2-oxoglutarate transaminase [ec:2.6.1.82]
R119		'5-Aminopentanal[c] + NAD[c] --> 5-Aminopentanoate[c] + NADH[c]'	Aminobutyraldehyde dehydrogenase [ec:1.2.1.19]	R119		'5-Aminopentanal[c] + NAD[c] --> 5-Aminopentanoate[c] + NADH[c]'	Aminobutyraldehyde dehydrogenase [ec:1.2.1.19]	R119		'5-Aminopentanal[c] + NAD[c] --> 5-Aminopentanoate[c] + NADH[c]'	Aminobutyraldehyde dehydrogenase [ec:1.2.1.19]	R119		'5-Aminopentanal[c] + NAD[c] --> 5-Aminopentanoate[c] + NADH[c]'	Aminobutyraldehyde dehydrogenase [ec:1.2.1.19]	R119		'5-Aminopentanal[c] + NAD[c] --> 5-Aminopentanoate[c] + NADH[c]'	Aminobutyraldehyde dehydrogenase [ec:1.2.1.19]
R120		'LYS[c] + O2[c] --> 5-Aminopentanamide[c] + CO2[c]'	Lysine 2-monooxygenase [ec:1.13.12.2]	R120		'LYS[c] + O2[c] --> 5-Aminopentanamide[c] + CO2[c]'	Lysine 2-monooxygenase [ec:1.13.12.2]	R120		'LYS[c] + O2[c] --> 5-Aminopentanamide[c] + CO2[c]'	Lysine 2-monooxygenase [ec:1.13.12.2]	R120		'LYS[c] + O2[c] --> 5-Aminopentanamide[c] + CO2[c]'	Lysine 2-monooxygenase [ec:1.13.12.2]	R120		'LYS[c] + O2[c] --> 5-Aminopentanamide[c] + CO2[c]'	Lysine 2-monooxygenase [ec:1.13.12.2]
R121		'5-Aminopentanamide[c] --> 5-Aminopentanoate[c] + NH3[c]'	5-Aminopentanamidase [ec:3.5.1.30]	R121		'5-Aminopentanamide[c] --> 5-Aminopentanoate[c] + NH3[c]'	5-Aminopentanamidase [ec:3.5.1.30]	R121		'5-Aminopentanamide[c] --> 5-Aminopentanoate[c] + NH3[c]'	5-Aminopentanamidase [ec:3.5.1.30]	R121		'5-Aminopentanamide[c] --> 5-Aminopentanoate[c] + NH3[c]'	5-Aminopentanamidase [ec:3.5.1.30]	R121		'5-Aminopentanamide[c] --> 5-Aminopentanoate[c] + NH3[c]'	5-Aminopentanamidase [ec:3.5.1.30]
R122		'5-Aminopentanoate[c] + aKG[c] --> 5-Oxopentanoate[c] + GLU[c]'	5-Aminovalerate transaminase [ec:2.6.1.48]	R122		'5-Aminopentanoate[c] + aKG[c] --> 5-Oxopentanoate[c] + GLU[c]'	5-Aminovalerate transaminase [ec:2.6.1.48]	R122		'5-Aminopentanoate[c] + aKG[c] --> 5-Oxopentanoate[c] + GLU[c]'	5-Aminovalerate transaminase [ec:2.6.1.48]	R122		'5-Aminopentanoate[c] + aKG[c] --> 5-Oxopentanoate[c] + GLU[c]'	5-Aminovalerate transaminase [ec:2.6.1.48]	R122		'5-Aminopentanoate[c] + aKG[c] --> 5-Oxopentanoate[c] + GLU[c]'	5-Aminovalerate transaminase [ec:2.6.1.48]
R123		'5-Oxopentanoate[c] + NADH[c] --> 5-Hydroxypentanoate[c] + NAD[c]'	5-Hydroxypentanoate:NAD oxidoreductase	R123		'5-Oxopentanoate[c] + NADH[c] --> 5-Hydroxypentanoate[c] + NAD[c]'	5-Hydroxypentanoate:NAD oxidoreductase	R123		'5-Oxopentanoate[c] + NADH[c] --> 5-Hydroxypentanoate[c] + NAD[c]'	5-Hydroxypentanoate:NAD oxidoreductase	R123		'5-Oxopentanoate[c] + NADH[c] --> 5-Hydroxypentanoate[c] + NAD[c]'	5-Hydroxypentanoate:NAD oxidoreductase	R123		'5-Oxopentanoate[c] + NADH[c] --> 5-Hydroxypentanoate[c] + NAD[c]'	5-Hydroxypentanoate:NAD oxidoreductase
R124		'AC-CoA[c] + 5-Hydroxypentanoate[c] --> AC[c] + 5-Hydroxypentanoyl-CoA[c]'	5-Hydroxypentanoate CoA-transferase [ec:2.8.3.14]	R124		'AC-CoA[c] + 5-Hydroxypentanoate[c] --> AC[c] + 5-Hydroxypentanoyl-CoA[c]'	5-Hydroxypentanoate CoA-transferase [ec:2.8.3.14]	R124		'AC-CoA[c] + 5-Hydroxypentanoate[c] --> AC[c] + 5-Hydroxypentanoyl-CoA[c]'	5-Hydroxypentanoate CoA-transferase [ec:2.8.3.14]	R124		'AC-CoA[c] + 5-Hydroxypentanoate[c] --> AC[c] + 5-Hydroxypentanoyl-CoA[c]'	5-Hydroxypentanoate CoA-transferase [ec:2.8.3.14]	R124		'AC-CoA[c] + 5-Hydroxypentanoate[c] --> AC[c] + 5-Hydroxypentanoyl-CoA[c]'	5-Hydroxypentanoate CoA-transferase [ec:2.8.3.14]
R125		'5-Hydroxypentanoyl-CoA[c] --> P-5HV[c] + H-CoA[c]'	Poly(hydroxyalkanoate) synthase [ec:2.3.1.-]	R125		'5-Hydroxypentanoyl-CoA[c] --> P-5HV[c] + H-CoA[c]'	Poly(hydroxyalkanoate) synthase [ec:2.3.1.-]	R125		'5-Hydroxypentanoyl-CoA[c] --> P-5HV[c] + H-CoA[c]'	Poly(hydroxyalkanoate) synthase [ec:2.3.1.-]	R125		'5-Hydroxypentanoyl-CoA[c] --> P-5HV[c] + H-CoA[c]'	Poly(hydroxyalkanoate) synthase [ec:2.3.1.-]	R125		'5-Hydroxypentanoyl-CoA[c] --> P-5HV[c] + H-CoA[c]'	Poly(hydroxyalkanoate) synthase [ec:2.3.1.-]
	};				};				};				};				};
	mnet = CalculateFluxModes(ReactionFormulas,CreateFluxModeOpts('parse-only',true));				mnet = CalculateFluxModes(ReactionFormulas,CreateFluxModeOpts('parse-only',true));				mnet = CalculateFluxModes(ReactionFormulas,CreateFluxModeOpts('parse-only',true));				mnet = CalculateFluxModes(ReactionFormulas,CreateFluxModeOpts('parse-only',true));				mnet = CalculateFluxModes(ReactionFormulas,CreateFluxModeOpts('parse-only',true));

## Sheet: P3HC
	C. necator on Fructose + CO2				C. necator on Glycerol + CO2				C. necator on Acetate + CO2				C. necator on Formate + CO2				C. necator on CO2 + H2
RxN		Equation	Function / Enzyme	RxN		Equation	Function / Enzyme	RxN		Equation	Function / Enzyme	RxN		Equation	Function / Enzyme	RxN		Equation	Function / Enzyme
R1	ReactionFormulas = {	'--> CO2[e]'	Carbondioxide in	R1	ReactionFormulas = {	'--> CO2[e]'	Carbondioxide in	R1	ReactionFormulas = {	'--> CO2[e]'	Carbondioxide in	R1	ReactionFormulas = {	'--> CO2[e]'	Carbondioxide in	R1	ReactionFormulas = {	'--> CO2[e]'	Carbondioxide in
R2		'--> FRC[e]'	Fructose in	R2		'--> GLY[e]'	Fructose in	R2		'--> AC[e]'	Fructose in	R2		'--> FOR[e]'	Fructose in	R2		'--> H2[e]'	Hydrogen in
R3		'--> NH3[e]'	Ammonia in	R3		'--> NH3[e]'	Ammonia in	R3		'--> NH3[e]'	Ammonia in	R3		'--> NH3[e]'	Ammonia in	R3		'--> NH3[e]'	Ammonia in
R4		'--> O2[e]'	Oxygen in	R4		'--> O2[e]'	Oxygen in	R4		'--> O2[e]'	Oxygen in	R4		'--> O2[e]'	Oxygen in	R4		'--> O2[e]'	Oxygen in
R5		'CO2[e] -->'	Carbondioxide out	R5		'CO2[e] -->'	Carbondioxide out	R5		'CO2[e] -->'	Carbondioxide out	R5		'CO2[e] -->'	Carbondioxide out	R5		'CO2[e] -->'	Carbondioxide out
R6		'FOR[e] -->'	Formate out	R6		'FOR[e] -->'	Formate out	R6		'FOR[e] -->'	Formate out	R6		'FOR[e] -->'	Formate out	R6		'FOR[e] -->'	Formate out
R7		'AC[e] -->'	Acetate out	R7		'AC[e] -->'	Acetate out	R7		'AC[e] -->'	Acetate out	R7		'AC[e] -->'	Acetate out	R7		'AC[e] -->'	Acetate out
R8		'ETOH[e] -->'	Ethanol out	R8		'ETOH[e] -->'	Ethanol out	R8		'ETOH[e] -->'	Ethanol out	R8		'ETOH[e] -->'	Ethanol out	R8		'ETOH[e] -->'	Ethanol out
R9		'LAC[e] -->'	Lactate out	R9		'LAC[e] -->'	Lactate out	R9		'LAC[e] -->'	Lactate out	R9		'LAC[e] -->'	Lactate out	R9		'LAC[e] -->'	Lactate out
R10		'ACETONE[e] -->'	Acetone out	R10		'ACETONE[e] -->'	Acetone out	R10		'ACETONE[e] -->'	Acetone out	R10		'ACETONE[e] -->'	Acetone out	R10		'ACETONE[e] -->'	Acetone out
R11		'SUC[e] -->'	Succinate out	R11		'SUC[e] -->'	Succinate out	R11		'SUC[e] -->'	Succinate out	R11		'SUC[e] -->'	Succinate out	R11		'SUC[e] -->'	Succinate out
R12		'PHB[e] -->'	Polyhydroxybutyrate out	R12		'PHB[e] -->'	Polyhydroxybutyrate out	R12		'PHB[e] -->'	Polyhydroxybutyrate out	R12		'PHB[e] -->'	Polyhydroxybutyrate out	R12		'PHB[e] -->'	Polyhydroxybutyrate out
R13		'BIOMASS[e] -->'	Biomass out	R13		'BIOMASS[e] -->'	Biomass out	R13		'BIOMASS[e] -->'	Biomass out	R13		'BIOMASS[e] -->'	Biomass out	R13		'BIOMASS[e] -->'	Biomass out
R14		'PRODUCT[e] -->'	Product out	R14		'PRODUCT[e] -->'	Product out	R14		'PRODUCT[e] -->'	Product out	R14		'PRODUCT[e] -->'	Product out	R14		'PRODUCT[e] -->'	Product out
R15		'FOR[c] + H[c] + 0.3 ATP[c] --> FOR[e] + H[e] + 0.3 ADP[c] + 0.3 Pi[c]'	Formate export by ABC transporter	R15		'FOR[c] + H[c] + 0.3 ATP[c] --> FOR[e] + H[e] + 0.3 ADP[c] + 0.3 Pi[c]'	Formate export by ABC transporter	R15		'FOR[c] + H[c] + 0.3 ATP[c] --> FOR[e] + H[e] + 0.3 ADP[c] + 0.3 Pi[c]'	Formate export by ABC transporter	R15		'FOR[c] + H[c] <-- FOR[e] + H[e]'	Formate export by ABC transporter	R15		'FOR[c] + H[c] + 0.3 ATP[c] --> FOR[e] + H[e] + 0.3 ADP[c] + 0.3 Pi[c]'	Formate export by ABC transporter
R16		'AC[c] + H[c] + 0.3 ATP[c] --> AC[e] + H[e] + 0.3 ADP[c] + 0.3 Pi[c]'	Acetate export by ABC transporter	R16		'AC[c] + H[c] + 0.3 ATP[c] --> AC[e] + H[e] + 0.3 ADP[c] + 0.3 Pi[c]'	Acetate export by ABC transporter	R16		'AC[c] + H[c] <-- AC[e] + H[e]'	Acetate export by ABC transporter	R16		'AC[c] + H[c] + 0.3 ATP[c] --> AC[e] + H[e] + 0.3 ADP[c] + 0.3 Pi[c]'	Acetate export by ABC transporter	R16		'AC[c] + H[c] + 0.3 ATP[c] --> AC[e] + H[e] + 0.3 ADP[c] + 0.3 Pi[c]'	Acetate export by ABC transporter
R17		'ETOH[c] --> ETOH[e]'	Ethanol export by diffusion	R17		'ETOH[c] --> ETOH[e]'	Ethanol export by diffusion	R17		'ETOH[c] --> ETOH[e]'	Ethanol export by diffusion	R17		'ETOH[c] --> ETOH[e]'	Ethanol export by diffusion	R17		'ETOH[c] --> ETOH[e]'	Ethanol export by diffusion
R18		'LAC[c] + H[c] + 0.3 ATP[c] --> LAC[e] + H[e] + 0.3 ADP[c] + 0.3 Pi[c]'	Lactate export by ABC transporter	R18		'LAC[c] + H[c] + 0.3 ATP[c] --> LAC[e] + H[e] + 0.3 ADP[c] + 0.3 Pi[c]'	Lactate export by ABC transporter	R18		'LAC[c] + H[c] + 0.3 ATP[c] --> LAC[e] + H[e] + 0.3 ADP[c] + 0.3 Pi[c]'	Lactate export by ABC transporter	R18		'LAC[c] + H[c] + 0.3 ATP[c] --> LAC[e] + H[e] + 0.3 ADP[c] + 0.3 Pi[c]'	Lactate export by ABC transporter	R18		'LAC[c] + H[c] + 0.3 ATP[c] --> LAC[e] + H[e] + 0.3 ADP[c] + 0.3 Pi[c]'	Lactate export by ABC transporter
R19		'ACETONE[c] --> ACETONE[e]'	Acetone export by diffusion	R19		'ACETONE[c] --> ACETONE[e]'	Acetone export by diffusion	R19		'ACETONE[c] --> ACETONE[e]'	Acetone export by diffusion	R19		'ACETONE[c] --> ACETONE[e]'	Acetone export by diffusion	R19		'ACETONE[c] --> ACETONE[e]'	Acetone export by diffusion
R20		'SUC[c] + 2 H[c] + 0.6 ATP[c] --> SUC[e] + 2 H[e] + 0.6 ADP[c] + 0.6 Pi[c]'	Succinate export by ABC transporter	R20		'SUC[c] + 2 H[c] + 0.6 ATP[c] --> SUC[e] + 2 H[e] + 0.6 ADP[c] + 0.6 Pi[c]'	Succinate export by ABC transporter	R20		'SUC[c] + 2 H[c] + 0.6 ATP[c] --> SUC[e] + 2 H[e] + 0.6 ADP[c] + 0.6 Pi[c]'	Succinate export by ABC transporter	R20		'SUC[c] + 2 H[c] + 0.6 ATP[c] --> SUC[e] + 2 H[e] + 0.6 ADP[c] + 0.6 Pi[c]'	Succinate export by ABC transporter	R20		'SUC[c] + 2 H[c] + 0.6 ATP[c] --> SUC[e] + 2 H[e] + 0.6 ADP[c] + 0.6 Pi[c]'	Succinate export by ABC transporter
R21		'BIOMASS[c] --> BIOMASS[e]'	Growth	R21		'BIOMASS[c] --> BIOMASS[e]'	Growth	R21		'BIOMASS[c] --> BIOMASS[e]'	Growth	R21		'BIOMASS[c] --> BIOMASS[e]'	Growth	R21		'BIOMASS[c] --> BIOMASS[e]'	Growth
R22		'P-3HC[c] --> PRODUCT[e]'	Product formation	R22		'P-3HC[c] --> PRODUCT[e]'	Product formation	R22		'P-3HC[c] --> PRODUCT[e]'	Product formation	R22		'P-3HC[c] --> PRODUCT[e]'	Product formation	R22		'P-3HC[c] --> PRODUCT[e]'	Product formation
R23		'O2[e] --> O2[c]'	Oxygen import by diffusion	R23		'O2[e] --> O2[c]'	Oxygen import by diffusion	R23		'O2[e] --> O2[c]'	Oxygen import by diffusion	R23		'O2[e] --> O2[c]'	Oxygen import by diffusion	R23		'O2[e] --> O2[c]'	Oxygen import by diffusion
R24		'NH3[e] --> NH3[c]'	Ammonia import by diffusion	R24		'NH3[e] --> NH3[c]'	Ammonia import by diffusion	R24		'NH3[e] --> NH3[c]'	Ammonia import by diffusion	R24		'NH3[e] --> NH3[c]'	Ammonia import by diffusion	R24		'NH3[e] --> NH3[c]'	Ammonia import by diffusion
R25		'H2[e] --> H2[c]'	Hydrogen import by diffusion	R25		'H2[e] --> H2[c]'	Hydrogen import by diffusion	R25		'H2[e] --> H2[c]'	Hydrogen import by diffusion	R25		'H2[e] --> H2[c]'	Hydrogen import by diffusion	R25		'H2[e] --> H2[c]'	Hydrogen import by diffusion
R26		'CO2[e] <--> CO2[c]'	Carbondioxide import by diffusion	R26		'CO2[e] <--> CO2[c]'	Carbondioxide import by diffusion	R26		'CO2[e] <--> CO2[c]'	Carbondioxide import by diffusion	R26		'CO2[e] <--> CO2[c]'	Carbondioxide import by diffusion	R26		'CO2[e] <--> CO2[c]'	Carbondioxide exchange by diffusion
R27		'FRC[e] + PEP[c] --> F6P[c] + PYR[c]'	PTS [ec:2.7.1.69]	R27		'FRC[e] + PEP[c] --> F6P[c] + PYR[c]'	PTS [ec:2.7.1.69]	R27		'FRC[e] + PEP[c] --> F6P[c] + PYR[c]'	PTS [ec:2.7.1.69]	R27		'FRC[e] + PEP[c] --> F6P[c] + PYR[c]'	PTS [ec:2.7.1.69]	R27		'FRC[e] + PEP[c] --> F6P[c] + PYR[c]'	PTS [ec:2.7.1.69]
R28		'GLY[e] + ATP[c] --> ADP[c] + GLY3P[c]'	Glycerol kinase [ec:2.7.1.30]	R28		'GLY[e] + ATP[c] --> ADP[c] + GLY3P[c]'	Glycerol kinase [ec:2.7.1.30]	R28		'GLY[e] + ATP[c] --> ADP[c] + GLY3P[c]'	Glycerol kinase [ec:2.7.1.30]	R28		'GLY[e] + ATP[c] --> ADP[c] + GLY3P[c]'	Glycerol kinase [ec:2.7.1.30]	R28		'GLY[e] + ATP[c] --> ADP[c] + GLY3P[c]'	Glycerol kinase [ec:2.7.1.30]
R29		'G6P[c] + NADP[c] --> 6-PG-lac[c] + NADPH[c]'	Glucose-6-phosphate dehydrogenase [ec:1.1.1.49]	R29		'G6P[c] + NADP[c] --> 6-PG-lac[c] + NADPH[c]'	Glucose-6-phosphate dehydrogenase [ec:1.1.1.49]	R29		'G6P[c] + NADP[c] --> 6-PG-lac[c] + NADPH[c]'	Glucose-6-phosphate dehydrogenase [ec:1.1.1.49]	R29		'G6P[c] + NADP[c] --> 6-PG-lac[c] + NADPH[c]'	Glucose-6-phosphate dehydrogenase [ec:1.1.1.49]	R29		'G6P[c] + NADP[c] --> 6-PG-lac[c] + NADPH[c]'	Glucose-6-phosphate dehydrogenase [ec:1.1.1.49]
R30		'6-PG-lac[c] --> 6-PG[c]'	6-phosphogluconolactonase [ec:3.1.1.31]	R30		'6-PG-lac[c] --> 6-PG[c]'	6-phosphogluconolactonase [ec:3.1.1.31]	R30		'6-PG-lac[c] --> 6-PG[c]'	6-phosphogluconolactonase [ec:3.1.1.31]	R30		'6-PG-lac[c] --> 6-PG[c]'	6-phosphogluconolactonase [ec:3.1.1.31]	R30		'6-PG-lac[c] --> 6-PG[c]'	6-phosphogluconolactonase [ec:3.1.1.31]
R31		'6-PG[c] --> KDPG[c]'	6-phosphogluconate dehydratase [ec:4.2.1.12]	R31		'6-PG[c] --> KDPG[c]'	6-phosphogluconate dehydratase [ec:4.2.1.12]	R31		'6-PG[c] --> KDPG[c]'	6-phosphogluconate dehydratase [ec:4.2.1.12]	R31		'6-PG[c] --> KDPG[c]'	6-phosphogluconate dehydratase [ec:4.2.1.12]	R31		'6-PG[c] --> KDPG[c]'	6-phosphogluconate dehydratase [ec:4.2.1.12]
R32		'KDPG[c] --> G3P[c] + PYR[c]'	2-keto-3-deoxy-6-phosphogluconate aldolase [ec:4.1.2.14]	R32		'KDPG[c] --> G3P[c] + PYR[c]'	2-keto-3-deoxy-6-phosphogluconate aldolase [ec:4.1.2.14]	R32		'KDPG[c] --> G3P[c] + PYR[c]'	2-keto-3-deoxy-6-phosphogluconate aldolase [ec:4.1.2.14]	R32		'KDPG[c] --> G3P[c] + PYR[c]'	2-keto-3-deoxy-6-phosphogluconate aldolase [ec:4.1.2.14]	R32		'KDPG[c] --> G3P[c] + PYR[c]'	2-keto-3-deoxy-6-phosphogluconate aldolase [ec:4.1.2.14]
R33		'6-PG[c] + NADP[c] --> Ril5P[c] + NADPH[c] + CO2[c]'	6-phosphogluconate dehydrogenase [ec:1.1.1.44]	R33		'6-PG[c] + NADP[c] --> Ril5P[c] + NADPH[c] + CO2[c]'	6-phosphogluconate dehydrogenase [ec:1.1.1.44]	R33		'6-PG[c] + NADP[c] --> Ril5P[c] + NADPH[c] + CO2[c]'	6-phosphogluconate dehydrogenase [ec:1.1.1.44]	R33		'6-PG[c] + NADP[c] --> Ril5P[c] + NADPH[c] + CO2[c]'	6-phosphogluconate dehydrogenase [ec:1.1.1.44]	R33		'6-PG[c] + NADP[c] --> Ril5P[c] + NADPH[c] + CO2[c]'	6-phosphogluconate dehydrogenase [ec:1.1.1.44]
R34		'Ril5P[c] + ATP[c] --> Ril15BP[c] + ADP[c]'	Phosphoribulokinase [ec:2.7.1.19]	R34		'Ril5P[c] + ATP[c] --> Ril15BP[c] + ADP[c]'	Phosphoribulokinase [ec:2.7.1.19]	R34		'Ril5P[c] + ATP[c] --> Ril15BP[c] + ADP[c]'	Phosphoribulokinase [ec:2.7.1.19]	R34		'Ril5P[c] + ATP[c] --> Ril15BP[c] + ADP[c]'	Phosphoribulokinase [ec:2.7.1.19]	R34		'Ril5P[c] + ATP[c] --> Ril15BP[c] + ADP[c]'	Phosphoribulokinase [ec:2.7.1.19]
R35		'5 Ril15BP[c] + 4 CO2[c] + 1 O2[c] --> 9 3-PG[c] + 1 PG[c]'	Ribulose-1,5-bisphosphate carboxylase/oxygenase (RuBisCO) "best case" [ec:4.1.1.39]	R35		'5 Ril15BP[c] + 4 CO2[c] + 1 O2[c] --> 9 3-PG[c] + 1 PG[c]'	Ribulose-1,5-bisphosphate carboxylase/oxygenase (RuBisCO) "best case" [ec:4.1.1.39]	R35		'5 Ril15BP[c] + 4 CO2[c] + 1 O2[c] --> 9 3-PG[c] + 1 PG[c]'	Ribulose-1,5-bisphosphate carboxylase/oxygenase (RuBisCO) "best case" [ec:4.1.1.39]	R35		'5 Ril15BP[c] + 4 CO2[c] + 1 O2[c] --> 9 3-PG[c] + 1 PG[c]'	Ribulose-1,5-bisphosphate carboxylase/oxygenase (RuBisCO) "best case" [ec:4.1.1.39]	R35		'5 Ril15BP[c] + 4 CO2[c] + 1 O2[c] --> 9 3-PG[c] + 1 PG[c]'	Ribulose-1,5-bisphosphate carboxylase/oxygenase (RuBisCO) "best case" [ec:4.1.1.39]
R36		'4 Ril15BP[c] + 3 CO2[c] + 1 O2[c] --> 7 3-PG[c] + 1 PG[c]'	Ribulose-1,5-bisphosphate carboxylase/oxygenase (RuBisCO) "worst case" [ec:4.1.1.39]	R36		'4 Ril15BP[c] + 3 CO2[c] + 1 O2[c] --> 7 3-PG[c] + 1 PG[c]'	Ribulose-1,5-bisphosphate carboxylase/oxygenase (RuBisCO) "worst case" [ec:4.1.1.39]	R36		'4 Ril15BP[c] + 3 CO2[c] + 1 O2[c] --> 7 3-PG[c] + 1 PG[c]'	Ribulose-1,5-bisphosphate carboxylase/oxygenase (RuBisCO) "worst case" [ec:4.1.1.39]	R36		'4 Ril15BP[c] + 3 CO2[c] + 1 O2[c] --> 7 3-PG[c] + 1 PG[c]'	Ribulose-1,5-bisphosphate carboxylase/oxygenase (RuBisCO) "worst case" [ec:4.1.1.39]	R36		'4 Ril15BP[c] + 3 CO2[c] + 1 O2[c] --> 7 3-PG[c] + 1 PG[c]'	Ribulose-1,5-bisphosphate carboxylase/oxygenase (RuBisCO) "worst case" [ec:4.1.1.39]
R37		'PG[c] --> GA[c] + Pi[c]'	2-phosphoglycolate phosphohydrolase [ec:3.1.3.18]	R37		'PG[c] --> GA[c] + Pi[c]'	2-phosphoglycolate phosphohydrolase [ec:3.1.3.18]	R37		'PG[c] --> GA[c] + Pi[c]'	2-phosphoglycolate phosphohydrolase [ec:3.1.3.18]	R37		'PG[c] --> GA[c] + Pi[c]'	2-phosphoglycolate phosphohydrolase [ec:3.1.3.18]	R37		'PG[c] --> GA[c] + Pi[c]'	2-phosphoglycolate phosphohydrolase [ec:3.1.3.18]
R38		'2 GA[c] + O2[c] --> 2 GLYOX[c]'	Glycolate dehydrogenase [ec:1.1.99.14]	R38		'2 GA[c] + O2[c] --> 2 GLYOX[c]'	Glycolate dehydrogenase [ec:1.1.99.14]	R38		'2 GA[c] + O2[c] --> 2 GLYOX[c]'	Glycolate dehydrogenase [ec:1.1.99.14]	R38		'2 GA[c] + O2[c] --> 2 GLYOX[c]'	Glycolate dehydrogenase [ec:1.1.99.14]	R38		'2 GA[c] + O2[c] --> 2 GLYOX[c]'	Glycolate dehydrogenase [ec:1.1.99.14]
R39		'2 GLYOX[c] --> TS[c] + CO2[c]'	Tartronate-semialdehyde synthase [ec:4.1.1.47]	R39		'2 GLYOX[c] --> TS[c] + CO2[c]'	Tartronate-semialdehyde synthase [ec:4.1.1.47]	R39		'2 GLYOX[c] --> TS[c] + CO2[c]'	Tartronate-semialdehyde synthase [ec:4.1.1.47]	R39		'2 GLYOX[c] --> TS[c] + CO2[c]'	Tartronate-semialdehyde synthase [ec:4.1.1.47]	R39		'2 GLYOX[c] --> TS[c] + CO2[c]'	Tartronate-semialdehyde synthase [ec:4.1.1.47]
R40		'TS[c] + NADH[c] --> Glycerate[c] + NAD[c]'	2-hydroxy-3-oxopropionate reductase [ec:1.1.1.60]	R40		'TS[c] + NADH[c] --> Glycerate[c] + NAD[c]'	2-hydroxy-3-oxopropionate reductase [ec:1.1.1.60]	R40		'TS[c] + NADH[c] --> Glycerate[c] + NAD[c]'	2-hydroxy-3-oxopropionate reductase [ec:1.1.1.60]	R40		'TS[c] + NADH[c] --> Glycerate[c] + NAD[c]'	2-hydroxy-3-oxopropionate reductase [ec:1.1.1.60]	R40		'TS[c] + NADH[c] --> Glycerate[c] + NAD[c]'	2-hydroxy-3-oxopropionate reductase [ec:1.1.1.60]
R41		'Glycerate[c] + ATP[c] --> 2-PG[c] + ADP[c]'	Glycerate 2-kinase [ec:2.7.1.165]	R41		'Glycerate[c] + ATP[c] --> 2-PG[c] + ADP[c]'	Glycerate 2-kinase [ec:2.7.1.165]	R41		'Glycerate[c] + ATP[c] --> 2-PG[c] + ADP[c]'	Glycerate 2-kinase [ec:2.7.1.165]	R41		'Glycerate[c] + ATP[c] --> 2-PG[c] + ADP[c]'	Glycerate 2-kinase [ec:2.7.1.165]	R41		'Glycerate[c] + ATP[c] --> 2-PG[c] + ADP[c]'	Glycerate 2-kinase [ec:2.7.1.165]
R42		'Ril5P[c] <--> R5P[c]'	Ribose-5-phosphate isomerase [ec:5.3.1.6]	R42		'Ril5P[c] <--> R5P[c]'	Ribose-5-phosphate isomerase [ec:5.3.1.6]	R42		'Ril5P[c] <--> R5P[c]'	Ribose-5-phosphate isomerase [ec:5.3.1.6]	R42		'Ril5P[c] <--> R5P[c]'	Ribose-5-phosphate isomerase [ec:5.3.1.6]	R42		'Ril5P[c] <--> R5P[c]'	Ribose-5-phosphate isomerase [ec:5.3.1.6]
R43		'Ril5P[c] <--> X5P[c]'	Ribulose-phosphate 3-epimerase [ec:5.1.3.1]	R43		'Ril5P[c] <--> X5P[c]'	Ribulose-phosphate 3-epimerase [ec:5.1.3.1]	R43		'Ril5P[c] <--> X5P[c]'	Ribulose-phosphate 3-epimerase [ec:5.1.3.1]	R43		'Ril5P[c] <--> X5P[c]'	Ribulose-phosphate 3-epimerase [ec:5.1.3.1]	R43		'Ril5P[c] <--> X5P[c]'	Ribulose-phosphate 3-epimerase [ec:5.1.3.1]
R44		'R5P[c] + X5P[c] <--> G3P[c] + S7P[c]'	Transketolase [ec:2.2.1.1]	R44		'R5P[c] + X5P[c] <--> G3P[c] + S7P[c]'	Transketolase [ec:2.2.1.1]	R44		'R5P[c] + X5P[c] <--> G3P[c] + S7P[c]'	Transketolase [ec:2.2.1.1]	R44		'R5P[c] + X5P[c] <--> G3P[c] + S7P[c]'	Transketolase [ec:2.2.1.1]	R44		'R5P[c] + X5P[c] <--> G3P[c] + S7P[c]'	Transketolase [ec:2.2.1.1]
R45		'G3P[c] + S7P[c] <--> E4P[c] + F6P[c]'	Transaldolase [ec:2.2.1.2]	R45		'G3P[c] + S7P[c] <--> E4P[c] + F6P[c]'	Transaldolase [ec:2.2.1.2]	R45		'G3P[c] + S7P[c] <--> E4P[c] + F6P[c]'	Transaldolase [ec:2.2.1.2]	R45		'G3P[c] + S7P[c] <--> E4P[c] + F6P[c]'	Transaldolase [ec:2.2.1.2]	R45		'G3P[c] + S7P[c] <--> E4P[c] + F6P[c]'	Transaldolase [ec:2.2.1.2]
R46		'X5P[c] + E4P[c] <--> F6P[c] + G3P[c]'	Transketolase [ec:2.2.1.1]	R46		'X5P[c] + E4P[c] <--> F6P[c] + G3P[c]'	Transketolase [ec:2.2.1.1]	R46		'X5P[c] + E4P[c] <--> F6P[c] + G3P[c]'	Transketolase [ec:2.2.1.1]	R46		'X5P[c] + E4P[c] <--> F6P[c] + G3P[c]'	Transketolase [ec:2.2.1.1]	R46		'X5P[c] + E4P[c] <--> F6P[c] + G3P[c]'	Transketolase [ec:2.2.1.1]
R47		'G6P[c] <--> F6P[c]'	Glucose-6-phosphate isomerase [ec:5.3.1.9]	R47		'G6P[c] <--> F6P[c]'	Glucose-6-phosphate isomerase [ec:5.3.1.9]	R47		'G6P[c] <--> F6P[c]'	Glucose-6-phosphate isomerase [ec:5.3.1.9]	R47		'G6P[c] <--> F6P[c]'	Glucose-6-phosphate isomerase [ec:5.3.1.9]	R47		'G6P[c] <--> F6P[c]'	Glucose-6-phosphate isomerase [ec:5.3.1.9]
R48		'F16BP[c] --> F6P[c] + Pi[c]'	Fructose-bisphosphatase [ec:3.1.3.11]	R48		'F16BP[c] --> F6P[c] + Pi[c]'	Fructose-bisphosphatase [ec:3.1.3.11]	R48		'F16BP[c] --> F6P[c] + Pi[c]'	Fructose-bisphosphatase [ec:3.1.3.11]	R48		'F16BP[c] --> F6P[c] + Pi[c]'	Fructose-bisphosphatase [ec:3.1.3.11]	R48		'F16BP[c] --> F6P[c] + Pi[c]'	Fructose-bisphosphatase [ec:3.1.3.11]
R49		'F16BP[c] <--> G3P[c] + DHAP[c]'	Fructose-bisphosphate aldolase [ec:4.1.2.13]	R49		'F16BP[c] <--> G3P[c] + DHAP[c]'	Fructose-bisphosphate aldolase [ec:4.1.2.13]	R49		'F16BP[c] <--> G3P[c] + DHAP[c]'	Fructose-bisphosphate aldolase [ec:4.1.2.13]	R49		'F16BP[c] <--> G3P[c] + DHAP[c]'	Fructose-bisphosphate aldolase [ec:4.1.2.13]	R49		'F16BP[c] <--> G3P[c] + DHAP[c]'	Fructose-bisphosphate aldolase [ec:4.1.2.13]
R50		'GLY3P[c] + NAD[c] --> DHAP[c] + NADH[c]'	Glycerol-3-phosphate dehydrogenase [ec:1.1.1.8]	R50		'GLY3P[c] + NAD[c] --> DHAP[c] + NADH[c]'	Glycerol-3-phosphate dehydrogenase [ec:1.1.1.8]	R50		'GLY3P[c] + NAD[c] --> DHAP[c] + NADH[c]'	Glycerol-3-phosphate dehydrogenase [ec:1.1.1.8]	R50		'GLY3P[c] + NAD[c] --> DHAP[c] + NADH[c]'	Glycerol-3-phosphate dehydrogenase [ec:1.1.1.8]	R50		'GLY3P[c] + NAD[c] --> DHAP[c] + NADH[c]'	Glycerol-3-phosphate dehydrogenase [ec:1.1.1.8]
R51		'DHAP[c] <--> G3P[c]'	Triose-phosphate isomerase [ec:5.3.1.1]	R51		'DHAP[c] <--> G3P[c]'	Triose-phosphate isomerase [ec:5.3.1.1]	R51		'DHAP[c] <--> G3P[c]'	Triose-phosphate isomerase [ec:5.3.1.1]	R51		'DHAP[c] <--> G3P[c]'	Triose-phosphate isomerase [ec:5.3.1.1]	R51		'DHAP[c] <--> G3P[c]'	Triose-phosphate isomerase [ec:5.3.1.1]
R52		'G3P[c] + NAD[c] + Pi[c] <--> BPG[c] + NADH[c]'	Glyceraldehyde 3-phosphate dehydrogenase [ec:1.2.1.12]	R52		'G3P[c] + NAD[c] + Pi[c] <--> BPG[c] + NADH[c]'	Glyceraldehyde 3-phosphate dehydrogenase [ec:1.2.1.12]	R52		'G3P[c] + NAD[c] + Pi[c] <--> BPG[c] + NADH[c]'	Glyceraldehyde 3-phosphate dehydrogenase [ec:1.2.1.12]	R52		'G3P[c] + NAD[c] + Pi[c] <--> BPG[c] + NADH[c]'	Glyceraldehyde 3-phosphate dehydrogenase [ec:1.2.1.12]	R52		'G3P[c] + NAD[c] + Pi[c] <--> BPG[c] + NADH[c]'	Glyceraldehyde 3-phosphate dehydrogenase [ec:1.2.1.12]
R53		'BPG[c] + ADP[c] <--> 3-PG[c] + ATP[c]'	Phosphoglycerate kinase [ec:2.7.2.3]	R53		'BPG[c] + ADP[c] <--> 3-PG[c] + ATP[c]'	Phosphoglycerate kinase [ec:2.7.2.3]	R53		'BPG[c] + ADP[c] <--> 3-PG[c] + ATP[c]'	Phosphoglycerate kinase [ec:2.7.2.3]	R53		'BPG[c] + ADP[c] <--> 3-PG[c] + ATP[c]'	Phosphoglycerate kinase [ec:2.7.2.3]	R53		'BPG[c] + ADP[c] <--> 3-PG[c] + ATP[c]'	Phosphoglycerate kinase [ec:2.7.2.3]
R54		'3-PG[c] <--> 2-PG[c]'	Phosphoglycerate mutase [ec:5.4.2.1]	R54		'3-PG[c] <--> 2-PG[c]'	Phosphoglycerate mutase [ec:5.4.2.1]	R54		'3-PG[c] <--> 2-PG[c]'	Phosphoglycerate mutase [ec:5.4.2.1]	R54		'3-PG[c] <--> 2-PG[c]'	Phosphoglycerate mutase [ec:5.4.2.1]	R54		'3-PG[c] <--> 2-PG[c]'	Phosphoglycerate mutase [ec:5.4.2.1]
R55		'2-PG[c] <--> PEP[c]'	Phosphopyruvate hydratase [ec:4.2.1.11]	R55		'2-PG[c] <--> PEP[c]'	Phosphopyruvate hydratase [ec:4.2.1.11]	R55		'2-PG[c] <--> PEP[c]'	Phosphopyruvate hydratase [ec:4.2.1.11]	R55		'2-PG[c] <--> PEP[c]'	Phosphopyruvate hydratase [ec:4.2.1.11]	R55		'2-PG[c] <--> PEP[c]'	Phosphopyruvate hydratase [ec:4.2.1.11]
R56		'PEP[c] + ADP[c] --> PYR[c] + ATP[c]'	Pyruvate kinase [ec:2.7.1.40]	R56		'PEP[c] + ADP[c] --> PYR[c] + ATP[c]'	Pyruvate kinase [ec:2.7.1.40]	R56		'PEP[c] + ADP[c] --> PYR[c] + ATP[c]'	Pyruvate kinase [ec:2.7.1.40]	R56		'PEP[c] + ADP[c] --> PYR[c] + ATP[c]'	Pyruvate kinase [ec:2.7.1.40]	R56		'PEP[c] + ADP[c] --> PYR[c] + ATP[c]'	Pyruvate kinase [ec:2.7.1.40]
R57		'PYR[c] + ATP[c] --> PEP[c] + AMP[c] + Pi[c]'	Phosphoenolpyruvate synthase [ec:2.7.9.2]	R57		'PYR[c] + ATP[c] --> PEP[c] + AMP[c] + Pi[c]'	Phosphoenolpyruvate synthase [ec:2.7.9.2]	R57		'PYR[c] + ATP[c] --> PEP[c] + AMP[c] + Pi[c]'	Phosphoenolpyruvate synthase [ec:2.7.9.2]	R57		'PYR[c] + ATP[c] --> PEP[c] + AMP[c] + Pi[c]'	Phosphoenolpyruvate synthase [ec:2.7.9.2]	R57		'PYR[c] + ATP[c] --> PEP[c] + AMP[c] + Pi[c]'	Phosphoenolpyruvate synthase [ec:2.7.9.2]
R58		'PYR[c] + NAD[c] + H-CoA[c] --> AC-CoA[c] + NADH[c] + CO2[c]'	Pyruvate dehydrogenase complex [ec:1.2.4.1&ec:2.3.1.12&ec:1.8.1.4]	R58		'PYR[c] + NAD[c] + H-CoA[c] --> AC-CoA[c] + NADH[c] + CO2[c]'	Pyruvate dehydrogenase complex [ec:1.2.4.1&ec:2.3.1.12&ec:1.8.1.4]	R58		'PYR[c] + NAD[c] + H-CoA[c] --> AC-CoA[c] + NADH[c] + CO2[c]'	Pyruvate dehydrogenase complex [ec:1.2.4.1&ec:2.3.1.12&ec:1.8.1.4]	R58		'PYR[c] + NAD[c] + H-CoA[c] --> AC-CoA[c] + NADH[c] + CO2[c]'	Pyruvate dehydrogenase complex [ec:1.2.4.1&ec:2.3.1.12&ec:1.8.1.4]	R58		'PYR[c] + NAD[c] + H-CoA[c] --> AC-CoA[c] + NADH[c] + CO2[c]'	Pyruvate dehydrogenase complex [ec:1.2.4.1&ec:2.3.1.12&ec:1.8.1.4]
R59		'PEP[c] + CO2[c] --> OXA[c] + Pi[c]'	Phosphoenolpyruvate carboxylase [ec:4.1.1.31]	R59		'PEP[c] + CO2[c] --> OXA[c] + Pi[c]'	Phosphoenolpyruvate carboxylase [ec:4.1.1.31]	R59		'PEP[c] + CO2[c] --> OXA[c] + Pi[c]'	Phosphoenolpyruvate carboxylase [ec:4.1.1.31]	R59		'PEP[c] + CO2[c] --> OXA[c] + Pi[c]'	Phosphoenolpyruvate carboxylase [ec:4.1.1.31]	R59		'PEP[c] + CO2[c] --> OXA[c] + Pi[c]'	Phosphoenolpyruvate carboxylase [ec:4.1.1.31]
R60		'PYR[c] + ATP[c] + CO2[c] <--> OXA[c] + ADP[c] + Pi[c]'	Pyruvate carboxylase [ec:6.4.1.1]	R60		'PYR[c] + ATP[c] + CO2[c] <--> OXA[c] + ADP[c] + Pi[c]'	Pyruvate carboxylase [ec:6.4.1.1]	R60		'PYR[c] + ATP[c] + CO2[c] <--> OXA[c] + ADP[c] + Pi[c]'	Pyruvate carboxylase [ec:6.4.1.1]	R60		'PYR[c] + ATP[c] + CO2[c] <--> OXA[c] + ADP[c] + Pi[c]'	Pyruvate carboxylase [ec:6.4.1.1]	R60		'PYR[c] + ATP[c] + CO2[c] <--> OXA[c] + ADP[c] + Pi[c]'	Pyruvate carboxylase [ec:6.4.1.1]
R61		'OXA[c] + ATP[c] --> PEP[c] + ADP[c] + CO2[c]'	Phosphoenolpyruvate carboxykinase [ec:4.1.1.49]	R61		'OXA[c] + ATP[c] --> PEP[c] + ADP[c] + CO2[c]'	Phosphoenolpyruvate carboxykinase [ec:4.1.1.49]	R61		'OXA[c] + ATP[c] --> PEP[c] + ADP[c] + CO2[c]'	Phosphoenolpyruvate carboxykinase [ec:4.1.1.49]	R61		'OXA[c] + ATP[c] --> PEP[c] + ADP[c] + CO2[c]'	Phosphoenolpyruvate carboxykinase [ec:4.1.1.49]	R61		'OXA[c] + ATP[c] --> PEP[c] + ADP[c] + CO2[c]'	Phosphoenolpyruvate carboxykinase [ec:4.1.1.49]
R62		'OXA[c] + AC-CoA[c] --> CIT[c] + H-CoA[c]'	Citrate synthase [ec:2.3.3.1]	R62		'OXA[c] + AC-CoA[c] --> CIT[c] + H-CoA[c]'	Citrate synthase [ec:2.3.3.1]	R62		'OXA[c] + AC-CoA[c] --> CIT[c] + H-CoA[c]'	Citrate synthase [ec:2.3.3.1]	R62		'OXA[c] + AC-CoA[c] --> CIT[c] + H-CoA[c]'	Citrate synthase [ec:2.3.3.1]	R62		'OXA[c] + AC-CoA[c] --> CIT[c] + H-CoA[c]'	Citrate synthase [ec:2.3.3.1]
R63		'CIT[c] <--> ISC[c]'	Aconitase [ec:4.2.1.3]	R63		'CIT[c] <--> ISC[c]'	Aconitase [ec:4.2.1.3]	R63		'CIT[c] <--> ISC[c]'	Aconitase [ec:4.2.1.3]	R63		'CIT[c] <--> ISC[c]'	Aconitase [ec:4.2.1.3]	R63		'CIT[c] <--> ISC[c]'	Aconitase [ec:4.2.1.3]
R64		'ISC[c] + NAD[c] --> aKG[c] + NADH[c] + CO2[c]'	Isocitrate dehydrogenase (NAD dependent) [ec:1.1.1.41]	R64		'ISC[c] + NAD[c] --> aKG[c] + NADH[c] + CO2[c]'	Isocitrate dehydrogenase (NAD dependent) [ec:1.1.1.41]	R64		'ISC[c] + NAD[c] --> aKG[c] + NADH[c] + CO2[c]'	Isocitrate dehydrogenase (NAD dependent) [ec:1.1.1.41]	R64		'ISC[c] + NAD[c] --> aKG[c] + NADH[c] + CO2[c]'	Isocitrate dehydrogenase (NAD dependent) [ec:1.1.1.41]	R64		'ISC[c] + NAD[c] --> aKG[c] + NADH[c] + CO2[c]'	Isocitrate dehydrogenase (NAD dependent) [ec:1.1.1.41]
R65		'aKG[c] + H-CoA[c] + NAD[c] --> SUC-CoA[c] + CO2[c] + NADH[c]'	α-ketoglutarate dehydrogenase [ec:1.2.4.2&2.3.1.61]	R65		'aKG[c] + H-CoA[c] + NAD[c] --> SUC-CoA[c] + CO2[c] + NADH[c]'	α-ketoglutarate dehydrogenase [ec:1.2.4.2&2.3.1.61]	R65		'aKG[c] + H-CoA[c] + NAD[c] --> SUC-CoA[c] + CO2[c] + NADH[c]'	α-ketoglutarate dehydrogenase [ec:1.2.4.2&2.3.1.61]	R65		'aKG[c] + H-CoA[c] + NAD[c] --> SUC-CoA[c] + CO2[c] + NADH[c]'	α-ketoglutarate dehydrogenase [ec:1.2.4.2&2.3.1.61]	R65		'aKG[c] + H-CoA[c] + NAD[c] --> SUC-CoA[c] + CO2[c] + NADH[c]'	α-ketoglutarate dehydrogenase [ec:1.2.4.2&2.3.1.61]
R66		'SUC-CoA[c] + ADP[c] + Pi[c] <--> SUC[c] + H-CoA[c] + ATP[c]'	Succinyl-CoA synthetase [ec:6.2.1.5]	R66		'SUC-CoA[c] + ADP[c] + Pi[c] <--> SUC[c] + H-CoA[c] + ATP[c]'	Succinyl-CoA synthetase [ec:6.2.1.5]	R66		'SUC-CoA[c] + ADP[c] + Pi[c] <--> SUC[c] + H-CoA[c] + ATP[c]'	Succinyl-CoA synthetase [ec:6.2.1.5]	R66		'SUC-CoA[c] + ADP[c] + Pi[c] <--> SUC[c] + H-CoA[c] + ATP[c]'	Succinyl-CoA synthetase [ec:6.2.1.5]	R66		'SUC-CoA[c] + ADP[c] + Pi[c] <--> SUC[c] + H-CoA[c] + ATP[c]'	Succinyl-CoA synthetase [ec:6.2.1.5]
R67		'SUC[c] + FAD[c] <--> FUM[c] + FADH2[c]'	Fumarate reductase [ec:1.3.5.4]	R67		'SUC[c] + FAD[c] <--> FUM[c] + FADH2[c]'	Fumarate reductase [ec:1.3.5.4]	R67		'SUC[c] + FAD[c] <--> FUM[c] + FADH2[c]'	Fumarate reductase [ec:1.3.5.4]	R67		'SUC[c] + FAD[c] <--> FUM[c] + FADH2[c]'	Fumarate reductase [ec:1.3.5.4]	R67		'SUC[c] + FAD[c] <--> FUM[c] + FADH2[c]'	Fumarate reductase [ec:1.3.5.4]
R68		'SUC[c] + UQ[c] --> FUM[c] + UQH2[c]'	Succinate dehydrogenase [ec:1.3.5.1]	R68		'SUC[c] + UQ[c] --> FUM[c] + UQH2[c]'	Succinate dehydrogenase [ec:1.3.5.1]	R68		'SUC[c] + UQ[c] --> FUM[c] + UQH2[c]'	Succinate dehydrogenase [ec:1.3.5.1]	R68		'SUC[c] + UQ[c] --> FUM[c] + UQH2[c]'	Succinate dehydrogenase [ec:1.3.5.1]	R68		'SUC[c] + UQ[c] --> FUM[c] + UQH2[c]'	Succinate dehydrogenase [ec:1.3.5.1]
R69		'FUM[c] <--> MAL[c]'	Fumarase [ec:4.2.1.2]	R69		'FUM[c] <--> MAL[c]'	Fumarase [ec:4.2.1.2]	R69		'FUM[c] <--> MAL[c]'	Fumarase [ec:4.2.1.2]	R69		'FUM[c] <--> MAL[c]'	Fumarase [ec:4.2.1.2]	R69		'FUM[c] <--> MAL[c]'	Fumarase [ec:4.2.1.2]
R70		'MAL[c] + NAD[c] <--> OXA[c] + NADH[c]'	Malate dehydrogenase [ec:1.1.1.37]	R70		'MAL[c] + NAD[c] <--> OXA[c] + NADH[c]'	Malate dehydrogenase [ec:1.1.1.37]	R70		'MAL[c] + NAD[c] <--> OXA[c] + NADH[c]'	Malate dehydrogenase [ec:1.1.1.37]	R70		'MAL[c] + NAD[c] <--> OXA[c] + NADH[c]'	Malate dehydrogenase [ec:1.1.1.37]	R70		'MAL[c] + NAD[c] <--> OXA[c] + NADH[c]'	Malate dehydrogenase [ec:1.1.1.37]
R71		'MAL[c] + NADP[c] --> PYR[c] + CO2[c] + NADPH[c]'	Malic enzyme (NADP dependent) [ec:1.1.1.40]	R71		'MAL[c] + NADP[c] --> PYR[c] + CO2[c] + NADPH[c]'	Malic enzyme (NADP dependent) [ec:1.1.1.40]	R71		'MAL[c] + NADP[c] --> PYR[c] + CO2[c] + NADPH[c]'	Malic enzyme (NADP dependent) [ec:1.1.1.40]	R71		'MAL[c] + NADP[c] --> PYR[c] + CO2[c] + NADPH[c]'	Malic enzyme (NADP dependent) [ec:1.1.1.40]	R71		'MAL[c] + NADP[c] --> PYR[c] + CO2[c] + NADPH[c]'	Malic enzyme (NADP dependent) [ec:1.1.1.40]
R72		'ISC[c] --> GLYOX[c] + SUC[c]'	Isocitrate lyase [ec:4.1.3.1]	R72		'ISC[c] --> GLYOX[c] + SUC[c]'	Isocitrate lyase [ec:4.1.3.1]	R72		'ISC[c] --> GLYOX[c] + SUC[c]'	Isocitrate lyase [ec:4.1.3.1]	R72		'ISC[c] --> GLYOX[c] + SUC[c]'	Isocitrate lyase [ec:4.1.3.1]	R72		'ISC[c] --> GLYOX[c] + SUC[c]'	Isocitrate lyase [ec:4.1.3.1]
R73		'GLYOX[c] + AC-CoA[c] --> MAL[c] + H-CoA[c]'	Malate synthase [ec:2.3.3.9]	R73		'GLYOX[c] + AC-CoA[c] --> MAL[c] + H-CoA[c]'	Malate synthase [ec:2.3.3.9]	R73		'GLYOX[c] + AC-CoA[c] --> MAL[c] + H-CoA[c]'	Malate synthase [ec:2.3.3.9]	R73		'GLYOX[c] + AC-CoA[c] --> MAL[c] + H-CoA[c]'	Malate synthase [ec:2.3.3.9]	R73		'GLYOX[c] + AC-CoA[c] --> MAL[c] + H-CoA[c]'	Malate synthase [ec:2.3.3.9]
R74		'AC[c] + H-CoA[c] + ATP[c] --> AC-CoA[c] + AMP[c] + 2 Pi[c]'	Acetyl-CoA synthetase [ec:6.2.1.1]	R74		'AC[c] + H-CoA[c] + ATP[c] --> AC-CoA[c] + AMP[c] + 2 Pi[c]'	Acetyl-CoA synthetase [ec:6.2.1.1]	R74		'AC[c] + H-CoA[c] + ATP[c] --> AC-CoA[c] + AMP[c] + 2 Pi[c]'	Acetyl-CoA synthetase [ec:6.2.1.1]	R74		'AC[c] + H-CoA[c] + ATP[c] --> AC-CoA[c] + AMP[c] + 2 Pi[c]'	Acetyl-CoA synthetase [ec:6.2.1.1]	R74		'AC[c] + H-CoA[c] + ATP[c] --> AC-CoA[c] + AMP[c] + 2 Pi[c]'	Acetyl-CoA synthetase [ec:6.2.1.1]
R75		'2 AC-CoA[c] <--> ACAC-CoA[c] + H-CoA[c]'	Acetoacetyl-CoA thiolase [ec:2.3.1.9]	R75		'2 AC-CoA[c] <--> ACAC-CoA[c] + H-CoA[c]'	Acetoacetyl-CoA thiolase [ec:2.3.1.9]	R75		'2 AC-CoA[c] <--> ACAC-CoA[c] + H-CoA[c]'	Acetoacetyl-CoA thiolase [ec:2.3.1.9]	R75		'2 AC-CoA[c] <--> ACAC-CoA[c] + H-CoA[c]'	Acetoacetyl-CoA thiolase [ec:2.3.1.9]	R75		'2 AC-CoA[c] <--> ACAC-CoA[c] + H-CoA[c]'	Acetoacetyl-CoA thiolase [ec:2.3.1.9]
R76		'AC-CoA[c] + SUC[c] --> AC[c] + SUC-CoA[c]'	Succinyl-CoA:acetate CoA-transferase [ec:2.8.3.18]	R76		'AC-CoA[c] + SUC[c] --> AC[c] + SUC-CoA[c]'	Succinyl-CoA:acetate CoA-transferase [ec:2.8.3.18]	R76		'AC-CoA[c] + SUC[c] --> AC[c] + SUC-CoA[c]'	Succinyl-CoA:acetate CoA-transferase [ec:2.8.3.18]	R76		'AC-CoA[c] + SUC[c] --> AC[c] + SUC-CoA[c]'	Succinyl-CoA:acetate CoA-transferase [ec:2.8.3.18]	R76		'AC-CoA[c] + SUC[c] --> AC[c] + SUC-CoA[c]'	Succinyl-CoA:acetate CoA-transferase [ec:2.8.3.18]
R77		'ACAC[c] + SUC-CoA[c] <--> ACAC-CoA[c] + SUC[c]'	3-Oxoacid CoA-transferase [ec:2.8.3.5]	R77		'ACAC[c] + SUC-CoA[c] <--> ACAC-CoA[c] + SUC[c]'	3-Oxoacid CoA-transferase [ec:2.8.3.5]	R77		'ACAC[c] + SUC-CoA[c] <--> ACAC-CoA[c] + SUC[c]'	3-Oxoacid CoA-transferase [ec:2.8.3.5]	R77		'ACAC[c] + SUC-CoA[c] <--> ACAC-CoA[c] + SUC[c]'	3-Oxoacid CoA-transferase [ec:2.8.3.5]	R77		'ACAC[c] + SUC-CoA[c] <--> ACAC-CoA[c] + SUC[c]'	3-Oxoacid CoA-transferase [ec:2.8.3.5]
R78		'PYR[c] + H-CoA[c] --> AC-CoA[c] + FOR[c]'	Pyruvate formate lyase [ec:2.3.1.54]	R78		'PYR[c] + H-CoA[c] --> AC-CoA[c] + FOR[c]'	Pyruvate formate lyase [ec:2.3.1.54]	R78		'PYR[c] + H-CoA[c] --> AC-CoA[c] + FOR[c]'	Pyruvate formate lyase [ec:2.3.1.54]	R78		'PYR[c] + H-CoA[c] --> AC-CoA[c] + FOR[c]'	Pyruvate formate lyase [ec:2.3.1.54]	R78		'PYR[c] + H-CoA[c] --> AC-CoA[c] + FOR[c]'	Pyruvate formate lyase [ec:2.3.1.54]
R79		'FOR[c] + NAD[c] --> CO2[c] + NADH[c]'	Formate dehydrogenase [ec:1.17.1.9]	R79		'FOR[c] + NAD[c] --> CO2[c] + NADH[c]'	Formate dehydrogenase [ec:1.17.1.9]	R79		'FOR[c] + NAD[c] --> CO2[c] + NADH[c]'	Formate dehydrogenase [ec:1.17.1.9]	R79		'FOR[c] + NAD[c] --> CO2[c] + NADH[c]'	Formate dehydrogenase [ec:1.17.1.9]	R79		'FOR[c] + NAD[c] --> CO2[c] + NADH[c]'	Formate dehydrogenase [ec:1.17.1.9]
R80		'H-CoA[c] + ACP[c] --> AC-CoA[c] + Pi[c]'	Phosphate acetyltransferase [ec:2.3.1.8]	R80		'H-CoA[c] + ACP[c] --> AC-CoA[c] + Pi[c]'	Phosphate acetyltransferase [ec:2.3.1.8]	R80		'H-CoA[c] + ACP[c] --> AC-CoA[c] + Pi[c]'	Phosphate acetyltransferase [ec:2.3.1.8]	R80		'H-CoA[c] + ACP[c] --> AC-CoA[c] + Pi[c]'	Phosphate acetyltransferase [ec:2.3.1.8]	R80		'H-CoA[c] + ACP[c] --> AC-CoA[c] + Pi[c]'	Phosphate acetyltransferase [ec:2.3.1.8]
R81		'ACP[c] + ADP[c] --> AC[c] + ATP[c]'	Acetate kinase [ec:2.7.2.1]	R81		'ACP[c] + ADP[c] --> AC[c] + ATP[c]'	Acetate kinase [ec:2.7.2.1]	R81		'ACP[c] + ADP[c] --> AC[c] + ATP[c]'	Acetate kinase [ec:2.7.2.1]	R81		'ACP[c] + ADP[c] --> AC[c] + ATP[c]'	Acetate kinase [ec:2.7.2.1]	R81		'ACP[c] + ADP[c] --> AC[c] + ATP[c]'	Acetate kinase [ec:2.7.2.1]
R82		'AC-CoA[c] + NADH[c] <--> ACA[c] + NAD[c] + H-CoA[c]'	Acetaldehyde dehydrogenase [ec:1.2.1.10]	R82		'AC-CoA[c] + NADH[c] <--> ACA[c] + NAD[c] + H-CoA[c]'	Acetaldehyde dehydrogenase [ec:1.2.1.10]	R82		'AC-CoA[c] + NADH[c] <--> ACA[c] + NAD[c] + H-CoA[c]'	Acetaldehyde dehydrogenase [ec:1.2.1.10]	R82		'AC-CoA[c] + NADH[c] <--> ACA[c] + NAD[c] + H-CoA[c]'	Acetaldehyde dehydrogenase [ec:1.2.1.10]	R82		'AC-CoA[c] + NADH[c] <--> ACA[c] + NAD[c] + H-CoA[c]'	Acetaldehyde dehydrogenase [ec:1.2.1.10]
R83		'ACA[c] + NAD[c] --> AC[c] + NADH[c]'	Aldehyde dehydrogenase (NAD dependent) [ec:1.2.1.3]	R83		'ACA[c] + NAD[c] --> AC[c] + NADH[c]'	Aldehyde dehydrogenase (NAD dependent) [ec:1.2.1.3]	R83		'ACA[c] + NAD[c] --> AC[c] + NADH[c]'	Aldehyde dehydrogenase (NAD dependent) [ec:1.2.1.3]	R83		'ACA[c] + NAD[c] --> AC[c] + NADH[c]'	Aldehyde dehydrogenase (NAD dependent) [ec:1.2.1.3]	R83		'ACA[c] + NAD[c] --> AC[c] + NADH[c]'	Aldehyde dehydrogenase (NAD dependent) [ec:1.2.1.3]
R84		'ACA[c] + NADH[c] --> ETOH[c] + NAD[c]'	Alcohol dehydrogenase [ec:1.1.1.1]	R84		'ACA[c] + NADH[c] --> ETOH[c] + NAD[c]'	Alcohol dehydrogenase [ec:1.1.1.1]	R84		'ACA[c] + NADH[c] --> ETOH[c] + NAD[c]'	Alcohol dehydrogenase [ec:1.1.1.1]	R84		'ACA[c] + NADH[c] --> ETOH[c] + NAD[c]'	Alcohol dehydrogenase [ec:1.1.1.1]	R84		'ACA[c] + NADH[c] --> ETOH[c] + NAD[c]'	Alcohol dehydrogenase [ec:1.1.1.1]
R85		'PYR[c] + NADH[c] --> LAC[c] + NAD[c]'	Lactate dehydrogenase [ec:1.1.1.27]	R85		'PYR[c] + NADH[c] --> LAC[c] + NAD[c]'	Lactate dehydrogenase [ec:1.1.1.27]	R85		'PYR[c] + NADH[c] --> LAC[c] + NAD[c]'	Lactate dehydrogenase [ec:1.1.1.27]	R85		'PYR[c] + NADH[c] --> LAC[c] + NAD[c]'	Lactate dehydrogenase [ec:1.1.1.27]	R85		'PYR[c] + NADH[c] --> LAC[c] + NAD[c]'	Lactate dehydrogenase [ec:1.1.1.27]
R86		'ACAC[c] --> ACETONE[c] + CO2[c]'	Acetoacetate decarboxylase [ec:4.1.1.4]	R86		'ACAC[c] --> ACETONE[c] + CO2[c]'	Acetoacetate decarboxylase [ec:4.1.1.4]	R86		'ACAC[c] --> ACETONE[c] + CO2[c]'	Acetoacetate decarboxylase [ec:4.1.1.4]	R86		'ACAC[c] --> ACETONE[c] + CO2[c]'	Acetoacetate decarboxylase [ec:4.1.1.4]	R86		'ACAC[c] --> ACETONE[c] + CO2[c]'	Acetoacetate decarboxylase [ec:4.1.1.4]
R87		'ACAC-CoA[c] + NADPH[c] <--> 3-HBut-CoA[c] + NADP[c]'	3-Hydroxyacyl-CoA dehydrogenase [ec:1.1.1.35]	R87		'ACAC-CoA[c] + NADPH[c] <--> 3-HBut-CoA[c] + NADP[c]'	3-Hydroxyacyl-CoA dehydrogenase [ec:1.1.1.35]	R87		'ACAC-CoA[c] + NADPH[c] <--> 3-HBut-CoA[c] + NADP[c]'	3-Hydroxyacyl-CoA dehydrogenase [ec:1.1.1.35]	R87		'ACAC-CoA[c] + NADPH[c] <--> 3-HBut-CoA[c] + NADP[c]'	3-Hydroxyacyl-CoA dehydrogenase [ec:1.1.1.35]	R87		'ACAC-CoA[c] + NADPH[c] <--> 3-HBut-CoA[c] + NADP[c]'	3-Hydroxyacyl-CoA dehydrogenase [ec:1.1.1.35]
R88		'3-HBut-CoA[c] --> PHB[c] + H-CoA[c]'	Poly(3-hydroxybutyrate) synthase [ec:2.3.1.-]	R88		'3-HBut-CoA[c] --> PHB[c] + H-CoA[c]'	Poly(3-hydroxybutyrate) synthase [ec:2.3.1.-]	R88		'3-HBut-CoA[c] --> PHB[c] + H-CoA[c]'	Poly(3-hydroxybutyrate) synthase [ec:2.3.1.-]	R88		'3-HBut-CoA[c] --> PHB[c] + H-CoA[c]'	Poly(3-hydroxybutyrate) synthase [ec:2.3.1.-]	R88		'3-HBut-CoA[c] --> PHB[c] + H-CoA[c]'	Poly(3-hydroxybutyrate) synthase [ec:2.3.1.-]
R89		'PHB[c] + NAD[c] --> ACAC[c] + NADH[c]'	PHA depolymerase [ec:3.1.1.75]	R89		'PHB[c] + NAD[c] --> ACAC[c] + NADH[c]'	PHA depolymerase [ec:3.1.1.75]	R89		'PHB[c] + NAD[c] --> ACAC[c] + NADH[c]'	PHA depolymerase [ec:3.1.1.75]	R89		'PHB[c] + NAD[c] --> ACAC[c] + NADH[c]'	PHA depolymerase [ec:3.1.1.75]	R89		'PHB[c] + NAD[c] --> ACAC[c] + NADH[c]'	PHA depolymerase [ec:3.1.1.75]
R90		'aKG[c] + NADPH[c] + NH3[c] <--> GLU[c] + NADP[c]'	Glutamate dehydrogenase [ec:1.4.1.2]	R90		'aKG[c] + NADPH[c] + NH3[c] <--> GLU[c] + NADP[c]'	Glutamate dehydrogenase [ec:1.4.1.2]	R90		'aKG[c] + NADPH[c] + NH3[c] <--> GLU[c] + NADP[c]'	Glutamate dehydrogenase [ec:1.4.1.2]	R90		'aKG[c] + NADPH[c] + NH3[c] <--> GLU[c] + NADP[c]'	Glutamate dehydrogenase [ec:1.4.1.2]	R90		'aKG[c] + NADPH[c] + NH3[c] <--> GLU[c] + NADP[c]'	Glutamate dehydrogenase [ec:1.4.1.2]
R91		'GLU[c] + NH3[c] + ATP[c] <--> GLN[c] + ADP[c] + Pi[c]'	Glutamine synthase [ec:6.3.1.2]	R91		'GLU[c] + NH3[c] + ATP[c] <--> GLN[c] + ADP[c] + Pi[c]'	Glutamine synthase [ec:6.3.1.2]	R91		'GLU[c] + NH3[c] + ATP[c] <--> GLN[c] + ADP[c] + Pi[c]'	Glutamine synthase [ec:6.3.1.2]	R91		'GLU[c] + NH3[c] + ATP[c] <--> GLN[c] + ADP[c] + Pi[c]'	Glutamine synthase [ec:6.3.1.2]	R91		'GLU[c] + NH3[c] + ATP[c] <--> GLN[c] + ADP[c] + Pi[c]'	Glutamine synthase [ec:6.3.1.2]
R92		'0.021 G6P[c] + 0.007 F6P[c] + 0.09 R5P[c] + 0.036 E4P[c] + 0.013 G3P[c] + 0.15 3-PG[c] + 0.052 PEP[c] + 0.283 PYR[c] + 0.374 AC-CoA[c] + 0.179 OXA[c] + 0.832 GLU[c] + 0.025 GLN[c] + 4.11 ATP[c] + 0.826 NADPH[c] + 0.312 NAD[c] --> BIOMASS[c] + 0.751 aKG[c] + 0.261 CO2[c] + 0.374 H-CoA[c] + 4.11 ADP[c] + 4.479 Pi[c] + 0.826 NADP[c] + 0.312 NADH[c]'	Biomass formation	R92		'0.021 G6P[c] + 0.007 F6P[c] + 0.09 R5P[c] + 0.036 E4P[c] + 0.013 G3P[c] + 0.15 3-PG[c] + 0.052 PEP[c] + 0.283 PYR[c] + 0.374 AC-CoA[c] + 0.179 OXA[c] + 0.832 GLU[c] + 0.025 GLN[c] + 4.11 ATP[c] + 0.826 NADPH[c] + 0.312 NAD[c] --> BIOMASS[c] + 0.751 aKG[c] + 0.261 CO2[c] + 0.374 H-CoA[c] + 4.11 ADP[c] + 4.479 Pi[c] + 0.826 NADP[c] + 0.312 NADH[c]'	Biomass formation	R92		'0.021 G6P[c] + 0.007 F6P[c] + 0.09 R5P[c] + 0.036 E4P[c] + 0.013 G3P[c] + 0.15 3-PG[c] + 0.052 PEP[c] + 0.283 PYR[c] + 0.374 AC-CoA[c] + 0.179 OXA[c] + 0.832 GLU[c] + 0.025 GLN[c] + 4.11 ATP[c] + 0.826 NADPH[c] + 0.312 NAD[c] --> BIOMASS[c] + 0.751 aKG[c] + 0.261 CO2[c] + 0.374 H-CoA[c] + 4.11 ADP[c] + 4.479 Pi[c] + 0.826 NADP[c] + 0.312 NADH[c]'	Biomass formation	R92		'0.021 G6P[c] + 0.007 F6P[c] + 0.09 R5P[c] + 0.036 E4P[c] + 0.013 G3P[c] + 0.15 3-PG[c] + 0.052 PEP[c] + 0.283 PYR[c] + 0.374 AC-CoA[c] + 0.179 OXA[c] + 0.832 GLU[c] + 0.025 GLN[c] + 4.11 ATP[c] + 0.826 NADPH[c] + 0.312 NAD[c] --> BIOMASS[c] + 0.751 aKG[c] + 0.261 CO2[c] + 0.374 H-CoA[c] + 4.11 ADP[c] + 4.479 Pi[c] + 0.826 NADP[c] + 0.312 NADH[c]'	Biomass formation	R92		'0.021 G6P[c] + 0.007 F6P[c] + 0.09 R5P[c] + 0.036 E4P[c] + 0.013 G3P[c] + 0.15 3-PG[c] + 0.052 PEP[c] + 0.283 PYR[c] + 0.374 AC-CoA[c] + 0.179 OXA[c] + 0.832 GLU[c] + 0.025 GLN[c] + 4.11 ATP[c] + 0.826 NADPH[c] + 0.312 NAD[c] --> BIOMASS[c] + 0.751 aKG[c] + 0.261 CO2[c] + 0.374 H-CoA[c] + 4.11 ADP[c] + 4.479 Pi[c] + 0.826 NADP[c] + 0.312 NADH[c]'	Biomass formation
R93		'NADH[c] + FAD[c] --> NAD[c] + FADH2[c]'	Flavin reductase (NAD dependent) [ec:1.5.1.36]	R93		'NADH[c] + FAD[c] --> NAD[c] + FADH2[c]'	Flavin reductase (NAD dependent) [ec:1.5.1.36]	R93		'NADH[c] + FAD[c] --> NAD[c] + FADH2[c]'	Flavin reductase (NAD dependent) [ec:1.5.1.36]	R93		'NADH[c] + FAD[c] --> NAD[c] + FADH2[c]'	Flavin reductase (NAD dependent) [ec:1.5.1.36]	R93		'NADH[c] + FAD[c] --> NAD[c] + FADH2[c]'	Flavin reductase (NAD dependent) [ec:1.5.1.36]
R94		'NADPH[c] + NAD[c] --> NADP[c] + NADH[c]'	NAD(P) transhydrogenase [ec:1.6.1.3]	R94		'NADPH[c] + NAD[c] --> NADP[c] + NADH[c]'	NAD(P) transhydrogenase [ec:1.6.1.3]	R94		'NADPH[c] + NAD[c] --> NADP[c] + NADH[c]'	NAD(P) transhydrogenase [ec:1.6.1.3]	R94		'NADPH[c] + NAD[c] --> NADP[c] + NADH[c]'	NAD(P) transhydrogenase [ec:1.6.1.3]	R94		'NADPH[c] + NAD[c] --> NADP[c] + NADH[c]'	NAD(P) transhydrogenase [ec:1.6.1.3]
R95		'NADH[c] + NADP[c] + H[e] --> NAD[c] + NADPH[c] + H[c]'	NAD(P) transhydrogenase (Re/Si-specific) [ec:1.6.1.2]	R95		'NADH[c] + NADP[c] + H[e] --> NAD[c] + NADPH[c] + H[c]'	NAD(P) transhydrogenase (Re/Si-specific) [ec:1.6.1.2]	R95		'NADH[c] + NADP[c] + H[e] --> NAD[c] + NADPH[c] + H[c]'	NAD(P) transhydrogenase (Re/Si-specific) [ec:1.6.1.2]	R95		'NADH[c] + NADP[c] + H[e] --> NAD[c] + NADPH[c] + H[c]'	NAD(P) transhydrogenase (Re/Si-specific) [ec:1.6.1.2]	R95		'NADH[c] + NADP[c] + H[e] --> NAD[c] + NADPH[c] + H[c]'	NAD(P) transhydrogenase (Re/Si-specific) [ec:1.6.1.2]
R96		'H2[c] + NAD[c] --> NADH[c]'	Hydrogen dehydrogenase [ec:1.12.1.2]	R96		'H2[c] + NAD[c] --> NADH[c]'	Hydrogen dehydrogenase [ec:1.12.1.2]	R96		'H2[c] + NAD[c] --> NADH[c]'	Hydrogen dehydrogenase [ec:1.12.1.2]	R96		'H2[c] + NAD[c] --> NADH[c]'	Hydrogen dehydrogenase [ec:1.12.1.2]	R96		'H2[c] + NAD[c] --> NADH[c]'	Hydrogen dehydrogenase [ec:1.12.1.2]
R97		'UQ[c] + H2[c] --> UQH2[c]'	Hydrogen dehydrogenase [ec:1.12.99.6]	R97		'UQ[c] + H2[c] --> UQH2[c]'	Hydrogen dehydrogenase [ec:1.12.99.6]	R97		'UQ[c] + H2[c] --> UQH2[c]'	Hydrogen dehydrogenase [ec:1.12.99.6]	R97		'UQ[c] + H2[c] --> UQH2[c]'	Hydrogen dehydrogenase [ec:1.12.99.6]	R97		'UQ[c] + H2[c] --> UQH2[c]'	Hydrogen dehydrogenase [ec:1.12.99.6]
R98		'NADH[c] + UQ[c] --> NAD[c] + UQH2[c]'	NADH-quinone oxidoreductase [ec:1.6.5.9]	R98		'NADH[c] + UQ[c] --> NAD[c] + UQH2[c]'	NADH-quinone oxidoreductase [ec:1.6.5.9]	R98		'NADH[c] + UQ[c] --> NAD[c] + UQH2[c]'	NADH-quinone oxidoreductase [ec:1.6.5.9]	R98		'NADH[c] + UQ[c] --> NAD[c] + UQH2[c]'	NADH-quinone oxidoreductase [ec:1.6.5.9]	R98		'NADH[c] + UQ[c] --> NAD[c] + UQH2[c]'	NADH-quinone oxidoreductase [ec:1.6.5.9]
R99		'NADH[c] + UQ[c] + 4 H[c] --> NAD[c] + UQH2[c] + 4 H[e]'	NADH-quinone oxidoreductase [ec:7.1.1.2]	R99		'NADH[c] + UQ[c] + 4 H[c] --> NAD[c] + UQH2[c] + 4 H[e]'	NADH-quinone oxidoreductase [ec:7.1.1.2]	R99		'NADH[c] + UQ[c] + 4 H[c] --> NAD[c] + UQH2[c] + 4 H[e]'	NADH-quinone oxidoreductase [ec:7.1.1.2]	R99		'NADH[c] + UQ[c] + 4 H[c] --> NAD[c] + UQH2[c] + 4 H[e]'	NADH-quinone oxidoreductase [ec:7.1.1.2]	R99		'NADH[c] + UQ[c] + 4 H[c] --> NAD[c] + UQH2[c] + 4 H[e]'	NADH-quinone oxidoreductase [ec:7.1.1.2]
R100		'UQH2[c] + 4 H[c] + 0.5 O2[c] --> UQ[c] + 4 H[e]'	Cytochrome bd oxidase [ec:7.1.1.7]	R100		'UQH2[c] + 4 H[c] + 0.5 O2[c] --> UQ[c] + 4 H[e]'	Cytochrome bd oxidase [ec:7.1.1.7]	R100		'UQH2[c] + 4 H[c] + 0.5 O2[c] --> UQ[c] + 4 H[e]'	Cytochrome bd oxidase [ec:7.1.1.7]	R100		'UQH2[c] + 4 H[c] + 0.5 O2[c] --> UQ[c] + 4 H[e]'	Cytochrome bd oxidase [ec:7.1.1.7]	R100		'UQH2[c] + 4 H[c] + 0.5 O2[c] --> UQ[c] + 4 H[e]'	Cytochrome bd oxidase [ec:7.1.1.7]
R101		'UQH2[c] + 2 H[c] + 0.5 O2[c] --> UQ[c] + 2 H[e]'	Cytochrome bo oxidase [ec:7.1.1.3]	R101		'UQH2[c] + 2 H[c] + 0.5 O2[c] --> UQ[c] + 2 H[e]'	Cytochrome bo oxidase [ec:7.1.1.3]	R101		'UQH2[c] + 2 H[c] + 0.5 O2[c] --> UQ[c] + 2 H[e]'	Cytochrome bo oxidase [ec:7.1.1.3]	R101		'UQH2[c] + 2 H[c] + 0.5 O2[c] --> UQ[c] + 2 H[e]'	Cytochrome bo oxidase [ec:7.1.1.3]	R101		'UQH2[c] + 2 H[c] + 0.5 O2[c] --> UQ[c] + 2 H[e]'	Cytochrome bo oxidase [ec:7.1.1.3]
R102		'ADP[c] + 4 H[e] + Pi[c] --> ATP[c] + 4 H[c]'	ATP synthase [ec:3.6.3.14]	R102		'ADP[c] + 4 H[e] + Pi[c] --> ATP[c] + 4 H[c]'	ATP synthase [ec:3.6.3.14]	R102		'ADP[c] + 4 H[e] + Pi[c] --> ATP[c] + 4 H[c]'	ATP synthase [ec:3.6.3.14]	R102		'ADP[c] + 4 H[e] + Pi[c] --> ATP[c] + 4 H[c]'	ATP synthase [ec:3.6.3.14]	R102		'ADP[c] + 4 H[e] + Pi[c] --> ATP[c] + 4 H[c]'	ATP synthase [ec:3.6.3.14]
R103		'ADP[c] + 3 H[e] + Pi[c] <-- ATP[c] + 3 H[c]'	reverse ATP synthase (proton pump) [ec:3.6.3.14]	R103		'ADP[c] + 3 H[e] + Pi[c] <-- ATP[c] + 3 H[c]'	reverse ATP synthase (proton pump) [ec:3.6.3.14]	R103		'ADP[c] + 3 H[e] + Pi[c] <-- ATP[c] + 3 H[c]'	reverse ATP synthase (proton pump) [ec:3.6.3.14]	R103		'ADP[c] + 3 H[e] + Pi[c] <-- ATP[c] + 3 H[c]'	reverse ATP synthase (proton pump) [ec:3.6.3.14]	R103		'ADP[c] + 3 H[e] + Pi[c] <-- ATP[c] + 3 H[c]'	reverse ATP synthase (proton pump) [ec:3.6.3.14]
R104		'AMP[c] + ATP[c] --> 2 ADP[c]'	Adenylate kinase [ec:2.7.4.3]	R104		'AMP[c] + ATP[c] --> 2 ADP[c]'	Adenylate kinase [ec:2.7.4.3]	R104		'AMP[c] + ATP[c] --> 2 ADP[c]'	Adenylate kinase [ec:2.7.4.3]	R104		'AMP[c] + ATP[c] --> 2 ADP[c]'	Adenylate kinase [ec:2.7.4.3]	R104		'AMP[c] + ATP[c] --> 2 ADP[c]'	Adenylate kinase [ec:2.7.4.3]
R105		'AC-CoA[c] + CO2[c] + ATP[c] --> MAL-CoA[c] + ADP[c] + Pi[c]'	Acetyl-CoA carboxylase [ec:6.4.1.2]	R105		'AC-CoA[c] + CO2[c] + ATP[c] --> MAL-CoA[c] + ADP[c] + Pi[c]'	Acetyl-CoA carboxylase [ec:6.4.1.2]	R105		'AC-CoA[c] + CO2[c] + ATP[c] --> MAL-CoA[c] + ADP[c] + Pi[c]'	Acetyl-CoA carboxylase [ec:6.4.1.2]	R105		'AC-CoA[c] + CO2[c] + ATP[c] --> MAL-CoA[c] + ADP[c] + Pi[c]'	Acetyl-CoA carboxylase [ec:6.4.1.2]	R105		'AC-CoA[c] + CO2[c] + ATP[c] --> MAL-CoA[c] + ADP[c] + Pi[c]'	Acetyl-CoA carboxylase [ec:6.4.1.2]
R106		'AC-CoA[c] + H-ACP[c] <--> H-CoA[c] + AC-ACP[c]'	Acetyl CoA:ACP transacylase [ec:2.3.1.38]	R106		'AC-CoA[c] + H-ACP[c] <--> H-CoA[c] + AC-ACP[c]'	Acetyl CoA:ACP transacylase [ec:2.3.1.38]	R106		'AC-CoA[c] + H-ACP[c] <--> H-CoA[c] + AC-ACP[c]'	Acetyl CoA:ACP transacylase [ec:2.3.1.38]	R106		'AC-CoA[c] + H-ACP[c] <--> H-CoA[c] + AC-ACP[c]'	Acetyl CoA:ACP transacylase [ec:2.3.1.38]	R106		'AC-CoA[c] + H-ACP[c] <--> H-CoA[c] + AC-ACP[c]'	Acetyl CoA:ACP transacylase [ec:2.3.1.38]
R107		'MAL-CoA[c] + H-ACP[c] <--> H-CoA[c] + MAL-ACP[c]'	Malonyl CoA:ACP transacylase [ec:2.3.1.39]	R107		'MAL-CoA[c] + H-ACP[c] <--> H-CoA[c] + MAL-ACP[c]'	Malonyl CoA:ACP transacylase [ec:2.3.1.39]	R107		'MAL-CoA[c] + H-ACP[c] <--> H-CoA[c] + MAL-ACP[c]'	Malonyl CoA:ACP transacylase [ec:2.3.1.39]	R107		'MAL-CoA[c] + H-ACP[c] <--> H-CoA[c] + MAL-ACP[c]'	Malonyl CoA:ACP transacylase [ec:2.3.1.39]	R107		'MAL-CoA[c] + H-ACP[c] <--> H-CoA[c] + MAL-ACP[c]'	Malonyl CoA:ACP transacylase [ec:2.3.1.39]
R108		'AC-ACP[c] + MAL-ACP[c] --> C4_3-Oxoacyl-ACP[c] + CO2[c] + H-ACP[c]'	3-Ketoacyl-ACP synthetase [ec:2.3.1.41]	R108		'AC-ACP[c] + MAL-ACP[c] --> C4_3-Oxoacyl-ACP[c] + CO2[c] + H-ACP[c]'	3-Ketoacyl-ACP synthetase [ec:2.3.1.41]	R108		'AC-ACP[c] + MAL-ACP[c] --> C4_3-Oxoacyl-ACP[c] + CO2[c] + H-ACP[c]'	3-Ketoacyl-ACP synthetase [ec:2.3.1.41]	R108		'AC-ACP[c] + MAL-ACP[c] --> C4_3-Oxoacyl-ACP[c] + CO2[c] + H-ACP[c]'	3-Ketoacyl-ACP synthetase [ec:2.3.1.41]	R108		'AC-ACP[c] + MAL-ACP[c] --> C4_3-Oxoacyl-ACP[c] + CO2[c] + H-ACP[c]'	3-Ketoacyl-ACP synthetase [ec:2.3.1.41]
R109		'C4_3-Oxoacyl-ACP[c] + NADPH[c] --> C4_3-Hydroxyacyl-ACP[c] + NADP[c]'	3-Ketoacyl-ACP reductase [ec:1.1.1.100]	R109		'C4_3-Oxoacyl-ACP[c] + NADPH[c] --> C4_3-Hydroxyacyl-ACP[c] + NADP[c]'	3-Ketoacyl-ACP reductase [ec:1.1.1.100]	R109		'C4_3-Oxoacyl-ACP[c] + NADPH[c] --> C4_3-Hydroxyacyl-ACP[c] + NADP[c]'	3-Ketoacyl-ACP reductase [ec:1.1.1.100]	R109		'C4_3-Oxoacyl-ACP[c] + NADPH[c] --> C4_3-Hydroxyacyl-ACP[c] + NADP[c]'	3-Ketoacyl-ACP reductase [ec:1.1.1.100]	R109		'C4_3-Oxoacyl-ACP[c] + NADPH[c] --> C4_3-Hydroxyacyl-ACP[c] + NADP[c]'	3-Ketoacyl-ACP reductase [ec:1.1.1.100]
R110		'C4_3-Hydroxyacyl-ACP[c] --> C4_trans-2,3-Dehydroacyl-ACP[c]'	3-Hydroxyacyl-ACP dehydrase [ec:4.2.1.59]	R110		'C4_3-Hydroxyacyl-ACP[c] --> C4_trans-2,3-Dehydroacyl-ACP[c]'	3-Hydroxyacyl-ACP dehydrase [ec:4.2.1.59]	R110		'C4_3-Hydroxyacyl-ACP[c] --> C4_trans-2,3-Dehydroacyl-ACP[c]'	3-Hydroxyacyl-ACP dehydrase [ec:4.2.1.59]	R110		'C4_3-Hydroxyacyl-ACP[c] --> C4_trans-2,3-Dehydroacyl-ACP[c]'	3-Hydroxyacyl-ACP dehydrase [ec:4.2.1.59]	R110		'C4_3-Hydroxyacyl-ACP[c] --> C4_trans-2,3-Dehydroacyl-ACP[c]'	3-Hydroxyacyl-ACP dehydrase [ec:4.2.1.59]
R111		'C4_trans-2,3-Dehydroacyl-ACP[c] + NADH[c] --> C4_Acyl-ACP[c] + NAD[c]'	Enoyl-ACP reductase [ec:1.3.1.9]	R111		'C4_trans-2,3-Dehydroacyl-ACP[c] + NADH[c] --> C4_Acyl-ACP[c] + NAD[c]'	Enoyl-ACP reductase [ec:1.3.1.9]	R111		'C4_trans-2,3-Dehydroacyl-ACP[c] + NADH[c] --> C4_Acyl-ACP[c] + NAD[c]'	Enoyl-ACP reductase [ec:1.3.1.9]	R111		'C4_trans-2,3-Dehydroacyl-ACP[c] + NADH[c] --> C4_Acyl-ACP[c] + NAD[c]'	Enoyl-ACP reductase [ec:1.3.1.9]	R111		'C4_trans-2,3-Dehydroacyl-ACP[c] + NADH[c] --> C4_Acyl-ACP[c] + NAD[c]'	Enoyl-ACP reductase [ec:1.3.1.9]
R112		'C4_Acyl-ACP[c] + H-CoA[c] --> Butanoyl-CoA[c] + H-ACP[c]'	Acetyl-CoA:ACP transacylase [ec:2.3.1.38]	R112		'C4_Acyl-ACP[c] + H-CoA[c] --> Butanoyl-CoA[c] + H-ACP[c]'	Acetyl-CoA:ACP transacylase [ec:2.3.1.38]	R112		'C4_Acyl-ACP[c] + H-CoA[c] --> Butanoyl-CoA[c] + H-ACP[c]'	Acetyl-CoA:ACP transacylase [ec:2.3.1.38]	R112		'C4_Acyl-ACP[c] + H-CoA[c] --> Butanoyl-CoA[c] + H-ACP[c]'	Acetyl-CoA:ACP transacylase [ec:2.3.1.38]	R112		'C4_Acyl-ACP[c] + H-CoA[c] --> Butanoyl-CoA[c] + H-ACP[c]'	Acetyl-CoA:ACP transacylase [ec:2.3.1.38]
R113		'AC-CoA[c] + Butanoyl-CoA[c] --> 3-Oxohexanoyl-CoA[c] + H-CoA[c]'	Acetyl-CoA acyltransferase [ec:2.3.1.16]	R113		'AC-CoA[c] + Butanoyl-CoA[c] --> 3-Oxohexanoyl-CoA[c] + H-CoA[c]'	Acetyl-CoA acyltransferase [ec:2.3.1.16]	R113		'AC-CoA[c] + Butanoyl-CoA[c] --> 3-Oxohexanoyl-CoA[c] + H-CoA[c]'	Acetyl-CoA acyltransferase [ec:2.3.1.16]	R113		'AC-CoA[c] + Butanoyl-CoA[c] --> 3-Oxohexanoyl-CoA[c] + H-CoA[c]'	Acetyl-CoA acyltransferase [ec:2.3.1.16]	R113		'AC-CoA[c] + Butanoyl-CoA[c] --> 3-Oxohexanoyl-CoA[c] + H-CoA[c]'	Acetyl-CoA acyltransferase [ec:2.3.1.16]
R114		'3-Oxohexanoyl-CoA[c] + NADH[c] --> 3-Hydroxyhexanoyl-CoA[c] + NAD[c]'	3-Hydroxy-acyl-CoA dehydrogenase [ec:1.1.1.35]	R114		'3-Oxohexanoyl-CoA[c] + NADH[c] --> 3-Hydroxyhexanoyl-CoA[c] + NAD[c]'	3-Hydroxy-acyl-CoA dehydrogenase [ec:1.1.1.35]	R114		'3-Oxohexanoyl-CoA[c] + NADH[c] --> 3-Hydroxyhexanoyl-CoA[c] + NAD[c]'	3-Hydroxy-acyl-CoA dehydrogenase [ec:1.1.1.35]	R114		'3-Oxohexanoyl-CoA[c] + NADH[c] --> 3-Hydroxyhexanoyl-CoA[c] + NAD[c]'	3-Hydroxy-acyl-CoA dehydrogenase [ec:1.1.1.35]	R114		'3-Oxohexanoyl-CoA[c] + NADH[c] --> 3-Hydroxyhexanoyl-CoA[c] + NAD[c]'	3-Hydroxy-acyl-CoA dehydrogenase [ec:1.1.1.35]
R115		'3-Hydroxyhexanoyl-CoA[c] --> P-3HC[c] + H-CoA[c]'	Poly(3-hydroxyalkanoate) synthase [ec:2.3.1.-]	R115		'3-Hydroxyhexanoyl-CoA[c] --> P-3HC[c] + H-CoA[c]'	Poly(3-hydroxyalkanoate) synthase [ec:2.3.1.-]	R115		'3-Hydroxyhexanoyl-CoA[c] --> P-3HC[c] + H-CoA[c]'	Poly(3-hydroxyalkanoate) synthase [ec:2.3.1.-]	R115		'3-Hydroxyhexanoyl-CoA[c] --> P-3HC[c] + H-CoA[c]'	Poly(3-hydroxyalkanoate) synthase [ec:2.3.1.-]	R115		'3-Hydroxyhexanoyl-CoA[c] --> P-3HC[c] + H-CoA[c]'	Poly(3-hydroxyalkanoate) synthase [ec:2.3.1.-]
	};				};				};				};				};
	mnet = CalculateFluxModes(ReactionFormulas,CreateFluxModeOpts('parse-only',true));				mnet = CalculateFluxModes(ReactionFormulas,CreateFluxModeOpts('parse-only',true));				mnet = CalculateFluxModes(ReactionFormulas,CreateFluxModeOpts('parse-only',true));				mnet = CalculateFluxModes(ReactionFormulas,CreateFluxModeOpts('parse-only',true));				mnet = CalculateFluxModes(ReactionFormulas,CreateFluxModeOpts('parse-only',true));

## Sheet: P6HC
	C. necator on Fructose + CO2				C. necator on Glycerol + CO2				C. necator on Acetate + CO2				C. necator on Formate + CO2				C. necator on CO2 + H2
RxN		Equation	Function / Enzyme	RxN		Equation	Function / Enzyme	RxN		Equation	Function / Enzyme	RxN		Equation	Function / Enzyme	RxN		Equation	Function / Enzyme
R1	ReactionFormulas = {	'--> CO2[e]'	Carbondioxide in	R1	ReactionFormulas = {	'--> CO2[e]'	Carbondioxide in	R1	ReactionFormulas = {	'--> CO2[e]'	Carbondioxide in	R1	ReactionFormulas = {	'--> CO2[e]'	Carbondioxide in	R1	ReactionFormulas = {	'--> CO2[e]'	Carbondioxide in
R2		'--> FRC[e]'	Fructose in	R2		'--> GLY[e]'	Fructose in	R2		'--> AC[e]'	Fructose in	R2		'--> FOR[e]'	Fructose in	R2		'--> H2[e]'	Hydrogen in
R3		'--> NH3[e]'	Ammonia in	R3		'--> NH3[e]'	Ammonia in	R3		'--> NH3[e]'	Ammonia in	R3		'--> NH3[e]'	Ammonia in	R3		'--> NH3[e]'	Ammonia in
R4		'--> O2[e]'	Oxygen in	R4		'--> O2[e]'	Oxygen in	R4		'--> O2[e]'	Oxygen in	R4		'--> O2[e]'	Oxygen in	R4		'--> O2[e]'	Oxygen in
R5		'CO2[e] -->'	Carbondioxide out	R5		'CO2[e] -->'	Carbondioxide out	R5		'CO2[e] -->'	Carbondioxide out	R5		'CO2[e] -->'	Carbondioxide out	R5		'CO2[e] -->'	Carbondioxide out
R6		'FOR[e] -->'	Formate out	R6		'FOR[e] -->'	Formate out	R6		'FOR[e] -->'	Formate out	R6		'FOR[e] -->'	Formate out	R6		'FOR[e] -->'	Formate out
R7		'AC[e] -->'	Acetate out	R7		'AC[e] -->'	Acetate out	R7		'AC[e] -->'	Acetate out	R7		'AC[e] -->'	Acetate out	R7		'AC[e] -->'	Acetate out
R8		'ETOH[e] -->'	Ethanol out	R8		'ETOH[e] -->'	Ethanol out	R8		'ETOH[e] -->'	Ethanol out	R8		'ETOH[e] -->'	Ethanol out	R8		'ETOH[e] -->'	Ethanol out
R9		'LAC[e] -->'	Lactate out	R9		'LAC[e] -->'	Lactate out	R9		'LAC[e] -->'	Lactate out	R9		'LAC[e] -->'	Lactate out	R9		'LAC[e] -->'	Lactate out
R10		'ACETONE[e] -->'	Acetone out	R10		'ACETONE[e] -->'	Acetone out	R10		'ACETONE[e] -->'	Acetone out	R10		'ACETONE[e] -->'	Acetone out	R10		'ACETONE[e] -->'	Acetone out
R11		'SUC[e] -->'	Succinate out	R11		'SUC[e] -->'	Succinate out	R11		'SUC[e] -->'	Succinate out	R11		'SUC[e] -->'	Succinate out	R11		'SUC[e] -->'	Succinate out
R12		'PHB[e] -->'	Polyhydroxybutyrate out	R12		'PHB[e] -->'	Polyhydroxybutyrate out	R12		'PHB[e] -->'	Polyhydroxybutyrate out	R12		'PHB[e] -->'	Polyhydroxybutyrate out	R12		'PHB[e] -->'	Polyhydroxybutyrate out
R13		'BIOMASS[e] -->'	Biomass out	R13		'BIOMASS[e] -->'	Biomass out	R13		'BIOMASS[e] -->'	Biomass out	R13		'BIOMASS[e] -->'	Biomass out	R13		'BIOMASS[e] -->'	Biomass out
R14		'PRODUCT[e] -->'	Product out	R14		'PRODUCT[e] -->'	Product out	R14		'PRODUCT[e] -->'	Product out	R14		'PRODUCT[e] -->'	Product out	R14		'PRODUCT[e] -->'	Product out
R15		'FOR[c] + H[c] + 0.3 ATP[c] --> FOR[e] + H[e] + 0.3 ADP[c] + 0.3 Pi[c]'	Formate export by ABC transporter	R15		'FOR[c] + H[c] + 0.3 ATP[c] --> FOR[e] + H[e] + 0.3 ADP[c] + 0.3 Pi[c]'	Formate export by ABC transporter	R15		'FOR[c] + H[c] + 0.3 ATP[c] --> FOR[e] + H[e] + 0.3 ADP[c] + 0.3 Pi[c]'	Formate export by ABC transporter	R15		'FOR[c] + H[c] <-- FOR[e] + H[e]'	Formate export by ABC transporter	R15		'FOR[c] + H[c] + 0.3 ATP[c] --> FOR[e] + H[e] + 0.3 ADP[c] + 0.3 Pi[c]'	Formate export by ABC transporter
R16		'AC[c] + H[c] + 0.3 ATP[c] --> AC[e] + H[e] + 0.3 ADP[c] + 0.3 Pi[c]'	Acetate export by ABC transporter	R16		'AC[c] + H[c] + 0.3 ATP[c] --> AC[e] + H[e] + 0.3 ADP[c] + 0.3 Pi[c]'	Acetate export by ABC transporter	R16		'AC[c] + H[c] <-- AC[e] + H[e]'	Acetate export by ABC transporter	R16		'AC[c] + H[c] + 0.3 ATP[c] --> AC[e] + H[e] + 0.3 ADP[c] + 0.3 Pi[c]'	Acetate export by ABC transporter	R16		'AC[c] + H[c] + 0.3 ATP[c] --> AC[e] + H[e] + 0.3 ADP[c] + 0.3 Pi[c]'	Acetate export by ABC transporter
R17		'ETOH[c] --> ETOH[e]'	Ethanol export by diffusion	R17		'ETOH[c] --> ETOH[e]'	Ethanol export by diffusion	R17		'ETOH[c] --> ETOH[e]'	Ethanol export by diffusion	R17		'ETOH[c] --> ETOH[e]'	Ethanol export by diffusion	R17		'ETOH[c] --> ETOH[e]'	Ethanol export by diffusion
R18		'LAC[c] + H[c] + 0.3 ATP[c] --> LAC[e] + H[e] + 0.3 ADP[c] + 0.3 Pi[c]'	Lactate export by ABC transporter	R18		'LAC[c] + H[c] + 0.3 ATP[c] --> LAC[e] + H[e] + 0.3 ADP[c] + 0.3 Pi[c]'	Lactate export by ABC transporter	R18		'LAC[c] + H[c] + 0.3 ATP[c] --> LAC[e] + H[e] + 0.3 ADP[c] + 0.3 Pi[c]'	Lactate export by ABC transporter	R18		'LAC[c] + H[c] + 0.3 ATP[c] --> LAC[e] + H[e] + 0.3 ADP[c] + 0.3 Pi[c]'	Lactate export by ABC transporter	R18		'LAC[c] + H[c] + 0.3 ATP[c] --> LAC[e] + H[e] + 0.3 ADP[c] + 0.3 Pi[c]'	Lactate export by ABC transporter
R19		'ACETONE[c] --> ACETONE[e]'	Acetone export by diffusion	R19		'ACETONE[c] --> ACETONE[e]'	Acetone export by diffusion	R19		'ACETONE[c] --> ACETONE[e]'	Acetone export by diffusion	R19		'ACETONE[c] --> ACETONE[e]'	Acetone export by diffusion	R19		'ACETONE[c] --> ACETONE[e]'	Acetone export by diffusion
R20		'SUC[c] + 2 H[c] + 0.6 ATP[c] --> SUC[e] + 2 H[e] + 0.6 ADP[c] + 0.6 Pi[c]'	Succinate export by ABC transporter	R20		'SUC[c] + 2 H[c] + 0.6 ATP[c] --> SUC[e] + 2 H[e] + 0.6 ADP[c] + 0.6 Pi[c]'	Succinate export by ABC transporter	R20		'SUC[c] + 2 H[c] + 0.6 ATP[c] --> SUC[e] + 2 H[e] + 0.6 ADP[c] + 0.6 Pi[c]'	Succinate export by ABC transporter	R20		'SUC[c] + 2 H[c] + 0.6 ATP[c] --> SUC[e] + 2 H[e] + 0.6 ADP[c] + 0.6 Pi[c]'	Succinate export by ABC transporter	R20		'SUC[c] + 2 H[c] + 0.6 ATP[c] --> SUC[e] + 2 H[e] + 0.6 ADP[c] + 0.6 Pi[c]'	Succinate export by ABC transporter
R21		'BIOMASS[c] --> BIOMASS[e]'	Growth	R21		'BIOMASS[c] --> BIOMASS[e]'	Growth	R21		'BIOMASS[c] --> BIOMASS[e]'	Growth	R21		'BIOMASS[c] --> BIOMASS[e]'	Growth	R21		'BIOMASS[c] --> BIOMASS[e]'	Growth
R22		'P-CL[c] --> PRODUCT[e]'	Product formation	R22		'P-CL[c] --> PRODUCT[e]'	Product formation	R22		'P-CL[c] --> PRODUCT[e]'	Product formation	R22		'P-CL[c] --> PRODUCT[e]'	Product formation	R22		'P-CL[c] --> PRODUCT[e]'	Product formation
R23		'O2[e] --> O2[c]'	Oxygen import by diffusion	R23		'O2[e] --> O2[c]'	Oxygen import by diffusion	R23		'O2[e] --> O2[c]'	Oxygen import by diffusion	R23		'O2[e] --> O2[c]'	Oxygen import by diffusion	R23		'O2[e] --> O2[c]'	Oxygen import by diffusion
R24		'NH3[e] --> NH3[c]'	Ammonia import by diffusion	R24		'NH3[e] --> NH3[c]'	Ammonia import by diffusion	R24		'NH3[e] --> NH3[c]'	Ammonia import by diffusion	R24		'NH3[e] --> NH3[c]'	Ammonia import by diffusion	R24		'NH3[e] --> NH3[c]'	Ammonia import by diffusion
R25		'H2[e] --> H2[c]'	Hydrogen import by diffusion	R25		'H2[e] --> H2[c]'	Hydrogen import by diffusion	R25		'H2[e] --> H2[c]'	Hydrogen import by diffusion	R25		'H2[e] --> H2[c]'	Hydrogen import by diffusion	R25		'H2[e] --> H2[c]'	Hydrogen import by diffusion
R26		'CO2[e] <--> CO2[c]'	Carbondioxide import by diffusion	R26		'CO2[e] <--> CO2[c]'	Carbondioxide import by diffusion	R26		'CO2[e] <--> CO2[c]'	Carbondioxide import by diffusion	R26		'CO2[e] <--> CO2[c]'	Carbondioxide import by diffusion	R26		'CO2[e] <--> CO2[c]'	Carbondioxide exchange by diffusion
R27		'FRC[e] + PEP[c] --> F6P[c] + PYR[c]'	PTS [ec:2.7.1.69]	R27		'FRC[e] + PEP[c] --> F6P[c] + PYR[c]'	PTS [ec:2.7.1.69]	R27		'FRC[e] + PEP[c] --> F6P[c] + PYR[c]'	PTS [ec:2.7.1.69]	R27		'FRC[e] + PEP[c] --> F6P[c] + PYR[c]'	PTS [ec:2.7.1.69]	R27		'FRC[e] + PEP[c] --> F6P[c] + PYR[c]'	PTS [ec:2.7.1.69]
R28		'GLY[e] + ATP[c] --> ADP[c] + GLY3P[c]'	Glycerol kinase [ec:2.7.1.30]	R28		'GLY[e] + ATP[c] --> ADP[c] + GLY3P[c]'	Glycerol kinase [ec:2.7.1.30]	R28		'GLY[e] + ATP[c] --> ADP[c] + GLY3P[c]'	Glycerol kinase [ec:2.7.1.30]	R28		'GLY[e] + ATP[c] --> ADP[c] + GLY3P[c]'	Glycerol kinase [ec:2.7.1.30]	R28		'GLY[e] + ATP[c] --> ADP[c] + GLY3P[c]'	Glycerol kinase [ec:2.7.1.30]
R29		'G6P[c] + NADP[c] --> 6-PG-lac[c] + NADPH[c]'	Glucose-6-phosphate dehydrogenase [ec:1.1.1.49]	R29		'G6P[c] + NADP[c] --> 6-PG-lac[c] + NADPH[c]'	Glucose-6-phosphate dehydrogenase [ec:1.1.1.49]	R29		'G6P[c] + NADP[c] --> 6-PG-lac[c] + NADPH[c]'	Glucose-6-phosphate dehydrogenase [ec:1.1.1.49]	R29		'G6P[c] + NADP[c] --> 6-PG-lac[c] + NADPH[c]'	Glucose-6-phosphate dehydrogenase [ec:1.1.1.49]	R29		'G6P[c] + NADP[c] --> 6-PG-lac[c] + NADPH[c]'	Glucose-6-phosphate dehydrogenase [ec:1.1.1.49]
R30		'6-PG-lac[c] --> 6-PG[c]'	6-phosphogluconolactonase [ec:3.1.1.31]	R30		'6-PG-lac[c] --> 6-PG[c]'	6-phosphogluconolactonase [ec:3.1.1.31]	R30		'6-PG-lac[c] --> 6-PG[c]'	6-phosphogluconolactonase [ec:3.1.1.31]	R30		'6-PG-lac[c] --> 6-PG[c]'	6-phosphogluconolactonase [ec:3.1.1.31]	R30		'6-PG-lac[c] --> 6-PG[c]'	6-phosphogluconolactonase [ec:3.1.1.31]
R31		'6-PG[c] --> KDPG[c]'	6-phosphogluconate dehydratase [ec:4.2.1.12]	R31		'6-PG[c] --> KDPG[c]'	6-phosphogluconate dehydratase [ec:4.2.1.12]	R31		'6-PG[c] --> KDPG[c]'	6-phosphogluconate dehydratase [ec:4.2.1.12]	R31		'6-PG[c] --> KDPG[c]'	6-phosphogluconate dehydratase [ec:4.2.1.12]	R31		'6-PG[c] --> KDPG[c]'	6-phosphogluconate dehydratase [ec:4.2.1.12]
R32		'KDPG[c] --> G3P[c] + PYR[c]'	2-keto-3-deoxy-6-phosphogluconate aldolase [ec:4.1.2.14]	R32		'KDPG[c] --> G3P[c] + PYR[c]'	2-keto-3-deoxy-6-phosphogluconate aldolase [ec:4.1.2.14]	R32		'KDPG[c] --> G3P[c] + PYR[c]'	2-keto-3-deoxy-6-phosphogluconate aldolase [ec:4.1.2.14]	R32		'KDPG[c] --> G3P[c] + PYR[c]'	2-keto-3-deoxy-6-phosphogluconate aldolase [ec:4.1.2.14]	R32		'KDPG[c] --> G3P[c] + PYR[c]'	2-keto-3-deoxy-6-phosphogluconate aldolase [ec:4.1.2.14]
R33		'6-PG[c] + NADP[c] --> Ril5P[c] + NADPH[c] + CO2[c]'	6-phosphogluconate dehydrogenase [ec:1.1.1.44]	R33		'6-PG[c] + NADP[c] --> Ril5P[c] + NADPH[c] + CO2[c]'	6-phosphogluconate dehydrogenase [ec:1.1.1.44]	R33		'6-PG[c] + NADP[c] --> Ril5P[c] + NADPH[c] + CO2[c]'	6-phosphogluconate dehydrogenase [ec:1.1.1.44]	R33		'6-PG[c] + NADP[c] --> Ril5P[c] + NADPH[c] + CO2[c]'	6-phosphogluconate dehydrogenase [ec:1.1.1.44]	R33		'6-PG[c] + NADP[c] --> Ril5P[c] + NADPH[c] + CO2[c]'	6-phosphogluconate dehydrogenase [ec:1.1.1.44]
R34		'Ril5P[c] + ATP[c] --> Ril15BP[c] + ADP[c]'	Phosphoribulokinase [ec:2.7.1.19]	R34		'Ril5P[c] + ATP[c] --> Ril15BP[c] + ADP[c]'	Phosphoribulokinase [ec:2.7.1.19]	R34		'Ril5P[c] + ATP[c] --> Ril15BP[c] + ADP[c]'	Phosphoribulokinase [ec:2.7.1.19]	R34		'Ril5P[c] + ATP[c] --> Ril15BP[c] + ADP[c]'	Phosphoribulokinase [ec:2.7.1.19]	R34		'Ril5P[c] + ATP[c] --> Ril15BP[c] + ADP[c]'	Phosphoribulokinase [ec:2.7.1.19]
R35		'5 Ril15BP[c] + 4 CO2[c] + 1 O2[c] --> 9 3-PG[c] + 1 PG[c]'	Ribulose-1,5-bisphosphate carboxylase/oxygenase (RuBisCO) "best case" [ec:4.1.1.39]	R35		'5 Ril15BP[c] + 4 CO2[c] + 1 O2[c] --> 9 3-PG[c] + 1 PG[c]'	Ribulose-1,5-bisphosphate carboxylase/oxygenase (RuBisCO) "best case" [ec:4.1.1.39]	R35		'5 Ril15BP[c] + 4 CO2[c] + 1 O2[c] --> 9 3-PG[c] + 1 PG[c]'	Ribulose-1,5-bisphosphate carboxylase/oxygenase (RuBisCO) "best case" [ec:4.1.1.39]	R35		'5 Ril15BP[c] + 4 CO2[c] + 1 O2[c] --> 9 3-PG[c] + 1 PG[c]'	Ribulose-1,5-bisphosphate carboxylase/oxygenase (RuBisCO) "best case" [ec:4.1.1.39]	R35		'5 Ril15BP[c] + 4 CO2[c] + 1 O2[c] --> 9 3-PG[c] + 1 PG[c]'	Ribulose-1,5-bisphosphate carboxylase/oxygenase (RuBisCO) "best case" [ec:4.1.1.39]
R36		'4 Ril15BP[c] + 3 CO2[c] + 1 O2[c] --> 7 3-PG[c] + 1 PG[c]'	Ribulose-1,5-bisphosphate carboxylase/oxygenase (RuBisCO) "worst case" [ec:4.1.1.39]	R36		'4 Ril15BP[c] + 3 CO2[c] + 1 O2[c] --> 7 3-PG[c] + 1 PG[c]'	Ribulose-1,5-bisphosphate carboxylase/oxygenase (RuBisCO) "worst case" [ec:4.1.1.39]	R36		'4 Ril15BP[c] + 3 CO2[c] + 1 O2[c] --> 7 3-PG[c] + 1 PG[c]'	Ribulose-1,5-bisphosphate carboxylase/oxygenase (RuBisCO) "worst case" [ec:4.1.1.39]	R36		'4 Ril15BP[c] + 3 CO2[c] + 1 O2[c] --> 7 3-PG[c] + 1 PG[c]'	Ribulose-1,5-bisphosphate carboxylase/oxygenase (RuBisCO) "worst case" [ec:4.1.1.39]	R36		'4 Ril15BP[c] + 3 CO2[c] + 1 O2[c] --> 7 3-PG[c] + 1 PG[c]'	Ribulose-1,5-bisphosphate carboxylase/oxygenase (RuBisCO) "worst case" [ec:4.1.1.39]
R37		'PG[c] --> GA[c] + Pi[c]'	2-phosphoglycolate phosphohydrolase [ec:3.1.3.18]	R37		'PG[c] --> GA[c] + Pi[c]'	2-phosphoglycolate phosphohydrolase [ec:3.1.3.18]	R37		'PG[c] --> GA[c] + Pi[c]'	2-phosphoglycolate phosphohydrolase [ec:3.1.3.18]	R37		'PG[c] --> GA[c] + Pi[c]'	2-phosphoglycolate phosphohydrolase [ec:3.1.3.18]	R37		'PG[c] --> GA[c] + Pi[c]'	2-phosphoglycolate phosphohydrolase [ec:3.1.3.18]
R38		'2 GA[c] + O2[c] --> 2 GLYOX[c]'	Glycolate dehydrogenase [ec:1.1.99.14]	R38		'2 GA[c] + O2[c] --> 2 GLYOX[c]'	Glycolate dehydrogenase [ec:1.1.99.14]	R38		'2 GA[c] + O2[c] --> 2 GLYOX[c]'	Glycolate dehydrogenase [ec:1.1.99.14]	R38		'2 GA[c] + O2[c] --> 2 GLYOX[c]'	Glycolate dehydrogenase [ec:1.1.99.14]	R38		'2 GA[c] + O2[c] --> 2 GLYOX[c]'	Glycolate dehydrogenase [ec:1.1.99.14]
R39		'2 GLYOX[c] --> TS[c] + CO2[c]'	Tartronate-semialdehyde synthase [ec:4.1.1.47]	R39		'2 GLYOX[c] --> TS[c] + CO2[c]'	Tartronate-semialdehyde synthase [ec:4.1.1.47]	R39		'2 GLYOX[c] --> TS[c] + CO2[c]'	Tartronate-semialdehyde synthase [ec:4.1.1.47]	R39		'2 GLYOX[c] --> TS[c] + CO2[c]'	Tartronate-semialdehyde synthase [ec:4.1.1.47]	R39		'2 GLYOX[c] --> TS[c] + CO2[c]'	Tartronate-semialdehyde synthase [ec:4.1.1.47]
R40		'TS[c] + NADH[c] --> Glycerate[c] + NAD[c]'	2-hydroxy-3-oxopropionate reductase [ec:1.1.1.60]	R40		'TS[c] + NADH[c] --> Glycerate[c] + NAD[c]'	2-hydroxy-3-oxopropionate reductase [ec:1.1.1.60]	R40		'TS[c] + NADH[c] --> Glycerate[c] + NAD[c]'	2-hydroxy-3-oxopropionate reductase [ec:1.1.1.60]	R40		'TS[c] + NADH[c] --> Glycerate[c] + NAD[c]'	2-hydroxy-3-oxopropionate reductase [ec:1.1.1.60]	R40		'TS[c] + NADH[c] --> Glycerate[c] + NAD[c]'	2-hydroxy-3-oxopropionate reductase [ec:1.1.1.60]
R41		'Glycerate[c] + ATP[c] --> 2-PG[c] + ADP[c]'	Glycerate 2-kinase [ec:2.7.1.165]	R41		'Glycerate[c] + ATP[c] --> 2-PG[c] + ADP[c]'	Glycerate 2-kinase [ec:2.7.1.165]	R41		'Glycerate[c] + ATP[c] --> 2-PG[c] + ADP[c]'	Glycerate 2-kinase [ec:2.7.1.165]	R41		'Glycerate[c] + ATP[c] --> 2-PG[c] + ADP[c]'	Glycerate 2-kinase [ec:2.7.1.165]	R41		'Glycerate[c] + ATP[c] --> 2-PG[c] + ADP[c]'	Glycerate 2-kinase [ec:2.7.1.165]
R42		'Ril5P[c] <--> R5P[c]'	Ribose-5-phosphate isomerase [ec:5.3.1.6]	R42		'Ril5P[c] <--> R5P[c]'	Ribose-5-phosphate isomerase [ec:5.3.1.6]	R42		'Ril5P[c] <--> R5P[c]'	Ribose-5-phosphate isomerase [ec:5.3.1.6]	R42		'Ril5P[c] <--> R5P[c]'	Ribose-5-phosphate isomerase [ec:5.3.1.6]	R42		'Ril5P[c] <--> R5P[c]'	Ribose-5-phosphate isomerase [ec:5.3.1.6]
R43		'Ril5P[c] <--> X5P[c]'	Ribulose-phosphate 3-epimerase [ec:5.1.3.1]	R43		'Ril5P[c] <--> X5P[c]'	Ribulose-phosphate 3-epimerase [ec:5.1.3.1]	R43		'Ril5P[c] <--> X5P[c]'	Ribulose-phosphate 3-epimerase [ec:5.1.3.1]	R43		'Ril5P[c] <--> X5P[c]'	Ribulose-phosphate 3-epimerase [ec:5.1.3.1]	R43		'Ril5P[c] <--> X5P[c]'	Ribulose-phosphate 3-epimerase [ec:5.1.3.1]
R44		'R5P[c] + X5P[c] <--> G3P[c] + S7P[c]'	Transketolase [ec:2.2.1.1]	R44		'R5P[c] + X5P[c] <--> G3P[c] + S7P[c]'	Transketolase [ec:2.2.1.1]	R44		'R5P[c] + X5P[c] <--> G3P[c] + S7P[c]'	Transketolase [ec:2.2.1.1]	R44		'R5P[c] + X5P[c] <--> G3P[c] + S7P[c]'	Transketolase [ec:2.2.1.1]	R44		'R5P[c] + X5P[c] <--> G3P[c] + S7P[c]'	Transketolase [ec:2.2.1.1]
R45		'G3P[c] + S7P[c] <--> E4P[c] + F6P[c]'	Transaldolase [ec:2.2.1.2]	R45		'G3P[c] + S7P[c] <--> E4P[c] + F6P[c]'	Transaldolase [ec:2.2.1.2]	R45		'G3P[c] + S7P[c] <--> E4P[c] + F6P[c]'	Transaldolase [ec:2.2.1.2]	R45		'G3P[c] + S7P[c] <--> E4P[c] + F6P[c]'	Transaldolase [ec:2.2.1.2]	R45		'G3P[c] + S7P[c] <--> E4P[c] + F6P[c]'	Transaldolase [ec:2.2.1.2]
R46		'X5P[c] + E4P[c] <--> F6P[c] + G3P[c]'	Transketolase [ec:2.2.1.1]	R46		'X5P[c] + E4P[c] <--> F6P[c] + G3P[c]'	Transketolase [ec:2.2.1.1]	R46		'X5P[c] + E4P[c] <--> F6P[c] + G3P[c]'	Transketolase [ec:2.2.1.1]	R46		'X5P[c] + E4P[c] <--> F6P[c] + G3P[c]'	Transketolase [ec:2.2.1.1]	R46		'X5P[c] + E4P[c] <--> F6P[c] + G3P[c]'	Transketolase [ec:2.2.1.1]
R47		'G6P[c] <--> F6P[c]'	Glucose-6-phosphate isomerase [ec:5.3.1.9]	R47		'G6P[c] <--> F6P[c]'	Glucose-6-phosphate isomerase [ec:5.3.1.9]	R47		'G6P[c] <--> F6P[c]'	Glucose-6-phosphate isomerase [ec:5.3.1.9]	R47		'G6P[c] <--> F6P[c]'	Glucose-6-phosphate isomerase [ec:5.3.1.9]	R47		'G6P[c] <--> F6P[c]'	Glucose-6-phosphate isomerase [ec:5.3.1.9]
R48		'F16BP[c] --> F6P[c] + Pi[c]'	Fructose-bisphosphatase [ec:3.1.3.11]	R48		'F16BP[c] --> F6P[c] + Pi[c]'	Fructose-bisphosphatase [ec:3.1.3.11]	R48		'F16BP[c] --> F6P[c] + Pi[c]'	Fructose-bisphosphatase [ec:3.1.3.11]	R48		'F16BP[c] --> F6P[c] + Pi[c]'	Fructose-bisphosphatase [ec:3.1.3.11]	R48		'F16BP[c] --> F6P[c] + Pi[c]'	Fructose-bisphosphatase [ec:3.1.3.11]
R49		'F16BP[c] <--> G3P[c] + DHAP[c]'	Fructose-bisphosphate aldolase [ec:4.1.2.13]	R49		'F16BP[c] <--> G3P[c] + DHAP[c]'	Fructose-bisphosphate aldolase [ec:4.1.2.13]	R49		'F16BP[c] <--> G3P[c] + DHAP[c]'	Fructose-bisphosphate aldolase [ec:4.1.2.13]	R49		'F16BP[c] <--> G3P[c] + DHAP[c]'	Fructose-bisphosphate aldolase [ec:4.1.2.13]	R49		'F16BP[c] <--> G3P[c] + DHAP[c]'	Fructose-bisphosphate aldolase [ec:4.1.2.13]
R50		'GLY3P[c] + NAD[c] --> DHAP[c] + NADH[c]'	Glycerol-3-phosphate dehydrogenase [ec:1.1.1.8]	R50		'GLY3P[c] + NAD[c] --> DHAP[c] + NADH[c]'	Glycerol-3-phosphate dehydrogenase [ec:1.1.1.8]	R50		'GLY3P[c] + NAD[c] --> DHAP[c] + NADH[c]'	Glycerol-3-phosphate dehydrogenase [ec:1.1.1.8]	R50		'GLY3P[c] + NAD[c] --> DHAP[c] + NADH[c]'	Glycerol-3-phosphate dehydrogenase [ec:1.1.1.8]	R50		'GLY3P[c] + NAD[c] --> DHAP[c] + NADH[c]'	Glycerol-3-phosphate dehydrogenase [ec:1.1.1.8]
R51		'DHAP[c] <--> G3P[c]'	Triose-phosphate isomerase [ec:5.3.1.1]	R51		'DHAP[c] <--> G3P[c]'	Triose-phosphate isomerase [ec:5.3.1.1]	R51		'DHAP[c] <--> G3P[c]'	Triose-phosphate isomerase [ec:5.3.1.1]	R51		'DHAP[c] <--> G3P[c]'	Triose-phosphate isomerase [ec:5.3.1.1]	R51		'DHAP[c] <--> G3P[c]'	Triose-phosphate isomerase [ec:5.3.1.1]
R52		'G3P[c] + NAD[c] + Pi[c] <--> BPG[c] + NADH[c]'	Glyceraldehyde 3-phosphate dehydrogenase [ec:1.2.1.12]	R52		'G3P[c] + NAD[c] + Pi[c] <--> BPG[c] + NADH[c]'	Glyceraldehyde 3-phosphate dehydrogenase [ec:1.2.1.12]	R52		'G3P[c] + NAD[c] + Pi[c] <--> BPG[c] + NADH[c]'	Glyceraldehyde 3-phosphate dehydrogenase [ec:1.2.1.12]	R52		'G3P[c] + NAD[c] + Pi[c] <--> BPG[c] + NADH[c]'	Glyceraldehyde 3-phosphate dehydrogenase [ec:1.2.1.12]	R52		'G3P[c] + NAD[c] + Pi[c] <--> BPG[c] + NADH[c]'	Glyceraldehyde 3-phosphate dehydrogenase [ec:1.2.1.12]
R53		'BPG[c] + ADP[c] <--> 3-PG[c] + ATP[c]'	Phosphoglycerate kinase [ec:2.7.2.3]	R53		'BPG[c] + ADP[c] <--> 3-PG[c] + ATP[c]'	Phosphoglycerate kinase [ec:2.7.2.3]	R53		'BPG[c] + ADP[c] <--> 3-PG[c] + ATP[c]'	Phosphoglycerate kinase [ec:2.7.2.3]	R53		'BPG[c] + ADP[c] <--> 3-PG[c] + ATP[c]'	Phosphoglycerate kinase [ec:2.7.2.3]	R53		'BPG[c] + ADP[c] <--> 3-PG[c] + ATP[c]'	Phosphoglycerate kinase [ec:2.7.2.3]
R54		'3-PG[c] <--> 2-PG[c]'	Phosphoglycerate mutase [ec:5.4.2.1]	R54		'3-PG[c] <--> 2-PG[c]'	Phosphoglycerate mutase [ec:5.4.2.1]	R54		'3-PG[c] <--> 2-PG[c]'	Phosphoglycerate mutase [ec:5.4.2.1]	R54		'3-PG[c] <--> 2-PG[c]'	Phosphoglycerate mutase [ec:5.4.2.1]	R54		'3-PG[c] <--> 2-PG[c]'	Phosphoglycerate mutase [ec:5.4.2.1]
R55		'2-PG[c] <--> PEP[c]'	Phosphopyruvate hydratase [ec:4.2.1.11]	R55		'2-PG[c] <--> PEP[c]'	Phosphopyruvate hydratase [ec:4.2.1.11]	R55		'2-PG[c] <--> PEP[c]'	Phosphopyruvate hydratase [ec:4.2.1.11]	R55		'2-PG[c] <--> PEP[c]'	Phosphopyruvate hydratase [ec:4.2.1.11]	R55		'2-PG[c] <--> PEP[c]'	Phosphopyruvate hydratase [ec:4.2.1.11]
R56		'PEP[c] + ADP[c] --> PYR[c] + ATP[c]'	Pyruvate kinase [ec:2.7.1.40]	R56		'PEP[c] + ADP[c] --> PYR[c] + ATP[c]'	Pyruvate kinase [ec:2.7.1.40]	R56		'PEP[c] + ADP[c] --> PYR[c] + ATP[c]'	Pyruvate kinase [ec:2.7.1.40]	R56		'PEP[c] + ADP[c] --> PYR[c] + ATP[c]'	Pyruvate kinase [ec:2.7.1.40]	R56		'PEP[c] + ADP[c] --> PYR[c] + ATP[c]'	Pyruvate kinase [ec:2.7.1.40]
R57		'PYR[c] + ATP[c] --> PEP[c] + AMP[c] + Pi[c]'	Phosphoenolpyruvate synthase [ec:2.7.9.2]	R57		'PYR[c] + ATP[c] --> PEP[c] + AMP[c] + Pi[c]'	Phosphoenolpyruvate synthase [ec:2.7.9.2]	R57		'PYR[c] + ATP[c] --> PEP[c] + AMP[c] + Pi[c]'	Phosphoenolpyruvate synthase [ec:2.7.9.2]	R57		'PYR[c] + ATP[c] --> PEP[c] + AMP[c] + Pi[c]'	Phosphoenolpyruvate synthase [ec:2.7.9.2]	R57		'PYR[c] + ATP[c] --> PEP[c] + AMP[c] + Pi[c]'	Phosphoenolpyruvate synthase [ec:2.7.9.2]
R58		'PYR[c] + NAD[c] + H-CoA[c] --> AC-CoA[c] + NADH[c] + CO2[c]'	Pyruvate dehydrogenase complex [ec:1.2.4.1&ec:2.3.1.12&ec:1.8.1.4]	R58		'PYR[c] + NAD[c] + H-CoA[c] --> AC-CoA[c] + NADH[c] + CO2[c]'	Pyruvate dehydrogenase complex [ec:1.2.4.1&ec:2.3.1.12&ec:1.8.1.4]	R58		'PYR[c] + NAD[c] + H-CoA[c] --> AC-CoA[c] + NADH[c] + CO2[c]'	Pyruvate dehydrogenase complex [ec:1.2.4.1&ec:2.3.1.12&ec:1.8.1.4]	R58		'PYR[c] + NAD[c] + H-CoA[c] --> AC-CoA[c] + NADH[c] + CO2[c]'	Pyruvate dehydrogenase complex [ec:1.2.4.1&ec:2.3.1.12&ec:1.8.1.4]	R58		'PYR[c] + NAD[c] + H-CoA[c] --> AC-CoA[c] + NADH[c] + CO2[c]'	Pyruvate dehydrogenase complex [ec:1.2.4.1&ec:2.3.1.12&ec:1.8.1.4]
R59		'PEP[c] + CO2[c] --> OXA[c] + Pi[c]'	Phosphoenolpyruvate carboxylase [ec:4.1.1.31]	R59		'PEP[c] + CO2[c] --> OXA[c] + Pi[c]'	Phosphoenolpyruvate carboxylase [ec:4.1.1.31]	R59		'PEP[c] + CO2[c] --> OXA[c] + Pi[c]'	Phosphoenolpyruvate carboxylase [ec:4.1.1.31]	R59		'PEP[c] + CO2[c] --> OXA[c] + Pi[c]'	Phosphoenolpyruvate carboxylase [ec:4.1.1.31]	R59		'PEP[c] + CO2[c] --> OXA[c] + Pi[c]'	Phosphoenolpyruvate carboxylase [ec:4.1.1.31]
R60		'PYR[c] + ATP[c] + CO2[c] <--> OXA[c] + ADP[c] + Pi[c]'	Pyruvate carboxylase [ec:6.4.1.1]	R60		'PYR[c] + ATP[c] + CO2[c] <--> OXA[c] + ADP[c] + Pi[c]'	Pyruvate carboxylase [ec:6.4.1.1]	R60		'PYR[c] + ATP[c] + CO2[c] <--> OXA[c] + ADP[c] + Pi[c]'	Pyruvate carboxylase [ec:6.4.1.1]	R60		'PYR[c] + ATP[c] + CO2[c] <--> OXA[c] + ADP[c] + Pi[c]'	Pyruvate carboxylase [ec:6.4.1.1]	R60		'PYR[c] + ATP[c] + CO2[c] <--> OXA[c] + ADP[c] + Pi[c]'	Pyruvate carboxylase [ec:6.4.1.1]
R61		'OXA[c] + ATP[c] --> PEP[c] + ADP[c] + CO2[c]'	Phosphoenolpyruvate carboxykinase [ec:4.1.1.49]	R61		'OXA[c] + ATP[c] --> PEP[c] + ADP[c] + CO2[c]'	Phosphoenolpyruvate carboxykinase [ec:4.1.1.49]	R61		'OXA[c] + ATP[c] --> PEP[c] + ADP[c] + CO2[c]'	Phosphoenolpyruvate carboxykinase [ec:4.1.1.49]	R61		'OXA[c] + ATP[c] --> PEP[c] + ADP[c] + CO2[c]'	Phosphoenolpyruvate carboxykinase [ec:4.1.1.49]	R61		'OXA[c] + ATP[c] --> PEP[c] + ADP[c] + CO2[c]'	Phosphoenolpyruvate carboxykinase [ec:4.1.1.49]
R62		'OXA[c] + AC-CoA[c] --> CIT[c] + H-CoA[c]'	Citrate synthase [ec:2.3.3.1]	R62		'OXA[c] + AC-CoA[c] --> CIT[c] + H-CoA[c]'	Citrate synthase [ec:2.3.3.1]	R62		'OXA[c] + AC-CoA[c] --> CIT[c] + H-CoA[c]'	Citrate synthase [ec:2.3.3.1]	R62		'OXA[c] + AC-CoA[c] --> CIT[c] + H-CoA[c]'	Citrate synthase [ec:2.3.3.1]	R62		'OXA[c] + AC-CoA[c] --> CIT[c] + H-CoA[c]'	Citrate synthase [ec:2.3.3.1]
R63		'CIT[c] <--> ISC[c]'	Aconitase [ec:4.2.1.3]	R63		'CIT[c] <--> ISC[c]'	Aconitase [ec:4.2.1.3]	R63		'CIT[c] <--> ISC[c]'	Aconitase [ec:4.2.1.3]	R63		'CIT[c] <--> ISC[c]'	Aconitase [ec:4.2.1.3]	R63		'CIT[c] <--> ISC[c]'	Aconitase [ec:4.2.1.3]
R64		'ISC[c] + NAD[c] --> aKG[c] + NADH[c] + CO2[c]'	Isocitrate dehydrogenase (NAD dependent) [ec:1.1.1.41]	R64		'ISC[c] + NAD[c] --> aKG[c] + NADH[c] + CO2[c]'	Isocitrate dehydrogenase (NAD dependent) [ec:1.1.1.41]	R64		'ISC[c] + NAD[c] --> aKG[c] + NADH[c] + CO2[c]'	Isocitrate dehydrogenase (NAD dependent) [ec:1.1.1.41]	R64		'ISC[c] + NAD[c] --> aKG[c] + NADH[c] + CO2[c]'	Isocitrate dehydrogenase (NAD dependent) [ec:1.1.1.41]	R64		'ISC[c] + NAD[c] --> aKG[c] + NADH[c] + CO2[c]'	Isocitrate dehydrogenase (NAD dependent) [ec:1.1.1.41]
R65		'aKG[c] + H-CoA[c] + NAD[c] --> SUC-CoA[c] + CO2[c] + NADH[c]'	α-ketoglutarate dehydrogenase [ec:1.2.4.2&2.3.1.61]	R65		'aKG[c] + H-CoA[c] + NAD[c] --> SUC-CoA[c] + CO2[c] + NADH[c]'	α-ketoglutarate dehydrogenase [ec:1.2.4.2&2.3.1.61]	R65		'aKG[c] + H-CoA[c] + NAD[c] --> SUC-CoA[c] + CO2[c] + NADH[c]'	α-ketoglutarate dehydrogenase [ec:1.2.4.2&2.3.1.61]	R65		'aKG[c] + H-CoA[c] + NAD[c] --> SUC-CoA[c] + CO2[c] + NADH[c]'	α-ketoglutarate dehydrogenase [ec:1.2.4.2&2.3.1.61]	R65		'aKG[c] + H-CoA[c] + NAD[c] --> SUC-CoA[c] + CO2[c] + NADH[c]'	α-ketoglutarate dehydrogenase [ec:1.2.4.2&2.3.1.61]
R66		'SUC-CoA[c] + ADP[c] + Pi[c] <--> SUC[c] + H-CoA[c] + ATP[c]'	Succinyl-CoA synthetase [ec:6.2.1.5]	R66		'SUC-CoA[c] + ADP[c] + Pi[c] <--> SUC[c] + H-CoA[c] + ATP[c]'	Succinyl-CoA synthetase [ec:6.2.1.5]	R66		'SUC-CoA[c] + ADP[c] + Pi[c] <--> SUC[c] + H-CoA[c] + ATP[c]'	Succinyl-CoA synthetase [ec:6.2.1.5]	R66		'SUC-CoA[c] + ADP[c] + Pi[c] <--> SUC[c] + H-CoA[c] + ATP[c]'	Succinyl-CoA synthetase [ec:6.2.1.5]	R66		'SUC-CoA[c] + ADP[c] + Pi[c] <--> SUC[c] + H-CoA[c] + ATP[c]'	Succinyl-CoA synthetase [ec:6.2.1.5]
R67		'SUC[c] + FAD[c] <--> FUM[c] + FADH2[c]'	Fumarate reductase [ec:1.3.5.4]	R67		'SUC[c] + FAD[c] <--> FUM[c] + FADH2[c]'	Fumarate reductase [ec:1.3.5.4]	R67		'SUC[c] + FAD[c] <--> FUM[c] + FADH2[c]'	Fumarate reductase [ec:1.3.5.4]	R67		'SUC[c] + FAD[c] <--> FUM[c] + FADH2[c]'	Fumarate reductase [ec:1.3.5.4]	R67		'SUC[c] + FAD[c] <--> FUM[c] + FADH2[c]'	Fumarate reductase [ec:1.3.5.4]
R68		'SUC[c] + UQ[c] --> FUM[c] + UQH2[c]'	Succinate dehydrogenase [ec:1.3.5.1]	R68		'SUC[c] + UQ[c] --> FUM[c] + UQH2[c]'	Succinate dehydrogenase [ec:1.3.5.1]	R68		'SUC[c] + UQ[c] --> FUM[c] + UQH2[c]'	Succinate dehydrogenase [ec:1.3.5.1]	R68		'SUC[c] + UQ[c] --> FUM[c] + UQH2[c]'	Succinate dehydrogenase [ec:1.3.5.1]	R68		'SUC[c] + UQ[c] --> FUM[c] + UQH2[c]'	Succinate dehydrogenase [ec:1.3.5.1]
R69		'FUM[c] <--> MAL[c]'	Fumarase [ec:4.2.1.2]	R69		'FUM[c] <--> MAL[c]'	Fumarase [ec:4.2.1.2]	R69		'FUM[c] <--> MAL[c]'	Fumarase [ec:4.2.1.2]	R69		'FUM[c] <--> MAL[c]'	Fumarase [ec:4.2.1.2]	R69		'FUM[c] <--> MAL[c]'	Fumarase [ec:4.2.1.2]
R70		'MAL[c] + NAD[c] <--> OXA[c] + NADH[c]'	Malate dehydrogenase [ec:1.1.1.37]	R70		'MAL[c] + NAD[c] <--> OXA[c] + NADH[c]'	Malate dehydrogenase [ec:1.1.1.37]	R70		'MAL[c] + NAD[c] <--> OXA[c] + NADH[c]'	Malate dehydrogenase [ec:1.1.1.37]	R70		'MAL[c] + NAD[c] <--> OXA[c] + NADH[c]'	Malate dehydrogenase [ec:1.1.1.37]	R70		'MAL[c] + NAD[c] <--> OXA[c] + NADH[c]'	Malate dehydrogenase [ec:1.1.1.37]
[truncated: 55 more rows]

## Sheet: P16HP
	C. necator on Fructose + CO2				C. necator on Glycerol + CO2				C. necator on Acetate + CO2				C. necator on Formate + CO2				C. necator on CO2 + H2
[truncated: 122 more rows]

[truncated: 11 more sheets: P3H3PP, P3H3HQP, P2H4PB, P2H3PP, P2H3PE, P3(4HP)P, P4HPA, PoHB, PmHB, PpHB, yields]
